# Supplementary material for: Unified Transcriptomic Signature of Arbuscular Mycorrhiza Colonization in Roots of Medicago truncatula by Integration of Machine Learning, Promoter Analysis, and Direct Merging Meta-Analysis
Source: Front Plant Sci. 2018 Nov 12;9:1550. doi: 10.3389/fpls.2018.01550 (PMC6240842; doi:10.3389/fpls.2018.01550)
Supplement: Supplementary Table 8 — RNA-seq based differential expression analysis of Medicago truncatula response of Arbuscular mycorrhiza (AM) inoculation compared to non-AM inoculation. [file Table_8.XLSX]

## Sheet: AM-inoculated vs. Non-inocu...
Name	Chromosome	Region	Max group mean	Log₂ fold change	Fold change	P-value	FDR p-value	Bonferroni
Medtr1g009270	chr1	1253486..1256331	5.91361	2.86094	7.2649	0	0	0
Medtr1g017910	chr1	complement(5105397..5107858)	11.8901	3.68453	12.8574	0	0	0
Medtr1g028600	chr1	complement(9698155..9700150)	240.306	9.85185	924.062	0	0	0
Medtr1g030660	chr1	10679998..10681898	21.5013	7.04338	131.907	0	0	0
Medtr1g036410	chr1	complement(13347344..13350444)	70.0629	10.1301	1120.63	0	0	0
Medtr1g040500	chr1	18617585..18620810	66.6615	6.59305	96.5398	0	0	0
Medtr1g050525	chr1	19535521..19546370	5.51256	3.6216	12.3086	0	0	0
Medtr1g050550	chr1	complement(19712167..19714149)	6.74574	2.15576	4.45604	0	0	0
Medtr1g062590	chr1	complement(27388450..27390478)	107.667	-1.37226	-2.58876	0	0	0
Medtr1g069725	chr1	complement(30383115..30384606)	7.6981	3.532	11.5674	0	0	0
Medtr1g471050	chr1	31456119..31465321	46.0304	2.84395	7.17985	0	0	0
Medtr1g075550	chr1	complement(33461452..33462419)	21.3828	4.80583	27.9704	0	0	0
Medtr1g076830	chr1	34296146..34297881	12.6385	8.20235	294.546	0	0	0
Medtr1g079120	chr1	complement(35169860..35172293)	7.13455	6.62136	98.453	0	0	0
Medtr1g080820	chr1	complement(35952385..35953845)	39.4419	2.69563	6.47837	0	0	0
Medtr1g081625	chr1	36286105..36289258	33.1701	8.22856	299.946	0	0	0
Medtr1g081640	chr1	36291162..36294871	10.2398	6.1116	69.1474	0	0	0
Medtr1g086550	chr1	complement(38725663..38728964)	20.2202	1.97936	3.94318	0	0	0
Medtr1g090707	chr1	complement(40695752..40698515)	20.4013	8.19003	292.041	0	0	0
Medtr1g090737	chr1	40755090..40757757	20.0428	8.84311	459.243	0	0	0
Medtr1g098300	chr1	44246833..44250756	5.77939	3.52046	11.4753	0	0	0
Medtr1g101370	chr1	complement(45784401..45787692)	3.13028	5.21104	37.0406	0	0	0
Medtr1g109110	chr1	49299945..49302477	30.1777	7.40534	169.524	0	0	0
Medtr2g008470	chr2	1491577..1496418	19.1141	1.64101	3.11884	0	0	0
Medtr2g008740	chr2	1594358..1596027	11.2821	8.45733	351.488	0	0	0
Medtr2g012790	chr2	complement(3291925..3293201)	28.0068	2.95126	7.73424	0	0	0
Medtr2g016730	chr2	complement(5172338..5173691)	7.57204	5.77009	54.5721	0	0	0
Medtr2g017750	chr2	5457521..5460670	27.9275	7.86493	233.12	0	0	0
Medtr2g023150	chr2	8109366..8111042	11.9779	3.15049	8.8796	0	0	0
Medtr2g030855	chr2	complement(11671573..11672658)	36.9714	7.27859	155.266	0	0	0
Medtr2g031270	chr2	complement(11719359..11720872)	19.2897	4.44183	21.7333	0	0	0
Medtr2g438310	chr2	complement(15449032..15450544)	19.5428	2.25358	4.76865	0	0	0
Medtr2g438320	chr2	complement(15458115..15459893)	16.129	2.1837	4.54316	0	0	0
Medtr2g044100	chr2	complement(19173412..19176099)	38.076	3.82096	14.1326	0	0	0
Medtr2g461970	chr2	complement(25632722..25636216)	52.9374	1.78521	3.44669	0	0	0
Medtr2g062430	chr2	26354832..26357000	5.57035	3.19774	9.17518	0	0	0
Medtr2g062560	chr2	26410129..26414001	5.56619	3.10012	8.57491	0	0	0
Medtr2g070120	chr2	complement(29504938..29505698)	92.541	5.292	39.1788	0	0	0
Medtr2g072260	chr2	30390835..30396174	10.7834	4.87872	29.42	0	0	0
Medtr2g081600	chr2	complement(34243268..34243690)	14.9376	5.66009	50.5659	0	0	0
Medtr2g086620	chr2	36420900..36421618	24.0245	7.86759	233.55	0	0	0
Medtr2g086630	chr2	36424379..36425295	137.199	10.4333	1382.7	0	0	0
Medtr2g089100	chr2	37602592..37604640	6.98008	2.10874	4.31314	0	0	0
Medtr2g089380	chr2	37768309..37769290	13.1133	5.65067	50.2367	0	0	0
Medtr2g091215	chr2	complement(39347443..39348176)	356.266	8.05122	265.251	0	0	0
Medtr2g098490	chr2	complement(42123120..42131459)	17.9568	8.68927	412.791	0	0	0
Medtr2g101920	chr2	43851532..43855716	75.3086	5.23437	37.6447	0	0	0
Medtr2g104800	chr2	45169879..45170681	19.2816	5.40936	42.499	0	0	0
Medtr3g009880	chr3	2195853..2197674	20.1706	8.78106	439.91	0	0	0
Medtr3g011630	chr3	complement(2923472..2926629)	8.45985	3.35856	10.2572	0	0	0
Medtr3g014500	chr3	4123569..4124231	9.72514	3.67534	12.7758	0	0	0
Medtr3g020880	chr3	6055504..6056068	40.7897	3.16821	8.98929	0	0	0
Medtr3g021440	chr3	complement(6281562..6285674)	37.8276	3.23557	9.41896	0	0	0
Medtr3g022830	chr3	complement(6858778..6862026)	14.8934	5.19781	36.7027	0	0	0
Medtr3g045440	chr3	complement(14781798..14783516)	8.32174	6.06192	66.8066	0	0	0
Medtr3g057910	chr3	complement(22918706..22920775)	15.4711	2.47393	5.55554	0	0	0
Medtr3g057980	chr3	22939282..22941877	9.3125	4.76872	27.2602	0	0	0
Medtr3g058060	chr3	complement(22971128..22973864)	13.4283	1.99224	3.97854	0	0	0
Medtr3g058390	chr3	complement(23145718..23147439)	10.6249	5.5423	46.6013	0	0	0
Medtr3g467150	chr3	complement(27678809..27680826)	6.85333	4.0492	16.5551	0	0	0
Medtr3g076630	chr3	34442945..34446106	100.67	1.61101	3.05466	0	0	0
Medtr3g079190	chr3	complement(35616738..35620265)	30.5236	9.29653	628.832	0	0	0
Medtr3g079570	chr3	complement(35913328..35916356)	86.7849	9.8452	919.815	0	0	0
Medtr3g079590	chr3	complement(35919897..35922606)	149.431	5.6233	49.2925	0	0	0
Medtr3g079600	chr3	complement(35926473..35929278)	24.6961	8.95161	495.111	0	0	0
Medtr3g079620	chr3	complement(35933297..35935921)	67.6036	8.5152	365.873	0	0	0
Medtr3g079630	chr3	complement(35938953..35941471)	14.7367	6.33375	80.6582	0	0	0
Medtr3g081140	chr3	complement(36751136..36752470)	84.8925	8.61641	392.461	0	0	0
Medtr3g082200	chr3	complement(37105455..37112701)	11.3604	1.98795	3.96674	0	0	0
Medtr3g083630	chr3	37749162..37751789	70.8061	3.22748	9.36633	0	0	0
Medtr3g086430	chr3	39152403..39158029	7.64102	6.00897	64.399	0	0	0
Medtr3g088965	chr3	complement(40724514..40725497)	46.7902	8.97952	504.783	0	0	0
Medtr3g090540	chr3	41032284..41035035	7.70393	7.37691	166.216	0	0	0
Medtr3g093270	chr3	complement(42630099..42632312)	7.79864	3.44079	10.8588	0	0	0
Medtr3g098650	chr3	complement(45061132..45068920)	5.9512	2.12732	4.36904	0	0	0
Medtr3g104820	chr3	complement(48315579..48317619)	9.10709	4.64596	25.0365	0	0	0
Medtr3g104900	chr3	48354290..48358260	11.1599	5.78063	54.9723	0	0	0
Medtr3g107800	chr3	complement(49733848..49739431)	1.84144	3.57982	11.9573	0	0	0
Medtr3g107810	chr3	complement(49743944..49747415)	598.198	9.83261	911.82	0	0	0
Medtr3g107830	chr3	49753901..49755581	174.605	5.68552	51.465	0	0	0
Medtr3g111900	chr3	52372230..52374345	51.1007	2.69196	6.46192	0	0	0
Medtr3g112460	chr3	52711485..52714657	13.0049	6.30401	79.0124	0	0	0
Medtr3g115940	chr3	54198460..54202630	29.916	1.5359	2.8997	0	0	0
Medtr3g118160	chr3	55299989..55307292	9.72607	5.11671	34.6963	0	0	0
Medtr4g005270	chr4	154297..167405	2.1161	6.2283	74.9731	0	0	0
Medtr4g011120	chr4	2621072..2621719	12.2334	5.01767	32.3944	0	0	0
Medtr4g011800	chr4	complement(2984165..2985715)	22.0799	5.01961	32.438	0	0	0
Medtr4g035250	chr4	complement(12078303..12087672)	7.37192	6.83769	114.38	0	0	0
Medtr4g047610	chr4	complement(16867071..16868445)	14.827	8.88603	473.11	0	0	0
Medtr4g052770	chr4	complement(19144060..19144939)	236.738	9.54293	745.949	0	0	0
Medtr4g052780	chr4	19148105..19148728	86.9515	9.19122	584.566	0	0	0
Medtr4g053630	chr4	19418613..19424375	70.9052	2.72823	6.6264	0	0	0
Medtr4g066130	chr4	complement(24927763..24936093)	10.2659	2.73506	6.65787	0	0	0
Medtr4g075590	chr4	28885867..28887300	8.83674	6.07214	67.2815	0	0	0
Medtr4g076150	chr4	complement(29142393..29143053)	54.492	9.38659	669.337	0	0	0
Medtr4g077180	chr4	29568981..29569791	317.556	10.1915	1169.35	0	0	0
Medtr4g478140	chr4	29990964..29992340	105.36	1.53725	2.90241	0	0	0
Medtr4g079470	chr4	complement(30719276..30720667)	9.84351	6.89257	118.815	0	0	0
Medtr4g079770	chr4	30880789..30882078	13.4087	8.61511	392.109	0	0	0
Medtr4g080730	chr4	complement(31193936..31195577)	3.71569	4.43272	21.5964	0	0	0
Medtr4g081190	chr4	31437802..31442803	46.9546	4.51547	22.8713	0	0	0
Medtr4g084800	chr4	33052678..33054151	32.334	2.65344	6.29165	0	0	0
Medtr4g093845	chr4	37290020..37293626	9.47391	8.8175	451.162	0	0	0
Medtr4g094515	chr4	38124942..38130679	3.08036	3.77856	13.7233	0	0	0
Medtr4g097510	chr4	40182691..40183556	23.4302	8.46586	353.571	0	0	0
Medtr4g097830	chr4	complement(40376868..40379458)	6.24915	5.45498	43.8643	0	0	0
Medtr4g102400	chr4	42444311..42446870	15.3795	3.55499	11.7533	0	0	0
Medtr4g104750	chr4	43395065..43400061	7.117	3.94854	15.4393	0	0	0
Medtr4g105090	chr4	43538822..43541072	7.80132	4.87021	29.247	0	0	0
Medtr4g107930	chr4	complement(44730694..44732137)	11.6271	7.4216	171.444	0	0	0
Medtr4g108170	chr4	44858044..44867506	2.24825	4.76554	27.2001	0	0	0
Medtr4g116640	chr4	complement(48295308..48295565)	40.8122	7.54238	186.415	0	0	0
Medtr4g117950	chr4	complement(48950939..48952363)	12.9029	7.65561	201.636	0	0	0
Medtr4g118000	chr4	complement(48973662..48975250)	13.9521	9.09225	545.808	0	0	0
Medtr4g118840	chr4	49246937..49248284	12.08	7.06347	133.757	0	0	0
Medtr4g129010	chr4	complement(53681519..53683592)	31.762	1.94337	3.84604	0	0	0
Medtr5g010590	chr5	2869609..2871940	42.4149	2.82534	7.08781	0	0	0
Medtr5g011260	chr5	complement(3201249..3203584)	12.9009	8.12344	278.869	0	0	0
Medtr5g011270	chr5	complement(3207276..3209558)	29.7713	10.7065	1671.04	0	0	0
Medtr5g011320	chr5	complement(3225135..3227381)	35.2582	6.04646	66.0945	0	0	0
Medtr5g011340	chr5	complement(3230229..3232644)	34.5492	9.028	522.034	0	0	0
Medtr5g018320	chr5	complement(6821734..6823692)	18.2829	2.77324	6.83644	0	0	0
Medtr5g018610	chr5	6948080..6949174	53.8623	4.65959	25.2741	0	0	0
Medtr5g019460	chr5	complement(7340535..7341789)	33.1459	2.3285	5.02282	0	0	0
Medtr5g020810	chr5	7969752..7973533	8.84801	8.9625	498.863	0	0	0
Medtr5g030910	chr5	13231057..13235148	13.9139	4.07436	16.8463	0	0	0
Medtr5g031030	chr5	13308133..13309153	88.6275	9.70608	835.257	0	0	0
Medtr5g031090	chr5	13333297..13334335	126.272	9.85921	928.794	0	0	0
Medtr5g031100	chr5	13336383..13337441	128.429	9.74155	856.05	0	0	0
Medtr5g031120	chr5	13339729..13340877	47.9642	10.3972	1348.56	0	0	0
Medtr5g031140	chr5	13345509..13346369	48.9342	9.50185	725.004	0	0	0
Medtr5g031160	chr5	13354203..13355702	35.422	9.18794	583.237	0	0	0
Medtr5g033510	chr5	complement(14432472..14434198)	5.40385	5.43215	43.1757	0	0	0
Medtr5g035640	chr5	15508476..15508987	288.266	9.58895	770.124	0	0	0
Medtr5g035650	chr5	15513610..15514041	86.8086	10.6342	1589.37	0	0	0
Medtr5g043550	chr5	complement(19135605..19136489)	15.2981	7.51376	182.754	0	0	0
Medtr5g045470	chr5	complement(19949151..19949959)	124.569	4.33822	20.2271	0	0	0
Medtr5g063620	chr5	complement(26358380..26358923)	103.837	3.19527	9.15949	0	0	0
Medtr5g063930	chr5	complement(26517983..26519938)	24.0942	9.17407	577.658	0	0	0
Medtr5g075400	chr5	complement(32052824..32055351)	14.2744	3.95731	15.5335	0	0	0
Medtr5g075520	chr5	32112561..32114173	135.861	9.45634	702.492	0	0	0
Medtr5g076900	chr5	complement(32800849..32802657)	376.99	9.49807	723.108	0	0	0
Medtr5g092150	chr5	complement(40242651..40245124)	18.8743	1.65917	3.15835	0	0	0
Medtr6g004000	chr6	complement(58842..60515)	15.6232	3.41519	10.6678	0	0	0
Medtr6g005630	chr6	863153..867302	5.02024	3.55352	11.7413	0	0	0
Medtr6g011490	chr6	complement(3269777..3271820)	18.8929	6.64108	99.8078	0	0	0
Medtr6g012970	chr6	4038451..4039828	38.4121	2.90172	7.47316	0	0	0
Medtr6g012980	chr6	complement(4042934..4048518)	3.66916	3.77667	13.7054	0	0	0
Medtr6g013440	chr6	4258723..4260289	6.59639	5.2042	36.8655	0	0	0
Medtr6g013450	chr6	4265607..4267301	9.79827	4.14687	17.7146	0	0	0
Medtr6g015020	chr6	4863345..4867174	60.0662	1.66137	3.16317	0	0	0
Medtr6g015950	chr6	complement(5625967..5630667)	57.9796	1.41994	2.67575	0	0	0
Medtr6g021915	chr6	complement(7571244..7575111)	30.8932	1.94241	3.84348	0	0	0
Medtr6g027840	chr6	9767853..9770137	31.4543	2.2605	4.79159	0	0	0
Medtr6g029180	chr6	10029743..10030984	15.1784	1.70827	3.2677	0	0	0
Medtr6g034940	chr6	complement(12228075..12232530)	48.1123	9.86706	933.858	0	0	0
Medtr6g043700	chr6	complement(13228759..13230010)	11.7163	4.64574	25.0326	0	0	0
Medtr6g037750	chr6	13470318..13474508	1.68018	5.90988	60.1246	0	0	0
Medtr6g051860	chr6	complement(18052428..18058032)	5.40273	5.78422	55.1091	0	0	0
Medtr6g053600	chr6	complement(19290698..19296806)	20.842	6.22696	74.9037	0	0	0
Medtr6g056070	chr6	20114959..20118282	6.6547	4.81907	28.2283	0	0	0
Medtr6g462640	chr6	complement(21779283..21781458)	18.2901	3.11266	8.64975	0	0	0
Medtr6g079630	chr6	29058520..29059610	12.5349	3.46641	11.0533	0	0	0
Medtr6g091960	chr6	complement(34662520..34672093)	1.89352	5.97108	62.73	0	0	0
Medtr7g012350	chr7	complement(3617235..3617986)	10.021	6.12924	69.9978	0	0	0
Medtr7g027190	chr7	complement(9072111..9074523)	16.9354	9.72065	843.739	0	0	0
Medtr7g062570	chr7	complement(22774969..22776837)	22.1852	9.19598	586.498	0	0	0
Medtr7g062580	chr7	complement(22778100..22780881)	214.611	1.3146	2.48733	0	0	0
Medtr7g066070	chr7	complement(24026681..24028382)	28.3253	8.10684	275.677	0	0	0
Medtr7g068600	chr7	25143946..25146531	191.325	9.42393	686.888	0	0	0
Medtr7g070800	chr7	26203521..26205009	8.30483	5.75863	54.1403	0	0	0
Medtr7g070810	chr7	26207053..26208516	8.98642	6.06152	66.7881	0	0	0
Medtr7g071840	chr7	26649175..26649936	54.1794	3.4947	11.2722	0	0	0
Medtr7g071970	chr7	26716633..26717220	108.592	4.33828	20.228	0	0	0
Medtr7g076920	chr7	complement(29057951..29058722)	10.3526	4.46131	22.0286	0	0	0
Medtr7g077050	chr7	29101739..29102299	9.48196	5.05881	33.3313	0	0	0
Medtr7g077110	chr7	29115837..29116668	19.4366	4.07347	16.836	0	0	0
Medtr7g080950	chr7	complement(30853026..30856592)	11.6599	2.18444	4.5455	0	0	0
Medtr7g082660	chr7	31690719..31693405	4.54915	2.78248	6.88036	0	0	0
Medtr7g086100	chr7	complement(33399140..33400207)	15.514	8.3891	335.251	0	0	0
Medtr7g086140	chr7	complement(33410034..33411040)	41.9525	9.31101	635.173	0	0	0
Medtr7g086160	chr7	complement(33415916..33416902)	28.7621	8.04199	263.56	0	0	0
Medtr7g086190	chr7	complement(33423956..33424961)	40.386	8.85261	462.276	0	0	0
Medtr7g086220	chr7	complement(33436074..33436997)	47.9196	9.91419	964.869	0	0	0
Medtr7g092620	chr7	36733390..36735626	15.3973	3.34239	10.1429	0	0	0
Medtr7g098040	chr7	complement(39176359..39179545)	9.06797	4.25784	19.131	0	0	0
Medtr7g098160	chr7	complement(39222635..39225457)	5.22756	6.05928	66.6847	0	0	0
Medtr7g100990	chr7	complement(40732629..40734227)	8.53082	2.8508	7.21402	0	0	0
Medtr7g102840	chr7	complement(41306750..41310540)	10.1141	6.98141	126.361	0	0	0
Medtr7g102460	chr7	41516988..41518754	18.5066	7.55583	188.161	0	0	0
Medtr7g105570	chr7	42818404..42819772	28.9599	2.8097	7.01137	0	0	0
Medtr7g112963	chr7	complement(46481124..46491194)	8.97857	2.25804	4.78343	0	0	0
Medtr7g114870	chr7	complement(47426124..47428870)	3.55355	6.17847	72.4276	0	0	0
Medtr7g115740	chr7	47870184..47872190	3.30928	3.99134	15.9043	0	0	0
Medtr7g116650	chr7	48165459..48168646	13.3602	4.81668	28.1817	0	0	0
Medtr7g117280	chr7	48446488..48452243	12.996	2.05281	4.14912	0	0	0
Medtr8g006790	chr8	complement(970171..976661)	69.5834	9.42469	687.25	0	0	0
Medtr8g010030	chr8	complement(2516139..2519414)	5.42015	4.49104	22.4873	0	0	0
Medtr8g012805	chr8	3818423..3819345	62.2221	9.63614	795.73	0	0	0
Medtr8g012835	chr8	3859859..3860744	182.947	9.61725	785.381	0	0	0
Medtr8g018650	chr8	complement(6408474..6412307)	51.9971	1.99099	3.97509	0	0	0
Medtr8g022270	chr8	complement(7861470..7869135)	23.3814	5.82804	56.8087	0	0	0
Medtr8g022790	chr8	complement(8091969..8094128)	98.2274	-0.924892	-1.89854	0	0	0
Medtr8g031150	chr8	11640537..11641359	90.6	9.97643	1007.41	0	0	0
Medtr8g036050	chr8	complement(13202212..13204086)	20.7707	3.28264	9.73132	0	0	0
Medtr8g038210	chr8	complement(14166012..14171188)	39.389	1.7347	3.32811	0	0	0
Medtr8g038220	chr8	complement(14173121..14175833)	42.7477	2.20334	4.60545	0	0	0
Medtr8g461050	chr8	complement(21370419..21371027)	72.8713	9.21606	594.716	0	0	0
Medtr8g059790	chr8	complement(21934174..21934926)	80.1306	9.1128	553.639	0	0	0
Medtr8g055940	chr8	complement(24367089..24368154)	9.16635	6.49052	89.9167	0	0	0
Medtr8g468920	chr8	complement(24988727..24991304)	16.7248	7.9429	246.066	0	0	0
Medtr8g064840	chr8	27209650..27211771	8.87123	2.43017	5.38958	0	0	0
Medtr8g065720	chr8	complement(27336280..27338265)	5.55118	2.95463	7.75235	0	0	0
Medtr8g067940	chr8	complement(28308642..28309525)	20.668	8.29128	313.273	0	0	0
Medtr8g068030	chr8	28333693..28334711	129.251	10.0307	1046	0	0	0
Medtr8g068050	chr8	complement(28341199..28343412)	5.70493	2.08495	4.24261	0	0	0
Medtr8g068265	chr8	28466086..28471025	25.733	2.3736	5.18233	0	0	0
Medtr8g068530	chr8	complement(28597194..28600951)	11.7059	7.40213	169.147	0	0	0
Medtr8g069775	chr8	29426353..29428952	4.46793	4.16435	17.9306	0	0	0
Medtr8g071050	chr8	complement(30137402..30140758)	18.8041	7.80697	223.94	0	0	0
Medtr8g074560	chr8	31526639..31528424	23.5287	9.46701	707.707	0	0	0
Medtr8g075330	chr8	31848061..31856341	17.5625	2.35121	5.10251	0	0	0
Medtr8g075990	chr8	32142751..32146250	3.866	5.28522	38.995	0	0	0
Medtr8g083170	chr8	35105064..35112698	8.48151	5.84543	57.4975	0	0	0
Medtr8g087420	chr8	36124011..36126346	5.93882	6.95872	124.39	0	0	0
Medtr8g087710	chr8	36261986..36264406	73.623	3.71878	13.1663	0	0	0
Medtr8g087780	chr8	36321984..36325169	14.1661	8.39554	336.75	0	0	0
Medtr8g091690	chr8	38261626..38263335	27.668	7.23758	150.914	0	0	0
Medtr8g091720	chr8	38281269..38282267	7.82281	4.71787	26.316	0	0	0
Medtr8g092290	chr8	38559311..38563785	7.51976	8.39703	337.099	0	0	0
Medtr8g103227	chr8	43449553..43456981	7.64869	4.42919	21.5437	0	0	0
Medtr8g103233	chr8	43461498..43464017	2.87865	3.7639	13.5846	0	0	0
Medtr8g107250	chr8	45318751..45321187	25.3467	2.94266	7.6883	0	0	0
Medtr8g107450	chr8	45426242..45429972	17.4095	4.74396	26.7963	0	0	0
Medtr8g107510	chr8	45457929..45461875	5.39174	2.69131	6.45898	0	0	0
Medtr0011s0280	scaffold0011	229705..232158	89.3553	2.48824	5.61092	0	0	0
Medtr0021s0370	scaffold0021	158580..161378	214.804	2.14237	4.41486	0	0	0
Medtr0055s0080	scaffold0055	30838..31389	13.4725	3.79311	13.8625	0	0	0
Medtr0205s0040	scaffold0205	complement(12718..21736)	17.6698	9.88277	944.081	0	0	0
Medtr0211s0080	scaffold0211	complement(25794..26510)	51.3137	8.95478	496.201	0	0	0
Medtr0262s0060	scaffold0262	complement(15322..17184)	15.1729	2.72928	6.63124	0	0	0
Medtr0536s0010	scaffold0536	470..1930	6.39152	6.6581	100.992	0	0	0
Medtr4g021725	chr4	complement(7153291..7155063)	2548.68	1.04352	2.06125	1.11022e-16	2.27659e-14	5.60041e-12
Medtr4g104020	chr4	43029167..43030858	17.899	10.3303	1287.46	1.11022e-16	2.27659e-14	5.60041e-12
Medtr6g006990	chr6	1322138..1326461	2.82291	5.68528	51.4564	1.11022e-16	2.27659e-14	5.60041e-12
Medtr8g033380	chr8	complement(12871549..12874562)	6.60289	3.13932	8.81111	1.11022e-16	2.27659e-14	5.60041e-12
Medtr2g090240	chr2	38343844..38346083	56.0798	1.39643	2.63249	2.22045e-16	4.49832e-14	1.12008e-11
Medtr3g078623	chr3	35438534..35441319	2.87701	6.33146	80.5304	2.22045e-16	4.49832e-14	1.12008e-11
Medtr3g109610	chr3	51268479..51271917	43.7695	1.48833	2.80565	2.22045e-16	4.49832e-14	1.12008e-11
Medtr3g020970	chr3	complement(6085321..6086366)	54.3105	1.70709	3.26502	4.44089e-16	8.88954e-14	2.24016e-11
Medtr4g133010	chr4	55649383..55649985	17.2969	8.01391	258.481	4.44089e-16	8.88954e-14	2.24016e-11
Medtr7g108815	chr7	44442430..44443124	7.9192	5.66673	50.7992	4.44089e-16	8.88954e-14	2.24016e-11
Medtr4g094535	chr4	complement(38176632..38179308)	4.95882	2.90266	7.47802	5.55112e-16	1.09383e-13	2.8002e-11
Medtr7g033325	chr7	complement(11911787..11914483)	10.0136	1.84258	3.5865	5.55112e-16	1.09383e-13	2.8002e-11
Medtr7g070870	chr7	26226485..26228070	2.83571	4.05367	16.6064	5.55112e-16	1.09383e-13	2.8002e-11
Medtr0083s0100	scaffold0083	45281..49347	8.1545	1.64765	3.13324	5.55112e-16	1.09383e-13	2.8002e-11
Medtr4g074130	chr4	28190446..28193469	3.81465	3.81755	14.0993	7.77156e-16	1.51362e-13	3.92029e-11
Medtr8g060550	chr8	complement(21403659..21404261)	12.3573	7.02035	129.818	7.77156e-16	1.51362e-13	3.92029e-11
Medtr8g087810	chr8	36328886..36332433	6.10712	8.06598	267.98	7.77156e-16	1.51362e-13	3.92029e-11
Medtr7g086230	chr7	complement(33441805..33442422)	18.0311	7.88942	237.111	9.99201e-16	1.9386e-13	5.04037e-11
Medtr3g099740	chr3	45724895..45726696	11.2523	2.16321	4.47911	1.22125e-15	2.34238e-13	6.16045e-11
Medtr4g126930	chr4	52599413..52602267	3.10742	4.09372	17.0739	1.22125e-15	2.34238e-13	6.16045e-11
Medtr7g028805	chr7	9930700..9931125	9.09538	4.76372	27.1658	1.22125e-15	2.34238e-13	6.16045e-11
Medtr3g014870	chr3	4294893..4295552	36.7102	10.0063	1028.51	1.33227e-15	2.54564e-13	6.72049e-11
Medtr5g044220	chr5	19437916..19441546	17.5861	1.6971	3.24248	1.55431e-15	2.95871e-13	7.84057e-11
Medtr4g075150	chr4	28685986..28692813	41.2438	1.33725	2.52669	1.9984e-15	3.78975e-13	1.00807e-10
Medtr4g102310	chr4	complement(42392718..42394804)	11.5133	9.88637	946.439	2.22045e-15	4.17941e-13	1.12008e-10
Medtr6g073090	chr6	27150313..27151482	14.5075	7.07648	134.969	2.22045e-15	4.17941e-13	1.12008e-10
Medtr5g083030	chr5	35819773..35821937	4.07869	2.58502	6.00024	2.88658e-15	5.41303e-13	1.45611e-10
Medtr7g105460	chr7	42767773..42769796	9.05958	2.55779	5.88803	4.10783e-15	7.67463e-13	2.07215e-10
Medtr7g086090	chr7	complement(33395401..33397154)	29.0076	9.88954	948.522	5.21805e-15	9.71289e-13	2.63219e-10
Medtr2g437880	chr2	14956039..14961072	7.42958	2.65275	6.28864	5.66214e-15	1.05008e-12	2.85621e-10
Medtr2g042570	chr2	18566744..18571686	1.68357	4.78263	27.5241	6.99441e-15	1.2924e-12	3.52826e-10
Medtr2g096840	chr2	41387108..41388947	12.702	3.02606	8.14583	8.32667e-15	1.53296e-12	4.20031e-10
Medtr4g102280	chr4	complement(42375953..42379136)	20.273	1.30415	2.46937	9.21485e-15	1.69031e-12	4.64834e-10
Medtr1g070135	chr1	complement(30807644..30809581)	58.7356	1.17129	2.25212	9.88098e-15	1.80593e-12	4.98436e-10
Medtr7g031847	chr7	complement(11093320..11095045)	5.36445	4.4207	21.4172	1.0103e-14	1.83985e-12	5.09637e-10
Medtr1g033360	chr1	complement(12003770..12005171)	32.0164	9.82184	905.041	1.09912e-14	1.99439e-12	5.5444e-10
Medtr4g114320	chr4	complement(46984729..46986569)	2.58612	4.41354	21.3113	1.66533e-14	3.01097e-12	8.40061e-10
Medtr4g130270	chr4	54266443..54269143	7.01	2.27171	4.82896	1.95399e-14	3.52026e-12	9.85672e-10
Medtr6g007690	chr6	1785079..1788545	3.70983	5.00643	32.1429	2.12053e-14	3.80668e-12	1.06968e-09
Medtr0002s1060	scaffold0002	complement(400364..401875)	162.245	1.34583	2.54176	3.30846e-14	5.91816e-12	1.66892e-09
Medtr3g058630	chr3	complement(23324436..23327093)	8.76837	1.69485	3.23743	3.35287e-14	5.97641e-12	1.69132e-09
Medtr2g081630	chr2	complement(34259869..34260235)	11.4212	5.81275	56.21	3.51941e-14	6.25116e-12	1.77533e-09
Medtr8g031170	chr8	11654482..11655060	33.8268	9.69422	828.42	3.75255e-14	6.64189e-12	1.89294e-09
Medtr7g012340	chr7	3618696..3619262	6.67217	5.37955	41.63	4.38538e-14	7.73483e-12	2.21216e-09
Medtr1g115195	chr1	51864615..51865729	25.4599	1.87411	3.66575	5.27356e-14	9.26897e-12	2.66019e-09
Medtr4g128180	chr4	53348816..53350493	4.41905	4.94281	30.7562	5.92859e-14	1.03841e-11	2.99062e-09
Medtr7g053290	chr7	complement(18744136..18751674)	40.4405	1.16704	2.24551	7.01661e-14	1.22473e-11	3.53946e-09
Medtr4g109150	chr4	45283948..45285675	4.70551	7.43168	172.647	7.18314e-14	1.24947e-11	3.62346e-09
Medtr2g438560	chr2	complement(15587523..15589330)	11.4455	2.04171	4.11732	7.88258e-14	1.36642e-11	3.97629e-09
Medtr5g081780	chr5	35051145..35052061	20.7261	9.34406	649.893	1.02585e-13	1.77218e-11	5.17478e-09
Medtr7g011663	chr7	complement(3175131..3186380)	29.7512	1.62275	3.07963	1.05471e-13	1.81583e-11	5.32039e-09
Medtr3g058250	chr3	complement(23038848..23040564)	3.57944	2.23532	4.70869	1.09246e-13	1.87442e-11	5.5108e-09
Medtr6g086575	chr6	complement(32589301..32592601)	3.36502	5.79073	55.3584	1.12355e-13	1.92123e-11	5.66761e-09
Medtr1g080780	chr1	complement(35928444..35929462)	7.12178	5.73989	53.4415	1.22458e-13	2.08691e-11	6.17725e-09
Medtr8g024310	chr8	complement(8913902..8918194)	86.843	1.21079	2.31464	1.82188e-13	3.09437e-11	9.19027e-09
Medtr1g069620	chr1	complement(30273938..30277729)	5.55578	9.23866	604.106	1.96509e-13	3.32642e-11	9.91272e-09
Medtr3g085740	chr3	38793220..38797762	81.043	1.19996	2.29733	2.06946e-13	3.49136e-11	1.04392e-08
Medtr3g008010	chr3	complement(1280979..1283041)	8.46807	9.1783	579.354	2.27596e-13	3.82695e-11	1.14808e-08
Medtr4g057730	chr4	21241898..21245081	1.88558	2.74852	6.72029	2.37255e-13	3.9761e-11	1.19681e-08
Medtr2g063813	chr2	complement(26956988..26965805)	1.6233	7.28909	156.4	2.53464e-13	4.23369e-11	1.27857e-08
Medtr8g089190	chr8	complement(37053824..37055698)	12.8313	2.38902	5.23802	2.78555e-13	4.63743e-11	1.40514e-08
Medtr8g074920	chr8	31673934..31676543	21.3214	1.18018	2.26605	3.68705e-13	6.11808e-11	1.8599e-08
Medtr7g080180	chr7	complement(30482239..30489482)	13.1665	1.86401	3.64018	5.24358e-13	8.67237e-11	2.64507e-08
Medtr4g133720	chr4	55939092..55939798	4.74241	5.20669	36.9291	6.4404e-13	1.0617e-10	3.2488e-08
Medtr4g096690	chr4	38471181..38475507	47.2105	1.17762	2.26203	6.80456e-13	1.11808e-10	3.43249e-08
Medtr4g057865	chr4	21371108..21373227	8.84412	3.09999	8.57413	9.46021e-13	1.54939e-10	4.77211e-08
Medtr5g083520	chr5	36047530..36052948	24.7251	1.29122	2.44734	1.21414e-12	1.98207e-10	6.12461e-08
Medtr3g089125	chr3	complement(40831984..40834426)	4.4661	3.4203	10.7056	1.30551e-12	2.12436e-10	6.58552e-08
Medtr4g057890	chr4	complement(21384217..21386449)	4.64218	2.34475	5.07973	1.31628e-12	2.135e-10	6.63984e-08
Medtr7g086820	chr7	complement(33763582..33764919)	12.1329	8.9308	488.023	1.43252e-12	2.31609e-10	7.22621e-08
Medtr5g064990	chr5	27319869..27321352	4.94513	1.85233	3.61082	1.53033e-12	2.46633e-10	7.7196e-08
Medtr1g102070	chr1	46102116..46104813	5.76793	1.70218	3.25392	1.69564e-12	2.72405e-10	8.5535e-08
Medtr7g079440	chr7	complement(30155362..30162536)	31.0344	1.17579	2.25916	1.78335e-12	2.85585e-10	8.99594e-08
Medtr7g090520	chr7	complement(35626006..35627708)	34.818	1.7932	3.46582	1.87295e-12	2.98984e-10	9.44789e-08
Medtr2g104130	chr2	44868826..44871074	34.5823	1.26843	2.40899	2.40874e-12	3.83301e-10	1.21506e-07
Medtr1g110290	chr1	complement(49735117..49737508)	5.43463	2.05916	4.16745	2.58915e-12	4.09971e-10	1.30607e-07
Medtr7g055743	chr7	complement(19128430..19132762)	3.22961	6.10637	68.897	2.59259e-12	4.09971e-10	1.30781e-07
Medtr8g012885	chr8	3900586..3901381	35.3574	8.93542	489.587	3.51164e-12	5.53565e-10	1.77141e-07
Medtr4g117750	chr4	48862818..48864913	2.73983	2.32605	5.01429	3.68883e-12	5.79686e-10	1.86079e-07
Medtr3g019160	chr3	5351072..5352297	103.816	0.725934	1.65397	4.25149e-12	6.66031e-10	2.14462e-07
Medtr2g025170	chr2	8954695..8955548	12.3848	1.96136	3.89429	4.31455e-12	6.73818e-10	2.17643e-07
Medtr7g087400	chr7	33992300..33996425	4.46942	1.95462	3.87615	5.46097e-12	8.50225e-10	2.75473e-07
Medtr8g012850	chr8	3868606..3869836	29.2867	8.67882	409.812	5.49172e-12	8.52382e-10	2.77024e-07
Medtr7g071760	chr7	26613612..26614361	6.55463	6.94343	123.078	6.28786e-12	9.72959e-10	3.17185e-07
Medtr4g009960	chr4	complement(2144712..2156354)	5.46938	1.2201	2.32964	7.65299e-12	1.18057e-09	3.86047e-07
Medtr6g477760	chr6	28528572..28534464	2.18589	6.83179	113.913	7.6803e-12	1.18117e-09	3.87425e-07
Medtr0045s0060	scaffold0045	22594..28397	39.2413	1.95084	3.86598	7.84472e-12	1.20279e-09	3.95719e-07
Medtr4g058730	chr4	21611170..21613905	3.71944	1.81361	3.5152	8.25762e-12	1.26226e-09	4.16547e-07
Medtr1g116890	chr1	52795806..52798189	9.77218	1.41198	2.66103	8.48088e-12	1.29248e-09	4.2781e-07
Medtr3g058000	chr3	complement(22946208..22947981)	10.3495	1.66314	3.16705	8.63798e-12	1.31245e-09	4.35734e-07
Medtr2g093810	chr2	complement(40012105..40013370)	3.34445	3.55521	11.755	1.00466e-11	1.5219e-09	5.06792e-07
Medtr2g073420	chr2	31129442..31132001	71.231	-0.952123	-1.93472	1.1334e-11	1.71178e-09	5.71735e-07
Medtr3g057970	chr3	complement(22931720..22934239)	4.92452	1.52322	2.87432	1.15322e-11	1.73651e-09	5.81731e-07
Medtr1g099310	chr1	44834080..44835334	422.5	-1.23089	-2.34712	1.25738e-11	1.88772e-09	6.34274e-07
Medtr2g029300	chr2	10930336..10936870	4.12983	8.51988	367.062	1.35489e-11	2.02808e-09	6.83463e-07
Medtr3g078410	chr3	35327706..35337657	9.60287	1.17618	2.25978	1.68849e-11	2.51995e-09	8.51744e-07
Medtr4g005230	chr4	complement(124806..131589)	5.84209	8.50305	362.804	1.92975e-11	2.87151e-09	9.73441e-07
Medtr3g106430	chr3	complement(49190319..49192902)	65.7729	1.14431	2.21041	2.23184e-11	3.31126e-09	1.12583e-06
Medtr4g100480	chr4	41422220..41425247	4.21479	2.34139	5.06791	2.43304e-11	3.59919e-09	1.22732e-06
Medtr7g088350	chr7	complement(34398447..34403528)	13.9635	1.12313	2.17819	2.54887e-11	3.75951e-09	1.28575e-06
Medtr7g071790	chr7	26628624..26629267	4.66742	5.04274	32.9621	2.58853e-11	3.80131e-09	1.30576e-06
Medtr8g076940	chr8	32650395..32654772	24.0953	1.09881	2.14178	2.59228e-11	3.80131e-09	1.30765e-06
Medtr1g021638	chr1	6521275..6522643	6.78084	1.86027	3.63077	2.69272e-11	3.93715e-09	1.35832e-06
Medtr8g032610	chr8	complement(12507341..12508908)	5.60034	1.81585	3.52068	2.72246e-11	3.96912e-09	1.37332e-06
Medtr1g096240	chr1	43327224..43331625	47.2911	1.03857	2.05419	2.83489e-11	4.12113e-09	1.43003e-06
Medtr2g014920	chr2	4342669..4347110	5.05457	1.77394	3.41986	2.88045e-11	4.17533e-09	1.45301e-06
Medtr7g009410	chr7	2050515..2052629	6.80562	8.41078	340.328	3.18167e-11	4.59874e-09	1.60496e-06
Medtr4g116610	chr4	complement(48308548..48308883)	18.1947	1.95999	3.8906	3.46113e-11	4.98838e-09	1.74593e-06
Medtr8g067980	chr8	28315848..28316630	10.6843	8.48504	358.305	3.50285e-11	5.03413e-09	1.76698e-06
Medtr5g086080	chr5	37215665..37218881	2.06764	3.40753	10.6113	3.97712e-11	5.69948e-09	2.00622e-06
Medtr5g012270	chr5	complement(3644799..3647379)	3.1123	2.1929	4.57225	4.31304e-11	6.16337e-09	2.17567e-06
Medtr7g103450	chr7	41858984..41861868	40.9515	1.05138	2.07251	4.5527e-11	6.48747e-09	2.29657e-06
Medtr3g020800	chr3	6034245..6035685	12.8774	6.56389	94.6079	4.68129e-11	6.65191e-09	2.36143e-06
Medtr4g121880	chr4	complement(50292139..50299737)	39.0386	1.0482	2.06795	4.83591e-11	6.85232e-09	2.43943e-06
Medtr7g115050	chr7	47501145..47503452	4.9972	8.3913	335.764	4.88612e-11	6.90408e-09	2.46476e-06
Medtr3g087980	chr3	39878065..39887996	19.4738	1.15724	2.2303	5.06104e-11	7.13126e-09	2.55299e-06
Medtr6g036780	chr6	12897180..12900412	0.875457	4.61497	24.5044	5.2198e-11	7.33448e-09	2.63308e-06
Medtr3g434790	chr3	complement(11317144..11318156)	5.08453	2.39249	5.25064	5.90409e-11	8.27294e-09	2.97826e-06
Medtr4g133890	chr4	56004969..56009577	9.13275	1.4184	2.6729	6.00859e-11	8.39605e-09	3.03097e-06
Medtr4g131180	chr4	complement(54724088..54728861)	42.7439	1.0507	2.07153	6.50122e-11	9.05933e-09	3.27948e-06
Medtr7g106880	chr7	complement(43529266..43537557)	1.58294	3.04966	8.28016	6.61924e-11	9.19837e-09	3.33901e-06
Medtr7g105560	chr7	42809591..42812532	7.75125	2.67042	6.36614	7.22172e-11	1.0008e-08	3.64293e-06
Medtr3g462710	chr3	complement(25072267..25075832)	11.5813	1.07789	2.11094	7.30285e-11	1.00927e-08	3.68385e-06
Medtr8g012890	chr8	3903544..3903985	17.3207	6.66886	101.749	7.81142e-11	1.07661e-08	3.94039e-06
Medtr4g104060	chr4	43051480..43053398	1.97976	2.70207	6.50734	7.97178e-11	1.09572e-08	4.02128e-06
Medtr3g111780	chr3	complement(52289425..52290522)	6.54751	8.26453	307.518	8.23369e-11	1.12864e-08	4.1534e-06
Medtr3g021430	chr3	complement(6277153..6281110)	50.838	-0.690489	-1.61383	8.63998e-11	1.18112e-08	4.35835e-06
Medtr7g044980	chr7	complement(15128895..15130291)	413.895	0.875934	1.8352	8.8909e-11	1.21214e-08	4.48493e-06
Medtr4g019225	chr4	6021969..6027894	114.973	-0.924533	-1.89807	9.19192e-11	1.2498e-08	4.63677e-06
Medtr7g061780	chr7	complement(22354034..22356603)	6.66546	8.15584	285.203	1.08739e-10	1.47452e-08	5.48522e-06
Medtr7g081050	chr7	30902997..30905931	5.06038	8.14351	282.775	1.12476e-10	1.52111e-08	5.67374e-06
Medtr3g079560	chr3	complement(35909107..35911950)	4.60802	8.1827	290.562	1.17937e-10	1.59069e-08	5.9492e-06
Medtr5g094380	chr5	complement(41238888..41241214)	3.92208	8.16611	287.239	1.20061e-10	1.61503e-08	6.05634e-06
Medtr3g073820	chr3	complement(33321515..33332916)	0.785139	6.43131	86.3011	1.28792e-10	1.72787e-08	6.49678e-06
Medtr0021s0160	scaffold0021	60782..62658	2.21474	3.07881	8.44919	1.43221e-10	1.91635e-08	7.22466e-06
Medtr3g117690	chr3	55101541..55103878	2.56587	6.41116	85.1041	1.46026e-10	1.94872e-08	7.36615e-06
Medtr1g116000	chr1	complement(52419232..52420234)	3.69715	2.88138	7.36856	1.50851e-10	2.0078e-08	7.60954e-06
Medtr6g034195	chr6	11591273..11598330	25.4994	0.991585	1.98837	1.64595e-10	2.18495e-08	8.30282e-06
Medtr2g031420	chr2	complement(11802695..11804357)	1.58265	5.14958	35.4959	1.7114e-10	2.26587e-08	8.63296e-06
Medtr3g007770	chr3	complement(1173614..1180993)	4.83211	1.2061	2.30714	1.74015e-10	2.29791e-08	8.778e-06
Medtr8g068300	chr8	28474611..28479112	4.24157	1.83451	3.56649	1.8067e-10	2.37956e-08	9.11371e-06
Medtr1g099360	chr1	complement(44850186..44854800)	51.9971	1.0297	2.0416	2.28451e-10	3.00103e-08	1.1524e-05
Medtr7g093030	chr7	complement(36940271..36942876)	4.26111	1.79255	3.46427	2.32392e-10	3.04487e-08	1.17228e-05
Medtr3g078250	chr3	complement(35245629..35248236)	1.06921	4.72587	26.4623	2.37009e-10	3.09732e-08	1.19557e-05
Medtr1g026090	chr1	8424552..8425507	11.3234	8.07064	268.847	2.42998e-10	3.16738e-08	1.22578e-05
Medtr1g105965	chr1	47884162..47888251	21.0646	1.05073	2.07157	2.64797e-10	3.44263e-08	1.33574e-05
Medtr7g012040	chr7	complement(3369039..3372863)	78.2174	-1.0648	-2.09188	2.80689e-10	3.63987e-08	1.41591e-05
Medtr6g463310	chr6	21899897..21903998	1.90367	4.08476	16.9682	2.88899e-10	3.73673e-08	1.45732e-05
Medtr7g098230	chr7	complement(39259538..39262276)	2.64062	1.96019	3.89113	3.24267e-10	4.18346e-08	1.63573e-05
Medtr4g091020	chr4	36009467..36010103	12.1408	7.98187	252.802	3.46241e-10	4.45556e-08	1.74658e-05
Medtr6g086560	chr6	complement(32148021..32152457)	8.88112	1.26731	2.40712	3.62197e-10	4.64902e-08	1.82707e-05
Medtr3g063410	chr3	28712651..28714073	7.29932	8.00233	256.413	3.70593e-10	4.74472e-08	1.86942e-05
Medtr7g111740	chr7	45890775..45893800	1.74596	3.00795	8.04422	3.9491e-10	5.04324e-08	1.99208e-05
Medtr3g032530	chr3	complement(10271423..10278947)	95.7987	0.639074	1.55733	4.57453e-10	5.82721e-08	2.30757e-05
Medtr1g081290	chr1	complement(36173413..36179133)	25.7178	0.995458	1.99371	4.75678e-10	6.04411e-08	2.39951e-05
Medtr3g107393	chr3	49544686..49546089	54.6432	1.07909	2.1127	4.85212e-10	6.14976e-08	2.4476e-05
Medtr7g078010	chr7	29462470..29465408	31.3495	0.936003	1.91322	5.12378e-10	6.4778e-08	2.58464e-05
Medtr3g072710	chr3	complement(32725078..32727063)	2.96481	1.74367	3.34885	5.17059e-10	6.52063e-08	2.60825e-05
Medtr3g088565	chr3	40295219..40297253	22.5595	1.03956	2.0556	6.77411e-10	8.52152e-08	3.41713e-05
Medtr6g043090	chr6	complement(14875572..14880864)	0.974897	6.39516	84.1657	6.97512e-10	8.75256e-08	3.51853e-05
Medtr1g096030	chr1	43289642..43291027	1.74918	2.87583	7.34024	7.1125e-10	8.9028e-08	3.58783e-05
Medtr6g082180	chr6	30681976..30683550	4.95994	1.74652	3.35548	7.92257e-10	9.89223e-08	3.99646e-05
Medtr4g090600	chr4	complement(35921845..35924998)	2.93062	2.0286	4.0801	8.85875e-10	1.10338e-07	4.46871e-05
Medtr4g018760	chr4	complement(5777438..5780265)	5.28761	1.88607	3.69626	9.17382e-10	1.13981e-07	4.62764e-05
Medtr4g064025	chr4	23886573..23887358	4.12098	3.09006	8.51532	9.77482e-10	1.2115e-07	4.93081e-05
Medtr5g069360	chr5	29403540..29411488	0.66751	3.95429	15.5011	1.0036e-09	1.24082e-07	5.06255e-05
Medtr7g101190	chr7	complement(40834269..40836017)	7.89882	1.51978	2.86748	1.02346e-09	1.26228e-07	5.16274e-05
Medtr2g075830	chr2	31726251..31727821	3.90866	7.67774	204.753	1.22125e-09	1.50255e-07	6.16046e-05
Medtr2g078730	chr2	32915003..32917941	50.0046	0.882766	1.84391	1.38879e-09	1.70452e-07	7.00559e-05
Medtr3g117560	chr3	55049134..55049463	5.92429	3.95972	15.5594	1.48642e-09	1.81992e-07	7.49807e-05
Medtr2g034950	chr2	13425610..13428014	1.10427	3.94466	15.3979	1.71159e-09	2.09054e-07	8.63395e-05
Medtr0062s0110	scaffold0062	47428..48694	12.7646	1.77426	3.42062	1.81187e-09	2.20768e-07	9.13981e-05
Medtr6g021615	chr6	complement(7420536..7421518)	611.236	0.886231	1.84834	1.83399e-09	2.22925e-07	9.25139e-05
Medtr8g010530	chr8	complement(2753812..2756960)	5.13656	1.81604	3.52114	1.86526e-09	2.26181e-07	9.40913e-05
Medtr1g105650	chr1	47634426..47637645	12.7971	-0.855875	-1.80986	2.04911e-09	2.47879e-07	0.000103366
Medtr7g028020	chr7	complement(9398278..9400728)	72.029	-1.0126	-2.01754	2.09043e-09	2.52272e-07	0.00010545
Medtr5g023170	chr5	complement(9213175..9215134)	18.7934	1.44767	2.72767	2.15384e-09	2.59303e-07	0.000108648
Medtr1g103020	chr1	complement(46606993..46612336)	22.5246	0.940616	1.91935	2.20455e-09	2.64777e-07	0.000111206
Medtr3g031380	chr3	26800771..26806492	29.198	0.941805	1.92093	2.42657e-09	2.9075e-07	0.000122406
Medtr2g099110	chr2	complement(42484922..42486505)	5.90425	1.38984	2.6205	2.45724e-09	2.93033e-07	0.000123953
Medtr4g128580	chr4	53498245..53499858	154.113	-0.885834	-1.84783	2.45457e-09	2.93033e-07	0.000123818
Medtr4g116620	chr4	complement(48306184..48306438)	17.561	7.56847	189.818	2.55149e-09	3.03555e-07	0.000128707
Medtr4g070370	chr4	26512790..26515162	25.3325	-0.944109	-1.924	2.65065e-09	3.1461e-07	0.000133709
Medtr5g072570	chr5	complement(30903173..30907133)	12.6439	1.14321	2.20872	2.87928e-09	3.40944e-07	0.000145242
Medtr4g050140	chr4	complement(17725072..17726835)	13.1944	1.21552	2.32224	3.32485e-09	3.92784e-07	0.000167719
Medtr4g075570	chr4	28881013..28882292	2.62708	5.99957	63.9808	3.57597e-09	4.21463e-07	0.000180386
Medtr2g034260	chr2	complement(13086374..13088374)	11.7994	1.08651	2.1236	3.70238e-09	4.35345e-07	0.000186763
Medtr2g079650	chr2	complement(33553506..33555029)	13.0741	-1.13499	-2.19618	3.79703e-09	4.45436e-07	0.000191537
Medtr2g105360	chr2	45424314..45427720	30.8355	0.925765	1.89969	4.1449e-09	4.85117e-07	0.000209085
Medtr7g112615	chr7	46322470..46324662	4.37713	1.45457	2.74076	4.79896e-09	5.60367e-07	0.000242079
Medtr6g034930	chr6	12218765..12220282	354.652	-0.802363	-1.74396	4.864e-09	5.6665e-07	0.00024536
Medtr7g028815	chr7	complement(9937370..9938062)	7.45325	6.02933	65.3144	4.91844e-09	5.71672e-07	0.000248106
Medtr4g077930	chr4	complement(29933331..29939586)	49.5104	-0.594528	-1.50998	5.1243e-09	5.9423e-07	0.00025849
Medtr8g012875	chr8	3891659..3893329	8.91831	7.56983	189.997	5.37514e-09	6.21889e-07	0.000271144
Medtr4g094265	chr4	37572966..37575600	59.1554	0.880699	1.84127	5.69267e-09	6.57119e-07	0.000287161
Medtr4g056520	chr4	complement(20739706..20745037)	35.1053	0.874676	1.8336	6.28041e-09	7.23309e-07	0.000316809
Medtr2g438260	chr2	15427023..15427886	15.6554	1.07487	2.10654	7.18019e-09	8.25051e-07	0.000362197
Medtr7g102490	chr7	41535868..41537833	3.03701	2.31619	4.98014	7.21969e-09	8.27705e-07	0.00036419
Medtr7g098150	chr7	complement(39215366..39218359)	1.23571	4.31337	19.8817	7.59311e-09	8.68541e-07	0.000383027
Medtr8g031400	chr8	11769895..11773151	183.582	-0.876464	-1.83587	8.62159e-09	9.83954e-07	0.000434908
Medtr8g093070	chr8	38898984..38900682	2.3491	2.35941	5.13161	8.93959e-09	1.01794e-06	0.000450948
Medtr2g056190	chr2	24093916..24100036	69.6293	0.590613	1.50589	9.16423e-09	1.04117e-06	0.00046228
Medtr1g059960	chr1	complement(26103090..26105962)	14.5597	1.05054	2.07131	9.25136e-09	1.04871e-06	0.000466675
Medtr7g094760	chr7	complement(37805727..37806496)	4.0646	3.10243	8.58866	9.36389e-09	1.05909e-06	0.000472352
Medtr8g099365	chr8	41863730..41864362	118.545	1.07443	2.10589	1.03507e-08	1.16808e-06	0.000522132
Medtr5g026730	chr5	11035604..11036209	6.2737	2.01751	4.04884	1.22866e-08	1.38345e-06	0.000619785
Medtr8g018570	chr8	complement(6361499..6365556)	3.85401	1.51699	2.86193	1.25342e-08	1.40819e-06	0.000632276
Medtr8g069315	chr8	29008027..29008943	926.137	-0.609813	-1.52606	1.29229e-08	1.44863e-06	0.000651885
Medtr6g009260	chr6	complement(2701629..2707070)	1.34287	4.72784	26.4985	1.31798e-08	1.47415e-06	0.000664842
Medtr3g058110	chr3	complement(22985915..22987741)	12.6668	1.21408	2.31992	1.40365e-08	1.5665e-06	0.000708058
Medtr1g021740	chr1	complement(6584225..6589072)	2.12388	1.93683	3.82864	1.43691e-08	1.59304e-06	0.000724833
Medtr4g036950	chr4	complement(13562176..13564082)	182.465	-0.588583	-1.50377	1.43267e-08	1.59304e-06	0.000722698
Medtr4g131800	chr4	54984503..54994825	8.11801	1.23744	2.3578	1.43668e-08	1.59304e-06	0.000724719
Medtr3g040370	chr3	14184186..14190817	14.9063	0.954615	1.93806	1.47199e-08	1.62835e-06	0.000742529
Medtr8g101330	chr8	complement(42532436..42540994)	73.94	0.850532	1.80317	1.51794e-08	1.67551e-06	0.000765707
Medtr4g023060	chr4	complement(7758397..7763392)	0.973673	2.11074	4.31913	1.59658e-08	1.75847e-06	0.000805379
Medtr4g093050	chr4	36933094..36935061	0.99922	3.34097	10.1329	1.66373e-08	1.82843e-06	0.00083925
Medtr3g467750	chr3	29969521..29970301	35.7407	1.02558	2.03577	1.70166e-08	1.86606e-06	0.000858385
Medtr7g103610	chr7	complement(41928539..41930375)	34.8616	0.781248	1.71862	1.84933e-08	2.02359e-06	0.000932876
Medtr1g071150	chr1	31531093..31532260	38.9046	-0.912487	-1.88229	1.86149e-08	2.03248e-06	0.000939008
Medtr1g105840	chr1	47772789..47775964	23.7809	-0.699733	-1.6242	1.95246e-08	2.12721e-06	0.000984898
Medtr6g082330	chr6	complement(30730709..30734028)	21.314	0.817872	1.7628	2.12503e-08	2.31023e-06	0.00107195
Medtr7g056803	chr7	20459888..20460924	8.40674	1.1961	2.29119	2.15197e-08	2.3345e-06	0.00108554
Medtr2g028980	chr2	complement(10792786..10794705)	15.4412	1.1097	2.15801	2.22846e-08	2.41229e-06	0.00112413
Medtr2g026510	chr2	9587448..9588191	5.94756	1.60472	3.04137	2.35486e-08	2.54365e-06	0.00118788
Medtr8g078300	chr8	complement(33373934..33375706)	1.01863	4.051	16.5757	2.45548e-08	2.64667e-06	0.00123864
Medtr8g074570	chr8	complement(31530312..31533187)	49.0943	13.0256	8338.86	2.46764e-08	2.65411e-06	0.00124478
Medtr7g012090	chr7	complement(3402497..3405344)	19.0605	0.994253	1.99205	2.62658e-08	2.81904e-06	0.00132495
Medtr1g070250	chr1	complement(30955961..30957093)	14.152	1.09049	2.12946	2.66547e-08	2.85471e-06	0.00134457
Medtr8g059425	chr8	20862231..20864143	11.0911	0.997617	1.9967	2.69285e-08	2.87793e-06	0.00135838
Medtr3g094630	chr3	43179295..43181263	167.659	-0.75708	-1.69007	2.77408e-08	2.95847e-06	0.00139936
Medtr5g079890	chr5	34175929..34177137	36.1949	-0.907003	-1.87515	2.84473e-08	3.02741e-06	0.00143499
Medtr3g073780	chr3	33297030..33301686	3.98875	1.29127	2.44743	2.92813e-08	3.10962e-06	0.00147707
Medtr4g091000	chr4	35999234..36002594	7.37375	7.22168	149.259	2.95683e-08	3.1335e-06	0.00149154
Medtr2g092930	chr2	complement(39535830..39541285)	18.0242	0.593431	1.50883	2.99222e-08	3.16435e-06	0.0015094
Medtr4g094220	chr4	complement(37398764..37403712)	20.6456	0.685572	1.60834	3.23334e-08	3.41218e-06	0.00163102
Medtr2g096230	chr2	complement(41102023..41104213)	7.27703	0.970631	1.9597	3.48229e-08	3.66723e-06	0.00175661
Medtr8g097190	chr8	complement(34874418..34877733)	22.9271	0.88071	1.84128	3.76002e-08	3.95147e-06	0.00189671
Medtr1g090783	chr1	40802894..40803364	3.55752	3.76832	13.6263	3.92525e-08	4.11654e-06	0.00198005
Medtr8g461690	chr8	complement(21797953..21798774)	59.4761	12.8599	7433.8	3.98693e-08	4.17254e-06	0.00201117
Medtr5g036410	chr5	complement(15863815..15865380)	95.6157	-0.70057	-1.62515	4.02889e-08	4.20773e-06	0.00203234
Medtr3g107870	chr3	49768124..49775604	32.2274	0.5651	1.47949	4.03917e-08	4.20975e-06	0.00203752
Medtr6g051840	chr6	complement(18049156..18050464)	7.65879	7.04964	132.481	4.06948e-08	4.2326e-06	0.00205281
Medtr7g074730	chr7	27957998..27961380	12.0952	-0.8924	-1.85626	4.31291e-08	4.47655e-06	0.0021756
Medtr2g037790	chr2	complement(16365274..16372671)	4.87828	1.35715	2.56179	4.66699e-08	4.83412e-06	0.00235422
Medtr1g062970	chr1	27656037..27661236	1.43128	5.61441	48.9897	4.98799e-08	5.15603e-06	0.00251614
Medtr4g099310	chr4	complement(41203064..41204814)	3.35034	2.9218	7.57792	5.08371e-08	5.24422e-06	0.00256443
Medtr3g085630	chr3	38717092..38721880	2.30762	1.61358	3.06009	5.10938e-08	5.25995e-06	0.00257737
Medtr1g080990	chr1	complement(36060795..36062765)	441.579	-0.851623	-1.80453	5.30075e-08	5.44584e-06	0.00267391
Medtr2g020360	chr2	6766782..6773328	197.182	0.816483	1.76111	5.73917e-08	5.88428e-06	0.00289507
Medtr8g010200	chr8	complement(2609370..2610443)	58.4758	-0.735929	-1.66547	6.01919e-08	6.15887e-06	0.00303632
Medtr3g011730	chr3	complement(2968966..2974308)	42.3006	0.906915	1.87503	6.11471e-08	6.24394e-06	0.0030845
Medtr4g075450	chr4	complement(28789382..28789840)	6.89473	7.06619	134.01	6.38743e-08	6.50924e-06	0.00322207
Medtr3g449540	chr3	16874341..16887068	9.21631	-0.788657	-1.72747	6.49361e-08	6.6041e-06	0.00327563
Medtr4g074670	chr4	28452022..28459826	18.5193	-1.02911	-2.04077	6.75439e-08	6.8555e-06	0.00340719
Medtr1g105130	chr1	24984621..24985495	57.4457	12.5749	6101.46	7.04624e-08	7.13736e-06	0.00355441
Medtr8g067990	chr8	28320155..28320988	3.55929	6.97625	125.91	7.32389e-08	7.40374e-06	0.00369446
Medtr8g038580	chr8	14304801..14308078	1.07627	3.32723	10.0368	7.88133e-08	7.95132e-06	0.00397566
Medtr7g024950	chr7	complement(8261732..8263256)	10.9937	1.01016	2.01414	7.908e-08	7.9623e-06	0.00398911
Medtr3g479590	chr3	35835958..35839483	3.05438	-5.94843	-61.7527	8.58175e-08	8.62346e-06	0.00432898
Medtr7g013100	chr7	3720376..3725453	28.6966	0.796588	1.73699	9.25668e-08	9.28318e-06	0.00466944
Medtr7g063320	chr7	23056227..23060595	2.72106	2.00641	4.01781	9.45861e-08	9.46687e-06	0.0047713
Medtr4g093040	chr4	36929484..36932017	1.49016	1.6169	3.06715	1.0295e-07	1.02836e-05	0.00519322
Medtr8g031940	chr8	complement(11971921..11975439)	8.74772	1.00648	2.00901	1.10078e-07	1.09739e-05	0.00555278
Medtr4g057595	chr4	21143126..21147112	4.96675	1.05047	2.0712	1.18923e-07	1.18323e-05	0.00599897
Medtr2g018590	chr2	5856917..5861023	18.4814	0.951809	1.9343	1.20911e-07	1.19828e-05	0.00609923
Medtr2g031530	chr2	11847746..11850844	13.6917	-0.695038	-1.61893	1.20795e-07	1.19828e-05	0.00609338
Medtr2g029910	chr2	complement(11190342..11192617)	428.975	0.531783	1.44572	1.21922e-07	1.20592e-05	0.00615021
Medtr7g099570	chr7	39943277..39945382	1.38939	6.75354	107.899	1.25424e-07	1.23814e-05	0.00632689
Medtr6g015695	chr6	5366226..5372458	0.545967	5.43771	43.3424	1.26709e-07	1.24838e-05	0.0063917
Medtr7g110980	chr7	45503066..45505731	31.7548	0.589081	1.50429	1.30652e-07	1.28472e-05	0.0065906
Medtr3g110195	chr3	complement(51196407..51201204)	20.4059	0.709211	1.63491	1.37592e-07	1.35033e-05	0.00694067
Medtr3g467130	chr3	27669661..27672771	2.79511	1.44012	2.71343	1.39748e-07	1.36882e-05	0.00704943
Medtr5g031270	chr5	complement(13395866..13400641)	0.859564	6.84799	115.199	1.45045e-07	1.41796e-05	0.00731666
Medtr1g027250	chr1	complement(8999283..9000272)	1.58592	5.27033	38.5946	1.48494e-07	1.44403e-05	0.00749062
Medtr6g036620	chr6	complement(12837292..12838070)	86.0658	0.56461	1.47899	1.48161e-07	1.44403e-05	0.00747382
Medtr7g045370	chr7	complement(15955054..15960760)	26.6819	0.678681	1.60068	1.48571e-07	1.44403e-05	0.00749451
Medtr7g066870	chr7	complement(24399341..24405339)	63.9657	0.698606	1.62294	1.53722e-07	1.49122e-05	0.00775435
Medtr4g104880	chr4	complement(43448823..43453771)	346.428	-0.56966	-1.48417	1.69448e-07	1.64062e-05	0.00854765
Medtr4g122110	chr4	50422396..50423373	28.6485	0.865596	1.82209	1.70126e-07	1.64403e-05	0.00858185
Medtr8g031900	chr8	complement(11943281..11946010)	20.3916	0.994568	1.99248	1.75377e-07	1.69153e-05	0.00884671
Medtr4g087100	chr4	complement(34125168..34127490)	8.91823	-0.929206	-1.90423	1.78202e-07	1.7155e-05	0.00898923
Medtr8g035880	chr8	complement(13117744..13119789)	20.0554	12.1328	4490.97	1.83219e-07	1.76044e-05	0.0092423
Medtr0045s0070	scaffold0045	30625..36273	19.5172	0.886972	1.84929	2.03291e-07	1.94958e-05	0.0102548
Medtr5g041780	chr5	complement(18344289..18348340)	36.3553	-0.711155	-1.63711	2.06625e-07	1.9778e-05	0.010423
Medtr8g069283	chr8	28996145..28996955	219.777	-0.665868	-1.58652	2.19755e-07	2.09949e-05	0.0110853
Medtr7g077090	chr7	complement(29110794..29111363)	4.2718	6.69973	103.949	2.23439e-07	2.13066e-05	0.0112712
Medtr4g052620	chr4	complement(19085634..19088028)	12.8922	-0.908365	-1.87692	2.30809e-07	2.19678e-05	0.0116429
Medtr2g099470	chr2	complement(42638323..42640316)	100.825	-0.816483	-1.76111	2.33926e-07	2.22225e-05	0.0118001
Medtr1g062200	chr1	27144688..27152668	4.95057	0.942704	1.92213	2.4187e-07	2.2934e-05	0.0122009
Medtr2g086700	chr2	36455122..36457181	18.6527	0.76495	1.69931	2.48955e-07	2.35615e-05	0.0125583
Medtr7g070860	chr7	26223156..26224633	1.67486	6.67151	101.935	2.59061e-07	2.4472e-05	0.0130681
Medtr3g067510	chr3	complement(30085731..30086848)	84.5145	0.633821	1.55167	3.12202e-07	2.94368e-05	0.0157487
Medtr4g126920	chr4	52590097..52591687	40.0344	-0.69517	-1.61908	3.16387e-07	2.97758e-05	0.0159598
Medtr3g026280	chr3	8088913..8094109	17.4631	11.9437	3939.23	3.31579e-07	3.11474e-05	0.0167262
Medtr5g010640	chr5	complement(2891505..2892704)	512.285	-0.695012	-1.6189	3.5057e-07	3.28702e-05	0.0176842
Medtr4g059680	chr4	complement(22011588..22017171)	8.38377	0.864263	1.82041	3.54684e-07	3.31942e-05	0.0178917
Medtr5g093570	chr5	40855984..40859737	17.1877	0.908818	1.87751	3.59328e-07	3.35666e-05	0.0181259
Medtr2g088370	chr2	complement(37244408..37245154)	13.6141	1.09741	2.13971	3.89243e-07	3.62939e-05	0.019635
Medtr3g014820	chr3	4286399..4287257	27.3334	11.8035	3574.39	3.96561e-07	3.6908e-05	0.0200041
Medtr2g086640	chr2	36427352..36428046	35.1289	11.8585	3713.26	4.0206e-07	3.73509e-05	0.0202815
Medtr3g067280	chr3	complement(29926556..29927479)	30.9789	0.917818	1.88926	4.1276e-07	3.82743e-05	0.0208212
Medtr8g106670	chr8	45024349..45027049	0.984386	3.51468	11.4294	4.13521e-07	3.82746e-05	0.0208597
Medtr6g029330	chr6	complement(10106129..10106936)	40.5888	0.792571	1.73216	4.17146e-07	3.85394e-05	0.0210425
Medtr7g014510	chr7	4159406..4161617	60.3806	-0.621789	-1.53878	4.18186e-07	3.85648e-05	0.021095
Medtr7g013680	chr7	complement(3954330..3957078)	23.1606	-0.546408	-1.46045	4.29436e-07	3.953e-05	0.0216624
Medtr5g076170	chr5	32436731..32437833	54.6826	-0.65983	-1.5799	4.54138e-07	4.17278e-05	0.0229086
Medtr0100s0150	scaffold0100	33656..34541	25.1075	11.7289	3394.3	4.63508e-07	4.25113e-05	0.0233812
Medtr5g022560	chr5	8898326..8899733	17.0977	11.7385	3416.89	4.74001e-07	4.33948e-05	0.0239105
Medtr2g007880	chr2	1182169..1183661	6.76696	-0.980827	-1.9736	4.77129e-07	4.3602e-05	0.0240683
Medtr4g037670	chr4	15021715..15030707	5.99208	1.06647	2.0943	4.99173e-07	4.5534e-05	0.0251803
Medtr1g115230	chr1	complement(51923027..51929794)	16.9809	0.790015	1.72909	5.14932e-07	4.68867e-05	0.0259752
Medtr7g075580	chr7	complement(28306169..28310820)	24.4971	-0.543742	-1.45775	5.19674e-07	4.72332e-05	0.0262144
Medtr7g080900	chr7	complement(30816788..30818861)	37.459	-0.538755	-1.45272	5.22213e-07	4.73787e-05	0.0263425
Medtr6g007687	chr6	complement(1782027..1784332)	1.69944	6.51882	91.6982	5.35408e-07	4.84885e-05	0.0270081
Medtr4g091200	chr4	36107336..36109152	19.9441	-0.778892	-1.71581	5.81618e-07	5.25791e-05	0.0293391
Medtr2g011580	chr2	2826208..2828224	1.72156	3.09227	8.52839	6.18894e-07	5.58488e-05	0.0312195
Medtr6g073040	chr6	27108365..27109793	26.3531	11.6348	3179.89	6.36645e-07	5.73481e-05	0.0321149
Medtr7g116850	chr7	complement(48221861..48223396)	10.919	1.12096	2.17492	6.6673e-07	5.99511e-05	0.0336326
Medtr4g097220	chr4	complement(40060326..40063713)	6.90355	0.994558	1.99247	7.08696e-07	6.36112e-05	0.0357495
Medtr4g094772	chr4	complement(38931126..38934189)	36.0165	-0.635556	-1.55354	7.14789e-07	6.40441e-05	0.0360568
Medtr8g089650	chr8	37302350..37304422	14.8378	0.694658	1.6185	7.21214e-07	6.45052e-05	0.0363809
Medtr4g036300	chr4	11851296..11851862	3.73145	6.50205	90.6382	7.7135e-07	6.88672e-05	0.03891
Medtr5g006740	chr5	1051781..1053835	1.09053	3.47987	11.1569	8.13673e-07	7.25175e-05	0.0410449
Medtr2g438630	chr2	complement(15617679..15617983)	16.4565	1.39277	2.62583	8.33769e-07	7.41775e-05	0.0420586
Medtr1g055255	chr1	complement(24417898..24422244)	1.29317	1.82905	3.55303	8.35883e-07	7.42347e-05	0.0421653
Medtr8g008660	chr8	complement(1800112..1801920)	33.4866	0.610354	1.52663	8.46357e-07	7.50328e-05	0.0426936
Medtr8g086640	chr8	35961338..35962088	8.34369	1.52409	2.87606	8.6083e-07	7.6182e-05	0.0434237
Medtr0084s0030	scaffold0084	16850..17730	20.9741	11.458	2813.22	8.73327e-07	7.71525e-05	0.0440541
Medtr2g102640	chr2	complement(44208769..44216038)	7.09611	-0.732805	-1.66187	8.77833e-07	7.74151e-05	0.0442814
Medtr2g062310	chr2	complement(26303022..26306172)	1.30006	3.25434	9.54233	8.88379e-07	7.80757e-05	0.0448134
Medtr3g080220	chr3	36283957..36289285	1.87295	1.09919	2.14234	8.8945e-07	7.80757e-05	0.0448674
Medtr5g094840	chr5	41463196..41466146	12.0945	11.472	2840.73	8.89967e-07	7.80757e-05	0.0448935
Medtr1g014160	chr1	complement(3091946..3095952)	2.75337	6.40497	84.7399	9.26107e-07	8.11051e-05	0.0467166
Medtr2g025080	chr2	8901978..8903156	10.8877	0.992028	1.98898	9.50384e-07	8.3087e-05	0.0479412
Medtr1g080800	chr1	complement(35939136..35940128)	116.613	-0.872314	-1.8306	1.03359e-06	9.00494e-05	0.0521386
Medtr3g115930	chr3	complement(54187330..54195222)	96.1481	0.505248	1.41937	1.03212e-06	9.00494e-05	0.052064
Medtr4g082345	chr4	32072436..32073389	2.00242	6.33969	80.9911	1.06164e-06	9.23331e-05	0.0535532
Medtr8g018690	chr8	complement(6422466..6426852)	30.0618	0.653651	1.57314	1.08632e-06	9.43175e-05	0.0547985
Medtr7g065265	chr7	complement(23800564..23802857)	151.485	-0.49985	-1.41407	1.13756e-06	9.85962e-05	0.057383
Medtr1g090920	chr1	complement(41020023..41024460)	26.4197	0.729534	1.6581	1.14856e-06	9.93788e-05	0.0579378
Medtr4g053785	chr4	19475505..19484882	10.1122	-0.769762	-1.70499	1.17362e-06	0.000101374	0.0592021
Medtr6g011560	chr6	3320360..3324298	53.1695	0.515009	1.429	1.19489e-06	0.000103034	0.0602748
Medtr4g106870	chr4	complement(43906312..43911321)	47.636	0.565284	1.47968	1.19941e-06	0.000103247	0.0605028
Medtr6g471740	chr6	complement(25778565..25779518)	230.721	-0.622902	-1.53997	1.25086e-06	0.000107493	0.0630984
Medtr4g035650	chr4	12305709..12310713	32.9106	0.754627	1.6872	1.25627e-06	0.000107774	0.0633712
Medtr0090s0020	scaffold0090	complement(7455..10869)	26.0529	-0.511398	-1.42543	1.27477e-06	0.000109176	0.0643047
Medtr1g061540	chr1	26861749..26863761	3.66352	1.69553	3.23897	1.30504e-06	0.000111578	0.0658312
Medtr1g021820	chr1	complement(6590938..6594604)	7.31299	1.0488	2.06881	1.40297e-06	0.000119642	0.0707716
Medtr5g007210	chr5	1243259..1247003	122.869	0.625082	1.5423	1.40409e-06	0.000119642	0.0708278
Medtr4g119790	chr4	49633553..49634198	47.9294	-0.664263	-1.58476	1.50361e-06	0.000127906	0.075848
Medtr8g005550	chr8	complement(227384..230618)	3.43271	-3.25437	-9.54251	1.51298e-06	0.000128486	0.0763205
Medtr3g088760	chr3	40577145..40580500	10.1013	-0.706058	-1.63134	1.61343e-06	0.000136786	0.0813879
Medtr3g007690	chr3	complement(1120010..1122156)	2.79602	2.35071	5.10075	1.63354e-06	0.000138259	0.0824022
Medtr6g011860	chr6	3555895..3560091	0.704102	2.98777	7.93246	1.72593e-06	0.000145834	0.0870629
Medtr3g096070	chr3	complement(43903423..43908519)	120.648	0.52977	1.4437	1.93751e-06	0.000163438	0.0977357
Medtr3g110330	chr3	51495442..51500559	11.8236	-0.82286	-1.76891	2.06944e-06	0.000174063	0.104391
Medtr5g017290	chr5	complement(6298442..6300645)	2.47748	1.37644	2.59627	2.07038e-06	0.000174063	0.104438
Medtr3g018790	chr3	5183225..5190126	14.3671	0.799117	1.74004	2.0838e-06	0.0001749	0.105115
Medtr2g023440	chr2	complement(8282422..8282667)	5.36064	5.02868	32.6424	2.09047e-06	0.000175169	0.105452
Medtr8g099410	chr8	41914736..41920206	51.0865	0.566698	1.48113	2.09975e-06	0.000175655	0.10592
Medtr3g093530	chr3	42738174..42746014	7.8005	0.917562	1.88892	2.15264e-06	0.000179781	0.108588
Medtr4g064887	chr4	24239094..24242368	63.0311	-0.650353	-1.56955	2.18941e-06	0.00018255	0.110443
Medtr3g111350	chr3	52030514..52035160	0.758012	6.13825	70.4367	2.22836e-06	0.000185491	0.112407
Medtr6g015905	chr6	complement(5578874..5582030)	42.9445	0.657831	1.57771	2.28331e-06	0.000189752	0.115179
Medtr0188s0020	scaffold0188	8174..11837	1.54805	1.94493	3.8502	2.43792e-06	0.000202267	0.122978
Medtr7g058640	chr7	21214758..21216356	26.4572	-0.656926	-1.57672	2.46621e-06	0.000204278	0.124405
Medtr2g014250	chr2	3995651..3996265	3.97844	2.19621	4.58274	2.52969e-06	0.000209193	0.127608
Medtr7g062020	chr7	22501853..22508938	5.74049	10.9936	2038.96	2.54245e-06	0.000209904	0.128251
Medtr7g087610	chr7	complement(34112392..34113882)	2.54921	4.30906	19.8223	2.57675e-06	0.000212388	0.129982
Medtr1g021632	chr1	complement(6510010..6513234)	0.787777	6.06477	66.9389	2.59821e-06	0.000213808	0.131064
Medtr1g105820	chr1	complement(47757298..47760553)	14.0749	-0.682839	-1.6053	2.62746e-06	0.000215862	0.132539
Medtr3g031220	chr3	complement(26964090..26968677)	38.5327	-0.491186	-1.4056	2.63808e-06	0.000216383	0.133075
Medtr3g014360	chr3	complement(4077089..4081120)	0.27239	4.19197	18.2772	2.67224e-06	0.000218829	0.134799
Medtr1g054880	chr1	complement(24060472..24062705)	31.4324	0.705132	1.63029	2.67781e-06	0.00021893	0.13508
Medtr4g058570	chr4	complement(21540064..21542051)	5.94262	1.11238	2.16202	2.73576e-06	0.000223306	0.138003
Medtr2g102030	chr2	43906744..43909269	1.90173	1.82762	3.54952	2.76738e-06	0.000225522	0.139598
Medtr8g104970	chr8	complement(44247952..44253430)	1.14314	6.11401	69.2628	2.77412e-06	0.000225706	0.139938
Medtr3g087050	chr3	complement(39465577..39467066)	12.453	0.842578	1.79325	2.78911e-06	0.00022656	0.140694
Medtr5g004800	chr5	complement(130710..133119)	18.6731	-0.822591	-1.76858	2.82709e-06	0.000229276	0.14261
Medtr7g074870	chr7	28005171..28007046	105.893	-0.745947	-1.67707	2.9268e-06	0.000236982	0.14764
Medtr7g076665	chr7	28887778..28889487	14.069	10.8932	1901.84	3.0896e-06	0.000249712	0.155852
Medtr8g012820	chr8	3829510..3830484	50.5678	10.8868	1893.39	3.09393e-06	0.000249712	0.15607
Medtr4g059670	chr4	22009293..22011297	38.2761	0.68511	1.60782	3.17084e-06	0.000255511	0.15995
Medtr1g062880	chr1	complement(27559939..27566660)	51.8685	-0.491749	-1.40615	3.2134e-06	0.000258527	0.162097
Medtr1g083290	chr1	37061947..37069385	41.2453	-0.478839	-1.39362	3.24071e-06	0.000259483	0.163475
Medtr4g079800	chr4	30891837..30893129	10.3074	10.8684	1869.5	3.23638e-06	0.000259483	0.163256
Medtr0045s0110	scaffold0045	complement(54432..57939)	63.5427	0.486796	1.40133	3.2347e-06	0.000259483	0.163171
Medtr6g023600	chr6	complement(8258693..8260168)	9.68938	0.899631	1.86559	3.25707e-06	0.000260379	0.164299
Medtr3g073180	chr3	complement(32986836..32990367)	61.6431	0.744488	1.67538	3.27219e-06	0.000261174	0.165062
Medtr7g056680	chr7	20300556..20304825	14.5628	-0.639521	-1.55781	3.33386e-06	0.000265677	0.168173
Medtr1g011640	chr1	complement(2146078..2154686)	14.409	0.779468	1.7165	3.35176e-06	0.000266681	0.169076
Medtr5g009210	chr5	complement(2149778..2151891)	1.14851	4.96448	31.2218	3.35841e-06	0.00026679	0.169412
Medtr4g024960	chr4	complement(8481916..8491949)	1.05272	3.69378	12.9401	3.55969e-06	0.000282335	0.179565
Medtr5g027810	chr5	complement(11602542..11606452)	12.5269	-0.633501	-1.55133	3.65336e-06	0.000289309	0.18429
Medtr2g010530	chr2	2431589..2433884	8.41024	0.870619	1.82845	3.87645e-06	0.000306494	0.195543
Medtr1g111140	chr1	50194256..50200333	31.9036	0.583236	1.49821	3.92809e-06	0.000310092	0.198149
Medtr4g029500	chr4	complement(10191599..10195457)	29.3116	0.64786	1.56684	3.94996e-06	0.000311331	0.199252
Medtr2g105100	chr2	complement(45319381..45323306)	23.0731	0.723487	1.65117	3.96584e-06	0.000312095	0.200053
Medtr7g028810	chr7	9932906..9933694	5.6287	3.18813	9.11428	3.98808e-06	0.000312869	0.201175
Medtr8g099035	chr8	41563481..41564631	97.1215	-0.477981	-1.39279	3.98793e-06	0.000312869	0.201167
Medtr5g033070	chr5	complement(14249153..14249676)	2.98651	6.06506	66.9523	4.0413e-06	0.000316552	0.20386
Medtr2g011160	chr2	2669417..2673461	12.1179	-0.534156	-1.44809	4.16453e-06	0.000325699	0.210076
Medtr5g018120	chr5	complement(6736080..6741242)	32.5524	-0.480706	-1.39543	4.18473e-06	0.000326771	0.211094
Medtr2g088080	chr2	complement(37089494..37092860)	21.1927	-0.497889	-1.41215	4.20037e-06	0.000327486	0.211883
Medtr0147s0050	scaffold0147	complement(13063..13680)	2.34884	5.94903	61.7782	4.27221e-06	0.000332573	0.215507
Medtr3g461000	chr3	24065055..24068423	4.60864	10.7375	1707.25	4.29445e-06	0.00033379	0.216629
Medtr3g054380	chr3	complement(21584416..21584972)	41.8099	0.648094	1.5671	4.50859e-06	0.000349357	0.227431
Medtr7g091570	chr7	complement(36225788..36226925)	1.67046	2.32103	4.99689	4.50531e-06	0.000349357	0.227266
Medtr3g028650	chr3	9170419..9172230	0.866368	5.98468	63.3242	4.54338e-06	0.000351513	0.229186
Medtr3g055120	chr3	complement(21657810..21659064)	151.802	0.569461	1.48397	4.55329e-06	0.00035174	0.229686
Medtr1g111210	chr1	50228743..50230793	38.4607	-0.493532	-1.40789	4.62503e-06	0.000356261	0.233305
Medtr2g090050	chr2	38123748..38126473	0.883521	2.86419	7.28125	4.62594e-06	0.000356261	0.233351
Medtr5g055680	chr5	22926190..22929723	23.1677	-0.779122	-1.71609	4.66148e-06	0.000358451	0.235144
Medtr2g028940	chr2	complement(10766245..10771229)	5.38714	0.63036	1.54795	4.69384e-06	0.000360389	0.236776
Medtr1g027570	chr1	complement(9155270..9158538)	0.898849	2.11677	4.33721	4.76022e-06	0.000364741	0.240125
Medtr2g011340	chr2	complement(2744857..2748302)	1.6079	-1.24008	-2.36212	4.76497e-06	0.000364741	0.240364
Medtr5g098020	chr5	complement(42913131..42915253)	17.1743	0.752236	1.6844	5.14519e-06	0.000393248	0.259544
Medtr7g080530	chr7	30651313..30655363	0.786168	4.7645	27.1804	5.1563e-06	0.000393501	0.260104
Medtr8g040940	chr8	15354196..15357869	6.96484	10.6566	1614.23	5.31833e-06	0.000405254	0.268278
Medtr4g029170	chr4	complement(10060025..10062325)	541.006	-0.616362	-1.533	5.79616e-06	0.000440997	0.292381
Medtr3g092425	chr3	42226655..42226987	193.388	-0.482001	-1.39668	5.86866e-06	0.000445171	0.296039
Medtr3g107650	chr3	complement(49646986..49647936)	10.6011	10.5832	1534.12	5.86468e-06	0.000445171	0.295838
Medtr7g014570	chr7	complement(4176231..4178146)	60.4069	-0.618873	-1.53568	5.90158e-06	0.000446325	0.297699
Medtr7g082537	chr7	complement(31635342..31636801)	30.0546	-0.639657	-1.55796	5.89801e-06	0.000446325	0.297519
Medtr7g063800	chr7	23306587..23309717	6.95301	1.34602	2.54209	5.95228e-06	0.000449242	0.300257
Medtr8g046240	chr8	18101780..18104684	2.03139	1.33213	2.51775	5.95795e-06	0.000449242	0.300543
Medtr7g113410	chr7	complement(46708553..46714819)	21.9688	-0.71782	-1.64469	6.07464e-06	0.000457357	0.306429
Medtr8g074530	chr8	31508757..31509920	6.66948	0.968157	1.95634	6.19169e-06	0.000465474	0.312333
Medtr8g014760	chr8	4713695..4720306	55.2939	-0.643548	-1.56217	6.28637e-06	0.00047189	0.31711
Medtr2g101590	chr2	43697296..43704932	49.4493	-0.466418	-1.38167	6.32148e-06	0.00047382	0.318881
Medtr4g103670	chr4	42863423..42865000	2.13206	1.92003	3.7843	6.43438e-06	0.000481567	0.324576
Medtr6g008430	chr6	complement(2261074..2264314)	6.19121	10.536	1484.79	6.49736e-06	0.00048556	0.327753
Medtr7g117310	chr7	48462977..48467212	28.2907	-0.472515	-1.38753	6.69218e-06	0.00049938	0.337581
Medtr4g070340	chr4	26501416..26504945	93.1334	-0.462845	-1.37826	6.93253e-06	0.00051655	0.349705
Medtr5g090830	chr5	complement(39552891..39554634)	9.08766	0.756366	1.68923	6.99863e-06	0.000520706	0.353039
Medtr5g021390	chr5	8259083..8262495	4.57911	-0.85079	-1.80349	7.18235e-06	0.000533589	0.362307
Medtr4g083570	chr4	complement(32570973..32572871)	7.41274	0.826456	1.77332	7.41465e-06	0.000550036	0.374025
Medtr5g062370	chr5	complement(25904566..25913155)	0.467688	5.99229	63.659	7.46714e-06	0.000553117	0.376672
Medtr4g117660	chr4	complement(48814098..48819977)	1.86866	1.18001	2.26579	7.59242e-06	0.000561572	0.382992
Medtr7g106000	chr7	complement(43048978..43049967)	233.897	-0.553218	-1.46735	7.73657e-06	0.000571396	0.390263
Medtr2g023860	chr2	8458211..8460050	2.35986	1.51547	2.85893	7.77381e-06	0.000573307	0.392142
Medtr4g074950	chr4	28574892..28578544	21.1765	0.698174	1.62245	7.88966e-06	0.000581001	0.397986
Medtr6g021870	chr6	7562757..7563391	14.0219	-0.814343	-1.7585	7.99305e-06	0.000587757	0.403201
Medtr1g111510	chr1	50384418..50386469	13.7141	0.751425	1.68346	8.46636e-06	0.000621655	0.427077
Medtr4g091010	chr4	36006163..36006750	19.2465	10.4021	1353.12	8.49216e-06	0.000622643	0.428378
Medtr8g104890	chr8	44221070..44222607	112.286	-0.588166	-1.50333	9.00383e-06	0.0006592	0.454189
Medtr3g049970	chr3	19665039..19666628	62.0886	-0.54704	-1.46109	9.02941e-06	0.000660115	0.455479
Medtr2g036260	chr2	15711040..15712293	7.63531	1.27551	2.42085	9.28492e-06	0.000676833	0.468368
Medtr0161s0050	scaffold0161	23112..24983	4.02418	1.0123	2.01713	9.28013e-06	0.000676833	0.468127
Medtr2g103170	chr2	44407172..44410139	135.322	0.452021	1.36796	9.31013e-06	0.000677692	0.46964
Medtr3g106060	chr3	complement(48922741..48926808)	21.5879	-0.6212	-1.53815	9.33221e-06	0.00067832	0.470754
Medtr4g077000	chr4	complement(29500379..29504926)	17.5595	0.682075	1.60445	9.3931e-06	0.000681763	0.473825
Medtr3g058660	chr3	complement(23334931..23336016)	0.970471	3.27788	9.69927	9.64569e-06	0.000698621	0.486567
Medtr6g071340	chr6	complement(26382933..26384681)	12.0351	-0.801526	-1.74294	9.65305e-06	0.000698621	0.486939
Medtr2g070130	chr2	complement(29506719..29507688)	33.5291	0.620272	1.53716	9.7359e-06	0.000703607	0.491118
Medtr7g072480	chr7	26949950..26952340	97.3372	-0.45733	-1.373	9.78339e-06	0.000706028	0.493513
Medtr5g044000	chr5	complement(19340200..19349034)	5.351	10.3168	1275.47	9.79783e-06	0.00070606	0.494242
Medtr1g068690	chr1	complement(29285004..29290733)	7.34318	0.890721	1.8541	9.93487e-06	0.000714914	0.501155
Medtr6g022830	chr6	complement(7994631..7998187)	3.53885	0.821939	1.76778	1.01282e-05	0.000727789	0.510908
Medtr1g112940	chr1	complement(51223413..51225322)	25.3656	0.640544	1.55892	1.08527e-05	0.000778738	0.547453
Medtr6g066190	chr6	24554668..24555510	38.2978	0.555732	1.46991	1.08886e-05	0.000780208	0.549266
Medtr4g033015	chr4	complement(11444168..11445891)	1.29972	1.98533	3.95953	1.10206e-05	0.000787427	0.555924
Medtr4g080700	chr4	complement(31185065..31186744)	2.10897	1.74353	3.34853	1.10093e-05	0.000787427	0.555351
Medtr3g055610	chr3	complement(21884439..21889362)	42.37	-0.619259	-1.53609	1.10845e-05	0.000790874	0.559148
Medtr2g102660	chr2	complement(44220748..44227634)	23.9949	-0.583995	-1.49899	1.12393e-05	0.000800786	0.566956
Medtr4g065990	chr4	24860212..24860842	41.7713	0.691234	1.61466	1.14868e-05	0.000817267	0.579443
Medtr8g005010	chr8	complement(3778..4871)	1.09208	3.71935	13.1715	1.16557e-05	0.00082811	0.587958
Medtr7g090560	chr7	35639316..35640408	32.9183	0.681927	1.60428	1.1692e-05	0.000829523	0.589791
Medtr7g078690	chr7	complement(29766266..29769870)	36.0846	-0.53187	-1.4458	1.17394e-05	0.00083172	0.592185
Medtr3g104560	chr3	48175424..48184409	104.714	0.448002	1.36415	1.19139e-05	0.000842895	0.600984
Medtr6g071895	chr6	26622119..26627615	11.9442	-0.598205	-1.51383	1.19577e-05	0.00084481	0.603195
Medtr2g015890	chr2	complement(4770207..4771989)	206.42	-0.447847	-1.364	1.24248e-05	0.000876584	0.626758
Medtr4g127140	chr4	complement(52740241..52741052)	3.3425	1.77938	3.43278	1.2697e-05	0.000894537	0.640488
Medtr3g020780	chr3	complement(6026235..6028627)	17.3602	0.810695	1.75406	1.2744e-05	0.000896591	0.642856
Medtr4g077940	chr4	complement(29940108..29943330)	9.06425	0.926702	1.90093	1.27864e-05	0.000898327	0.644999
Medtr8g041880	chr8	complement(15798924..15802331)	9.57445	-0.706437	-1.63177	1.28967e-05	0.00090481	0.650559
Medtr5g022880	chr5	complement(9061259..9067631)	124.695	-0.506617	-1.42071	1.29593e-05	0.000907941	0.653717
Medtr3g057900	chr3	22913843..22917325	164.568	-0.524048	-1.43798	1.31372e-05	0.000919127	0.662691
Medtr7g085200	chr7	32940108..32943998	1.06922	2.08954	4.25613	1.33059e-05	0.000929646	0.671204
Medtr2g027300	chr2	9968618..9972615	113.425	0.492611	1.40699	1.37131e-05	0.000956772	0.691746
Medtr3g007650	chr3	1103372..1108535	2.95967	-0.891179	-1.85469	1.38211e-05	0.000961642	0.697191
Medtr7g022870	chr7	complement(7421644..7430714)	39.0217	-0.450026	-1.36607	1.3803e-05	0.000961642	0.696276
Medtr6g009540	chr6	2841276..2843419	13.4836	0.736553	1.66619	1.44054e-05	0.00100092	0.726665
Medtr4g018880	chr4	complement(5831610..5833458)	179.8	-0.573478	-1.48811	1.44925e-05	0.00100558	0.731058
Medtr2g021255	chr2	complement(7202259..7207199)	97.4658	0.484478	1.39908	1.51694e-05	0.00105111	0.765205
Medtr7g078070	chr7	29503309..29506922	140.697	0.511146	1.42518	1.53383e-05	0.00106135	0.773728
Medtr2g010740	chr2	2503237..2506194	42.9298	-0.459321	-1.37489	1.62723e-05	0.00112444	0.820841
Medtr1g103110	chr1	complement(46647824..46648731)	4.0656	1.49309	2.81491	1.6379e-05	0.00113026	0.82622
Medtr5g085790	chr5	37060695..37063138	51.6943	-0.444367	-1.36072	1.6505e-05	0.0011374	0.83258
Medtr3g035830	chr3	complement(13284151..13286718)	0.838383	3.35552	10.2356	1.66962e-05	0.00114745	0.842223
Medtr5g059140	chr5	24404215..24409901	82.4192	-0.445287	-1.36159	1.66963e-05	0.00114745	0.842227
Medtr6g087320	chr6	complement(33280897..33288524)	4.66199	-0.615204	-1.53177	1.67281e-05	0.00114807	0.843831
Medtr2g091165	chr2	39295551..39297179	0.709199	5.62298	49.2816	1.69257e-05	0.00116006	0.853801
Medtr1g027260	chr1	complement(9006672..9007604)	1.24207	5.61957	49.1654	1.71459e-05	0.00117196	0.864905
Medtr6g038730	chr6	13890399..13893951	0.334766	5.62727	49.4284	1.7138e-05	0.00117196	0.864512
Medtr1g086970	chr1	complement(38926509..38927951)	0.618369	4.45532	21.9374	1.71973e-05	0.00117388	0.8675
Medtr1g056550	chr1	complement(24709062..24712400)	79.0537	-0.439671	-1.35629	1.73556e-05	0.00118309	0.875486
Medtr7g015710	chr7	complement(4880583..4885127)	21.6826	0.724618	1.65246	1.78099e-05	0.00121242	0.898402
Medtr2g040530	chr2	complement(17781499..17783230)	28.3171	-0.463934	-1.3793	1.83196e-05	0.00124543	0.924112
Medtr2g099175	chr2	42538896..42540742	90.0362	0.583909	1.49891	1.85652e-05	0.00126044	0.936505
Medtr6g027470	chr6	complement(9442695..9444643)	2.43359	-1.7825	-3.44023	1.90622e-05	0.00129244	0.961575
Medtr2g084120	chr2	complement(35329038..35332642)	8.42394	0.773368	1.70926	1.91658e-05	0.00129772	0.9668
Medtr2g010720	chr2	complement(2491485..2494094)	80.1356	-0.444576	-1.36091	1.9439e-05	0.00131094	0.980582
Medtr4g065007	chr4	complement(24342256..24346196)	13.6886	0.537035	1.45099	1.94089e-05	0.00131094	0.979061
Medtr5g055020	chr5	complement(22665201..22667429)	42.7076	0.476047	1.39093	1.94237e-05	0.00131094	0.979808
Medtr2g018670	chr2	5898541..5900322	29.8141	-0.606772	-1.52285	1.95712e-05	0.00131809	0.987248
Medtr5g095120	chr5	41569704..41573009	7.51278	-0.724909	-1.6528	1.97217e-05	0.00132646	0.994843
Medtr7g029540	chr7	complement(10620910..10622056)	1.82298	4.9996	31.9911	1.98591e-05	0.00133392	1
Medtr4g094328	chr4	37742025..37742908	1.9169	-2.99206	-7.9561	2.00596e-05	0.0013456	1
Medtr2g038675	chr2	complement(16909067..16915332)	4.99493	9.98107	1010.65	2.02938e-05	0.0013595	1
Medtr7g009780	chr7	complement(2235928..2239172)	138.944	-0.43245	-1.34952	2.07363e-05	0.0013873	1
Medtr4g057450	chr4	complement(21083030..21085982)	23.9984	0.7906	1.72979	2.11842e-05	0.00141539	1
Medtr1g073700	chr1	complement(32700293..32708616)	1.4604	1.0976	2.13999	2.13591e-05	0.0014233	1
Medtr3g100980	chr3	complement(46463743..46466493)	16.8212	0.475364	1.39027	2.13556e-05	0.0014233	1
Medtr5g023730	chr5	9424158..9429907	44.187	-0.443235	-1.35965	2.14198e-05	0.00142546	1
Medtr4g087925	chr4	34604354..34607909	5.88629	-0.677087	-1.59891	2.17761e-05	0.00144726	1
Medtr8g031430	chr8	11783092..11787090	238.179	-0.476945	-1.39179	2.18373e-05	0.00144942	1
Medtr3g071960	chr3	32322523..32329477	64.0175	0.533231	1.44717	2.20029e-05	0.00145682	1
Medtr6g034230	chr6	complement(11627579..11634598)	8.52313	-0.487777	-1.40228	2.20065e-05	0.00145682	1
Medtr4g126160	chr4	complement(52450424..52455247)	15.6519	0.605876	1.5219	2.28118e-05	0.00150815	1
Medtr5g058810	chr5	24281512..24288073	1.47095	-1.04233	-2.05955	2.29057e-05	0.00151238	1
Medtr5g004650	chr5	complement(55460..56229)	1.81009	2.23308	4.70138	2.33332e-05	0.00153859	1
Medtr4g093140	chr4	36958288..36961550	7.92376	-0.703004	-1.62789	2.35533e-05	0.00155063	1
Medtr7g013260	chr7	3798077..3801318	4.09896	-1.00361	-2.00501	2.35773e-05	0.00155063	1
Medtr7g092600	chr7	36727608..36730862	21.0206	0.633063	1.55085	2.37897e-05	0.00156256	1
Medtr2g010970	chr2	complement(2604577..2606042)	9.99669	0.789283	1.72822	2.38241e-05	0.00156279	1
Medtr4g124910	chr4	complement(51802639..51805326)	14.2974	0.643868	1.56251	2.39687e-05	0.00157023	1
Medtr7g084750	chr7	32708057..32710264	50.6341	0.453976	1.36981	2.42522e-05	0.00158674	1
Medtr4g094730	chr4	38855907..38858583	93.5215	-0.428894	-1.3462	2.49275e-05	0.00162881	1
Medtr8g040070	chr8	complement(14903050..14906449)	16.9256	0.649546	1.56867	2.54849e-05	0.00166308	1
Medtr7g096340	chr7	38654452..38656449	29.898	-0.532291	-1.44622	2.60899e-05	0.00170036	1
Medtr8g012865	chr8	3882196..3883099	25.2743	9.86742	934.09	2.62855e-05	0.0017109	1
Medtr1g027070	chr1	complement(8941424..8946260)	14.4016	-0.468267	-1.38345	2.6479e-05	0.00172127	1
Medtr6g034920	chr6	12210408..12213797	2323.54	-0.584887	-1.49992	2.66529e-05	0.00173035	1
Medtr4g097640	chr4	complement(40308638..40310809)	6.01897	9.8475	921.286	2.68331e-05	0.00173981	1
Medtr8g045555	chr8	complement(17812773..17814331)	9.69163	1.80173	3.48639	2.69659e-05	0.00174617	1
Medtr7g078680	chr7	29762570..29765948	60.2066	-0.43902	-1.35568	2.70732e-05	0.00175087	1
Medtr2g009500	chr2	complement(1937541..1941191)	15.2665	0.711909	1.63797	2.75951e-05	0.00178234	1
Medtr1g071040	chr1	31452900..31454806	37.4352	0.472925	1.38792	2.76992e-05	0.00178678	1
Medtr6g051680	chr6	17995138..17996261	4.769	1.26083	2.39633	2.80171e-05	0.00180498	1
Medtr1g101250	chr1	45512285..45515882	7.07524	-0.614815	-1.53136	2.87201e-05	0.0018479	1
Medtr0015s0130	scaffold0015	65972..69540	14.3702	0.861003	1.8163	2.88039e-05	0.00185093	1
Medtr5g006750	chr5	1057515..1059468	61.928	0.575792	1.4905	3.02647e-05	0.00194233	1
Medtr1g013050	chr1	complement(2810795..2814996)	67.7873	0.429471	1.34674	3.03465e-05	0.00194511	1
Medtr2g017470	chr2	5489251..5492319	8.8996	-0.622623	-1.53967	3.05479e-05	0.00195553	1
Medtr4g048190	chr4	complement(17035507..17044934)	6.5809	0.692011	1.61553	3.07983e-05	0.00196906	1
Medtr4g051738	chr4	complement(18727789..18731992)	7.80708	-0.645704	-1.5645	3.10603e-05	0.0019833	1
Medtr6g005330	chr6	complement(710480..711423)	249.879	-0.659413	-1.57944	3.12457e-05	0.00199262	1
Medtr8g079690	chr8	34166486..34170994	25.0836	0.518061	1.43203	3.13575e-05	0.00199722	1
Medtr7g086280	chr7	complement(33452025..33452672)	11.1563	9.81488	900.685	3.14808e-05	0.00200254	1
Medtr4g051682	chr4	complement(18674312..18679903)	8.22055	-0.584183	-1.49919	3.2121e-05	0.00204069	1
Medtr7g081020	chr7	30892633..30894709	31.4361	-0.459358	-1.37493	3.22043e-05	0.00204341	1
Medtr3g114900	chr3	complement(53659262..53665181)	3.4892	9.74519	858.212	3.27807e-05	0.00207501	1
Medtr0302s0030	scaffold0302	complement(14777..15385)	8.98368	9.7012	832.44	3.27846e-05	0.00207501	1
Medtr2g040690	chr2	17844560..17847487	2.44987	1.20912	2.31197	3.28684e-05	0.00207771	1
Medtr8g099185	chr8	complement(41712110..41714344)	99.7436	0.422201	1.33997	3.3058e-05	0.00208708	1
Medtr4g088150	chr4	34748355..34749132	66.5825	0.447412	1.36359	3.31427e-05	0.0020872	1
Medtr0328s0040	scaffold0328	complement(12609..15405)	4.28591	9.69609	829.493	3.31114e-05	0.0020872	1
Medtr6g021830	chr6	7544358..7544899	17.2648	-0.797507	-1.7381	3.33125e-05	0.00209528	1
Medtr7g093330	chr7	37082348..37083768	4.43347	9.71231	838.874	3.36049e-05	0.00211104	1
Medtr8g012860	chr8	3876501..3877335	23.4224	9.72178	844.396	3.36799e-05	0.00211312	1
Medtr4g109470	chr4	45477291..45481844	0.531325	3.476	11.1271	3.37795e-05	0.00211674	1
Medtr4g065107	chr4	complement(24476301..24477921)	22.5205	-0.533652	-1.44759	3.40017e-05	0.00212538	1
Medtr5g032910	chr5	complement(14180381..14183334)	27.7831	-0.445619	-1.3619	3.39763e-05	0.00212538	1
Medtr5g017260	chr5	6285069..6290691	18.851	0.560292	1.47457	3.40476e-05	0.00212561	1
Medtr2g103440	chr2	44534963..44535988	34.156	0.461255	1.37674	3.47825e-05	0.00216881	1
Medtr8g099995	chr8	42357887..42361951	23.4261	-0.44654	-1.36277	3.57634e-05	0.00222722	1
Medtr6g059650	chr6	complement(20460270..20461180)	179.07	0.586771	1.50188	3.62372e-05	0.00225394	1
Medtr0027s0260	scaffold0027	148270..149166	5.91229	9.65612	806.827	3.65182e-05	0.00226862	1
Medtr2g451260	chr2	22788446..22789589	90.9494	-0.577469	-1.49223	3.70137e-05	0.00229658	1
Medtr2g034470	chr2	complement(13151840..13153717)	134.646	-0.628409	-1.54586	3.77347e-05	0.00233844	1
Medtr4g052040	chr4	18829097..18830158	3.79273	1.28745	2.44096	3.80132e-05	0.00235281	1
Medtr3g062570	chr3	28267238..28275049	25.9712	-0.527962	-1.44189	3.86895e-05	0.00239173	1
Medtr7g029030	chr7	complement(10086567..10090989)	232.329	-0.444025	-1.36039	3.89087e-05	0.00240234	1
Medtr4g094495	chr4	38085612..38087364	39.7822	0.434998	1.35191	3.90774e-05	0.00240981	1
Medtr8g020610	chr8	7265753..7266654	78.5816	0.555658	1.46984	3.95569e-05	0.0024364	1
Medtr5g072980	chr5	complement(31052311..31054387)	38.3206	-0.528952	-1.44288	3.96494e-05	0.00243912	1
Medtr8g077890	chr8	complement(33161160..33163766)	0.561602	4.4324	21.5916	3.96992e-05	0.0024392	1
Medtr8g466500	chr8	complement(23729311..23734026)	4.4145	-0.900016	-1.86609	3.98037e-05	0.00244265	1
Medtr4g068290	chr4	complement(25604877..25606828)	5.01741	1.05263	2.0743	3.99361e-05	0.0024478	1
Medtr5g070680	chr5	complement(29930958..29933297)	40.8592	0.438024	1.35475	4.02041e-05	0.00246123	1
Medtr4g053635	chr4	19426355..19430829	2.57009	9.63607	795.697	4.08308e-05	0.00249657	1
Medtr8g463180	chr8	complement(22212599..22214467)	70.4604	-0.426112	-1.34361	4.11293e-05	0.00251177	1
Medtr6g082130	chr6	complement(30667452..30668025)	18.4509	-0.876907	-1.83643	4.16677e-05	0.00254158	1
Medtr1g085070	chr1	complement(37970461..37974426)	8.81663	0.740167	1.67037	4.17831e-05	0.00254247	1
Medtr2g076590	chr2	32063871..32065553	20.3114	0.599237	1.51492	4.17781e-05	0.00254247	1
Medtr3g062590	chr3	28282909..28290433	56.6315	-0.417768	-1.33586	4.18463e-05	0.00254325	1
Medtr7g056667	chr7	20292100..20295409	9.18238	-0.663353	-1.58376	4.18997e-05	0.00254343	1
Medtr2g460730	chr2	25049516..25052612	4.69383	9.60716	779.908	4.21011e-05	0.00255258	1
Medtr7g070940	chr7	26259279..26261446	37.0154	0.429948	1.34718	4.22199e-05	0.00255671	1
Medtr5g094830	chr5	complement(41447535..41454197)	69.6256	-0.484983	-1.39957	4.29969e-05	0.00260064	1
Medtr8g432510	chr8	complement(12289683..12294618)	38.0312	-0.424403	-1.34202	4.35249e-05	0.00262943	1
Medtr4g094812	chr4	39047486..39050309	86.2072	-0.426269	-1.34375	4.375e-05	0.00263986	1
Medtr5g030310	chr5	complement(12740156..12741696)	15.9665	1.04109	2.05778	4.424e-05	0.00266624	1
Medtr1g090150	chr1	40382849..40384473	24.948	-0.543577	-1.45758	4.47539e-05	0.00269399	1
Medtr4g086510	chr4	complement(33917615..33918936)	21.1206	0.568955	1.48345	4.4899e-05	0.00269951	1
Medtr7g063730	chr7	23276759..23278907	308.007	0.527883	1.44181	4.52844e-05	0.00271944	1
Medtr3g479490	chr3	complement(35753836..35760043)	15.8105	0.596678	1.51223	4.59116e-05	0.00275382	1
Medtr8g061950	chr8	complement(25866267..25867866)	42.484	0.58244	1.49738	4.60226e-05	0.0027572	1
Medtr6g488030	chr6	complement(33144107..33147777)	30.3539	-0.442504	-1.35896	4.61731e-05	0.00276294	1
Medtr1g095560	chr1	complement(42978855..42982654)	16.6024	0.550268	1.46436	4.66795e-05	0.00278993	1
Medtr0062s0060	scaffold0062	25600..26574	78.3307	0.556945	1.47115	4.70429e-05	0.00280832	1
Medtr8g463700	chr8	22469121..22469422	3.53675	5.52099	45.9182	4.78475e-05	0.00285298	1
Medtr2g031930	chr2	complement(12112690..12119126)	34.6865	0.549565	1.46364	4.83529e-05	0.00287971	1
Medtr3g075500	chr3	complement(34378914..34381451)	25.5818	0.452072	1.368	4.90616e-05	0.00291847	1
Medtr6g008820	chr6	2445602..2451800	2.24426	1.33247	2.51834	4.92881e-05	0.00292849	1
Medtr3g408340	chr3	complement(1432598..1436337)	33.8471	-0.583841	-1.49883	4.96296e-05	0.00294406	1
Medtr0491s0040	scaffold0491	complement(10052..10911)	2.61416	5.37635	41.5378	4.96669e-05	0.00294406	1
Medtr3g026290	chr3	complement(8094532..8095999)	14.1453	-0.623967	-1.54111	4.98625e-05	0.00295219	1
Medtr4g036310	chr4	complement(11855246..11857393)	9.48414	-0.775707	-1.71203	5.0135e-05	0.00296011	1
Medtr4g067150	chr4	complement(25326110..25327263)	0.669572	3.06805	8.38641	5.00606e-05	0.00296011	1
Medtr4g124000	chr4	51154399..51160624	51.019	-0.478709	-1.3935	5.01724e-05	0.00296011	1
Medtr5g014370	chr5	4823426..4824229	6.7048	0.948239	1.92952	5.16303e-05	0.00304257	1
Medtr5g084950	chr5	complement(36643552..36646799)	4.39019	1.07848	2.11182	5.2707e-05	0.00310239	1
Medtr2g023890	chr2	complement(8468817..8469988)	9.45265	0.794348	1.73429	5.32738e-05	0.0031321	1
Medtr5g068140	chr5	complement(28816383..28818056)	2.72933	9.44094	695.032	5.33363e-05	0.00313212	1
Medtr5g078020	chr5	33316456..33319384	27.3116	-0.622322	-1.53935	5.34305e-05	0.00313401	1
Medtr2g088900	chr2	37490665..37495477	5.68243	-0.79783	-1.73848	5.39413e-05	0.00316029	1
Medtr3g088750	chr3	40566019..40569461	11.6384	-0.589167	-1.50438	5.48983e-05	0.00320891	1
Medtr5g029820	chr5	complement(12546727..12547531)	48.3996	0.472626	1.38763	5.48526e-05	0.00320891	1
Medtr5g010350	chr5	complement(2753900..2755471)	0.94097	1.89113	3.70925	5.51444e-05	0.00321956	1
Medtr1g105480	chr1	complement(47480089..47482381)	189.365	0.638616	1.55683	5.53026e-05	0.00322507	1
Medtr1g036510	chr1	complement(13405715..13407848)	37.7404	-0.424574	-1.34218	5.56296e-05	0.00324039	1
Medtr4g108330	chr4	44937960..44942067	17.4182	0.641677	1.56014	5.57457e-05	0.00324341	1
Medtr8g093440	chr8	complement(39025942..39027454)	23.0396	-0.735222	-1.66465	5.63632e-05	0.00327556	1
Medtr4g071150	chr4	26827610..26828386	65.2727	0.434477	1.35142	5.67698e-05	0.00329539	1
Medtr8g089830	chr8	complement(37468615..37469575)	18.5726	0.760894	1.69454	5.70285e-05	0.0033066	1
Medtr1g106420	chr1	48276187..48277145	38.1402	0.732701	1.66175	5.84312e-05	0.00338404	1
Medtr2g055670	chr2	complement(23839867..23840725)	62.7625	-0.433873	-1.35085	6.14791e-05	0.00355497	1
Medtr2g100470	chr2	43172429..43176563	4.75852	-0.80012	-1.74125	6.15234e-05	0.00355497	1
Medtr8g074580	chr8	31536167..31538303	3.49058	9.38301	667.678	6.20282e-05	0.00358004	1
Medtr5g085900	chr5	37125563..37128450	145.127	0.412985	1.33144	6.23611e-05	0.00359514	1
Medtr3g076590	chr3	34426503..34429394	8.00014	0.678376	1.60034	6.26791e-05	0.00360934	1
Medtr8g073130	chr8	complement(30916813..30923547)	20.6344	-0.42713	-1.34456	6.31296e-05	0.00363114	1
Medtr5g024740	chr5	complement(9949393..9954836)	24.3115	-0.422093	-1.33987	6.34326e-05	0.00364441	1
Medtr0050s0240	scaffold0050	82469..84990	27.4073	0.579701	1.49454	6.36086e-05	0.00365036	1
Medtr3g067750	chr3	complement(30382606..30384596)	0.824537	3.9526	15.4829	6.38421e-05	0.0036596	1
Medtr3g008760	chr3	1650491..1651493	3.39173	1.44007	2.71334	6.42168e-05	0.00367274	1
Medtr8g059605	chr8	20993796..21004050	12.5269	-0.594644	-1.5101	6.41532e-05	0.00367274	1
Medtr2g042340	chr2	18471978..18473199	4.16309	2.26563	4.80864	6.45392e-05	0.003687	1
Medtr2g438720	chr2	complement(15654113..15660513)	17.0839	-0.562734	-1.47707	6.52934e-05	0.00371463	1
Medtr4g036150	chr4	complement(11802764..11803267)	71.0364	-0.564886	-1.47927	6.52278e-05	0.00371463	1
Medtr4g089155	chr4	complement(35791127..35796013)	3.54416	-0.997296	-1.99626	6.53834e-05	0.00371463	1
Medtr5g024680	chr5	complement(9916334..9921144)	39.6718	0.502989	1.41715	6.51059e-05	0.00371463	1
Medtr7g010580	chr7	2636906..2638623	104.364	0.418216	1.33627	6.53912e-05	0.00371463	1
Medtr7g117200	chr7	complement(48410617..48412319)	19.7693	-0.642503	-1.56104	6.56935e-05	0.00372761	1
Medtr5g083860	chr5	36189329..36191603	76.7578	-0.415152	-1.33344	6.63181e-05	0.00375882	1
Medtr5g092990	chr5	complement(40596848..40599167)	17.192	-0.456065	-1.37179	6.65219e-05	0.00376614	1
Medtr5g030870	chr5	13201639..13203100	71.0343	-0.423116	-1.34082	6.70205e-05	0.00379012	1
Medtr0807s0020	scaffold0807	3562..4708	46.7614	0.4282	1.34555	6.74985e-05	0.00381287	1
Medtr4g093110	chr4	36948097..36950385	14.784	-0.588768	-1.50396	7.02979e-05	0.00396517	1
Medtr7g028442	chr7	complement(9648314..9648666)	62.9779	-0.677424	-1.59928	7.03517e-05	0.00396517	1
Medtr1g100733	chr1	45666650..45667794	36.7574	-0.510204	-1.42425	7.11507e-05	0.00400572	1
Medtr6g045097	chr6	complement(15984600..15985432)	1.94109	2.09508	4.2725	7.14787e-05	0.0040197	1
Medtr1g066530	chr1	28559518..28560800	304.014	0.572874	1.48748	7.15701e-05	0.00402036	1
Medtr5g009780	chr5	2447611..2451302	2.29424	1.01613	2.02249	7.31718e-05	0.00410576	1
Medtr5g040430	chr5	17781983..17783604	465.805	-0.560589	-1.47487	7.34581e-05	0.00411724	1
Medtr4g124040	chr4	51195926..51202969	99.857	-0.44055	-1.35712	7.50718e-05	0.00420302	1
Medtr5g019050	chr5	complement(7174826..7177177)	21.8308	-0.426546	-1.34401	7.60062e-05	0.00425062	1
Medtr5g094730	chr5	41389584..41390668	24.4583	0.793298	1.73303	7.65052e-05	0.00427378	1
Medtr4g014540	chr4	4110878..4113850	369.608	-0.53083	-1.44476	7.69781e-05	0.00429544	1
Medtr5g092815	chr5	40536474..40538433	2.02375	1.64184	3.12064	7.70969e-05	0.00429732	1
Medtr7g082530	chr7	complement(31628340..31631549)	56.5905	-0.406176	-1.32517	7.7792e-05	0.00433128	1
Medtr5g048050	chr5	21036086..21037893	4.58536	-0.861297	-1.81667	7.83173e-05	0.00435572	1
Medtr6g088450	chr6	complement(32829828..32832832)	10.4412	-0.650415	-1.56962	7.85073e-05	0.0043588	1
Medtr7g025000	chr7	8279703..8280423	0.923786	3.18256	9.07919	7.85455e-05	0.0043588	1
Medtr4g061960	chr4	complement(22971677..22973895)	4.31635	0.975593	1.96645	8.04021e-05	0.00445693	1
Medtr3g464650	chr3	26001759..26003904	10.1115	-0.714164	-1.64053	8.0981e-05	0.00448409	1
Medtr1g102190	chr1	complement(46145257..46147559)	45.1374	0.415969	1.33419	8.16407e-05	0.00451566	1
Medtr1g031280	chr1	complement(10913585..10922440)	25.6929	-0.416111	-1.33433	8.26361e-05	0.00456571	1
Medtr7g057900	chr7	20945872..20947041	3.40754	9.24415	606.412	8.46489e-05	0.0046718	1
Medtr6g005360	chr6	complement(717382..718445)	315.277	-0.604004	-1.51993	8.48372e-05	0.00467708	1
Medtr4g097670	chr4	complement(40317945..40320935)	3.21261	9.2153	594.404	8.64567e-05	0.00476116	1
Medtr2g079630	chr2	complement(33540078..33542647)	44.5767	-0.609419	-1.52564	8.66118e-05	0.0047645	1
Medtr7g044920	chr7	complement(15107352..15108796)	66.6949	0.676527	1.59829	8.68953e-05	0.00477489	1
Medtr2g069020	chr2	complement(28672308..28675392)	10.0749	0.590748	1.50603	8.76095e-05	0.0048089	1
Medtr4g132350	chr4	complement(55307796..55310540)	1.71999	1.68567	3.21689	8.83888e-05	0.00484639	1
Medtr1g070120	chr1	complement(30799639..30802262)	9.95435	0.623937	1.54108	8.84901e-05	0.00484668	1
Medtr6g021850	chr6	7554120..7554641	10.7812	-0.879446	-1.83967	8.86018e-05	0.00484753	1
Medtr4g064005	chr4	23875068..23875767	49.8484	0.436167	1.353	9.03499e-05	0.00493782	1
Medtr2g450040	chr2	22061730..22065853	41.1437	-0.415057	-1.33335	9.1102e-05	0.00497354	1
Medtr7g100730	chr7	complement(40583319..40587552)	12.105	0.456839	1.37253	9.2259e-05	0.00502659	1
Medtr8g465990	chr8	complement(23559692..23563321)	5.50396	-0.651744	-1.57107	9.22731e-05	0.00502659	1
Medtr3g088855	chr3	40666331..40669639	13.9325	0.607838	1.52397	9.36241e-05	0.00509468	1
Medtr7g089730	chr7	complement(35144993..35146477)	3.9379	9.14457	565.967	9.45106e-05	0.00513738	1
Medtr5g093460	chr5	complement(40804416..40820316)	0.66351	2.45856	5.49669	9.47391e-05	0.00514426	1
Medtr3g054180	chr3	21488743..21489806	2.65607	2.01685	4.04699	9.5256e-05	0.00516677	1
Medtr3g007510	chr3	1046180..1051266	18.0111	-0.42092	-1.33878	9.53885e-05	0.0051684	1
Medtr1g030220	chr1	10478454..10482220	8.79311	-0.688453	-1.61155	9.55185e-05	0.00516989	1
Medtr6g005310	chr6	complement(702128..703167)	675.832	-0.586315	-1.50141	9.62727e-05	0.00520512	1
Medtr1g009240	chr1	1245198..1246195	5.31139	9.15981	571.974	9.69759e-05	0.00523753	1
Medtr3g082180	chr3	37092713..37096025	0.573663	3.31913	9.98061	9.84261e-05	0.00531016	1
Medtr3g063240	chr3	complement(28615502..28618298)	3.48395	9.1448	566.056	9.92317e-05	0.00534791	1
Medtr8g042910	chr8	complement(16607577..16610530)	26.5744	0.458491	1.3741	0.000100247	0.00539684	1
Medtr1g043200	chr1	complement(16173895..16175580)	6.00676	0.762442	1.69636	0.000100431	0.00540098	1
Medtr8g015940	chr8	5268830..5270028	100.114	-0.50832	-1.42239	0.00010236	0.00549888	1
Medtr4g105690	chr4	complement(43875281..43876760)	8.92031	0.671877	1.59314	0.000103066	0.00553092	1
Medtr2g088980	chr2	37530524..37531686	204.322	-0.463318	-1.37871	0.000103402	0.00553719	1
Medtr5g077580	chr5	33112485..33117232	0.969441	1.98411	3.95617	0.000103403	0.00553719	1
Medtr2g011170	chr2	2677200..2681013	12.6988	-0.505653	-1.41977	0.000104394	0.00558438	1
Medtr0391s0020	scaffold0391	7230..13590	0.73996	1.73195	3.32177	0.000106128	0.00567112	1
Medtr7g089080	chr7	complement(34800306..34806771)	10.7273	0.422595	1.34034	0.000108547	0.00579423	1
Medtr1g013130	chr1	complement(2866484..2867657)	37.1983	-0.422242	-1.34001	0.000109299	0.0058282	1
Medtr6g074650	chr6	complement(27599416..27604362)	8.39065	-0.561509	-1.47581	0.000112832	0.00601025	1
Medtr7g076990	chr7	complement(29071310..29071876)	6.11026	9.0414	526.904	0.000114983	0.00611835	1
Medtr7g099710	chr7	40003339..40007996	0.28317	3.22972	9.38083	0.000116452	0.00618999	1
Medtr7g063540	chr7	23171333..23171849	135.981	-0.406775	-1.32572	0.000118253	0.0062791	1
Medtr4g091850	chr4	36432757..36436681	3.78742	-0.705626	-1.63085	0.000119384	0.00633252	1
Medtr3g063950	chr3	complement(28771116..28776329)	19.9785	-0.518619	-1.43258	0.000121262	0.00642537	1
Medtr1g109200	chr1	complement(49363434..49366902)	171.085	0.51472	1.42872	0.000121597	0.00643636	1
Medtr1g093150	chr1	complement(33787293..33789663)	0.692049	5.17749	36.1892	0.000121831	0.00644196	1
Medtr6g033660	chr6	11001486..11003397	33.8845	-0.407682	-1.32655	0.000122768	0.00648474	1
Medtr6g471160	chr6	25481463..25490009	8.4356	-0.542704	-1.4567	0.000123426	0.00651266	1
Medtr7g096960	chr7	complement(38928456..38929027)	10.2833	0.928621	1.90346	0.000123843	0.00652786	1
Medtr4g070240	chr4	26433791..26434556	68.9199	0.41279	1.33126	0.000123974	0.00652794	1
Medtr5g026580	chr5	complement(10929432..10931445)	7.01182	0.690688	1.61405	0.000125514	0.00660211	1
Medtr3g009180	chr3	1829947..1834344	0.55835	3.24037	9.45039	0.000126112	0.00661979	1
Medtr4g123537	chr4	complement(51358738..51361285)	1.85761	9.0285	522.215	0.000126092	0.00661979	1
Medtr1g066380	chr1	28604011..28607006	31.9222	0.73788	1.66772	0.000126446	0.00663038	1
Medtr8g040080	chr8	14917344..14917700	70.3059	-0.612156	-1.52854	0.000126894	0.00664696	1
Medtr6g466310	chr6	23784601..23786459	1.87792	-4.48625	-22.4128	0.000128946	0.00674748	1
Medtr2g073560	chr2	complement(31195611..31202422)	4.92	-0.73	-1.65864	0.000129931	0.00679196	1
Medtr1g096270	chr1	complement(43337297..43341065)	21.9237	-0.40289	-1.32215	0.000130379	0.00680832	1
Medtr8g093010	chr8	complement(38864752..38865426)	9.64284	-0.782596	-1.72022	0.000131659	0.00686807	1
Medtr3g070500	chr3	complement(31631615..31635225)	9.88031	0.667492	1.58831	0.000132553	0.0069049	1
Medtr3g109490	chr3	complement(50639963..50643082)	227.205	-0.534371	-1.44831	0.000132639	0.0069049	1
Medtr4g059630	chr4	21991918..21993963	48.2677	0.516964	1.43094	0.000133787	0.00695747	1
Medtr5g027970	chr5	complement(11683023..11688958)	31.3657	-0.394622	-1.3146	0.000133968	0.00695971	1
Medtr1g062660	chr1	complement(27432301..27433418)	7.70959	-0.958746	-1.94362	0.000135349	0.00701866	1
Medtr3g041560	chr3	complement(14894266..14897229)	14.5622	-0.505157	-1.41928	0.000135381	0.00701866	1
Medtr4g053120	chr4	complement(19228071..19231223)	52.2028	0.40807	1.32691	0.000135698	0.00702789	1
Medtr5g026640	chr5	10980286..10985324	8.65822	0.743341	1.67405	0.000136055	0.00703913	1
Medtr3g084620	chr3	complement(38213808..38215025)	21.5311	0.605545	1.52155	0.000136753	0.007068	1
Medtr6g072010	chr6	26686547..26691368	2.62663	1.08204	2.11703	0.000137096	0.00707849	1
Medtr5g014400	chr5	4830733..4831488	4.37583	8.97474	503.115	0.000137305	0.00708202	1
Medtr3g074610	chr3	33724920..33727721	29.6504	-0.414939	-1.33324	0.000137551	0.00708748	1
Medtr8g464300	chr8	complement(22717548..22720266)	11.4953	0.604622	1.52058	0.000138561	0.00713219	1
Medtr5g011060	chr5	complement(3117305..3121525)	2.86294	0.974708	1.96524	0.000142656	0.00733551	1
Medtr5g090630	chr5	complement(39462805..39464963)	11.0542	0.594115	1.50955	0.000143174	0.00735465	1
Medtr3g104660	chr3	complement(48235363..48238927)	1.01526	1.61056	3.0537	0.000145522	0.00746766	1
Medtr2g039910	chr2	17491443..17495191	15.2848	-0.421797	-1.3396	0.000145998	0.00748446	1
Medtr4g111975	chr4	46325032..46326931	0.93529	1.86137	3.63353	0.000146454	0.00750022	1
Medtr4g051698	chr4	complement(18696120..18699800)	19.3623	-0.603482	-1.51938	0.000147755	0.00755916	1
Medtr2g045490	chr2	complement(19977155..19981600)	3.96727	0.748203	1.6797	0.000148357	0.00756694	1
Medtr3g049390	chr3	complement(18389424..18389858)	7.41131	8.93784	490.407	0.000148062	0.00756694	1
Medtr8g078910	chr8	33631826..33632321	3.45665	2.98175	7.89943	0.000148349	0.00756694	1
Medtr1g026020	chr1	complement(8373566..8375989)	35.8013	0.406622	1.32558	0.000149453	0.00760526	1
Medtr2g090190	chr2	complement(38268711..38272451)	14.2116	0.432804	1.34985	0.00014952	0.00760526	1
Medtr8g057020	chr8	18839169..18845710	7.80648	0.618354	1.53512	0.00014956	0.00760526	1
Medtr1g017830	chr1	5066497..5067776	80.8914	-0.393513	-1.31359	0.000150004	0.00762013	1
Medtr1g066710	chr1	28662551..28664189	22.9197	-0.608275	-1.52444	0.000150459	0.00763559	1
Medtr6g026830	chr6	complement(9059190..9059582)	8.89369	-1.22922	-2.3444	0.000151939	0.00770294	1
Medtr2g094160	chr2	40157717..40163066	50.0853	0.539589	1.45356	0.000153214	0.00775975	1
Medtr0062s0090	scaffold0062	35847..36998	41.493	0.800918	1.74221	0.00015495	0.0078398	1
Medtr6g014040	chr6	4513529..4515256	2.12819	8.88231	471.892	0.000156359	0.00790319	1
Medtr4g120760	chr4	complement(49999676..50001780)	141.007	-0.386941	-1.30762	0.000156526	0.00790368	1
Medtr2g084535	chr2	35695914..35701181	0.775507	1.86851	3.65154	0.000156743	0.00790675	1
Medtr8g445800	chr8	complement(17480936..17498034)	24.4708	-0.531557	-1.44549	0.00015851	0.00798789	1
Medtr2g102267	chr2	44039290..44042383	28.2796	-0.593665	-1.50908	0.00015889	0.00799905	1
Medtr0071s0030	scaffold0071	17492..31087	0.551114	5.89724	59.5998	0.000159075	0.00800038	1
Medtr4g121860	chr4	complement(50279153..50281279)	62.4838	-0.398231	-1.31789	0.000160056	0.00804169	1
Medtr5g071360	chr5	complement(30271009..30276614)	355.407	0.575077	1.48976	0.000160241	0.008043	1
Medtr2g009450	chr2	complement(1915096..1915715)	81.3124	-0.406865	-1.3258	0.00016239	0.00814273	1
Medtr8g103245	chr8	complement(43479451..43480135)	89.0339	0.481952	1.39663	0.000163442	0.00818734	1
Medtr1g025340	chr1	8086924..8092881	15.8773	-0.541656	-1.45564	0.000164146	0.00821448	1
Medtr6g018300	chr6	7006187..7007659	2.30253	4.90095	29.8766	0.000165204	0.00825921	1
Medtr1g075200	chr1	complement(33249759..33253864)	16.7762	-0.541888	-1.45588	0.000166914	0.00832186	1
Medtr4g013385	chr4	complement(3844555..3845568)	1192.04	-0.490151	-1.40459	0.000166952	0.00832186	1
Medtr4g092515	chr4	complement(36670425..36670944)	12.6227	0.974903	1.96551	0.000166813	0.00832186	1
Medtr7g112000	chr7	complement(46037836..46041191)	84.5828	-0.383602	-1.3046	0.000170818	0.00850616	1
Medtr4g121080	chr4	complement(50128943..50134104)	55.9165	-0.386887	-1.30757	0.000172826	0.00859768	1
Medtr1g076540	chr1	complement(34124178..34131509)	29.3828	0.39555	1.31544	0.00017399	0.00864705	1
Medtr0013s0230	scaffold0013	complement(88191..102409)	3.15804	0.765805	1.70032	0.000174763	0.0086769	1
Medtr1g492910	chr1	41670194..41670930	41.4035	0.423599	1.34127	0.000175037	0.00868198	1
Medtr2g029560	chr2	11095109..11098486	255.78	-0.528376	-1.44231	0.000176051	0.00872369	1
Medtr3g118020	chr3	complement(55227972..55230529)	18.4078	-0.54365	-1.45766	0.00017662	0.00874329	1
Medtr3g116510	chr3	complement(54501777..54507345)	4.67826	0.681995	1.60436	0.000177325	0.00876959	1
Medtr6g015875	chr6	5547932..5552304	38.6107	-0.395988	-1.31584	0.000179256	0.00884775	1
Medtr8g070115	chr8	complement(29784031..29787195)	13.6358	0.661788	1.58204	0.000179121	0.00884775	1
Medtr2g102010	chr2	complement(43891839..43893701)	2.9556	8.84456	459.702	0.000179639	0.00885798	1
Medtr2g007250	chr2	875474..913892	4.81328	-0.561744	-1.47605	0.000180186	0.00887629	1
Medtr4g094285	chr4	37609316..37613573	24.2215	0.395598	1.31549	0.000181861	0.00895005	1
Medtr1g014120	chr1	complement(3114127..3115335)	52.3974	0.408305	1.32713	0.00018253	0.00897421	1
Medtr1g112050	chr1	complement(50662165..50664256)	390.362	0.512143	1.42617	0.000184082	0.00904173	1
Medtr7g077190	chr7	complement(29147120..29147788)	2.12049	-2.02845	-4.07965	0.000187859	0.00921823	1
Medtr1g027040	chr1	8925788..8927830	12.6781	-0.556573	-1.47077	0.00018905	0.00924971	1
Medtr3g110405	chr3	complement(51588895..51591862)	17.6255	0.448633	1.36475	0.000188779	0.00924971	1
Medtr4g063100	chr4	complement(23343932..23345888)	132.973	-0.378594	-1.30007	0.000188916	0.00924971	1
Medtr4g093580	chr4	complement(37134680..37137945)	17.4246	-0.416534	-1.33472	0.000192095	0.0093896	1
Medtr7g102870	chr7	complement(41321730..41325306)	1.9939	8.82344	453.022	0.000193302	0.00943942	1
Medtr7g093820	chr7	complement(37316491..37317538)	37.4267	-0.572867	-1.48748	0.000198943	0.00970551	1
Medtr8g022810	chr8	complement(8098448..8102108)	69.4176	-0.386036	-1.3068	0.000201663	0.0098287	1
Medtr4g035220	chr4	complement(12069732..12073031)	5.08425	8.76869	436.154	0.000202476	0.00985876	1
Medtr3g036335	chr3	13497306..13498493	2.38779	8.75348	431.578	0.000202811	0.00986558	1
Medtr5g049280	chr5	21601058..21603715	43.6417	-0.394264	-1.31427	0.000203671	0.00989788	1
Medtr8g011780	chr8	complement(3227386..3229181)	18.3017	-0.444698	-1.36103	0.000205163	0.00996077	1
Medtr5g022010	chr5	complement(8620324..8622022)	21.6989	0.462468	1.3779	0.000207457	0.0100625	1
Medtr2g078960	chr2	33059916..33064979	8.1317	-0.580711	-1.49559	0.000208593	0.0101079	1
Medtr7g088790	chr7	complement(34644617..34648929)	2.24823	1.01577	2.02198	0.000210105	0.0101713	1
Medtr8g090315	chr8	complement(37962012..37963076)	67.5094	0.393135	1.31324	0.000210625	0.0101867	1
Medtr1g040545	chr1	15009292..15012620	10.4745	-0.587751	-1.5029	0.000211967	0.0102418	1
Medtr3g437870	chr3	complement(12922696..12930672)	86.3704	-0.453945	-1.36978	0.000212921	0.0102781	1
Medtr3g019500	chr3	complement(5487522..5491540)	14.9566	-0.475671	-1.39056	0.000213723	0.0102971	1
Medtr6g038230	chr6	13692779..13694798	4.11309	0.927238	1.90163	0.000213697	0.0102971	1
Medtr0242s0060	scaffold0242	complement(22283..23586)	7.89052	-0.875581	-1.83475	0.000216045	0.010399	1
Medtr3g077640	chr3	34908806..34913557	57.6827	0.381467	1.30267	0.000217032	0.0104319	1
Medtr7g026170	chr7	complement(8666356..8668656)	0.438996	5.12492	34.8944	0.000217142	0.0104319	1
Medtr4g104410	chr4	43205970..43207166	1.15413	2.27877	4.85265	0.000222369	0.0106729	1
Medtr0197s0100	scaffold0197	30698..31571	8.17567	0.845961	1.79746	0.00022482	0.0107803	1
Medtr1g101130	chr1	complement(45451967..45455016)	42.0018	0.387309	1.30795	0.000225545	0.0108048	1
Medtr1g033480	chr1	complement(12076381..12080774)	22.7615	0.418594	1.33662	0.000228422	0.0109322	1
Medtr5g007550	chr5	complement(1406233..1408464)	188.949	-0.476574	-1.39144	0.000230906	0.0110406	1
Medtr2g035850	chr2	15214004..15215247	43.951	-0.394828	-1.31479	0.000231689	0.0110675	1
Medtr2g071860	chr2	30028381..30033929	1.08099	-1.07675	-2.10927	0.000232388	0.0110904	1
Medtr4g057500	chr4	21055428..21057903	56.0295	-0.380458	-1.30176	0.000234163	0.0111646	1
Medtr4g049550	chr4	17431937..17432610	3.95923	8.66475	405.836	0.000236592	0.0112697	1
Medtr8g042870	chr8	complement(16586144..16591006)	0.9235	1.71176	3.2756	0.000236987	0.0112779	1
Medtr8g090210	chr8	complement(37846984..37850857)	6.83564	0.625328	1.54256	0.000237704	0.0113014	1
Medtr1g080510	chr1	complement(35849418..35850074)	43.8465	-0.531616	-1.44555	0.000240096	0.0113936	1
Medtr5g035430	chr5	complement(15405451..15407370)	8.91393	0.915425	1.88613	0.000240089	0.0113936	1
Medtr3g101400	chr3	46676569..46678619	7.86403	-0.701755	-1.62648	0.000240697	0.0114114	1
Medtr3g093430	chr3	complement(42689173..42696248)	47.3134	0.54542	1.45944	0.000244082	0.011561	1
Medtr2g034280	chr2	complement(13092471..13094204)	6.50912	0.648435	1.56747	0.000244926	0.0115792	1
Medtr3g113210	chr3	52912762..52915110	11.6604	0.585524	1.50058	0.000244872	0.0115792	1
Medtr2g072190	chr2	30330475..30335065	25.8398	0.514582	1.42858	0.000245995	0.0116189	1
Medtr5g023790	chr5	complement(9468202..9472333)	8.99423	0.431981	1.34909	0.000248309	0.0117172	1
Medtr4g063410	chr4	complement(23423177..23423893)	39.3753	0.417172	1.33531	0.000248639	0.0117173	1
Medtr6g092840	chr6	complement(34969935..34974748)	5.39954	0.71238	1.6385	0.000248775	0.0117173	1
Medtr8g466490	chr8	complement(23720704..23728994)	5.75252	-0.802016	-1.74354	0.000250196	0.0117732	1
Medtr5g029100	chr5	12157562..12161692	130.234	-0.372458	-1.29456	0.000254714	0.0119657	1
Medtr6g082920	chr6	30983289..30985412	1.31131	-5.92111	-60.5943	0.000254761	0.0119657	1
Medtr8g068040	chr8	28336940..28337728	3.2705	8.61678	392.562	0.000255075	0.0119693	1
Medtr6g022790	chr6	complement(7976351..7981977)	108.751	-0.372172	-1.2943	0.000255855	0.0119947	1
Medtr8g099245	chr8	complement(41763694..41765566)	77.9645	0.427215	1.34464	0.000257511	0.0120612	1
Medtr1g044470	chr1	16789129..16789548	43.5239	-0.646674	-1.56556	0.000258558	0.0120878	1
Medtr3g437340	chr3	12674189..12687917	11.9651	0.664306	1.58481	0.000258557	0.0120878	1
Medtr8g019330	chr8	6786305..6788531	2.8098	-1.08484	-2.12113	0.000265513	0.0124014	1
Medtr4g018820	chr4	complement(5810481..5812248)	95.3142	0.767442	1.70225	0.000265799	0.0124033	1
Medtr7g024730	chr7	8154269..8157419	0.715565	3.3031	9.87032	0.000267889	0.0124893	1
Medtr3g462220	chr3	24832582..24834600	2.71547	1.3779	2.5989	0.000268498	0.0125061	1
Medtr2g049020	chr2	complement(21558019..21563031)	2.48427	0.902003	1.86866	0.000270075	0.0125679	1
Medtr7g080550	chr7	complement(30657610..30658542)	44.6092	0.398473	1.31811	0.000272559	0.0126719	1
Medtr2g436880	chr2	complement(14418255..14419086)	174.656	-0.479233	-1.394	0.000273788	0.0127056	1
Medtr0059s0170	scaffold0059	complement(61740..63732)	5.60508	0.728406	1.65681	0.000273726	0.0127056	1
Medtr4g115690	chr4	47810138..47811531	104.073	-0.372909	-1.29496	0.000280414	0.0130011	1
Medtr2g438540	chr2	complement(15580053..15581227)	6.28439	1.62062	3.07507	0.000283129	0.0131098	1
Medtr8g075260	chr8	complement(31815891..31818432)	15.2085	0.414569	1.3329	0.000283279	0.0131098	1
Medtr3g013980	chr3	complement(3851224..3851618)	11.7947	-0.859587	-1.81452	0.000285259	0.0131894	1
Medtr2g009220	chr2	complement(1828042..1832844)	13.9446	0.557641	1.47186	0.000288265	0.0132918	1
Medtr2g010710	chr2	complement(2487965..2489831)	41.3982	-0.387969	-1.30855	0.000288231	0.0132918	1
Medtr5g075650	chr5	complement(32189120..32198091)	41.5038	-0.54271	-1.45671	0.000288064	0.0132918	1
Medtr2g099010	chr2	complement(42407677..42410072)	35.2084	-0.524624	-1.43856	0.000295562	0.0136065	1
Medtr5g072930	chr5	complement(31038885..31040934)	258.63	-0.410094	-1.32877	0.000295629	0.0136065	1
Medtr1g070170	chr1	30841690..30845031	7.50778	0.561194	1.47549	0.000296205	0.0136206	1
Medtr4g045990	chr4	16005184..16005972	75.7385	-0.620088	-1.53697	0.000297665	0.0136753	1
Medtr8g104200	chr8	43876359..43883692	6.31647	-0.526667	-1.4406	0.000299556	0.0137496	1
Medtr7g107520	chr7	complement(43859568..43861413)	58.6518	0.53035	1.44428	0.00030041	0.0137763	1
Medtr4g086620	chr4	33947782..33949397	29.536	-0.513599	-1.42761	0.000302261	0.0138485	1
Medtr3g018920	chr3	5234891..5237916	1.33302	3.27466	9.67766	0.000307599	0.0140714	1
Medtr4g081130	chr4	complement(31406252..31409158)	246.064	0.58265	1.4976	0.000307683	0.0140714	1
Medtr2g008226	chr2	1356907..1358554	11.845	0.541153	1.45513	0.000309192	0.0141276	1
Medtr2g039120	chr2	17123514..17129997	66.0639	0.446849	1.36306	0.000313768	0.0143237	1
Medtr3g074040	chr3	33405320..33408251	55.855	0.384787	1.30567	0.000315013	0.0143675	1
Medtr7g490350	chr7	35501372..35504301	12.3032	0.628034	1.54546	0.000316817	0.0144368	1
Medtr3g437990	chr3	12978184..12986453	74.3857	-0.364674	-1.28759	0.000322125	0.014642	1
Medtr3g074830	chr3	33810738..33811775	236.079	-0.471104	-1.38617	0.000322191	0.014642	1
Medtr8g095040	chr8	complement(39724297..39727091)	6.88921	0.684321	1.60695	0.000321875	0.014642	1
Medtr2g063823	chr2	26977730..26980254	1.04654	1.51292	2.85387	0.000325991	0.0148013	1
Medtr7g101425	chr7	40956141..40960002	14.5842	0.396617	1.31642	0.000328586	0.0149057	1
Medtr4g014160	chr4	3932753..3935911	11.7598	-0.540749	-1.45473	0.000331278	0.0150144	1
Medtr1g021630	chr1	complement(6502386..6507333)	0.788863	1.68879	3.22387	0.000332521	0.0150572	1
Medtr1g094960	chr1	42729587..42732600	6.50354	0.554759	1.46892	0.000333503	0.0150881	1
Medtr8g086070	chr8	35724954..35729888	91.6066	0.368519	1.29103	0.000334222	0.0151071	1
Medtr3g063310	chr3	28678557..28679754	136.9	-0.387707	-1.30831	0.000335131	0.0151346	1
Medtr4g022570	chr4	complement(7532569..7537988)	96.224	-0.369764	-1.29214	0.000336332	0.0151753	1
Medtr4g103800	chr4	42939312..42944040	73.8246	0.370211	1.29254	0.000340672	0.0153574	1
Medtr6g472370	chr6	complement(26157285..26159045)	3.30233	-2.04247	-4.11952	0.000341588	0.0153849	1
Medtr6g033330	chr6	complement(10660606..10667227)	38.5713	-0.400491	-1.31996	0.000342916	0.0154309	1
Medtr1g086390	chr1	38659765..38662894	8.82415	-0.609609	-1.52585	0.000343814	0.0154386	1
Medtr3g052330	chr3	20712143..20713744	64.3918	-0.376307	-1.29802	0.000344006	0.0154386	1
Medtr5g005370	chr5	383296..389075	42.4669	-0.386672	-1.30737	0.000343978	0.0154386	1
Medtr8g102190	chr8	complement(42976603..42981094)	7.9395	-0.487675	-1.40218	0.000349305	0.0156625	1
Medtr4g101950	chr4	42187439..42190474	21.1304	0.467319	1.38254	0.000349987	0.0156792	1
Medtr1g115345	chr1	52052229..52053348	67.5431	-0.37594	-1.29769	0.000351874	0.0157358	1
Medtr5g041095	chr5	18051970..18053262	49.0563	0.463391	1.37878	0.000351588	0.0157358	1
Medtr6g049260	chr6	17853341..17854883	15.9598	0.730172	1.65884	0.000352441	0.0157471	1
Medtr2g088590	chr2	37345172..37346774	7.08516	-0.637211	-1.55532	0.000354478	0.0158102	1
Medtr3g058220	chr3	complement(23023886..23026030)	11.2161	0.467521	1.38273	0.000354438	0.0158102	1
Medtr4g087440	chr4	34328476..34331741	50.6077	0.371358	1.29357	0.000361617	0.0161143	1
Medtr2g064405	chr2	complement(27307303..27312209)	13.759	0.613089	1.52953	0.000363112	0.0161667	1
Medtr3g005520	chr3	241218..242071	134.717	-0.368481	-1.29099	0.000364441	0.0162115	1
Medtr7g025820	chr7	complement(8600983..8602925)	0.347663	3.94119	15.3608	0.000367229	0.0163211	1
Medtr4g094560	chr4	complement(38236621..38240039)	106.625	-0.432524	-1.34959	0.000368842	0.0163784	1
Medtr3g026230	chr3	8071585..8072855	45.2433	-0.380449	-1.30175	0.000369844	0.0164085	1
Medtr2g045240	chr2	19868298..19870717	1.88941	3.97664	15.743	0.000372844	0.016527	1
Medtr3g082440	chr3	complement(37210178..37216257)	19.1778	-0.385921	-1.30669	0.000375358	0.0166238	1
Medtr7g085260	chr7	32990543..32992707	80.2836	-0.365596	-1.28841	0.000378787	0.016761	1
Medtr8g099495	chr8	42002556..42004293	27.977	-0.385237	-1.30607	0.000387052	0.0171117	1
Medtr8g089920	chr8	37547835..37548284	67.4001	-0.453124	-1.369	0.000389006	0.017183	1
Medtr8g075950	chr8	32125040..32126711	36.8043	0.38271	1.30379	0.000390894	0.0172513	1
Medtr5g020570	chr5	7872415..7877255	23.3716	-0.445733	-1.36201	0.000392164	0.0172922	1
Medtr1g018760	chr1	complement(5478973..5481406)	138.165	0.360944	1.28427	0.000394396	0.017371	1
Medtr3g052790	chr3	20895915..20902043	4.43706	-0.701908	-1.62665	0.000394639	0.017371	1
Medtr3g067437	chr3	complement(30055558..30056664)	5.7766	0.806773	1.74929	0.000395287	0.0173844	1
Medtr7g112440	chr7	complement(46226580..46227282)	2.43334	2.0285	4.07979	0.000396572	0.0174257	1
Medtr7g055630	chr7	complement(19058453..19059709)	109.057	-0.482549	-1.39721	0.00039958	0.0175426	1
Medtr7g113050	chr7	complement(46529663..46532464)	55.6873	0.368375	1.2909	0.000400031	0.0175471	1
Medtr5g005950	chr5	complement(688137..688709)	3.75195	8.35355	327.092	0.00040076	0.0175638	1
Medtr4g109610	chr4	complement(45562196..45564704)	63.1203	0.385617	1.30642	0.000401179	0.0175669	1
Medtr1g014150	chr1	complement(3098026..3099896)	3.89188	8.40602	339.206	0.000402101	0.017592	1
Medtr5g073960	chr5	complement(31415207..31416735)	2.6196	0.90729	1.87552	0.000405184	0.0177115	1
Medtr1g010210	chr1	1806316..1808831	76.2646	-0.363253	-1.28632	0.000405966	0.017715	1
Medtr3g109760	chr3	complement(51332152..51334611)	9.07254	0.630953	1.54859	0.000405859	0.017715	1
Medtr7g105400	chr7	complement(42745444..42749092)	1.38773	8.31214	317.837	0.000407182	0.0177527	1
Medtr2g090385	chr2	38516173..38517313	17.1897	0.511135	1.42517	0.000407646	0.0177576	1
Medtr3g091340	chr3	complement(41546916..41550030)	11.4475	0.405721	1.32475	0.000410009	0.0178451	1
Medtr4g123990	chr4	51143266..51149966	94.1138	-0.455984	-1.37172	0.000410612	0.0178559	1
Medtr4g044463	chr4	complement(15130088..15131171)	12.208	0.629729	1.54727	0.000415672	0.0180449	1
Medtr7g025130	chr7	8321958..8323227	31.5885	0.439266	1.35591	0.000415417	0.0180449	1
Medtr2g036440	chr2	15772197..15773551	6.03321	0.802708	1.74437	0.000416319	0.0180521	1
Medtr7g023690	chr7	complement(7739073..7740066)	632.251	-0.574452	-1.48911	0.000416555	0.0180521	1
Medtr2g031490	chr2	11820598..11822452	46.7626	-0.368448	-1.29096	0.000422572	0.0182815	1
Medtr4g103760	chr4	complement(42908965..42913622)	21.0356	-0.45403	-1.36986	0.000422366	0.0182815	1
Medtr2g024290	chr2	complement(8731579..8740090)	33.653	0.370637	1.29292	0.000424624	0.0183545	1
Medtr3g082700	chr3	complement(37314116..37316399)	110.019	-0.357865	-1.28153	0.000425205	0.0183639	1
Medtr4g082550	chr4	32092252..32093271	120.906	-0.426137	-1.34363	0.000425822	0.0183748	1
Medtr2g019250	chr2	complement(6235284..6236207)	432.281	-0.561762	-1.47607	0.000427512	0.018432	1
Medtr7g062950	chr7	complement(22896544..22898807)	9.82376	-0.495211	-1.40953	0.00043044	0.0185424	1
Medtr4g117020	chr4	complement(48467032..48471237)	2.35773	-0.905902	-1.87372	0.000431227	0.0185604	1
Medtr8g072210	chr8	30490402..30496365	1.6351	-0.898789	-1.8645	0.000432086	0.0185815	1
Medtr2g011270	chr2	complement(2716165..2721362)	2.74139	-0.809876	-1.75306	0.000432586	0.0185872	1
Medtr5g037950	chr5	complement(16577587..16578974)	10.627	0.941865	1.92101	0.000435052	0.0186773	1
Medtr7g012020	chr7	complement(3358843..3362212)	104.221	-0.357251	-1.28098	0.000437266	0.0187563	1
Medtr8g099655	chr8	complement(42154609..42155630)	9.02726	0.666036	1.58671	0.000438758	0.0188044	1
Medtr3g109950	chr3	50746552..50751238	42.0981	-0.363229	-1.2863	0.000441084	0.018888	1
Medtr3g035840	chr3	13288800..13292283	6.20219	0.538708	1.45267	0.000451239	0.0193064	1
Medtr5g044160	chr5	19413443..19417374	47.2365	0.370344	1.29266	0.000452286	0.0193349	1
Medtr1g086450	chr1	38681743..38682465	21.2349	-0.583316	-1.49829	0.000458757	0.0195949	1
Medtr4g109020	chr4	45200284..45202032	8.79215	0.596118	1.51164	0.000465437	0.0198579	1
Medtr0212s0040	scaffold0212	complement(13616..16439)	3.29311	0.74058	1.67085	0.000465703	0.0198579	1
Medtr8g081530	chr8	35174635..35175473	13.7342	0.623539	1.54065	0.000468318	0.0199525	1
Medtr6g082190	chr6	complement(30686744..30688594)	21.521	0.57852	1.49332	0.000470211	0.0200163	1
Medtr1g017390	chr1	4833343..4839399	22.9333	0.376336	1.29804	0.000472771	0.0201083	1
Medtr6g004230	chr6	complement(199282..200017)	39.8371	-0.39573	-1.31561	0.000476932	0.0202682	1
Medtr7g076970	chr7	complement(29068848..29069431)	3.31999	8.20413	294.91	0.000480435	0.0203999	1
Medtr7g082180	chr7	31482984..31485168	8.80452	0.568032	1.4825	0.000481883	0.0204442	1
Medtr4g087980	chr4	51523690..51527098	44.0669	0.363425	1.28648	0.000485891	0.0205969	1
Medtr8g023150	chr8	complement(8291098..8294972)	38.7882	0.364175	1.28715	0.000488361	0.0206842	1
Medtr1g475240	chr1	33263693..33269751	0.616047	8.16475	286.968	0.000489522	0.020716	1
Medtr1g078050	chr1	complement(34904633..34911997)	1.84854	-0.799427	-1.74041	0.000491945	0.0208011	1
Medtr7g094770	chr7	complement(37810347..37814299)	1.59242	-2.52653	-5.76183	0.000501189	0.0211742	1
Medtr4g023040	chr4	complement(7751200..7755936)	6.63896	-0.546566	-1.4606	0.00050207	0.0211937	1
Medtr3g114780	chr3	complement(53586058..53587839)	66.5756	0.359222	1.28273	0.000503335	0.0212293	1
Medtr4g027040	chr4	9303205..9306240	10.657	-0.389557	-1.30999	0.000508644	0.0214353	1
Medtr5g044680	chr5	complement(19604867..19608408)	4.45022	-0.568108	-1.48258	0.000510999	0.0215165	1
Medtr1g066860	chr1	28735501..28737426	99.4631	0.364888	1.28778	0.000514265	0.021636	1
Medtr7g090230	chr7	complement(35419657..35421312)	2.79288	0.848293	1.80037	0.000515256	0.0216596	1
Medtr7g105870	chr7	complement(42989209..42990385)	407.221	-0.429701	-1.34695	0.000517121	0.0217199	1
Medtr6g010810	chr6	2982266..2983663	10.4774	0.565829	1.48024	0.000520045	0.0218246	1
Medtr1g077030	chr1	complement(34373672..34375514)	131.467	-0.356566	-1.28037	0.000520869	0.021841	1
Medtr4g094332	chr4	complement(37751658..37752707)	8.75322	-0.715274	-1.6418	0.000525016	0.0219966	1
Medtr5g091050	chr5	39675490..39677929	11.5524	0.572137	1.48672	0.000527157	0.022068	1
Medtr5g083360	chr5	complement(35990105..35994097)	25.5136	-0.371909	-1.29406	0.000530553	0.0221917	1
Medtr4g127790	chr4	complement(53125507..53128791)	10.6079	-0.542102	-1.45609	0.0005316	0.0222171	1
Medtr2g008430	chr2	1471885..1475400	8.77831	0.633754	1.5516	0.000536664	0.0224102	1
Medtr4g107440	chr4	44453747..44465290	23.4078	0.41921	1.3372	0.000538819	0.0224815	1
Medtr6g080440	chr6	complement(30347740..30350780)	40.1855	-0.406006	-1.32501	0.00054017	0.0225069	1
Medtr7g076770	chr7	28956495..28957064	3.27519	8.14919	283.89	0.00054032	0.0225069	1
Medtr1g061170	chr1	complement(26682280..26685220)	9.23151	-0.467527	-1.38274	0.000544204	0.0226497	1
Medtr0334s0010	scaffold0334	3468..6498	1164.28	-0.44408	-1.36045	0.000544645	0.0226497	1
Medtr7g109480	chr7	complement(44772013..44778065)	11.7512	0.389971	1.31037	0.00054575	0.0226769	1
Medtr2g075780	chr2	31693222..31703152	15.044	-0.479311	-1.39408	0.00054976	0.0228248	1
Medtr8g067280	chr8	28079487..28082002	7.71215	0.505186	1.41931	0.000554927	0.0230203	1
Medtr0027s0180	scaffold0027	58501..61787	3.85426	0.777323	1.71395	0.000558439	0.023147	1
Medtr8g096670	chr8	complement(40548847..40550166)	13.6332	0.58289	1.49785	0.000564679	0.0233864	1
Medtr6g038390	chr6	13759824..13761899	131.393	0.350834	1.2753	0.000565926	0.0233997	1
Medtr8g059395	chr8	complement(20840661..20842074)	3.62709	-1.48952	-2.80795	0.000565739	0.0233997	1
Medtr6g088715	chr6	complement(33847397..33856882)	14.2694	0.373729	1.2957	0.000568002	0.0234663	1
Medtr5g026760	chr5	complement(11048236..11050391)	0.97128	8.13201	280.53	0.000568788	0.0234738	1
Medtr7g099960	chr7	complement(40179771..40180795)	72.1023	0.362849	1.28596	0.000569116	0.0234738	1
Medtr2g008650	chr2	complement(1566568..1569207)	0.319146	2.83521	7.13649	0.000569839	0.0234844	1
Medtr4g069030	chr4	25923352..25926951	55.2476	0.445716	1.36199	0.000575634	0.0237039	1
Medtr1g027150	chr1	8961183..8963268	14.5415	-0.448607	-1.36472	0.000578005	0.0237821	1
Medtr4g066630	chr4	complement(25178813..25181339)	46.6133	-0.569126	-1.48362	0.00058395	0.0240072	1
Medtr4g060890	chr4	22395356..22396568	6.52128	-0.687704	-1.61072	0.00058575	0.0240615	1
Medtr6g033295	chr6	complement(10620085..10621994)	98.0845	-0.350661	-1.27514	0.000592728	0.0243284	1
Medtr5g081410	chr5	complement(34861053..34865519)	9.1071	0.474949	1.38987	0.00059532	0.0244149	1
Medtr3g084850	chr3	38328311..38330236	15.6929	0.516112	1.4301	0.000596498	0.0244433	1
Medtr8g035810	chr8	complement(13094804..13100514)	59.4142	-0.351839	-1.27619	0.000605269	0.0247826	1
Medtr2g102670	chr2	complement(44231525..44238600)	151.167	-0.456898	-1.37259	0.000605934	0.0247897	1
Medtr4g107720	chr4	44630520..44633703	28.7388	0.479202	1.39397	0.000606997	0.0248131	1
Medtr2g086070	chr2	complement(36181315..36187148)	16.911	-0.535817	-1.44976	0.000607603	0.0248177	1
Medtr1g062620	chr1	27400918..27408864	21.6182	-0.416593	-1.33477	0.000611397	0.0249525	1
Medtr1g028320	chr1	complement(9514158..9515701)	25.8745	0.441383	1.35791	0.000617894	0.0251973	1
Medtr8g037315	chr8	complement(13896651..13903093)	25.419	0.464192	1.37954	0.000619729	0.0252517	1
Medtr7g085610	chr7	complement(33186346..33186948)	18.3646	-0.60964	-1.52588	0.000621917	0.0253204	1
Medtr5g026450	chr5	complement(10872142..10874226)	2.82084	1.06593	2.09352	0.000626588	0.02549	1
Medtr5g076140	chr5	32425329..32428370	9.4954	0.459516	1.37508	0.00062822	0.0255358	1
Medtr1g048360	chr1	complement(18319614..18322587)	0.266632	3.69214	12.9254	0.000634485	0.0257697	1
Medtr5g019010	chr5	7152073..7154888	296.677	-0.472177	-1.3872	0.000635358	0.0257844	1
Medtr4g013090	chr4	complement(3518948..3521833)	27.7169	0.379242	1.30066	0.000640987	0.0259919	1
Medtr1g100747	chr1	45681413..45684476	4.10611	0.978553	1.97049	0.000644363	0.0261078	1
Medtr4g118610	chr4	49131239..49135116	7.12525	0.651682	1.571	0.000645735	0.0261424	1
Medtr7g116710	chr7	48194770..48198660	8.34226	0.574171	1.48882	0.000646556	0.0261547	1
Medtr6g007985	chr6	2166326..2169167	1.62966	8.65464	403.001	0.000652645	0.0263798	1
Medtr7g093260	chr7	complement(37049621..37051882)	37.2863	0.362517	1.28567	0.000658155	0.0265812	1
Medtr4g082930	chr4	32240714..32244145	2.25168	0.753908	1.68635	0.000664293	0.0268077	1
Medtr5g085950	chr5	37149495..37160045	14.754	-0.448678	-1.36479	0.000667383	0.0269108	1
Medtr6g005340	chr6	712271..713359	567.539	-0.4855	-1.40007	0.000668385	0.0269297	1
Medtr8g031120	chr8	11621963..11622749	2.37905	8.15317	284.675	0.000670919	0.0269887	1
Medtr8g075830	chr8	complement(32067080..32070076)	4.66126	0.938474	1.9165	0.000670507	0.0269887	1
Medtr3g097420	chr3	44660826..44661550	8.06741	0.912	1.88165	0.000672675	0.0270163	1
Medtr7g101395	chr7	40942826..40946044	130.464	0.343551	1.26888	0.000672397	0.0270163	1
Medtr8g041890	chr8	complement(15804243..15808085)	6.46018	-0.553627	-1.46777	0.00067335	0.0270218	1
Medtr7g094190	chr7	complement(37486714..37489500)	27.7449	0.357843	1.28151	0.000675216	0.0270752	1
Medtr7g099890	chr7	complement(40145045..40151081)	18.0876	0.421251	1.33909	0.000676001	0.0270852	1
Medtr3g028465	chr3	9023312..9023905	92.623	-0.453062	-1.36894	0.000676631	0.0270889	1
Medtr8g098915	chr8	41403948..41406200	34.0724	-0.510478	-1.42452	0.00067923	0.0271714	1
Medtr1g009720	chr1	1458446..1464777	0.198271	3.29124	9.78955	0.000683197	0.0273084	1
Medtr4g082360	chr4	32084257..32085405	29.7492	-0.48356	-1.39819	0.000686508	0.027419	1
Medtr6g087990	chr6	complement(33125423..33127659)	352.233	0.376047	1.29778	0.000687086	0.0274204	1
Medtr6g071400	chr6	complement(26154097..26154741)	1.02313	2.65189	6.28488	0.000690793	0.0275465	1
Medtr5g041080	chr5	18046846..18048292	8.85743	0.70952	1.63526	0.000693868	0.0276473	1
Medtr1g071530	chr1	31744111..31751380	13.4447	-0.497825	-1.41208	0.000696984	0.0277495	1
Medtr1g086310	chr1	38625116..38626309	53.2284	-0.36983	-1.2922	0.000699708	0.027836	1
Medtr8g009170	chr8	2053790..2056198	0.377361	2.82392	7.08083	0.000701351	0.0278794	1
Medtr3g046670	chr3	15460276..15461829	3.46179	-1.00984	-2.01369	0.000705475	0.0280212	1
Medtr7g085810	chr7	complement(33273705..33274484)	2.57964	1.47256	2.77513	0.000710592	0.0282023	1
Medtr2g023790	chr2	8421715..8423085	4.15215	-0.827086	-1.7741	0.000711394	0.0282119	1
Medtr3g079320	chr3	35671734..35673404	1.3454	1.71182	3.27575	0.000713008	0.0282537	1
Medtr4g050990	chr4	18094925..18099218	17.5137	-0.377121	-1.29875	0.000716875	0.0283847	1
Medtr6g091680	chr6	complement(34530206..34532899)	41.8804	-0.603513	-1.51941	0.000721657	0.0285292	1
Medtr8g092990	chr8	complement(38861044..38862025)	2.20217	-1.35649	-2.56061	0.000721283	0.0285292	1
Medtr8g009280	chr8	2101157..2105141	19.3857	0.488099	1.4026	0.000722354	0.0285344	1
Medtr6g036920	chr6	12975993..12977162	0.573544	2.12309	4.35625	0.000723678	0.0285643	1
Medtr5g012010	chr5	complement(3546326..3548008)	20.03	0.385174	1.30602	0.000729293	0.0287635	1
Medtr1g050502	chr1	19499599..19502165	61.8014	-0.354254	-1.27832	0.000738117	0.0290887	1
Medtr5g085980	chr5	complement(37167197..37171040)	76.5468	-0.35124	-1.27566	0.000742196	0.0292266	1
Medtr8g038650	chr8	14331450..14333078	1.06345	2.47253	5.55015	0.000743214	0.0292439	1
Medtr4g094698	chr4	38752751..38753724	14.5112	-0.533781	-1.44772	0.000747776	0.0293777	1
Medtr5g075220	chr5	complement(31949940..31954029)	21.9894	-0.420037	-1.33796	0.000747778	0.0293777	1
Medtr1g018610	chr1	complement(5399279..5402250)	2.58857	-0.990731	-1.98719	0.000753592	0.029583	1
Medtr4g073330	chr4	27744250..27748377	0.27897	4.53181	23.1319	0.000754451	0.0295937	1
Medtr4g099400	chr4	41244357..41245315	33.0637	-0.589291	-1.50451	0.00075691	0.0296671	1
Medtr4g085100	chr4	complement(33284205..33286097)	176.574	-0.342599	-1.26804	0.000757561	0.0296696	1
Medtr4g093835	chr4	complement(37256885..37257618)	201.496	-0.345324	-1.27044	0.0007605	0.0297616	1
Medtr3g078420	chr3	35339460..35340250	463.024	-0.434619	-1.35155	0.000763838	0.029869	1
Medtr2g100450	chr2	43162381..43168381	11.7732	-0.450433	-1.36645	0.000764835	0.0298848	1
Medtr4g030930	chr4	10524602..10538101	9.34027	-0.47247	-1.38748	0.000770188	0.0300474	1
Medtr4g073920	chr4	complement(28094234..28095187)	5.95908	0.782042	1.71956	0.000770092	0.0300474	1
Medtr7g074865	chr7	28002007..28002860	38.9809	-0.736691	-1.66635	0.000771465	0.030074	1
Medtr5g080000	chr5	34238597..34241380	3.00249	-0.64946	-1.56858	0.000772701	0.0300989	1
Medtr1g012610	chr1	2557243..2561512	20.9396	0.353692	1.27783	0.000773876	0.0301214	1
Medtr1g109390	chr1	complement(49467596..49471955)	1.43074	1.21099	2.31496	0.000776481	0.0301995	1
Medtr8g442410	chr8	complement(16022101..16023753)	7.18932	0.625576	1.54283	0.000778074	0.0302382	1
Medtr2g007640	chr2	1048874..1052079	5.06044	-0.599489	-1.51518	0.000779447	0.0302682	1
Medtr5g086630	chr5	complement(37434385..37437411)	3.62677	-0.622092	-1.53911	0.000785487	0.0304692	1
Medtr5g090660	chr5	39471989..39474539	1.5736	1.20017	2.29767	0.000786036	0.0304692	1
Medtr7g096390	chr7	38674319..38674906	33.3141	-0.667256	-1.58805	0.000786433	0.0304692	1
Medtr1g019640	chr1	5948679..5949279	6.15253	1.23987	2.36177	0.000791234	0.0306316	1
Medtr2g010600	chr2	2462198..2462881	5.25781	-1.18188	-2.26872	0.000793678	0.0307027	1
Medtr4g074350	chr4	28314600..28318209	150.621	0.338682	1.2646	0.000795511	0.03075	1
Medtr4g011450	chr4	2793467..2800896	2.53345	-0.76433	-1.69858	0.000810611	0.0313097	1
Medtr2g035230	chr2	13576004..13576690	27.8526	0.519447	1.43341	0.000818598	0.031594	1
Medtr1g019940	chr1	complement(6088051..6092381)	171.426	-0.418316	-1.33637	0.000821886	0.0316966	1
Medtr5g090880	chr5	complement(39586179..39587728)	0.409324	2.43674	5.41418	0.000824382	0.0317444	1
Medtr7g077010	chr7	complement(29078043..29078612)	2.69802	7.86789	233.598	0.000824173	0.0317444	1
Medtr7g085930	chr7	33324746..33326158	32.1692	-0.521887	-1.43583	0.000829764	0.0319273	1
Medtr2g438760	chr2	15678476..15683145	1.40987	-1.03887	-2.05462	0.000837674	0.032207	1
Medtr8g060850	chr8	21269935..21271088	694.312	0.458424	1.37404	0.000839721	0.0322611	1
Medtr7g081805	chr7	31410601..31411585	4.69916	0.893916	1.85821	0.000841633	0.03231	1
Medtr6g092660	chr6	34891218..34892661	4.88877	0.714748	1.6412	0.000844195	0.0323837	1
Medtr8g099030	chr8	41549932..41560259	15.0114	-0.354288	-1.27835	0.000848274	0.0325154	1
Medtr3g065250	chr3	complement(29440650..29444625)	576.913	0.409938	1.32863	0.000855138	0.0327537	1
Medtr2g072110	chr2	30246991..30255319	7.54469	-0.39498	-1.31492	0.000860834	0.0329468	1
Medtr4g037015	chr4	complement(13604453..13607704)	0.795967	8.45189	350.164	0.000861845	0.0329605	1
Medtr5g023370	chr5	complement(9301040..9302030)	1.70474	1.3533	2.55495	0.000863763	0.0330088	1
Medtr1g017990	chr1	5145127..5146802	58.0752	-0.346345	-1.27134	0.000864703	0.0330197	1
Medtr1g082550	chr1	36736012..36737619	73.2748	-0.343841	-1.26913	0.000868575	0.0331425	1
Medtr3g067430	chr3	complement(30049149..30050282)	381.311	0.450585	1.36659	0.000871014	0.0332104	1
Medtr5g085930	chr5	37143802..37145464	3.20011	-0.928427	-1.9032	0.000873381	0.0332755	1
Medtr1g008740	chr1	1057858..1061279	14.8824	-0.462821	-1.37823	0.000877	0.0333434	1
Medtr8g028450	chr8	complement(10788310..10790852)	65.0888	0.348312	1.27307	0.000877145	0.0333434	1
Medtr8g069840	chr8	complement(29491631..29513567)	0.734346	0.900997	1.86736	0.00087683	0.0333434	1
Medtr8g020590	chr8	7259905..7260934	0.504327	4.46726	22.1197	0.000878989	0.0333884	1
Medtr7g110780	chr7	45404688..45406446	19.8569	0.540161	1.45413	0.000881031	0.0334407	1
Medtr0055s0110	scaffold0055	58201..61046	9.00642	-0.906905	-1.87502	0.000883771	0.0335195	1
Medtr8g078200	chr8	complement(33325757..33327191)	8.86309	-0.549716	-1.4638	0.000886035	0.0335801	1
Medtr3g103190	chr3	complement(47564060..47565215)	65.935	-0.396765	-1.31655	0.000887702	0.033618	1
Medtr1g043320	chr1	16239024..16239671	2317.91	-0.465786	-1.38107	0.000890554	0.0337007	1
Medtr7g020980	chr7	6566578..6569664	36.9735	-0.511805	-1.42583	0.000894722	0.0338331	1
Medtr3g102530	chr3	complement(47252673..47254814)	5.65798	0.591907	1.50724	0.000897344	0.0339068	1
Medtr5g005570	chr5	complement(505257..508123)	1.45814	7.78563	220.652	0.00090859	0.0343061	1
Medtr4g006830	chr4	824939..827878	117.898	0.34516	1.27029	0.000910466	0.0343512	1
Medtr3g047190	chr3	complement(15689254..15689968)	2.11888	7.84816	230.426	0.000925148	0.034879	1
Medtr3g007590	chr3	1071207..1072461	15.2099	-0.521197	-1.43515	0.000928183	0.0349673	1
Medtr4g033150	chr4	11506997..11508519	2.59934	0.984043	1.978	0.000932002	0.035085	1
Medtr2g040500	chr2	17771507..17774251	1.46059	1.01395	2.01943	0.000937024	0.0352215	1
Medtr3g109430	chr3	complement(50613033..50613920)	7.00919	-0.670841	-1.592	0.000936799	0.0352215	1
Medtr8g105355	chr8	44458876..44462654	1.42565	-0.892427	-1.8563	0.000943013	0.0354202	1
Medtr7g028415	chr7	9606412..9608419	14.7214	-0.569547	-1.48406	0.000944813	0.0354614	1
Medtr3g086940	chr3	39410214..39413658	45.3958	-0.393106	-1.31322	0.000946934	0.0355146	1
Medtr3g037330	chr3	13703827..13711823	17.5111	-0.459348	-1.37492	0.000948501	0.0355469	1
Medtr3g010170	chr3	2312481..2319318	29.129	-0.355275	-1.27923	0.000949357	0.0355526	1
Medtr2g018680	chr2	complement(5901985..5904291)	80.5057	0.347011	1.27192	0.00095109	0.0355911	1
Medtr8g089840	chr8	complement(37475567..37478408)	11.9469	0.459926	1.37547	0.00097005	0.0362737	1
Medtr3g110450	chr3	51550858..51554388	14.9534	-0.413918	-1.3323	0.000974249	0.0363768	1
Medtr4g096840	chr4	38542890..38546885	4.77627	0.768388	1.70337	0.000973554	0.0363768	1
Medtr5g011210	chr5	complement(3183139..3184843)	0.820738	2.1021	4.29334	0.000977276	0.0364628	1
Medtr5g033090	chr5	14260828..14261709	236.375	0.335459	1.26178	0.000979538	0.0365141	1
Medtr7g102120	chr7	41212782..41213954	33.3973	0.384515	1.30542	0.000980098	0.0365141	1
Medtr2g089965	chr2	38044330..38045408	43.5069	-0.641474	-1.55992	0.000981071	0.0365234	1
Medtr7g011630	chr7	3160093..3161484	1.04078	7.78418	220.431	0.000988433	0.0367703	1
Medtr2g101370	chr2	43584848..43585844	3.39847	1.52862	2.88509	0.000993741	0.0369405	1
Medtr3g076990	chr3	complement(34563681..34568181)	27.5069	0.349717	1.27431	0.00100125	0.0371922	1
Medtr1g037520	chr1	complement(13864271..13866235)	48.6575	-0.351362	-1.27576	0.0010023	0.0372038	1
Medtr4g020520	chr4	complement(6521677..6524218)	0.910089	7.75685	216.294	0.00100651	0.0373328	1
Medtr3g095440	chr3	43609253..43611752	3.83988	1.11955	2.1728	0.00100957	0.0374187	1
Medtr2g040010	chr2	complement(17552516..17554131)	9.48252	0.564019	1.47838	0.0010121	0.0374849	1
Medtr2g041960	chr2	complement(18325624..18329227)	65.9359	-0.337201	-1.2633	0.00101455	0.0375408	1
Medtr5g016440	chr5	5892570..5894341	9.59354	-0.604411	-1.52036	0.0010151	0.0375408	1
Medtr4g114250	chr4	47066753..47069352	1.24641	-0.931484	-1.90724	0.00102014	0.0376997	1
Medtr4g098850	chr4	complement(40768097..40778727)	3.24286	-0.663983	-1.58445	0.00102746	0.0379424	1
Medtr7g082810	chr7	complement(31755163..31759381)	0.79297	1.46617	2.76287	0.00103554	0.0382125	1
Medtr2g087000	chr2	complement(36587743..36588904)	10.8913	0.542605	1.4566	0.00103728	0.0382211	1
Medtr4g094815	chr4	39053260..39056533	98.7117	0.482996	1.39764	0.00103679	0.0382211	1
Medtr7g101250	chr7	40859944..40861013	25.2352	-0.374505	-1.29639	0.00104313	0.0384086	1
Medtr2g072380	chr2	30465464..30469865	21.4249	-0.495865	-1.41017	0.00104483	0.038443	1
Medtr4g117390	chr4	48691786..48693934	25.8729	-0.545289	-1.45931	0.00104594	0.0384557	1
Medtr6g059730	chr6	20493190..20494222	159.954	0.419356	1.33733	0.00105209	0.0386538	1
Medtr4g127580	chr4	complement(52987566..52995663)	17.5989	0.607594	1.52372	0.00105693	0.0388032	1
Medtr7g112420	chr7	46213408..46219631	6.28027	0.557455	1.47167	0.00106058	0.0389089	1
Medtr3g449520	chr3	16872265..16872561	4.96183	-1.41548	-2.66748	0.00107023	0.0392345	1
Medtr3g101210	chr3	46559323..46565472	42.3895	-0.337859	-1.26388	0.0010759	0.0394138	1
Medtr7g116340	chr7	47977433..47979285	33.5856	0.358009	1.28166	0.00108399	0.0396793	1
Medtr0038s0080	scaffold0038	42798..47150	1.98634	-0.802408	-1.74401	0.00108472	0.0396793	1
Medtr4g048000	chr4	complement(16929374..16947707)	11.7114	0.458947	1.37454	0.0010858	0.0396899	1
Medtr4g018800	chr4	complement(5804032..5806388)	8.91756	0.568843	1.48333	0.00109136	0.0398644	1
Medtr5g095710	chr5	41838292..41839744	6.19525	0.583127	1.49809	0.00109516	0.039974	1
Medtr4g065850	chr4	complement(24780996..24782422)	25.793	0.477056	1.3919	0.00109854	0.0400686	1
Medtr5g064510	chr5	27096176..27097119	48.4126	-0.354043	-1.27814	0.00110296	0.0402007	1
Medtr0648s0010	scaffold0648	complement(493..833)	2.67931	1.99388	3.98306	0.00112294	0.0408993	1
Medtr7g056663	chr7	20286578..20290337	8.5413	-0.502312	-1.41648	0.00112539	0.0409591	1
Medtr4g081180	chr4	complement(31431311..31435216)	19.7297	0.653474	1.57295	0.0011323	0.0411809	1
Medtr1g067490	chr1	complement(29109043..29111688)	83.5643	0.340882	1.26653	0.00113382	0.0412063	1
Medtr0024s0220	scaffold0024	96431..99896	166.91	0.334577	1.26101	0.00113923	0.0413432	1
Medtr1514s0010	scaffold1514	18..1637	6.7417	-0.803256	-1.74504	0.00113874	0.0413432	1
Medtr5g017550	chr5	6409717..6410490	9.81669	0.736382	1.66599	0.00114309	0.0414538	1
Medtr6g013420	chr6	complement(4239444..4242363)	58.369	0.346247	1.27125	0.00115198	0.0417459	1
Medtr3g460760	chr3	23867366..23868679	26.5515	0.36103	1.28434	0.0011541	0.0417928	1
Medtr8g099475	chr8	41983607..41984114	15.1668	-0.637678	-1.55582	0.00115731	0.041879	1
Medtr5g090810	chr5	complement(39543039..39545295)	3.04432	0.804179	1.74615	0.00115991	0.0419429	1
Medtr5g034930	chr5	15189184..15192879	5.05619	0.697937	1.62218	0.00116439	0.042075	1
Medtr6g018270	chr6	complement(6983957..6985940)	41.883	-0.556664	-1.47086	0.00116618	0.0421093	1
Medtr7g113160	chr7	46584129..46584929	14.9972	0.627659	1.54506	0.00116898	0.0421804	1
Medtr5g077760	chr5	33189468..33189898	9.79339	-0.796023	-1.73631	0.00117144	0.042239	1
Medtr8g479380	chr8	complement(33832172..33836070)	79.7657	0.379339	1.30075	0.00117238	0.0422425	1
Medtr1g064230	chr1	28254735..28256581	36.7135	0.364937	1.28783	0.00117798	0.0423534	1
Medtr1g083960	chr1	complement(37414042..37417653)	485.901	0.325395	1.25301	0.00117659	0.0423534	1
Medtr2g015887	chr2	4769596..4769910	145.95	-0.351851	-1.2762	0.00117714	0.0423534	1
Medtr5g088770	chr5	complement(38552423..38553862)	420.799	-0.385971	-1.30674	0.00118103	0.0424331	1
Medtr4g057970	chr4	complement(21466740..21470747)	45.147	0.337184	1.26329	0.00118499	0.0425451	1
Medtr3g464330	chr3	complement(25836811..25841263)	57.6824	0.338548	1.26448	0.00119882	0.0430104	1
Medtr4g121930	chr4	complement(50340762..50343181)	42.4002	0.631047	1.54869	0.00119966	0.0430104	1
Medtr2g040830	chr2	17884932..17887717	11.1603	0.569059	1.48356	0.00120098	0.0430271	1
Medtr8g020920	chr8	7399879..7402554	34.3466	-0.345	-1.27015	0.00120403	0.043106	1
Medtr2g089970	chr2	38046382..38046654	27.9782	-0.766577	-1.70123	0.0012055	0.0431279	1
Medtr2g087460	chr2	36787674..36789084	4.78601	0.731036	1.65983	0.00120934	0.0432345	1
Medtr7g024500	chr7	complement(8064048..8066975)	8.13115	-0.598223	-1.51385	0.00121407	0.043373	1
Medtr3g088420	chr3	40146211..40147953	19.9662	0.483967	1.39858	0.00121533	0.043387	1
Medtr4g036880	chr4	complement(13519177..13519692)	22.8902	-0.583813	-1.4988	0.00122684	0.0437671	1
Medtr1g043220	chr1	16183227..16185953	45.4635	0.411976	1.33051	0.00123711	0.0440136	1
Medtr1g062350	chr1	complement(27214735..27215602)	0.744014	-2.56507	-5.91782	0.00123555	0.0440136	1
Medtr1g063110	chr1	27755266..27761614	21.2787	-0.347252	-1.27213	0.00123724	0.0440136	1
Medtr5g032060	chr5	complement(13747041..13751458)	1.35113	0.747501	1.67888	0.00123669	0.0440136	1
Medtr5g010390	chr5	complement(2764074..2768483)	6.00575	0.466719	1.38196	0.00123848	0.0440265	1
Medtr1g062630	chr1	complement(27409489..27410551)	0.688498	2.08448	4.24122	0.00124825	0.0443114	1
Medtr8g081510	chr8	35166970..35170149	58.1156	0.333572	1.26013	0.00124817	0.0443114	1
Medtr1g079440	chr1	35290234..35291555	0.710325	2.01488	4.04148	0.00125053	0.0443612	1
Medtr8g479260	chr8	33777150..33779789	0.292406	3.60169	12.1399	0.00125774	0.0445856	1
Medtr2g076970	chr2	32204990..32207664	13.358	-0.446255	-1.3625	0.00126065	0.0446333	1
Medtr7g070880	chr7	26229235..26230503	0.343142	4.22632	18.7176	0.00126085	0.0446333	1
Medtr2g023010	chr2	complement(8021820..8022964)	100.114	-0.332697	-1.25937	0.0012837	0.0454103	1
Medtr2g073630	chr2	complement(31228331..31237480)	1.28336	0.863813	1.81984	0.00130953	0.0462915	1
Medtr4g057230	chr4	complement(20925367..20926644)	9.09076	0.582947	1.49791	0.00131111	0.0463149	1
Medtr6g015320	chr6	complement(4993852..4995886)	12.9819	0.523068	1.43701	0.0013139	0.0463809	1
Medtr5g006160	chr5	complement(800643..803134)	3.88838	-0.616641	-1.5333	0.00131517	0.0463934	1
Medtr7g015970	chr7	complement(5016982..5020406)	171.742	0.325232	1.25287	0.00131627	0.0463995	1
Medtr6g087150	chr6	33511896..33513722	48.9768	-0.334819	-1.26122	0.0013277	0.0467699	1
Medtr5g049620	chr5	21716930..21723484	3.17339	-0.658627	-1.57858	0.00133772	0.0470901	1
Medtr7g084620	chr7	complement(32647947..32651304)	3.35463	0.980521	1.97318	0.00134067	0.0471611	1
Medtr8g023720	chr8	complement(8612008..8615892)	41.4279	-0.328094	-1.25535	0.00134479	0.0472727	1
Medtr3g110082	chr3	50968972..50975711	0.800215	1.13993	2.2037	0.00135614	0.0476388	1
Medtr4g021880	chr4	complement(7344609..7349291)	66.6914	-0.327556	-1.25489	0.00136574	0.0479426	1
Medtr6g075930	chr6	28224942..28228623	9.70804	-0.510169	-1.42422	0.00136904	0.048025	1
Medtr4g059730	chr4	22039486..22040644	1304.74	-0.410556	-1.3292	0.00137446	0.0481815	1
Medtr4g089135	chr4	35772138..35774193	3.43221	-0.710641	-1.63653	0.00137834	0.048284	1
Medtr3g084340	chr3	38076967..38079657	233.817	0.321809	1.2499	0.00138485	0.0484784	1
Medtr2g012320	chr2	complement(3035610..3037095)	2.12088	1.01016	2.01413	0.00139101	0.0486601	1
Medtr4g128770	chr4	complement(53596979..53598107)	16.0715	-0.720295	-1.64752	0.00140126	0.0489847	1
Medtr4g082590	chr4	32119330..32121070	0.945791	1.51593	2.85983	0.00140401	0.0490468	1
Medtr1g070205	chr1	30903876..30905248	4.85712	-0.764755	-1.69908	0.00140508	0.0490504	1
Medtr5g078750	chr5	complement(33651585..33654408)	3.61505	-1.34943	-2.54812	0.00141156	0.0492425	1
Medtr7g075040	chr7	28145704..28146920	2.4916	0.913169	1.88318	0.00141728	0.0493762	1
Medtr8g044940	chr8	17028230..17029511	1.91518	-1.41763	-2.67147	0.00141735	0.0493762	1
Medtr4g050910	chr4	18073549..18077036	22.0129	-0.472648	-1.38765	0.00142383	0.0495679	1
Medtr3g087590	chr3	39697587..39701455	48.945	0.327439	1.25478	0.00143813	0.0499966	1
Medtr7g013170	chr7	3752774..3754765	0.3275	2.37897	5.20165	0.00143724	0.0499966	1
Medtr4g123583	chr4	51398465..51405748	0.180844	4.31766	19.9409	0.00145554	0.050567	1
Medtr6g478030	chr6	28792237..28799904	6.50032	-0.358931	-1.28247	0.00146542	0.0508579	1
Medtr0071s0010	scaffold0071	complement(653..1916)	1.06194	2.85586	7.23933	0.00146593	0.0508579	1
Medtr4g046033	chr4	16059751..16062963	122.945	0.331214	1.25807	0.00147166	0.0510215	1
Medtr6g055960	chr6	complement(20083049..20086984)	1.30703	-0.811962	-1.7556	0.0014849	0.0514451	1
Medtr1g035190	chr1	complement(12609514..12612847)	16.5075	0.42825	1.3456	0.00149098	0.0516203	1
Medtr2g105340	chr2	45415988..45418212	55.823	-0.40443	-1.32357	0.00149732	0.0518043	1
Medtr3g437630	chr3	complement(12783814..12789398)	8.71251	-0.456392	-1.37211	0.00149848	0.051809	1
Medtr8g085980	chr8	complement(35668198..35671015)	237.21	0.319103	1.24755	0.00151319	0.0522819	1
Medtr8g046940	chr8	complement(18706074..18706664)	0.727858	3.46026	11.0063	0.00151705	0.0523792	1
Medtr8g018590	chr8	complement(6368207..6373263)	381.193	0.3177	1.24634	0.0015188	0.0524039	1
Medtr4g088025	chr4	complement(34661454..34662513)	8.98328	0.583341	1.49832	0.0015246	0.0525681	1
Medtr4g132320	chr4	55293722..55297917	21.8729	0.340789	1.26645	0.00152684	0.0526093	1
Medtr5g024180	chr5	9694636..9696231	62.533	0.33455	1.26098	0.00152955	0.0526667	1
Medtr3g075440	chr3	complement(34340379..34342818)	42.626	-0.328518	-1.25572	0.00153211	0.0527188	1
Medtr1g054965	chr1	complement(24148207..24154122)	15.1332	0.44845	1.36457	0.00153565	0.0528021	1
Medtr7g093910	chr7	complement(37367294..37368164)	42.3847	0.389295	1.30975	0.00153663	0.0528021	1
Medtr1g021610	chr1	complement(6496817..6500636)	8.53014	-0.468711	-1.38387	0.0015389	0.0528444	1
Medtr5g089820	chr5	complement(39064158..39064993)	30.058	-0.498876	-1.41311	0.00154326	0.0529579	1
Medtr7g099610	chr7	complement(39954629..39955227)	63.0118	0.430938	1.34811	0.00154988	0.0531491	1
Medtr3g082050	chr3	37013929..37020905	1.49093	0.967916	1.95601	0.00155922	0.053288	1
Medtr4g077590	chr4	29702473..29705399	22.2492	0.339591	1.2654	0.0015568	0.053288	1
Medtr5g022240	chr5	8755760..8758476	10.5433	-0.408086	-1.32692	0.00155876	0.053288	1
Medtr7g114970	chr7	complement(47466874..47470750)	36.5547	0.327725	1.25503	0.00155901	0.053288	1
Medtr0181s0030	scaffold0181	complement(9535..12006)	5.56925	-0.575828	-1.49053	0.00155728	0.053288	1
Medtr3g031040	chr3	complement(9869222..9877949)	13.4117	0.334646	1.26107	0.00157383	0.0537509	1
Medtr2g017450	chr2	5476127..5479958	0.160731	4.25224	19.0568	0.00157969	0.0539146	1
Medtr2g096540	chr2	41234502..41235280	15.144	-0.545447	-1.45947	0.00158572	0.0540838	1
Medtr8g030890	chr8	complement(11496691..11502087)	23.9069	-0.337489	-1.26356	0.00159236	0.0542736	1
Medtr1g054035	chr1	23029056..23031957	0.826393	1.68705	3.21997	0.00159412	0.0542969	1
Medtr5g020080	chr5	7655172..7655684	686.864	-0.394275	-1.31428	0.00160054	0.054442	1
Medtr8g039870	chr8	complement(14812163..14815999)	8.53684	-0.766812	-1.70151	0.00159993	0.054442	1
Medtr4g005260	chr4	complement(149984..150885)	1.62275	7.46269	176.398	0.00160221	0.0544621	1
Medtr1g021070	chr1	6245858..6247497	136.668	-0.320596	-1.24885	0.00160578	0.0545468	1
Medtr7g118060	chr7	complement(48999939..49000638)	249.47	0.322829	1.25078	0.00161167	0.05471	1
Medtr5g021670	chr5	8411126..8415513	6.83245	0.436789	1.35359	0.00161389	0.0547485	1
Medtr8g076900	chr8	complement(32626394..32629202)	4.57249	0.572657	1.48726	0.00162207	0.0549737	1
Medtr8g095080	chr8	39757211..39764867	20.3743	-0.334946	-1.26133	0.00162271	0.0549737	1
Medtr3g108520	chr3	49831623..49833926	5.4228	0.678536	1.60052	0.00162607	0.0550507	1
Medtr2g035190	chr2	13529686..13531292	346.778	-0.485769	-1.40033	0.00162958	0.0551324	1
Medtr3g061390	chr3	24377522..24380475	2.29495	0.869018	1.82642	0.00163236	0.0551897	1
Medtr2g010320	chr2	2325979..2327493	0.777258	7.48505	179.154	0.00164112	0.0554473	1
Medtr6g079090	chr6	complement(29752605..29761538)	5.14104	-0.501757	-1.41594	0.00164218	0.0554473	1
Medtr7g087410	chr7	34003763..34007636	14.2498	-0.354537	-1.27858	0.00164339	0.055451	1
Medtr8g080570	chr8	34649876..34652021	14.3215	0.500536	1.41474	0.00165039	0.05565	1
Medtr6g018690	chr6	7196560..7198296	6.47861	-0.569914	-1.48443	0.00166065	0.0559358	1
Medtr7g006450	chr7	698037..703921	4.7993	-0.502768	-1.41693	0.00166109	0.0559358	1
Medtr3g061440	chr3	complement(24497102..24497665)	60.5811	0.349823	1.2744	0.00166874	0.056156	1
Medtr8g098375	chr8	41036621..41038486	10.1763	0.602203	1.51803	0.00167219	0.0562345	1
Medtr3g102400	chr3	47191633..47194410	31.991	-0.482118	-1.39679	0.00167412	0.0562621	1
Medtr2g025180	chr2	8956290..8961013	8.26846	0.498147	1.4124	0.00167629	0.0562975	1
Medtr8g446950	chr8	18386998..18391964	4.36985	-0.496052	-1.41035	0.00168581	0.0565793	1
Medtr7g075910	chr7	28529456..28536289	13.9723	-0.334417	-1.26087	0.00169239	0.0567348	1
Medtr8g020840	chr8	7352443..7354694	10.6577	0.401734	1.32109	0.00169269	0.0567348	1
Medtr1g103070	chr1	46630556..46633467	16.3506	0.35157	1.27595	0.00169613	0.0568124	1
Medtr3g115330	chr3	53929407..53930687	190.601	0.323128	1.25104	0.00170247	0.0569114	1
Medtr4g023050	chr4	7756324..7756779	1.82618	-2.2124	-4.63447	0.0017016	0.0569114	1
Medtr4g134140	chr4	56160044..56162081	82.9983	-0.32418	-1.25195	0.00170116	0.0569114	1
Medtr3g081090	chr3	36723909..36725596	465.687	-0.315464	-1.24441	0.00170363	0.0569126	1
Medtr8g096910	chr8	complement(40675354..40676250)	475.406	-0.461987	-1.37744	0.00170528	0.05693	1
Medtr2g089865	chr2	38003407..38005328	22.2691	-0.554075	-1.46823	0.00170738	0.0569624	1
Medtr2g028580	chr2	10604134..10610103	68.3743	-0.431476	-1.34861	0.00170952	0.0569646	1
Medtr0415s0020	scaffold0415	4168..5217	1.33109	2.60252	6.07348	0.00170971	0.0569646	1
Medtr4g064020	chr4	23885563..23886484	93.976	0.327309	1.25467	0.00172577	0.0574618	1
Medtr4g083140	chr4	32354119..32354711	27.2573	-0.504928	-1.41905	0.00173024	0.0575727	1
Medtr5g019580	chr5	7404213..7406208	64.8622	-0.32244	-1.25044	0.00173157	0.0575788	1
Medtr8g106040	chr8	44758195..44759989	5.28042	0.607766	1.5239	0.00173482	0.0576489	1
Medtr5g005960	chr5	complement(692641..694029)	6.48033	0.558183	1.47241	0.00173703	0.0576845	1
Medtr3g081310	chr3	36828718..36830894	12.5135	0.356989	1.28075	0.00174562	0.0579316	1
Medtr3g008500	chr3	1563327..1568292	24.9176	0.338027	1.26403	0.00174834	0.0579837	1
Medtr2g028180	chr2	complement(10378013..10380549)	9.49414	-0.500779	-1.41498	0.0017565	0.058216	1
Medtr4g076100	chr4	complement(29104308..29115711)	22.0264	0.335091	1.26146	0.00177026	0.0586337	1
Medtr3g091190	chr3	complement(41448415..41453682)	21.8477	0.339464	1.26529	0.00177929	0.0588941	1
Medtr3g086020	chr3	38918756..38920242	26.1681	-0.484384	-1.39899	0.00178118	0.0589179	1
Medtr7g062350	chr7	22650131..22650877	0.587137	4.23667	18.8523	0.00178461	0.0589927	1
Medtr6g083000	chr6	31009108..31010220	21.0266	-0.509644	-1.4237	0.00178586	0.0589952	1
Medtr2g033820	chr2	complement(12868146..12870310)	12.3122	-0.513833	-1.42784	0.00181828	0.0599485	1
Medtr4g101380	chr4	41871720..41876318	57.0108	0.322391	1.2504	0.00181626	0.0599485	1
Medtr6g016375	chr6	6066437..6067600	7.72734	-0.563227	-1.47757	0.0018171	0.0599485	1
Medtr3g105730	chr3	complement(48767036..48770816)	34.1828	-0.353012	-1.27722	0.00182362	0.0600708	1
Medtr7g016780	chr7	5301948..5303502	76.7485	0.322886	1.25083	0.00182437	0.0600708	1
Medtr5g064640	chr5	complement(27159514..27160389)	21.6604	-0.497492	-1.41176	0.00182662	0.0601058	1
Medtr2g078200	chr2	32505911..32507609	11.4659	0.543171	1.45717	0.00183984	0.0605014	1
Medtr7g009960	chr7	2310040..2314198	10.109	-0.368895	-1.29136	0.00185177	0.0608539	1
Medtr3g026330	chr3	complement(8110751..8112172)	16.6232	-0.465653	-1.38094	0.00187553	0.0615947	1
Medtr6g027540	chr6	9526455..9530445	6.46083	0.420643	1.33852	0.00187728	0.0616119	1
Medtr4g117450	chr4	48714018..48716850	217.375	-0.370823	-1.29309	0.00188001	0.0616615	1
Medtr8g008500	chr8	complement(1776004..1777918)	60.6215	-0.355974	-1.27985	0.00188646	0.0618328	1
Medtr8g076680	chr8	32514531..32516545	62.1721	-0.322244	-1.25027	0.00190819	0.0625044	1
Medtr4g116277	chr4	complement(48106636..48107654)	103.743	-0.321575	-1.24969	0.00191207	0.0625908	1
Medtr8g078270	chr8	33366028..33366970	21.047	-0.460692	-1.3762	0.00191492	0.0626435	1
Medtr1g111300	chr1	50274195..50274709	0.993811	2.81514	7.03785	0.0019342	0.0632332	1
Medtr5g015570	chr5	5404119..5404873	206.683	0.317432	1.24611	0.0019357	0.0632411	1
Medtr2g017810	chr2	complement(5333170..5334359)	3.96065	0.72035	1.64758	0.0019408	0.0633258	1
Medtr4g116080	chr4	complement(48004406..48006181)	23.9075	0.422351	1.34011	0.00193982	0.0633258	1
Medtr3g081690	chr3	36989575..36995192	0.363204	1.31133	2.48171	0.00194508	0.0634243	1
Medtr5g058320	chr5	complement(24102996..24104673)	0.765897	7.36134	164.431	0.00196372	0.0639908	1
Medtr2g030835	chr2	11663347..11664765	25.8959	0.534709	1.44865	0.00197234	0.0642304	1
Medtr0691s0020	scaffold0691	complement(2839..6888)	6.28381	-0.441257	-1.35779	0.001974	0.0642428	1
Medtr5g007450	chr5	1363092..1365323	322.069	-0.375023	-1.29686	0.00198212	0.0644654	1
Medtr4g125260	chr4	complement(51937267..51940056)	56.9556	-0.318494	-1.24703	0.00198369	0.064475	1
Medtr7g072510	chr7	26959446..26962343	232.201	-0.390129	-1.31051	0.00198858	0.0645924	1
Medtr1g090100	chr1	complement(40342187..40343905)	22.6567	0.405577	1.32462	0.00199011	0.0646003	1
Medtr1g075610	chr1	33481869..33484141	30.8114	0.413193	1.33163	0.0020026	0.064964	1
Medtr4g018860	chr4	5828279..5829710	11.355	-0.722089	-1.64957	0.00201243	0.0650738	1
Medtr4g029180	chr4	complement(10065888..10068147)	233.992	-0.412999	-1.33145	0.00201134	0.0650738	1
Medtr4g103680	chr4	complement(42865333..42869630)	27.3544	0.339169	1.26503	0.00200891	0.0650738	1
Medtr5g010635	chr5	complement(2886629..2887780)	2301.34	-0.368833	-1.29131	0.00200941	0.0650738	1
Medtr0126s0080	scaffold0126	complement(22859..27968)	28.1114	-0.335862	-1.26213	0.00201218	0.0650738	1
Medtr1g019490	chr1	complement(5887207..5891628)	17.4651	-0.328325	-1.25556	0.00201499	0.0651147	1
Medtr7g096370	chr7	complement(38668515..38669079)	17.0548	-0.605605	-1.52162	0.0020199	0.0652316	1
Medtr8g092820	chr8	complement(38821679..38822345)	26.3336	0.520173	1.43413	0.0020275	0.0654351	1
Medtr2g084550	chr2	complement(35719460..35724006)	42.9122	-0.321492	-1.24962	0.0020507	0.0661053	1
Medtr3g090150	chr3	40971575..40975544	1.20971	1.1606	2.23551	0.00205165	0.0661053	1
Medtr5g009080	chr5	complement(2085054..2087595)	12.6346	0.373504	1.2955	0.00205219	0.0661053	1
Medtr3g007700	chr3	complement(1123167..1126360)	127.768	0.318109	1.2467	0.00205503	0.0661545	1
Medtr1g036750	chr1	13499879..13525465	8.23906	-0.324872	-1.25255	0.00206561	0.0664101	1
Medtr1g088040	chr1	39459691..39461145	1.99097	1.0937	2.1342	0.00206482	0.0664101	1
Medtr7g105030	chr7	42575596..42582054	9.82462	0.341535	1.2671	0.00207299	0.0666049	1
Medtr5g024020	chr5	9600482..9607033	146.858	-0.47923	-1.394	0.00209128	0.0671499	1
Medtr7g059290	chr7	21393731..21399699	26.5043	0.389798	1.31021	0.00209711	0.0672942	1
Medtr3g029510	chr3	9271534..9280109	28.5104	-0.379874	-1.30123	0.00210524	0.0674725	1
Medtr4g058000	chr4	21488258..21495500	0.140367	2.63219	6.19965	0.0021064	0.0674725	1
Medtr8g015560	chr8	complement(5093188..5094109)	20.6322	-0.476838	-1.39169	0.00210668	0.0674725	1
Medtr2g093750	chr2	39991185..39994421	0.582978	7.30378	158	0.00211009	0.0675389	1
Medtr4g019090	chr4	complement(5920811..5923540)	24.185	0.334706	1.26112	0.00211195	0.0675555	1
Medtr7g111850	chr7	complement(45943475..45945951)	2.98317	0.843355	1.79422	0.0021346	0.068237	1
Medtr3g064490	chr3	complement(29053045..29057091)	0.719037	1.99074	3.9744	0.0021468	0.0685768	1
Medtr8g463760	chr8	complement(22490385..22494348)	149.157	0.350195	1.27473	0.00214795	0.0685768	1
Medtr7g080060	chr7	complement(30423350..30427562)	125.62	0.313216	1.24247	0.00215507	0.0687606	1
Medtr1g021642	chr1	6523344..6526374	3.27315	-0.626414	-1.54372	0.00216728	0.0690207	1
Medtr1g030265	chr1	10497902..10501086	22.7944	-0.346098	-1.27112	0.00216733	0.0690207	1
Medtr3g466520	chr3	27341749..27344647	0.20872	-1.98874	-3.96891	0.00216685	0.0690207	1
Medtr7g066250	chr7	complement(24114265..24119179)	90.615	-0.314014	-1.24316	0.00217436	0.0692008	1
Medtr1g076800	chr1	34282105..34283311	8.57864	0.561998	1.47631	0.00218264	0.0694206	1
Medtr4g036260	chr4	complement(11837728..11843528)	106.184	-0.314525	-1.2436	0.00219427	0.0697466	1
Medtr5g083480	chr5	complement(36023524..36026567)	3.72285	0.535915	1.44986	0.00222398	0.0706462	1
Medtr2g098540	chr2	complement(42164537..42170139)	27.0455	0.403267	1.3225	0.00222719	0.0707037	1
Medtr4g036290	chr4	complement(11849832..11850398)	1.81044	7.28729	156.204	0.00223361	0.0708451	1
Medtr6g068970	chr6	complement(24790032..24793963)	40.4018	-0.313271	-1.24252	0.00223445	0.0708451	1
Medtr1g075170	chr1	33228477..33233032	12.4596	0.590282	1.50554	0.00224117	0.0709688	1
Medtr3g070920	chr3	complement(31825342..31826060)	75.5784	0.327349	1.25471	0.00224063	0.0709688	1
Medtr3g104640	chr3	complement(48215815..48217696)	26.1654	-0.32919	-1.25631	0.00226474	0.0716703	1
Medtr1g115900	chr1	complement(52342787..52344943)	77.8662	0.41239	1.33089	0.00227047	0.0717185	1
Medtr3g070033	chr3	complement(31352086..31353097)	2.87592	-7.68189	-205.342	0.00226956	0.0717185	1
Medtr6g071605	chr6	26557232..26559691	1.05806	7.25352	152.59	0.00227053	0.0717185	1
Medtr3g093780	chr3	42847107..42851695	7.24764	-0.469143	-1.38429	0.00227199	0.0717198	1
Medtr4g024630	chr4	complement(8333916..8338986)	155.056	0.307153	1.23726	0.00228157	0.0719772	1
Medtr4g081420	chr4	31572240..31574750	9.98082	0.360633	1.28399	0.00228527	0.0720489	1
Medtr2g027870	chr2	complement(10229058..10233537)	0.385028	2.26022	4.79066	0.00229007	0.0721552	1
Medtr1g103080	chr1	46640049..46641181	60.3895	-0.472121	-1.38715	0.00229627	0.0723052	1
Medtr1g076400	chr1	34032730..34037383	13.4067	-0.327295	-1.25466	0.00230373	0.0724948	1
Medtr2g089930	chr2	38024713..38025510	82.4447	-0.526469	-1.4404	0.00230758	0.0725706	1
Medtr4g094898	chr4	39234577..39238727	14.1061	-0.58764	-1.50279	0.00231286	0.0726915	1
Medtr4g087955	chr4	complement(34618562..34622495)	8.96778	0.53521	1.44915	0.0023245	0.073012	1
Medtr7g009930	chr7	2295027..2300125	16.9006	0.345531	1.27062	0.00233708	0.0733614	1
Medtr3g086170	chr3	38990055..38995171	13.6246	-0.345839	-1.27089	0.00234192	0.0734675	1
Medtr3g118030	chr3	complement(55231747..55233931)	61.7982	0.316767	1.24554	0.00234834	0.073623	1
Medtr6g088785	chr6	33907265..33912187	6.52275	-0.478133	-1.39294	0.00235162	0.0736509	1
Medtr7g056817	chr7	20471653..20472623	7.91321	0.658875	1.57885	0.00235214	0.0736509	1
Medtr7g101130	chr7	40805732..40807403	18.7987	0.341198	1.26681	0.00235401	0.0736635	1
Medtr1g037580	chr1	13909295..13915912	0.329055	2.30497	4.94157	0.0023572	0.0737175	1
Medtr4g040360	chr4	complement(14468431..14471559)	0.419116	1.44377	2.72031	0.00236046	0.0737317	1
Medtr4g087140	chr4	complement(34141813..34143950)	4.69496	0.668558	1.58948	0.00236091	0.0737317	1
Medtr8g098945	chr8	41452698..41454224	24.8784	-0.342325	-1.2678	0.00236203	0.0737317	1
Medtr8g104820	chr8	44151627..44156037	22.2832	0.442609	1.35906	0.0023681	0.0738753	1
Medtr2g098060	chr2	complement(41899473..41901649)	1.05561	1.59285	3.01644	0.00238948	0.0744502	1
Medtr7g100240	chr7	complement(40325079..40328089)	3.83988	-0.635282	-1.55324	0.00238925	0.0744502	1
Medtr3g463910	chr3	25647054..25648082	0.58738	-3.65639	-12.6091	0.00239097	0.0744506	1
Medtr1g029810	chr1	complement(10327870..10331864)	29.9994	-0.321373	-1.24952	0.00240353	0.0745947	1
Medtr1g086080	chr1	complement(38521884..38528898)	43.569	-0.34389	-1.26917	0.00239916	0.0745947	1
Medtr3g098980	chr3	complement(45350049..45353662)	12.4989	-0.464383	-1.37973	0.00239731	0.0745947	1
Medtr4g019780	chr4	6269250..6271309	83.3723	0.315385	1.24434	0.00240402	0.0745947	1
Medtr4g109380	chr4	45425316..45425794	1.24329	2.7081	6.53461	0.00240227	0.0745947	1
Medtr5g094570	chr5	41336436..41338326	0.925262	1.35456	2.55719	0.00240447	0.0745947	1
Medtr2g101610	chr2	43712332..43715869	4.97283	0.616096	1.53272	0.00240858	0.0746763	1
Medtr3g020660	chr3	complement(5985577..5988982)	95.4077	0.31299	1.24228	0.00241704	0.0748007	1
Medtr3g030980	chr3	9849109..9853391	4.66284	-0.422394	-1.34015	0.00241582	0.0748007	1
Medtr4g062410	chr4	complement(23171645..23174266)	158.846	0.311543	1.24103	0.00241499	0.0748007	1
Medtr5g018210	chr5	complement(6770214..6775384)	16.8958	-0.325112	-1.25276	0.0024211	0.0748805	1
Medtr8g022740	chr8	complement(8059141..8071401)	25.8745	-0.310574	-1.2402	0.0024327	0.0751932	1
Medtr7g079350	chr7	30114251..30117480	8.7089	-0.478987	-1.39376	0.00243716	0.0752847	1
Medtr2g034580	chr2	13223143..13229305	7.05614	0.463395	1.37878	0.00244395	0.0753561	1
Medtr8g033290	chr8	12828653..12835651	8.25732	-0.458292	-1.37391	0.0024434	0.0753561	1
Medtr8g074750	chr8	31605622..31607883	0.685496	7.23729	150.883	0.00244283	0.0753561	1
Medtr8g086490	chr8	35881582..35884235	0.56764	7.37487	165.98	0.00245538	0.0756623	1
Medtr6g009720	chr6	complement(2884068..2886079)	3.49985	-0.62923	-1.54674	0.00246068	0.0757792	1
Medtr6g006190	chr6	complement(1012168..1016822)	119.948	-0.31104	-1.2406	0.0024751	0.0761768	1
Medtr3g094570	chr3	complement(43152682..43155807)	97.9384	0.313276	1.24253	0.00247984	0.0762762	1
Medtr0055s0120	scaffold0055	62498..67419	45.9781	-0.462836	-1.37825	0.0024868	0.0764437	1
Medtr4g021095	chr4	6810219..6817384	5.7096	-0.480449	-1.39518	0.00249166	0.076465	1
Medtr6g057680	chr6	complement(20204605..20206238)	2.24599	-1.08902	-2.12729	0.00249161	0.076465	1
Medtr7g451040	chr7	17123620..17126187	24.2106	-0.321156	-1.24933	0.00249204	0.076465	1
Medtr8g099305	chr8	41820095..41822791	26.7875	0.327561	1.25489	0.00249434	0.076489	1
Medtr2g043230	chr2	18824191..18827678	50.9099	0.32029	1.24858	0.00249756	0.0765413	1
Medtr5g009200	chr5	complement(2145303..2146586)	0.784655	7.14721	141.75	0.00249911	0.0765424	1
Medtr4g107970	chr4	44750401..44754733	74.9158	-0.308882	-1.23875	0.00251856	0.0770912	1
Medtr1g027030	chr1	complement(8920173..8925104)	3.99742	-0.549193	-1.46327	0.00252642	0.077285	1
Medtr1g035770	chr1	complement(13071858..13072722)	21.8213	0.480903	1.39562	0.00253703	0.0775623	1
Medtr3g028040	chr3	8860656..8864414	0.83671	0.83824	1.78787	0.00255845	0.0781698	1
Medtr5g091120	chr5	39707622..39709721	258.726	0.309705	1.23945	0.00256625	0.0783609	1
Medtr1g060050	chr1	26155444..26156698	22.7917	0.341665	1.26722	0.00257154	0.0783904	1
Medtr2g089905	chr2	38019034..38019814	9.38369	-0.906951	-1.87508	0.0025711	0.0783904	1
Medtr7g108930	chr7	complement(44513813..44520053)	57.8038	-0.307659	-1.2377	0.00257188	0.0783904	1
Medtr5g033080	chr5	complement(14250724..14258581)	0.957073	0.992135	1.98913	0.00258403	0.0787129	1
Medtr4g094835	chr4	complement(39087429..39089209)	3.04214	0.655866	1.57556	0.00260087	0.0791782	1
Medtr3g078700	chr3	35505221..35510054	34.4517	0.321846	1.24993	0.00260507	0.0791993	1
Medtr4g011320	chr4	complement(2715080..2719033)	0.615822	-2.21003	-4.62685	0.00260527	0.0791993	1
Medtr7g107420	chr7	43828281..43829757	196.971	0.307895	1.2379	0.00260627	0.0791993	1
Medtr1g106915	chr1	48402045..48402972	4.66521	0.88138	1.84214	0.00262832	0.0798078	1
Medtr3g118390	chr3	55413457..55415176	859.613	-0.365445	-1.28828	0.00262946	0.0798078	1
Medtr4g102660	chr4	complement(42553246..42554433)	0.350317	2.50517	5.67715	0.00264159	0.0801277	1
Medtr8g015570	chr8	complement(5096829..5099426)	176.725	0.308095	1.23807	0.0026454	0.0801951	1
Medtr2g054940	chr2	complement(23498653..23501338)	22.4332	0.32452	1.25225	0.00265126	0.0803245	1
Medtr1g076310	chr1	complement(33983377..33985781)	10.1263	0.662296	1.5826	0.00265488	0.0803859	1
Medtr1g052640	chr1	21538163..21549370	27.0815	-0.314267	-1.24338	0.00265778	0.0804254	1
Medtr7g113970	chr7	complement(47005269..47010398)	19.2084	-0.323525	-1.25138	0.00267171	0.0807985	1
Medtr8g058563	chr8	20190407..20191939	10.6872	-0.699052	-1.62344	0.00268091	0.0810282	1
Medtr5g097900	chr5	complement(42874291..42875621)	68.4507	0.314817	1.24385	0.00270014	0.0815604	1
Medtr3g083370	chr3	37628015..37630303	108.758	-0.34647	-1.27145	0.00271065	0.0817309	1
Medtr5g020270	chr5	complement(7751753..7755453)	14.4961	0.416035	1.33426	0.00270999	0.0817309	1
Medtr5g026740	chr5	complement(11040134..11042699)	180.107	0.349424	1.27405	0.00270864	0.0817309	1
Medtr4g093600	chr4	37115889..37117993	28.9658	-0.32976	-1.2568	0.00271901	0.0819342	1
Medtr3g436160	chr3	complement(12134909..12141145)	0.1928	2.81703	7.0471	0.00272673	0.082087	1
Medtr8g107370	chr8	45369296..45375330	35.6919	0.312658	1.24199	0.00272734	0.082087	1
Medtr7g116130	chr7	complement(47873379..47875349)	0.456123	7.09465	136.679	0.00273812	0.0823622	1
Medtr3g010780	chr3	complement(2577246..2582559)	0.274248	2.60197	6.07115	0.002765	0.0831213	1
Medtr3g007630	chr3	1086871..1094084	6.9198	-0.512869	-1.42689	0.00279003	0.0838238	1
Medtr2g096380	chr2	complement(41173925..41175393)	108.017	-0.307226	-1.23733	0.00279226	0.083841	1
Medtr2g008220	chr2	1361040..1362458	111.155	0.366538	1.28926	0.00279412	0.0838468	1
Medtr4g091150	chr4	36079503..36081131	0.558716	7.11339	138.467	0.00279579	0.083847	1
Medtr2g097540	chr2	41654460..41658806	0.462721	2.11916	4.34441	0.00280838	0.0841746	1
Medtr4g112320	chr4	46124357..46130061	3.58306	-1.02034	-2.02839	0.00281429	0.084283	1
Medtr7g066640	chr7	complement(24266489..24267289)	4.9238	-0.917973	-1.88946	0.00281534	0.084283	1
Medtr4g027390	chr4	complement(9462674..9466238)	419.812	-0.361749	-1.28498	0.00281992	0.0843201	1
Medtr0194s0030	scaffold0194	complement(12738..17347)	21.6746	-0.361949	-1.28516	0.00281871	0.0843201	1
Medtr3g467140	chr3	complement(27673375..27677774)	14.5306	0.318376	1.24693	0.00283834	0.0847704	1
Medtr7g079140	chr7	29926853..29929807	1.84912	-0.934361	-1.91104	0.00283707	0.0847704	1
Medtr7g105080	chr7	complement(42608272..42609855)	249.736	0.304047	1.2346	0.00284088	0.084796	1
Medtr4g011790	chr4	2975966..2984037	31.3059	-0.312263	-1.24165	0.0028627	0.0853465	1
Medtr7g118300	chr7	complement(49097646..49099435)	220.93	-0.421544	-1.33936	0.00286248	0.0853465	1
Medtr1g112200	chr1	50747864..50748766	10.613	0.538766	1.45273	0.00286877	0.0854264	1
Medtr4g117380	chr4	48686385..48690462	53.0369	0.313847	1.24302	0.0028674	0.0854264	1
Medtr8g063200	chr8	complement(26460444..26461240)	9.14238	0.778144	1.71492	0.00287908	0.0856829	1
Medtr7g112430	chr7	46222163..46225753	11.6948	0.341375	1.26696	0.00288196	0.085718	1
Medtr5g005710	chr5	583141..585062	33.1326	0.377483	1.29907	0.00290007	0.0862056	1
Medtr6g074855	chr6	complement(27702167..27706751)	1.96746	-0.60931	-1.52553	0.00291018	0.0864553	1
Medtr3g093380	chr3	42666847..42671021	40.2503	0.321933	1.25	0.0029406	0.0873077	1
Medtr5g016570	chr5	complement(5953978..5956062)	3.08756	-0.626707	-1.54404	0.00294438	0.0873178	1
Medtr0055s0050	scaffold0055	complement(14674..18043)	43.9833	-0.476057	-1.39094	0.0029444	0.0873178	1
Medtr1g019760	chr1	complement(6004898..6010964)	34.3261	-0.311218	-1.24076	0.00295031	0.0874416	1
Medtr4g046757	chr4	16578070..16581142	0.19285	4.09262	17.0608	0.00297269	0.0880014	1
Medtr8g045300	chr8	complement(17691244..17693099)	64.394	0.496809	1.41109	0.00297103	0.0880014	1
Medtr1g083440	chr1	37135518..37137717	3.88353	0.604727	1.52069	0.00298649	0.0883063	1
Medtr5g088980	chr5	complement(38633820..38636983)	15.2929	0.338013	1.26401	0.00298584	0.0883063	1
Medtr4g133110	chr4	55694514..55695397	32.2204	0.524665	1.4386	0.00300995	0.0889479	1
Medtr8g080520	chr8	34636764..34638483	7.64154	0.598935	1.5146	0.00301311	0.0889892	1
Medtr3g452730	chr3	19333230..19335572	1.37809	-0.931141	-1.90678	0.00301753	0.0890154	1
Medtr3g077050	chr3	34601399..34602531	170.922	0.334219	1.26069	0.00301726	0.0890154	1
Medtr1g100335	chr1	complement(45228068..45232960)	53.6006	-0.315936	-1.24482	0.00302037	0.089047	1
Medtr2g100410	chr2	43146876..43150214	202.828	0.302935	1.23365	0.00302255	0.0890593	1
Medtr2g072330	chr2	30427845..30431715	5.4427	0.580789	1.49567	0.00303931	0.089501	1
Medtr4g064150	chr4	complement(23910953..23914035)	31.0445	-0.308662	-1.23856	0.00305022	0.0897698	1
Medtr1g109500	chr1	49524682..49532681	10.1232	-0.387193	-1.30785	0.00305966	0.0899951	1
Medtr5g021190	chr5	complement(8137186..8143070)	26.2991	0.30916	1.23899	0.00306476	0.0900924	1
Medtr3g466790	chr3	complement(27487700..27489977)	10.7197	0.538654	1.45262	0.0030712	0.0902292	1
Medtr5g013070	chr5	4105495..4108012	6.38333	-0.452932	-1.36882	0.00307653	0.0903333	1
Medtr7g104250	chr7	complement(42240124..42240414)	67.8915	0.380608	1.30189	0.00307843	0.0903365	1
Medtr2g075770	chr2	31687197..31692593	31.9141	0.321239	1.2494	0.00309553	0.0907414	1
Medtr3g103410	chr3	complement(47711611..47713934)	13.6899	-0.396555	-1.31636	0.00309763	0.0907414	1
Medtr8g013680	chr8	complement(4187967..4191032)	22.3084	0.566427	1.48085	0.00309713	0.0907414	1
Medtr4g010650	chr4	complement(2414519..2419452)	12.1688	0.390037	1.31043	0.00310963	0.0909874	1
Medtr7g092700	chr7	36770328..36771788	36.4759	-0.352641	-1.2769	0.00310955	0.0909874	1
Medtr4g076140	chr4	29138995..29141367	1.52728	0.993876	1.99153	0.00311973	0.0912299	1
Medtr3g045230	chr3	complement(14627951..14630589)	13.9809	-0.43777	-1.35451	0.00313465	0.0916132	1
Medtr8g467380	chr8	24203821..24210537	3.57703	-0.561343	-1.47564	0.00314275	0.0917966	1
Medtr8g009270	chr8	complement(2096904..2097968)	7.35706	0.615418	1.532	0.00315222	0.09202	1
Medtr2g011600	chr2	2832244..2836610	3.61696	0.635546	1.55353	0.00316135	0.0922331	1
Medtr3g006740	chr3	complement(831963..836696)	2.17884	-0.700345	-1.62489	0.00316572	0.0922541	1
Medtr5g056935	chr5	complement(23427470..23428023)	1.07169	2.04681	4.1319	0.00316433	0.0922541	1
Medtr2g063510	chr2	complement(26800818..26805019)	24.5761	0.312375	1.24175	0.00316833	0.0922767	1
Medtr0057s0100	scaffold0057	complement(36670..37878)	34.6358	0.416085	1.3343	0.00318406	0.0926814	1
Medtr2g015680	chr2	complement(4670026..4671309)	163.645	0.304799	1.23525	0.00319202	0.0928595	1
Medtr6g071430	chr6	26142624..26148549	5.22977	-0.442869	-1.3593	0.0032008	0.0930611	1
Medtr5g017470	chr5	6385124..6387834	105.538	-0.300382	-1.23147	0.00322881	0.0938216	1
Medtr5g035670	chr5	15522025..15523640	136.726	-0.370331	-1.29265	0.00326958	0.0949276	1
Medtr7g109200	chr7	44631164..44636094	8.46234	0.327075	1.25447	0.00327064	0.0949276	1
Medtr3g116840	chr3	54637550..54639585	25.1594	-0.415143	-1.33343	0.00330391	0.095838	1
Medtr6g038820	chr6	complement(13942249..13943649)	8.93194	-0.603281	-1.51917	0.00336322	0.0975024	1
Medtr3g078490	chr3	complement(35360253..35364947)	5.18934	0.485873	1.40043	0.0033684	0.0975964	1
Medtr1g022950	chr1	7253562..7256936	3.81255	0.743129	1.6738	0.00337272	0.0976657	1
Medtr2g030200	chr2	11325642..11329365	241.961	0.320298	1.24859	0.00338536	0.0979561	1
Medtr3g065980	chr3	complement(29797559..29799202)	54.5886	0.305477	1.23583	0.00338663	0.0979561	1
Medtr2g069320	chr2	28796997..28800462	96.5119	-0.320835	-1.24905	0.00344774	0.0996665	1
Medtr1g095703	chr1	complement(43082623..43085980)	52.1704	-0.420953	-1.33881	0.00346188	0.100018	1
Medtr2g104400	chr2	complement(44960684..44970630)	29.1038	-0.299829	-1.231	0.00348072	0.10039	1
Medtr3g100420	chr3	complement(46175821..46185588)	0.204727	3.8951	14.878	0.00347905	0.10039	1
Medtr4g063200	chr4	23401818..23402612	89.2758	0.307986	1.23798	0.00347763	0.10039	1
Medtr6g084710	chr6	complement(31827562..31833136)	82.1864	-0.297286	-1.22883	0.00348819	0.100548	1
Medtr5g029230	chr5	complement(12224285..12232361)	22.3799	-0.391701	-1.31194	0.00349636	0.100725	1
Medtr3g077030	chr3	complement(34587139..34590055)	47.9876	-0.368313	-1.29084	0.00350483	0.100912	1
Medtr1g076370	chr1	complement(34015660..34017853)	15.5176	-0.41235	-1.33085	0.00351002	0.101004	1
Medtr3g466170	chr3	27189660..27196461	4.38428	0.49561	1.40992	0.00351659	0.101111	1
Medtr5g018070	chr5	complement(6721488..6726006)	36.3321	-0.304151	-1.23469	0.00351774	0.101111	1
Medtr6g072320	chr6	26761798..26765665	0.500938	-2.03286	-4.09215	0.00352669	0.10131	1
Medtr4g099060	chr4	complement(40983968..40985703)	15.3825	0.410018	1.3287	0.00353135	0.101328	1
Medtr8g077290	chr8	complement(32939870..32943504)	18.586	-0.329785	-1.25683	0.00353129	0.101328	1
Medtr1g088765	chr1	39743073..39746516	0.610481	1.27795	2.42494	0.00354688	0.10167	1
Medtr2g010520	chr2	complement(2422876..2426201)	18.6335	-0.315852	-1.24475	0.00354817	0.10167	1
Medtr4g093760	chr4	37035327..37036113	0.492086	3.81845	14.1081	0.00354987	0.10167	1
Medtr5g016520	chr5	5934758..5937281	10.7039	0.443551	1.35995	0.00355133	0.10167	1
Medtr3g102120	chr3	47047102..47049760	21.1219	-0.318063	-1.24666	0.00356806	0.102091	1
Medtr2g101120	chr2	complement(43474839..43475786)	6.16963	-0.657552	-1.5774	0.00357493	0.102172	1
Medtr5g057660	chr5	23802851..23803934	15.0739	-0.47723	-1.39207	0.00357362	0.102172	1
Medtr1g044225	chr1	complement(16707542..16708226)	4.25742	0.827813	1.77499	0.0035924	0.102462	1
Medtr3g086760	chr3	39315252..39316741	7.91445	-0.495424	-1.40974	0.00358917	0.102462	1
Medtr4g094705	chr4	38771658..38789707	10.7901	-0.415983	-1.33421	0.00359319	0.102462	1
Medtr8g031160	chr8	11645103..11645474	2.10589	6.89059	118.652	0.00359063	0.102462	1
Medtr8g037220	chr8	13784812..13798166	7.20671	-0.31468	-1.24374	0.0036171	0.103085	1
Medtr6g083010	chr6	31012211..31014135	13.8329	-0.500403	-1.41461	0.00362284	0.103132	1
Medtr8g095360	chr8	39892589..39895703	10.9103	0.461161	1.37665	0.00362229	0.103132	1
Medtr8g091930	chr8	complement(38359248..38360853)	17.2709	-0.43958	-1.35621	0.00362506	0.103137	1
Medtr7g068450	chr7	complement(25057600..25061002)	197.139	0.294608	1.22655	0.00363918	0.103481	1
Medtr8g022310	chr8	complement(7904882..7909385)	12.7204	-0.372465	-1.29456	0.00365923	0.103992	1
Medtr4g075110	chr4	complement(28665652..28667944)	26.0371	-0.40875	-1.32754	0.00366229	0.104021	1
Medtr8g007125	chr8	complement(1275958..1280575)	5.32102	0.71232	1.63844	0.00366457	0.104027	1
Medtr2g025020	chr2	complement(8864703..8871490)	68.1617	0.298016	1.22945	0.00367134	0.104102	1
Medtr3g092200	chr3	42112710..42114659	9.49274	0.461145	1.37663	0.00367006	0.104102	1
Medtr7g080610	chr7	complement(30686809..30692728)	10.2424	-0.408297	-1.32712	0.00367587	0.104172	1
Medtr3g092980	chr3	42500811..42503374	32.584	0.316125	1.24498	0.00368695	0.104427	1
Medtr8g014650	chr8	complement(4649758..4651673)	243.709	0.477998	1.39281	0.0037028	0.104817	1
Medtr1g069610	chr1	complement(30261145..30263456)	8.61386	0.415723	1.33397	0.00371254	0.105034	1
Medtr4g073240	chr4	complement(27698797..27700041)	60.5468	0.422228	1.34	0.00372269	0.105155	1
Medtr7g082860	chr7	31777246..31792673	4.46737	-0.328967	-1.25611	0.00372308	0.105155	1
Medtr7g111960	chr7	complement(46017512..46020803)	10.2998	-0.35399	-1.27809	0.00372199	0.105155	1
Medtr1g057790	chr1	25416121..25421208	67.7102	-0.295333	-1.22717	0.00372665	0.105197	1
Medtr3g055230	chr3	complement(21711227..21716998)	6.06826	-0.349499	-1.27412	0.00373825	0.105466	1
Medtr5g005450	chr5	complement(453088..457181)	7.21077	-0.483833	-1.39845	0.00374293	0.105539	1
Medtr2g091015	chr2	39135884..39140095	1.63753	-0.790138	-1.72924	0.00375302	0.105764	1
Medtr1g106085	chr1	complement(48016244..48020630)	12.1462	-0.401128	-1.32054	0.00376233	0.105967	1
Medtr2g035930	chr2	15235094..15235845	238.711	0.295646	1.22743	0.00376552	0.105998	1
Medtr1g070220	chr1	complement(30924506..30927350)	6.59232	-0.591099	-1.50639	0.00377678	0.106196	1
Medtr2g010180	chr2	2252213..2262748	14.4625	0.364195	1.28716	0.00377533	0.106196	1
Medtr3g058740	chr3	complement(23401271..23407002)	6.59704	0.402587	1.32188	0.00379035	0.106518	1
Medtr7g089120	chr7	34839307..34842729	130.913	0.346885	1.27181	0.00379309	0.106536	1
Medtr4g103650	chr4	complement(42846599..42847009)	6.98889	0.805859	1.74819	0.00380597	0.106838	1
Medtr5g094230	chr5	41156686..41163105	93.2747	-0.397325	-1.31706	0.00381142	0.106932	1
Medtr5g057990	chr5	23929835..23935782	44.8007	0.296918	1.22852	0.00382457	0.107181	1
Medtr6g004780	chr6	414288..418955	79.0621	-0.299551	-1.23076	0.00382434	0.107181	1
Medtr7g078150	chr7	complement(29547912..29548819)	5.50009	0.862445	1.81812	0.0038278	0.107212	1
Medtr4g072060	chr4	27331765..27334941	55.6457	0.30455	1.23503	0.00383349	0.107312	1
Medtr3g110720	chr3	complement(51750944..51753324)	296.548	0.290429	1.223	0.00384615	0.107607	1
Medtr5g071070	chr5	30120798..30124106	15.3304	-0.315259	-1.24424	0.00390103	0.109082	1
Medtr5g023340	chr5	complement(9292214..9293224)	0.981362	1.33583	2.5242	0.00390995	0.109271	1
Medtr5g029190	chr5	complement(12191690..12197103)	19.9128	-0.389777	-1.31019	0.00391504	0.109347	1
Medtr7g081815	chr7	31414463..31416061	4.95765	0.563604	1.47796	0.00391703	0.109347	1
Medtr4g088835	chr4	35439892..35444232	39.0382	-0.432963	-1.35	0.00393182	0.1097	1
Medtr2g096040	chr2	complement(40995178..40996157)	3.47229	-0.769983	-1.70525	0.00393899	0.109839	1
Medtr4g039740	chr4	14128546..14130863	21.8855	0.415637	1.33389	0.003984	0.111033	1
Medtr3g070290	chr3	31501481..31507102	4.95303	0.530157	1.44409	0.00398962	0.111128	1
Medtr3g461520	chr3	complement(24463573..24479182)	41.6814	-0.374871	-1.29672	0.0039976	0.111289	1
Medtr7g024880	chr7	complement(8233175..8233991)	16.3221	-0.717406	-1.64422	0.00400985	0.111568	1
Medtr1g082890	chr1	36885460..36890999	2.1579	0.614217	1.53073	0.00402176	0.111838	1
Medtr7g045650	chr7	16080002..16085525	30.2591	0.353062	1.27727	0.00402412	0.111842	1
Medtr6g028100	chr6	9995000..9999830	98.3122	-0.466249	-1.38151	0.00402663	0.11185	1
Medtr6g088260	chr6	complement(33407320..33412973)	3.4251	-0.469286	-1.38442	0.00404823	0.112388	1
Medtr1g075680	chr1	33531344..33535102	6.68007	0.412892	1.33135	0.00405106	0.112405	1
Medtr4g012610	chr4	complement(3345003..3345727)	2.09258	2.2696	4.8219	0.00407301	0.112952	1
Medtr1g088680	chr1	complement(39660482..39668018)	143.655	-0.334584	-1.26101	0.00407671	0.112992	1
Medtr7g026340	chr7	complement(8738374..8742328)	55.1064	0.298314	1.22971	0.00407952	0.113008	1
Medtr2g036460	chr2	complement(15778002..15780546)	21.2248	-0.381499	-1.3027	0.00410056	0.113528	1
Medtr8g080910	chr8	complement(34938642..34947024)	1.92089	0.566888	1.48132	0.00410848	0.113685	1
Medtr7g094750	chr7	37800281..37804964	17.9779	-0.304267	-1.23479	0.00412645	0.11412	1
Medtr0110s0050	scaffold0110	complement(32210..37420)	1.37486	0.891678	1.85533	0.00414262	0.114504	1
Medtr3g007600	chr3	1076692..1078073	24.0153	-0.396382	-1.3162	0.00414896	0.114617	1
Medtr3g014650	chr3	4192438..4197059	0.498206	1.3261	2.50725	0.00415445	0.114706	1
Medtr2g090950	chr2	complement(39065308..39066658)	36.1292	-0.309001	-1.23885	0.00416026	0.114803	1
Medtr1g041315	chr1	15380120..15381730	0.534261	6.91089	120.334	0.00418235	0.11535	1
Medtr2g062770	chr2	26517388..26524446	32.2392	0.296886	1.22849	0.0041927	0.115572	1
Medtr7g007320	chr7	complement(1430108..1435684)	13.8306	-0.379932	-1.30128	0.00420534	0.115831	1
Medtr8g467650	chr8	complement(24454850..24455746)	0.804323	6.77909	109.827	0.00420668	0.115831	1
Medtr7g077340	chr7	complement(29206470..29207054)	544.126	0.477235	1.39207	0.00421312	0.115915	1
Medtr8g009510	chr8	2212571..2220274	37.1584	-0.297972	-1.22942	0.00421434	0.115915	1
Medtr2g034370	chr2	13122707..13123426	28.7141	0.521689	1.43563	0.00422197	0.116062	1
Medtr8g079485	chr8	complement(34071471..34072716)	128.713	0.341445	1.26702	0.00422554	0.116097	1
Medtr2g019370	chr2	complement(6312834..6315290)	19.4862	0.537635	1.45159	0.00422808	0.116103	1
Medtr1g011800	chr1	2282936..2288081	14.8652	0.328173	1.25542	0.00423976	0.116297	1
Medtr4g061920	chr4	22950041..22950557	35.9201	0.616031	1.53265	0.00423842	0.116297	1
Medtr3g081040	chr3	complement(36704334..36706446)	0.559586	1.6857	3.21697	0.00424382	0.116345	1
Medtr7g076960	chr7	29066428..29067196	0.956765	6.80664	111.945	0.00424673	0.116362	1
Medtr2g084110	chr2	complement(35322014..35323288)	0.499644	2.03367	4.09444	0.00425232	0.116389	1
Medtr5g018570	chr5	6931244..6936289	21.2337	-0.326903	-1.25432	0.00425028	0.116389	1
Medtr1g064060	chr1	complement(28167732..28171238)	239.392	0.287811	1.22079	0.00427842	0.117039	1
Medtr7g016800	chr7	5309596..5311403	98.876	0.293395	1.22552	0.00429162	0.117337	1
Medtr4g120050	chr4	complement(49765244..49767507)	8.15908	0.411552	1.33012	0.00430123	0.117536	1
Medtr8g069350	chr8	complement(29023460..29024208)	2.87101	1.38346	2.60894	0.00431657	0.117891	1
Medtr8g038460	chr8	complement(14260862..14261400)	109.167	0.303847	1.23443	0.00433507	0.118332	1
Medtr0216s0030	scaffold0216	complement(13282..13875)	44.5855	0.466337	1.3816	0.00434163	0.118447	1
Medtr2g034810	chr2	complement(13355669..13359775)	4.26325	0.446728	1.36295	0.00435388	0.118653	1
Medtr4g033205	chr4	11561957..11565184	3.31753	-0.829806	-1.77745	0.00435167	0.118653	1
Medtr3g064460	chr3	complement(29037979..29040053)	52.1895	-0.297675	-1.22916	0.0043615	0.118797	1
Medtr2g015050	chr2	complement(4419705..4420718)	7.76883	-0.586409	-1.50151	0.00437356	0.118985	1
Medtr7g028432	chr7	9629542..9632793	13.344	-0.457485	-1.37315	0.00437786	0.118985	1
Medtr7g090160	chr7	complement(35388752..35393068)	13.6734	0.340184	1.26592	0.00437192	0.118985	1
Medtr8g042370	chr8	16329301..16331406	0.605357	6.79213	110.824	0.00437771	0.118985	1
Medtr8g086470	chr8	35875343..35877078	0.592988	-1.83361	-3.56427	0.00438232	0.119042	1
Medtr1g059690	chr1	25948219..25950325	118.531	0.295002	1.22689	0.00440368	0.119544	1
Medtr3g073080	chr3	32910193..32922374	26.3154	-0.294239	-1.22624	0.00440554	0.119544	1
Medtr7g077313	chr7	complement(29197402..29198076)	4.00137	1.14849	2.21682	0.00441288	0.119679	1
Medtr2g025120	chr2	8925945..8928216	144.534	-0.352234	-1.27654	0.00442651	0.119946	1
Medtr4g069070	chr4	25944704..25948830	10.8088	-0.428566	-1.34589	0.00442747	0.119946	1
Medtr7g051230	chr7	complement(17937729..17938695)	76.7917	0.298989	1.23028	0.00445904	0.120736	1
Medtr1g112270	chr1	complement(50782752..50790900)	12.7505	0.400784	1.32023	0.00447175	0.120957	1
Medtr7g105830	chr7	42966961..42971097	26.0424	0.360611	1.28397	0.00447199	0.120957	1
Medtr7g105320	chr7	complement(42689176..42690664)	1.4478	1.00616	2.00855	0.00447572	0.120993	1
Medtr2g069310	chr2	28791281..28795829	41.4867	0.291729	1.22411	0.00448028	0.121052	1
Medtr4g097700	chr4	complement(40328309..40330658)	0.411532	4.10218	17.1743	0.00448849	0.121208	1
Medtr4g084710	chr4	33015681..33017478	22.9258	0.310472	1.24011	0.00449647	0.121359	1
Medtr2g048900	chr2	21615900..21622152	28.2528	-0.300991	-1.23199	0.00450617	0.121491	1
Medtr5g011500	chr5	3314477..3323105	8.79139	0.357005	1.28076	0.00450401	0.121491	1
Medtr8g061360	chr8	21128686..21132763	13.5383	-0.56851	-1.48299	0.00450983	0.121525	1
Medtr7g100100	chr7	complement(40243268..40244051)	7.71422	0.720263	1.64748	0.0045162	0.121631	1
Medtr5g048470	chr5	21208958..21213009	160.29	-0.359862	-1.2833	0.00452733	0.121866	1
Medtr5g029770	chr5	12530976..12531938	25.562	0.389732	1.31015	0.004531	0.1219	1
Medtr6g091910	chr6	34625062..34627501	2.13852	-0.762853	-1.69684	0.00453551	0.121956	1
Medtr4g104470	chr4	complement(43221650..43224367)	23.1683	0.37474	1.29661	0.00453877	0.121978	1
Medtr1g114000	chr1	complement(51427705..51431328)	78.4768	0.292569	1.22482	0.00454186	0.121997	1
Medtr5g013030	chr5	complement(4089073..4090971)	53.1388	-0.29985	-1.23102	0.00456594	0.122578	1
Medtr4g021755	chr4	complement(7210484..7215110)	28.3568	-0.347005	-1.27192	0.00457008	0.122624	1
Medtr3g006280	chr3	612952..621261	1.02233	-0.622508	-1.53955	0.00459443	0.123212	1
Medtr1g103090	chr1	46642281..46643496	78.7033	-0.425373	-1.34292	0.00459922	0.123275	1
Medtr1g088860	chr1	complement(39785723..39786693)	14.7638	0.51361	1.42762	0.00460388	0.123334	1
Medtr3g097150	chr3	complement(44530901..44532250)	45.3314	0.300985	1.23199	0.00461595	0.123461	1
Medtr5g083750	chr5	complement(36125576..36129946)	18.6476	-0.38922	-1.30968	0.00461501	0.123461	1
Medtr6g011390	chr6	complement(3207208..3211704)	115.952	0.28965	1.22234	0.00461206	0.123461	1
Medtr1g115220	chr1	51907197..51909052	20.568	0.387425	1.30806	0.00462592	0.123559	1
Medtr2g435490	chr2	13713148..13713958	2934.99	-0.433756	-1.35075	0.00462744	0.123559	1
Medtr4g018850	chr4	complement(5822408..5823569)	0.671312	-1.9982	-3.995	0.00462744	0.123559	1
Medtr4g107370	chr4	44395192..44397070	2.72241	0.672291	1.5936	0.00463186	0.123559	1
Medtr5g087510	chr5	37923894..37925210	8.07852	-0.73167	-1.66056	0.00463128	0.123559	1
Medtr4g061360	chr4	22682971..22690792	27.1888	-0.294384	-1.22636	0.00463797	0.123656	1
Medtr4g130370	chr4	complement(54307709..54314660)	9.36262	-0.318083	-1.24667	0.00464453	0.123766	1
Medtr3g053710	chr3	21375806..21379583	0.237959	3.83014	14.2229	0.00468121	0.124677	1
Medtr6g016820	chr6	complement(6504286..6506900)	56.0829	-0.35875	-1.28231	0.00468546	0.124725	1
Medtr5g005330	chr5	complement(370640..371913)	15.5181	-0.403657	-1.32286	0.00468875	0.124747	1
Medtr0005s0130	scaffold0005	complement(204250..207720)	9.36037	-0.419531	-1.33749	0.00469931	0.124962	1
Medtr1g105655	chr1	47638290..47641699	7.61418	-0.457401	-1.37307	0.00470227	0.124974	1
Medtr1g027640	chr1	complement(9199322..9203571)	37.6649	-0.384094	-1.30504	0.00470609	0.12501	1
Medtr8g071815	chr8	complement(30295313..30295855)	1.29174	6.73803	106.746	0.00475368	0.126208	1
Medtr8g045490	chr8	complement(17779432..17781537)	1071.63	-0.352712	-1.27696	0.0047575	0.126243	1
Medtr4g035180	chr4	12055053..12057469	8.75069	-0.407685	-1.32656	0.00477306	0.126589	1
Medtr7g113130	chr7	complement(46559629..46566528)	112.734	-0.360319	-1.28371	0.0047771	0.126629	1
Medtr4g093070	chr4	36937907..36939904	1.672	-0.761449	-1.69519	0.00478472	0.126765	1
Medtr1g041695	chr1	complement(15637367..15646020)	102.632	-0.40556	-1.3246	0.00480872	0.127267	1
Medtr1g102370	chr1	complement(46229149..46230813)	10.4903	-0.443223	-1.35964	0.00480841	0.127267	1
Medtr7g026230	chr7	8686628..8691111	141.037	0.370918	1.29318	0.00481431	0.127348	1
Medtr5g090990	chr5	complement(39639631..39642769)	4.41369	-0.53049	-1.44442	0.00481719	0.127358	1
Medtr4g023260	chr4	complement(7834686..7840233)	15.4468	-0.384455	-1.30537	0.00482503	0.127498	1
Medtr3g100110	chr3	complement(45989935..45994485)	27.3972	-0.298249	-1.22965	0.00484496	0.127958	1
Medtr5g066320	chr5	27954430..27964188	8.25076	0.310848	1.24044	0.00485315	0.128107	1
Medtr2g016800	chr2	5209563..5210425	22.3566	-0.452193	-1.36812	0.00486193	0.128204	1
Medtr4g081500	chr4	complement(31613681..31615310)	24.4095	0.429027	1.34633	0.0048617	0.128204	1
Medtr4g415290	chr4	complement(4469708..4474758)	32.4101	-0.297387	-1.22892	0.00488105	0.128641	1
Medtr3g095040	chr3	complement(43385679..43387703)	23.1016	-0.505124	-1.41925	0.00489429	0.128721	1
Medtr4g093950	chr4	complement(37179506..37180366)	16.952	-0.488856	-1.40333	0.00489247	0.128721	1
Medtr0171s0010	scaffold0171	10159..12430	10.4972	-0.411682	-1.33024	0.00489125	0.128721	1
Medtr0428s0030	scaffold0428	complement(3510..9909)	81.5808	-0.418677	-1.3367	0.00488708	0.128721	1
Medtr1g031650	chr1	complement(11069080..11071368)	99.741	-0.292275	-1.22457	0.00490407	0.128911	1
Medtr1g041285	chr1	15350137..15352576	170.561	-0.288437	-1.22132	0.00491497	0.129131	1
Medtr3g062600	chr3	28292218..28293552	6.98032	0.692695	1.6163	0.0049227	0.129266	1
Medtr1g088840	chr1	complement(39760559..39762258)	22.2012	0.402938	1.3222	0.00493002	0.129328	1
Medtr7g007010	chr7	complement(1306469..1308334)	104.452	-0.422184	-1.33995	0.00493017	0.129328	1
Medtr8g015970	chr8	complement(5278558..5285746)	5.92254	-0.385486	-1.3063	0.00494408	0.129625	1
Medtr4g069550	chr4	complement(26179433..26182803)	117.248	0.449137	1.36522	0.00494743	0.129646	1
Medtr7g096280	chr7	38619056..38620408	108.136	0.288614	1.22147	0.00495509	0.129712	1
Medtr0043s0110	scaffold0043	complement(73081..75514)	3.33303	-0.660451	-1.58058	0.00495344	0.129712	1
Medtr2g104120	chr2	44863586..44866594	1.00011	0.866573	1.82333	0.00496854	0.129996	1
Medtr1g075720	chr1	33547954..33549648	207.491	0.285329	1.21869	0.00497898	0.130202	1
Medtr7g021010	chr7	6580663..6583753	5.35668	-0.627982	-1.5454	0.00498714	0.130348	1
Medtr1g103680	chr1	46933000..46934958	9.19378	0.420209	1.33812	0.0049998	0.130475	1
Medtr4g125710	chr4	complement(52168341..52171409)	14.3076	0.332419	1.25912	0.00500236	0.130475	1
Medtr5g035980	chr5	15642825..15644475	40.0644	-0.375945	-1.29769	0.00500073	0.130475	1
Medtr7g088520	chr7	complement(34485718..34486531)	7.1801	0.65176	1.57108	0.00499921	0.130475	1
Medtr1g022040	chr1	complement(6789887..6793507)	6.9294	0.455008	1.37079	0.00500702	0.130529	1
Medtr2g021190	chr2	complement(7168089..7169701)	11.2702	-0.411819	-1.33036	0.00502174	0.130778	1
Medtr2g023500	chr2	complement(8298020..8303233)	252.921	0.285181	1.21856	0.00502125	0.130778	1
Medtr2g072940	chr2	complement(30858113..30865683)	3.8644	-0.510567	-1.42461	0.0050451	0.131318	1
Medtr4g019210	chr4	complement(5964669..5969683)	5.54373	-0.472618	-1.38763	0.00504952	0.131366	1
Medtr5g080660	chr5	34522376..34523245	1.84774	1.10213	2.14671	0.00505252	0.131376	1
Medtr4g116410	chr4	48216261..48218581	196.031	0.285652	1.21896	0.00505627	0.131406	1
Medtr4g109580	chr4	45544168..45547694	17.0467	0.306623	1.23681	0.00506432	0.13148	1
Medtr8g064560	chr8	complement(27078693..27081258)	25.6199	0.297327	1.22887	0.00506244	0.13148	1
Medtr4g014140	chr4	3925507..3927338	6.26396	-0.745153	-1.67615	0.00508622	0.13198	1
Medtr1g012480	chr1	2486581..2488908	12.5153	-0.395577	-1.31547	0.00509567	0.132157	1
Medtr5g036240	chr5	15799895..15805647	7.90157	-0.401475	-1.32086	0.00510937	0.132445	1
Medtr8g033080	chr8	complement(12689232..12697305)	24.9826	-0.289976	-1.22262	0.00511824	0.132606	1
Medtr7g068220	chr7	complement(24925193..24929422)	18.543	-0.304719	-1.23518	0.00512486	0.132697	1
Medtr0147s0070	scaffold0147	22544..24566	168.64	0.287668	1.22067	0.005127	0.132697	1
Medtr7g112770	chr7	46406188..46408451	219.958	0.284817	1.21826	0.00513268	0.132756	1
Medtr8g079475	chr8	34042519..34047935	14.979	-0.356278	-1.28012	0.00513455	0.132756	1
Medtr1g049240	chr1	19021265..19021930	39.2866	-0.565359	-1.47976	0.00514388	0.132929	1
Medtr7g094250	chr7	complement(37507053..37512112)	2.33697	0.717514	1.64435	0.00515343	0.13304	1
Medtr7g106830	chr7	complement(43513083..43516177)	2.27463	-0.726146	-1.65421	0.00515108	0.13304	1
Medtr3g081500	chr3	36904409..36905059	23.9928	-0.423971	-1.34161	0.00515612	0.133041	1
Medtr7g098010	chr7	complement(39157329..39170242)	14.9618	-0.341189	-1.2668	0.00516569	0.13322	1
Medtr3g437680	chr3	12821900..12831667	73.8416	0.288829	1.22165	0.00518354	0.133544	1
Medtr3g108280	chr3	50021185..50023906	271.998	0.307132	1.23725	0.00518314	0.133544	1
Medtr6g088835	chr6	complement(33989403..33999113)	13.9037	-0.294461	-1.22643	0.00518664	0.133555	1
Medtr3g462090	chr3	complement(24757223..24758361)	1.22404	-7.26324	-153.622	0.0051984	0.13379	1
Medtr4g032865	chr4	complement(11362693..11363448)	1351.46	-0.418509	-1.33655	0.00520422	0.133871	1
Medtr6g015805	chr6	5476010..5480597	33.6422	-0.28914	-1.22191	0.00521934	0.134192	1
Medtr4g120030	chr4	49755377..49758094	6.65531	0.552336	1.46646	0.00523816	0.134607	1
Medtr1g112750	chr1	complement(51034375..51037041)	7.85159	0.499289	1.41352	0.00528347	0.135702	1
Medtr5g017410	chr5	complement(6340200..6341723)	5.19781	0.511571	1.4256	0.00532439	0.136684	1
Medtr4g112490	chr4	46023759..46024539	3.51564	0.790001	1.72908	0.00533778	0.136958	1
Medtr2g031610	chr2	complement(11955562..11958488)	51.9085	0.289261	1.22201	0.00535121	0.137233	1
Medtr2g085085	chr2	complement(36124476..36125832)	497.504	0.284459	1.21795	0.00536164	0.13743	1
Medtr4g114270	chr4	complement(47074988..47077517)	1.9676	-0.612891	-1.52932	0.00538544	0.13797	1
Medtr1g034360	chr1	complement(12515364..12520398)	44.0697	-0.290332	-1.22292	0.00538855	0.13798	1
Medtr3g079210	chr3	complement(35627567..35630248)	8.19521	0.521815	1.43576	0.00539782	0.138035	1
Medtr6g027810	chr6	9756875..9758624	173.968	0.282989	1.21671	0.00539929	0.138035	1
Medtr8g036920	chr8	13451828..13453471	50.6342	0.290882	1.22339	0.00540165	0.138035	1
Medtr0365s0030	scaffold0365	11270..14964	1.68036	-0.661985	-1.58226	0.00540134	0.138035	1
Medtr2g438400	chr2	complement(15493321..15496218)	0.844472	-1.17983	-2.26551	0.00542948	0.138676	1
Medtr4g133640	chr4	55907276..55909075	0.228551	2.45679	5.48995	0.00543732	0.138759	1
Medtr7g091370	chr7	36075721..36078246	35.7783	-0.446565	-1.36279	0.00543823	0.138759	1
Medtr1g074370	chr1	33042222..33043578	17.6386	-0.423029	-1.34074	0.00546894	0.139472	1
Medtr1g035720	chr1	complement(13039278..13041781)	3.33422	-0.769443	-1.70461	0.00548284	0.139756	1
Medtr1g099500	chr1	complement(44945008..44947117)	0.94405	1.30947	2.4785	0.00551362	0.140469	1
Medtr1g115535	chr1	complement(52215897..52220285)	79.3761	-0.285329	-1.21869	0.00551969	0.140553	1
Medtr6g084900	chr6	complement(31950304..31951125)	35.8863	-0.357296	-1.28102	0.00553766	0.140939	1
Medtr8g085280	chr8	complement(35303214..35321195)	5.64175	-0.366094	-1.28886	0.00554664	0.141097	1
Medtr2g085370	chr2	33185990..33186826	15.7644	0.478538	1.39333	0.00556705	0.141545	1
Medtr6g008620	chr6	2348811..2352387	102.992	-0.328288	-1.25552	0.00559163	0.142026	1
Medtr8g093770	chr8	complement(39232241..39234618)	240.181	0.281463	1.21543	0.00558967	0.142026	1
Medtr2g063460	chr2	26745358..26750617	35.4318	-0.287143	-1.22022	0.00560008	0.142169	1
Medtr3g056590	chr3	complement(22618824..22621932)	4.00988	-0.472024	-1.38705	0.00560559	0.142238	1
Medtr1g028560	chr1	9676743..9678418	3.92188	0.581018	1.4959	0.00561931	0.142442	1
Medtr4g114030	chr4	46918728..46924991	51.2446	0.291914	1.22426	0.00561691	0.142442	1
Medtr7g096660	chr7	complement(38792894..38793298)	1.59664	6.62114	98.4381	0.00563003	0.142642	1
Medtr4g106810	chr4	complement(44090477..44094767)	24.323	-0.294558	-1.22651	0.00563618	0.142721	1
Medtr7g107350	chr7	complement(43788689..43803096)	8.73889	-0.297989	-1.22943	0.0056388	0.142721	1
Medtr7g082140	chr7	complement(31460852..31465655)	27.8184	-0.361584	-1.28484	0.00564711	0.142857	1
Medtr7g092250	chr7	complement(36534180..36538356)	0.127899	2.30687	4.94809	0.00564982	0.142857	1
Medtr1g077930	chr1	34830529..34835342	4.45422	0.533612	1.44755	0.00565994	0.143041	1
Medtr2g100070	chr2	complement(42959408..42965304)	2.54159	0.63662	1.55468	0.00567045	0.143235	1
Medtr8g066280	chr8	27543940..27544755	1.35762	1.44378	2.72032	0.00567362	0.143243	1
Medtr3g086520	chr3	complement(39200567..39204931)	74.2689	-0.282699	-1.21647	0.00568038	0.143342	1
[truncated: 48,445 more rows]

## Sheet: Fold change 2 or more
Name	Chromosome	Region	Max group mean	Log₂ fold change	Fold change	P-value	FDR p-value	Bonferroni
Medtr1g009270	chr1	1253486..1256331	5.91361	2.86094	7.2649	0	0	0
Medtr1g017910	chr1	complement(5105397..5107858)	11.8901	3.68453	12.8574	0	0	0
Medtr1g028600	chr1	complement(9698155..9700150)	240.306	9.85185	924.062	0	0	0
Medtr1g030660	chr1	10679998..10681898	21.5013	7.04338	131.907	0	0	0
Medtr1g036410	chr1	complement(13347344..13350444)	70.0629	10.1301	1120.63	0	0	0
Medtr1g040500	chr1	18617585..18620810	66.6615	6.59305	96.5398	0	0	0
Medtr1g050525	chr1	19535521..19546370	5.51256	3.6216	12.3086	0	0	0
Medtr1g050550	chr1	complement(19712167..19714149)	6.74574	2.15576	4.45604	0	0	0
Medtr1g069725	chr1	complement(30383115..30384606)	7.6981	3.532	11.5674	0	0	0
Medtr1g471050	chr1	31456119..31465321	46.0304	2.84395	7.17985	0	0	0
Medtr1g075550	chr1	complement(33461452..33462419)	21.3828	4.80583	27.9704	0	0	0
Medtr1g076830	chr1	34296146..34297881	12.6385	8.20235	294.546	0	0	0
Medtr1g079120	chr1	complement(35169860..35172293)	7.13455	6.62136	98.453	0	0	0
Medtr1g080820	chr1	complement(35952385..35953845)	39.4419	2.69563	6.47837	0	0	0
Medtr1g081625	chr1	36286105..36289258	33.1701	8.22856	299.946	0	0	0
Medtr1g081640	chr1	36291162..36294871	10.2398	6.1116	69.1474	0	0	0
Medtr1g086550	chr1	complement(38725663..38728964)	20.2202	1.97936	3.94318	0	0	0
Medtr1g090707	chr1	complement(40695752..40698515)	20.4013	8.19003	292.041	0	0	0
Medtr1g090737	chr1	40755090..40757757	20.0428	8.84311	459.243	0	0	0
Medtr1g098300	chr1	44246833..44250756	5.77939	3.52046	11.4753	0	0	0
Medtr1g101370	chr1	complement(45784401..45787692)	3.13028	5.21104	37.0406	0	0	0
Medtr1g109110	chr1	49299945..49302477	30.1777	7.40534	169.524	0	0	0
Medtr2g008470	chr2	1491577..1496418	19.1141	1.64101	3.11884	0	0	0
Medtr2g008740	chr2	1594358..1596027	11.2821	8.45733	351.488	0	0	0
Medtr2g012790	chr2	complement(3291925..3293201)	28.0068	2.95126	7.73424	0	0	0
Medtr2g016730	chr2	complement(5172338..5173691)	7.57204	5.77009	54.5721	0	0	0
Medtr2g017750	chr2	5457521..5460670	27.9275	7.86493	233.12	0	0	0
Medtr2g023150	chr2	8109366..8111042	11.9779	3.15049	8.8796	0	0	0
Medtr2g030855	chr2	complement(11671573..11672658)	36.9714	7.27859	155.266	0	0	0
Medtr2g031270	chr2	complement(11719359..11720872)	19.2897	4.44183	21.7333	0	0	0
Medtr2g438310	chr2	complement(15449032..15450544)	19.5428	2.25358	4.76865	0	0	0
Medtr2g438320	chr2	complement(15458115..15459893)	16.129	2.1837	4.54316	0	0	0
Medtr2g044100	chr2	complement(19173412..19176099)	38.076	3.82096	14.1326	0	0	0
Medtr2g461970	chr2	complement(25632722..25636216)	52.9374	1.78521	3.44669	0	0	0
Medtr2g062430	chr2	26354832..26357000	5.57035	3.19774	9.17518	0	0	0
Medtr2g062560	chr2	26410129..26414001	5.56619	3.10012	8.57491	0	0	0
Medtr2g070120	chr2	complement(29504938..29505698)	92.541	5.292	39.1788	0	0	0
Medtr2g072260	chr2	30390835..30396174	10.7834	4.87872	29.42	0	0	0
Medtr2g081600	chr2	complement(34243268..34243690)	14.9376	5.66009	50.5659	0	0	0
Medtr2g086620	chr2	36420900..36421618	24.0245	7.86759	233.55	0	0	0
Medtr2g086630	chr2	36424379..36425295	137.199	10.4333	1382.7	0	0	0
Medtr2g089100	chr2	37602592..37604640	6.98008	2.10874	4.31314	0	0	0
Medtr2g089380	chr2	37768309..37769290	13.1133	5.65067	50.2367	0	0	0
Medtr2g091215	chr2	complement(39347443..39348176)	356.266	8.05122	265.251	0	0	0
Medtr2g098490	chr2	complement(42123120..42131459)	17.9568	8.68927	412.791	0	0	0
Medtr2g101920	chr2	43851532..43855716	75.3086	5.23437	37.6447	0	0	0
Medtr2g104800	chr2	45169879..45170681	19.2816	5.40936	42.499	0	0	0
Medtr3g009880	chr3	2195853..2197674	20.1706	8.78106	439.91	0	0	0
Medtr3g011630	chr3	complement(2923472..2926629)	8.45985	3.35856	10.2572	0	0	0
Medtr3g014500	chr3	4123569..4124231	9.72514	3.67534	12.7758	0	0	0
Medtr3g020880	chr3	6055504..6056068	40.7897	3.16821	8.98929	0	0	0
Medtr3g021440	chr3	complement(6281562..6285674)	37.8276	3.23557	9.41896	0	0	0
Medtr3g022830	chr3	complement(6858778..6862026)	14.8934	5.19781	36.7027	0	0	0
Medtr3g045440	chr3	complement(14781798..14783516)	8.32174	6.06192	66.8066	0	0	0
Medtr3g057910	chr3	complement(22918706..22920775)	15.4711	2.47393	5.55554	0	0	0
Medtr3g057980	chr3	22939282..22941877	9.3125	4.76872	27.2602	0	0	0
Medtr3g058060	chr3	complement(22971128..22973864)	13.4283	1.99224	3.97854	0	0	0
Medtr3g058390	chr3	complement(23145718..23147439)	10.6249	5.5423	46.6013	0	0	0
Medtr3g467150	chr3	complement(27678809..27680826)	6.85333	4.0492	16.5551	0	0	0
Medtr3g076630	chr3	34442945..34446106	100.67	1.61101	3.05466	0	0	0
Medtr3g079190	chr3	complement(35616738..35620265)	30.5236	9.29653	628.832	0	0	0
Medtr3g079570	chr3	complement(35913328..35916356)	86.7849	9.8452	919.815	0	0	0
Medtr3g079590	chr3	complement(35919897..35922606)	149.431	5.6233	49.2925	0	0	0
Medtr3g079600	chr3	complement(35926473..35929278)	24.6961	8.95161	495.111	0	0	0
Medtr3g079620	chr3	complement(35933297..35935921)	67.6036	8.5152	365.873	0	0	0
Medtr3g079630	chr3	complement(35938953..35941471)	14.7367	6.33375	80.6582	0	0	0
Medtr3g081140	chr3	complement(36751136..36752470)	84.8925	8.61641	392.461	0	0	0
Medtr3g082200	chr3	complement(37105455..37112701)	11.3604	1.98795	3.96674	0	0	0
Medtr3g083630	chr3	37749162..37751789	70.8061	3.22748	9.36633	0	0	0
Medtr3g086430	chr3	39152403..39158029	7.64102	6.00897	64.399	0	0	0
Medtr3g088965	chr3	complement(40724514..40725497)	46.7902	8.97952	504.783	0	0	0
Medtr3g090540	chr3	41032284..41035035	7.70393	7.37691	166.216	0	0	0
Medtr3g093270	chr3	complement(42630099..42632312)	7.79864	3.44079	10.8588	0	0	0
Medtr3g098650	chr3	complement(45061132..45068920)	5.9512	2.12732	4.36904	0	0	0
Medtr3g104820	chr3	complement(48315579..48317619)	9.10709	4.64596	25.0365	0	0	0
Medtr3g104900	chr3	48354290..48358260	11.1599	5.78063	54.9723	0	0	0
Medtr3g107800	chr3	complement(49733848..49739431)	1.84144	3.57982	11.9573	0	0	0
Medtr3g107810	chr3	complement(49743944..49747415)	598.198	9.83261	911.82	0	0	0
Medtr3g107830	chr3	49753901..49755581	174.605	5.68552	51.465	0	0	0
Medtr3g111900	chr3	52372230..52374345	51.1007	2.69196	6.46192	0	0	0
Medtr3g112460	chr3	52711485..52714657	13.0049	6.30401	79.0124	0	0	0
Medtr3g115940	chr3	54198460..54202630	29.916	1.5359	2.8997	0	0	0
Medtr3g118160	chr3	55299989..55307292	9.72607	5.11671	34.6963	0	0	0
Medtr4g005270	chr4	154297..167405	2.1161	6.2283	74.9731	0	0	0
Medtr4g011120	chr4	2621072..2621719	12.2334	5.01767	32.3944	0	0	0
Medtr4g011800	chr4	complement(2984165..2985715)	22.0799	5.01961	32.438	0	0	0
Medtr4g035250	chr4	complement(12078303..12087672)	7.37192	6.83769	114.38	0	0	0
Medtr4g047610	chr4	complement(16867071..16868445)	14.827	8.88603	473.11	0	0	0
Medtr4g052770	chr4	complement(19144060..19144939)	236.738	9.54293	745.949	0	0	0
Medtr4g052780	chr4	19148105..19148728	86.9515	9.19122	584.566	0	0	0
Medtr4g053630	chr4	19418613..19424375	70.9052	2.72823	6.6264	0	0	0
Medtr4g066130	chr4	complement(24927763..24936093)	10.2659	2.73506	6.65787	0	0	0
Medtr4g075590	chr4	28885867..28887300	8.83674	6.07214	67.2815	0	0	0
Medtr4g076150	chr4	complement(29142393..29143053)	54.492	9.38659	669.337	0	0	0
Medtr4g077180	chr4	29568981..29569791	317.556	10.1915	1169.35	0	0	0
Medtr4g478140	chr4	29990964..29992340	105.36	1.53725	2.90241	0	0	0
Medtr4g079470	chr4	complement(30719276..30720667)	9.84351	6.89257	118.815	0	0	0
Medtr4g079770	chr4	30880789..30882078	13.4087	8.61511	392.109	0	0	0
Medtr4g080730	chr4	complement(31193936..31195577)	3.71569	4.43272	21.5964	0	0	0
Medtr4g081190	chr4	31437802..31442803	46.9546	4.51547	22.8713	0	0	0
Medtr4g084800	chr4	33052678..33054151	32.334	2.65344	6.29165	0	0	0
Medtr4g093845	chr4	37290020..37293626	9.47391	8.8175	451.162	0	0	0
Medtr4g094515	chr4	38124942..38130679	3.08036	3.77856	13.7233	0	0	0
Medtr4g097510	chr4	40182691..40183556	23.4302	8.46586	353.571	0	0	0
Medtr4g097830	chr4	complement(40376868..40379458)	6.24915	5.45498	43.8643	0	0	0
Medtr4g102400	chr4	42444311..42446870	15.3795	3.55499	11.7533	0	0	0
Medtr4g104750	chr4	43395065..43400061	7.117	3.94854	15.4393	0	0	0
Medtr4g105090	chr4	43538822..43541072	7.80132	4.87021	29.247	0	0	0
Medtr4g107930	chr4	complement(44730694..44732137)	11.6271	7.4216	171.444	0	0	0
Medtr4g108170	chr4	44858044..44867506	2.24825	4.76554	27.2001	0	0	0
Medtr4g116640	chr4	complement(48295308..48295565)	40.8122	7.54238	186.415	0	0	0
Medtr4g117950	chr4	complement(48950939..48952363)	12.9029	7.65561	201.636	0	0	0
Medtr4g118000	chr4	complement(48973662..48975250)	13.9521	9.09225	545.808	0	0	0
Medtr4g118840	chr4	49246937..49248284	12.08	7.06347	133.757	0	0	0
Medtr4g129010	chr4	complement(53681519..53683592)	31.762	1.94337	3.84604	0	0	0
Medtr5g010590	chr5	2869609..2871940	42.4149	2.82534	7.08781	0	0	0
Medtr5g011260	chr5	complement(3201249..3203584)	12.9009	8.12344	278.869	0	0	0
Medtr5g011270	chr5	complement(3207276..3209558)	29.7713	10.7065	1671.04	0	0	0
Medtr5g011320	chr5	complement(3225135..3227381)	35.2582	6.04646	66.0945	0	0	0
Medtr5g011340	chr5	complement(3230229..3232644)	34.5492	9.028	522.034	0	0	0
Medtr5g018320	chr5	complement(6821734..6823692)	18.2829	2.77324	6.83644	0	0	0
Medtr5g018610	chr5	6948080..6949174	53.8623	4.65959	25.2741	0	0	0
Medtr5g019460	chr5	complement(7340535..7341789)	33.1459	2.3285	5.02282	0	0	0
Medtr5g020810	chr5	7969752..7973533	8.84801	8.9625	498.863	0	0	0
Medtr5g030910	chr5	13231057..13235148	13.9139	4.07436	16.8463	0	0	0
Medtr5g031030	chr5	13308133..13309153	88.6275	9.70608	835.257	0	0	0
Medtr5g031090	chr5	13333297..13334335	126.272	9.85921	928.794	0	0	0
Medtr5g031100	chr5	13336383..13337441	128.429	9.74155	856.05	0	0	0
Medtr5g031120	chr5	13339729..13340877	47.9642	10.3972	1348.56	0	0	0
Medtr5g031140	chr5	13345509..13346369	48.9342	9.50185	725.004	0	0	0
Medtr5g031160	chr5	13354203..13355702	35.422	9.18794	583.237	0	0	0
Medtr5g033510	chr5	complement(14432472..14434198)	5.40385	5.43215	43.1757	0	0	0
Medtr5g035640	chr5	15508476..15508987	288.266	9.58895	770.124	0	0	0
Medtr5g035650	chr5	15513610..15514041	86.8086	10.6342	1589.37	0	0	0
Medtr5g043550	chr5	complement(19135605..19136489)	15.2981	7.51376	182.754	0	0	0
Medtr5g045470	chr5	complement(19949151..19949959)	124.569	4.33822	20.2271	0	0	0
Medtr5g063620	chr5	complement(26358380..26358923)	103.837	3.19527	9.15949	0	0	0
Medtr5g063930	chr5	complement(26517983..26519938)	24.0942	9.17407	577.658	0	0	0
Medtr5g075400	chr5	complement(32052824..32055351)	14.2744	3.95731	15.5335	0	0	0
Medtr5g075520	chr5	32112561..32114173	135.861	9.45634	702.492	0	0	0
Medtr5g076900	chr5	complement(32800849..32802657)	376.99	9.49807	723.108	0	0	0
Medtr5g092150	chr5	complement(40242651..40245124)	18.8743	1.65917	3.15835	0	0	0
Medtr6g004000	chr6	complement(58842..60515)	15.6232	3.41519	10.6678	0	0	0
Medtr6g005630	chr6	863153..867302	5.02024	3.55352	11.7413	0	0	0
Medtr6g011490	chr6	complement(3269777..3271820)	18.8929	6.64108	99.8078	0	0	0
Medtr6g012970	chr6	4038451..4039828	38.4121	2.90172	7.47316	0	0	0
Medtr6g012980	chr6	complement(4042934..4048518)	3.66916	3.77667	13.7054	0	0	0
Medtr6g013440	chr6	4258723..4260289	6.59639	5.2042	36.8655	0	0	0
Medtr6g013450	chr6	4265607..4267301	9.79827	4.14687	17.7146	0	0	0
Medtr6g015020	chr6	4863345..4867174	60.0662	1.66137	3.16317	0	0	0
Medtr6g015950	chr6	complement(5625967..5630667)	57.9796	1.41994	2.67575	0	0	0
Medtr6g021915	chr6	complement(7571244..7575111)	30.8932	1.94241	3.84348	0	0	0
Medtr6g027840	chr6	9767853..9770137	31.4543	2.2605	4.79159	0	0	0
Medtr6g029180	chr6	10029743..10030984	15.1784	1.70827	3.2677	0	0	0
Medtr6g034940	chr6	complement(12228075..12232530)	48.1123	9.86706	933.858	0	0	0
Medtr6g043700	chr6	complement(13228759..13230010)	11.7163	4.64574	25.0326	0	0	0
Medtr6g037750	chr6	13470318..13474508	1.68018	5.90988	60.1246	0	0	0
Medtr6g051860	chr6	complement(18052428..18058032)	5.40273	5.78422	55.1091	0	0	0
Medtr6g053600	chr6	complement(19290698..19296806)	20.842	6.22696	74.9037	0	0	0
Medtr6g056070	chr6	20114959..20118282	6.6547	4.81907	28.2283	0	0	0
Medtr6g462640	chr6	complement(21779283..21781458)	18.2901	3.11266	8.64975	0	0	0
Medtr6g079630	chr6	29058520..29059610	12.5349	3.46641	11.0533	0	0	0
Medtr6g091960	chr6	complement(34662520..34672093)	1.89352	5.97108	62.73	0	0	0
Medtr7g012350	chr7	complement(3617235..3617986)	10.021	6.12924	69.9978	0	0	0
Medtr7g027190	chr7	complement(9072111..9074523)	16.9354	9.72065	843.739	0	0	0
Medtr7g062570	chr7	complement(22774969..22776837)	22.1852	9.19598	586.498	0	0	0
Medtr7g062580	chr7	complement(22778100..22780881)	214.611	1.3146	2.48733	0	0	0
Medtr7g066070	chr7	complement(24026681..24028382)	28.3253	8.10684	275.677	0	0	0
Medtr7g068600	chr7	25143946..25146531	191.325	9.42393	686.888	0	0	0
Medtr7g070800	chr7	26203521..26205009	8.30483	5.75863	54.1403	0	0	0
Medtr7g070810	chr7	26207053..26208516	8.98642	6.06152	66.7881	0	0	0
Medtr7g071840	chr7	26649175..26649936	54.1794	3.4947	11.2722	0	0	0
Medtr7g071970	chr7	26716633..26717220	108.592	4.33828	20.228	0	0	0
Medtr7g076920	chr7	complement(29057951..29058722)	10.3526	4.46131	22.0286	0	0	0
Medtr7g077050	chr7	29101739..29102299	9.48196	5.05881	33.3313	0	0	0
Medtr7g077110	chr7	29115837..29116668	19.4366	4.07347	16.836	0	0	0
Medtr7g080950	chr7	complement(30853026..30856592)	11.6599	2.18444	4.5455	0	0	0
Medtr7g082660	chr7	31690719..31693405	4.54915	2.78248	6.88036	0	0	0
Medtr7g086100	chr7	complement(33399140..33400207)	15.514	8.3891	335.251	0	0	0
Medtr7g086140	chr7	complement(33410034..33411040)	41.9525	9.31101	635.173	0	0	0
Medtr7g086160	chr7	complement(33415916..33416902)	28.7621	8.04199	263.56	0	0	0
Medtr7g086190	chr7	complement(33423956..33424961)	40.386	8.85261	462.276	0	0	0
Medtr7g086220	chr7	complement(33436074..33436997)	47.9196	9.91419	964.869	0	0	0
Medtr7g092620	chr7	36733390..36735626	15.3973	3.34239	10.1429	0	0	0
Medtr7g098040	chr7	complement(39176359..39179545)	9.06797	4.25784	19.131	0	0	0
Medtr7g098160	chr7	complement(39222635..39225457)	5.22756	6.05928	66.6847	0	0	0
Medtr7g100990	chr7	complement(40732629..40734227)	8.53082	2.8508	7.21402	0	0	0
Medtr7g102840	chr7	complement(41306750..41310540)	10.1141	6.98141	126.361	0	0	0
Medtr7g102460	chr7	41516988..41518754	18.5066	7.55583	188.161	0	0	0
Medtr7g105570	chr7	42818404..42819772	28.9599	2.8097	7.01137	0	0	0
Medtr7g112963	chr7	complement(46481124..46491194)	8.97857	2.25804	4.78343	0	0	0
Medtr7g114870	chr7	complement(47426124..47428870)	3.55355	6.17847	72.4276	0	0	0
Medtr7g115740	chr7	47870184..47872190	3.30928	3.99134	15.9043	0	0	0
Medtr7g116650	chr7	48165459..48168646	13.3602	4.81668	28.1817	0	0	0
Medtr7g117280	chr7	48446488..48452243	12.996	2.05281	4.14912	0	0	0
Medtr8g006790	chr8	complement(970171..976661)	69.5834	9.42469	687.25	0	0	0
Medtr8g010030	chr8	complement(2516139..2519414)	5.42015	4.49104	22.4873	0	0	0
Medtr8g012805	chr8	3818423..3819345	62.2221	9.63614	795.73	0	0	0
Medtr8g012835	chr8	3859859..3860744	182.947	9.61725	785.381	0	0	0
Medtr8g018650	chr8	complement(6408474..6412307)	51.9971	1.99099	3.97509	0	0	0
Medtr8g022270	chr8	complement(7861470..7869135)	23.3814	5.82804	56.8087	0	0	0
Medtr8g031150	chr8	11640537..11641359	90.6	9.97643	1007.41	0	0	0
Medtr8g036050	chr8	complement(13202212..13204086)	20.7707	3.28264	9.73132	0	0	0
Medtr8g038210	chr8	complement(14166012..14171188)	39.389	1.7347	3.32811	0	0	0
Medtr8g038220	chr8	complement(14173121..14175833)	42.7477	2.20334	4.60545	0	0	0
Medtr8g461050	chr8	complement(21370419..21371027)	72.8713	9.21606	594.716	0	0	0
Medtr8g059790	chr8	complement(21934174..21934926)	80.1306	9.1128	553.639	0	0	0
Medtr8g055940	chr8	complement(24367089..24368154)	9.16635	6.49052	89.9167	0	0	0
Medtr8g468920	chr8	complement(24988727..24991304)	16.7248	7.9429	246.066	0	0	0
Medtr8g064840	chr8	27209650..27211771	8.87123	2.43017	5.38958	0	0	0
Medtr8g065720	chr8	complement(27336280..27338265)	5.55118	2.95463	7.75235	0	0	0
Medtr8g067940	chr8	complement(28308642..28309525)	20.668	8.29128	313.273	0	0	0
Medtr8g068030	chr8	28333693..28334711	129.251	10.0307	1046	0	0	0
Medtr8g068050	chr8	complement(28341199..28343412)	5.70493	2.08495	4.24261	0	0	0
Medtr8g068265	chr8	28466086..28471025	25.733	2.3736	5.18233	0	0	0
Medtr8g068530	chr8	complement(28597194..28600951)	11.7059	7.40213	169.147	0	0	0
Medtr8g069775	chr8	29426353..29428952	4.46793	4.16435	17.9306	0	0	0
Medtr8g071050	chr8	complement(30137402..30140758)	18.8041	7.80697	223.94	0	0	0
Medtr8g074560	chr8	31526639..31528424	23.5287	9.46701	707.707	0	0	0
Medtr8g075330	chr8	31848061..31856341	17.5625	2.35121	5.10251	0	0	0
Medtr8g075990	chr8	32142751..32146250	3.866	5.28522	38.995	0	0	0
Medtr8g083170	chr8	35105064..35112698	8.48151	5.84543	57.4975	0	0	0
Medtr8g087420	chr8	36124011..36126346	5.93882	6.95872	124.39	0	0	0
Medtr8g087710	chr8	36261986..36264406	73.623	3.71878	13.1663	0	0	0
Medtr8g087780	chr8	36321984..36325169	14.1661	8.39554	336.75	0	0	0
Medtr8g091690	chr8	38261626..38263335	27.668	7.23758	150.914	0	0	0
Medtr8g091720	chr8	38281269..38282267	7.82281	4.71787	26.316	0	0	0
Medtr8g092290	chr8	38559311..38563785	7.51976	8.39703	337.099	0	0	0
Medtr8g103227	chr8	43449553..43456981	7.64869	4.42919	21.5437	0	0	0
Medtr8g103233	chr8	43461498..43464017	2.87865	3.7639	13.5846	0	0	0
Medtr8g107250	chr8	45318751..45321187	25.3467	2.94266	7.6883	0	0	0
Medtr8g107450	chr8	45426242..45429972	17.4095	4.74396	26.7963	0	0	0
Medtr8g107510	chr8	45457929..45461875	5.39174	2.69131	6.45898	0	0	0
Medtr0011s0280	scaffold0011	229705..232158	89.3553	2.48824	5.61092	0	0	0
Medtr0021s0370	scaffold0021	158580..161378	214.804	2.14237	4.41486	0	0	0
Medtr0055s0080	scaffold0055	30838..31389	13.4725	3.79311	13.8625	0	0	0
Medtr0205s0040	scaffold0205	complement(12718..21736)	17.6698	9.88277	944.081	0	0	0
Medtr0211s0080	scaffold0211	complement(25794..26510)	51.3137	8.95478	496.201	0	0	0
Medtr0262s0060	scaffold0262	complement(15322..17184)	15.1729	2.72928	6.63124	0	0	0
Medtr0536s0010	scaffold0536	470..1930	6.39152	6.6581	100.992	0	0	0
Medtr4g021725	chr4	complement(7153291..7155063)	2548.68	1.04352	2.06125	1.11022e-16	2.27659e-14	5.60041e-12
Medtr4g104020	chr4	43029167..43030858	17.899	10.3303	1287.46	1.11022e-16	2.27659e-14	5.60041e-12
Medtr6g006990	chr6	1322138..1326461	2.82291	5.68528	51.4564	1.11022e-16	2.27659e-14	5.60041e-12
Medtr8g033380	chr8	complement(12871549..12874562)	6.60289	3.13932	8.81111	1.11022e-16	2.27659e-14	5.60041e-12
Medtr2g090240	chr2	38343844..38346083	56.0798	1.39643	2.63249	2.22045e-16	4.49832e-14	1.12008e-11
Medtr3g078623	chr3	35438534..35441319	2.87701	6.33146	80.5304	2.22045e-16	4.49832e-14	1.12008e-11
Medtr3g109610	chr3	51268479..51271917	43.7695	1.48833	2.80565	2.22045e-16	4.49832e-14	1.12008e-11
Medtr3g020970	chr3	complement(6085321..6086366)	54.3105	1.70709	3.26502	4.44089e-16	8.88954e-14	2.24016e-11
Medtr4g133010	chr4	55649383..55649985	17.2969	8.01391	258.481	4.44089e-16	8.88954e-14	2.24016e-11
Medtr7g108815	chr7	44442430..44443124	7.9192	5.66673	50.7992	4.44089e-16	8.88954e-14	2.24016e-11
Medtr4g094535	chr4	complement(38176632..38179308)	4.95882	2.90266	7.47802	5.55112e-16	1.09383e-13	2.8002e-11
Medtr7g033325	chr7	complement(11911787..11914483)	10.0136	1.84258	3.5865	5.55112e-16	1.09383e-13	2.8002e-11
Medtr7g070870	chr7	26226485..26228070	2.83571	4.05367	16.6064	5.55112e-16	1.09383e-13	2.8002e-11
Medtr0083s0100	scaffold0083	45281..49347	8.1545	1.64765	3.13324	5.55112e-16	1.09383e-13	2.8002e-11
Medtr4g074130	chr4	28190446..28193469	3.81465	3.81755	14.0993	7.77156e-16	1.51362e-13	3.92029e-11
Medtr8g060550	chr8	complement(21403659..21404261)	12.3573	7.02035	129.818	7.77156e-16	1.51362e-13	3.92029e-11
Medtr8g087810	chr8	36328886..36332433	6.10712	8.06598	267.98	7.77156e-16	1.51362e-13	3.92029e-11
Medtr7g086230	chr7	complement(33441805..33442422)	18.0311	7.88942	237.111	9.99201e-16	1.9386e-13	5.04037e-11
Medtr3g099740	chr3	45724895..45726696	11.2523	2.16321	4.47911	1.22125e-15	2.34238e-13	6.16045e-11
Medtr4g126930	chr4	52599413..52602267	3.10742	4.09372	17.0739	1.22125e-15	2.34238e-13	6.16045e-11
Medtr7g028805	chr7	9930700..9931125	9.09538	4.76372	27.1658	1.22125e-15	2.34238e-13	6.16045e-11
Medtr3g014870	chr3	4294893..4295552	36.7102	10.0063	1028.51	1.33227e-15	2.54564e-13	6.72049e-11
Medtr5g044220	chr5	19437916..19441546	17.5861	1.6971	3.24248	1.55431e-15	2.95871e-13	7.84057e-11
Medtr4g075150	chr4	28685986..28692813	41.2438	1.33725	2.52669	1.9984e-15	3.78975e-13	1.00807e-10
Medtr4g102310	chr4	complement(42392718..42394804)	11.5133	9.88637	946.439	2.22045e-15	4.17941e-13	1.12008e-10
Medtr6g073090	chr6	27150313..27151482	14.5075	7.07648	134.969	2.22045e-15	4.17941e-13	1.12008e-10
Medtr5g083030	chr5	35819773..35821937	4.07869	2.58502	6.00024	2.88658e-15	5.41303e-13	1.45611e-10
Medtr7g105460	chr7	42767773..42769796	9.05958	2.55779	5.88803	4.10783e-15	7.67463e-13	2.07215e-10
Medtr7g086090	chr7	complement(33395401..33397154)	29.0076	9.88954	948.522	5.21805e-15	9.71289e-13	2.63219e-10
Medtr2g437880	chr2	14956039..14961072	7.42958	2.65275	6.28864	5.66214e-15	1.05008e-12	2.85621e-10
Medtr2g042570	chr2	18566744..18571686	1.68357	4.78263	27.5241	6.99441e-15	1.2924e-12	3.52826e-10
Medtr2g096840	chr2	41387108..41388947	12.702	3.02606	8.14583	8.32667e-15	1.53296e-12	4.20031e-10
Medtr4g102280	chr4	complement(42375953..42379136)	20.273	1.30415	2.46937	9.21485e-15	1.69031e-12	4.64834e-10
Medtr1g070135	chr1	complement(30807644..30809581)	58.7356	1.17129	2.25212	9.88098e-15	1.80593e-12	4.98436e-10
Medtr7g031847	chr7	complement(11093320..11095045)	5.36445	4.4207	21.4172	1.0103e-14	1.83985e-12	5.09637e-10
Medtr1g033360	chr1	complement(12003770..12005171)	32.0164	9.82184	905.041	1.09912e-14	1.99439e-12	5.5444e-10
Medtr4g114320	chr4	complement(46984729..46986569)	2.58612	4.41354	21.3113	1.66533e-14	3.01097e-12	8.40061e-10
Medtr4g130270	chr4	54266443..54269143	7.01	2.27171	4.82896	1.95399e-14	3.52026e-12	9.85672e-10
Medtr6g007690	chr6	1785079..1788545	3.70983	5.00643	32.1429	2.12053e-14	3.80668e-12	1.06968e-09
Medtr0002s1060	scaffold0002	complement(400364..401875)	162.245	1.34583	2.54176	3.30846e-14	5.91816e-12	1.66892e-09
Medtr3g058630	chr3	complement(23324436..23327093)	8.76837	1.69485	3.23743	3.35287e-14	5.97641e-12	1.69132e-09
Medtr2g081630	chr2	complement(34259869..34260235)	11.4212	5.81275	56.21	3.51941e-14	6.25116e-12	1.77533e-09
Medtr8g031170	chr8	11654482..11655060	33.8268	9.69422	828.42	3.75255e-14	6.64189e-12	1.89294e-09
Medtr7g012340	chr7	3618696..3619262	6.67217	5.37955	41.63	4.38538e-14	7.73483e-12	2.21216e-09
Medtr1g115195	chr1	51864615..51865729	25.4599	1.87411	3.66575	5.27356e-14	9.26897e-12	2.66019e-09
Medtr4g128180	chr4	53348816..53350493	4.41905	4.94281	30.7562	5.92859e-14	1.03841e-11	2.99062e-09
Medtr7g053290	chr7	complement(18744136..18751674)	40.4405	1.16704	2.24551	7.01661e-14	1.22473e-11	3.53946e-09
Medtr4g109150	chr4	45283948..45285675	4.70551	7.43168	172.647	7.18314e-14	1.24947e-11	3.62346e-09
Medtr2g438560	chr2	complement(15587523..15589330)	11.4455	2.04171	4.11732	7.88258e-14	1.36642e-11	3.97629e-09
Medtr5g081780	chr5	35051145..35052061	20.7261	9.34406	649.893	1.02585e-13	1.77218e-11	5.17478e-09
Medtr7g011663	chr7	complement(3175131..3186380)	29.7512	1.62275	3.07963	1.05471e-13	1.81583e-11	5.32039e-09
Medtr3g058250	chr3	complement(23038848..23040564)	3.57944	2.23532	4.70869	1.09246e-13	1.87442e-11	5.5108e-09
Medtr6g086575	chr6	complement(32589301..32592601)	3.36502	5.79073	55.3584	1.12355e-13	1.92123e-11	5.66761e-09
Medtr1g080780	chr1	complement(35928444..35929462)	7.12178	5.73989	53.4415	1.22458e-13	2.08691e-11	6.17725e-09
Medtr8g024310	chr8	complement(8913902..8918194)	86.843	1.21079	2.31464	1.82188e-13	3.09437e-11	9.19027e-09
Medtr1g069620	chr1	complement(30273938..30277729)	5.55578	9.23866	604.106	1.96509e-13	3.32642e-11	9.91272e-09
Medtr3g085740	chr3	38793220..38797762	81.043	1.19996	2.29733	2.06946e-13	3.49136e-11	1.04392e-08
Medtr3g008010	chr3	complement(1280979..1283041)	8.46807	9.1783	579.354	2.27596e-13	3.82695e-11	1.14808e-08
Medtr4g057730	chr4	21241898..21245081	1.88558	2.74852	6.72029	2.37255e-13	3.9761e-11	1.19681e-08
Medtr2g063813	chr2	complement(26956988..26965805)	1.6233	7.28909	156.4	2.53464e-13	4.23369e-11	1.27857e-08
Medtr8g089190	chr8	complement(37053824..37055698)	12.8313	2.38902	5.23802	2.78555e-13	4.63743e-11	1.40514e-08
Medtr8g074920	chr8	31673934..31676543	21.3214	1.18018	2.26605	3.68705e-13	6.11808e-11	1.8599e-08
Medtr7g080180	chr7	complement(30482239..30489482)	13.1665	1.86401	3.64018	5.24358e-13	8.67237e-11	2.64507e-08
Medtr4g133720	chr4	55939092..55939798	4.74241	5.20669	36.9291	6.4404e-13	1.0617e-10	3.2488e-08
Medtr4g096690	chr4	38471181..38475507	47.2105	1.17762	2.26203	6.80456e-13	1.11808e-10	3.43249e-08
Medtr4g057865	chr4	21371108..21373227	8.84412	3.09999	8.57413	9.46021e-13	1.54939e-10	4.77211e-08
Medtr5g083520	chr5	36047530..36052948	24.7251	1.29122	2.44734	1.21414e-12	1.98207e-10	6.12461e-08
Medtr3g089125	chr3	complement(40831984..40834426)	4.4661	3.4203	10.7056	1.30551e-12	2.12436e-10	6.58552e-08
Medtr4g057890	chr4	complement(21384217..21386449)	4.64218	2.34475	5.07973	1.31628e-12	2.135e-10	6.63984e-08
Medtr7g086820	chr7	complement(33763582..33764919)	12.1329	8.9308	488.023	1.43252e-12	2.31609e-10	7.22621e-08
Medtr5g064990	chr5	27319869..27321352	4.94513	1.85233	3.61082	1.53033e-12	2.46633e-10	7.7196e-08
Medtr1g102070	chr1	46102116..46104813	5.76793	1.70218	3.25392	1.69564e-12	2.72405e-10	8.5535e-08
Medtr7g079440	chr7	complement(30155362..30162536)	31.0344	1.17579	2.25916	1.78335e-12	2.85585e-10	8.99594e-08
Medtr7g090520	chr7	complement(35626006..35627708)	34.818	1.7932	3.46582	1.87295e-12	2.98984e-10	9.44789e-08
Medtr2g104130	chr2	44868826..44871074	34.5823	1.26843	2.40899	2.40874e-12	3.83301e-10	1.21506e-07
Medtr1g110290	chr1	complement(49735117..49737508)	5.43463	2.05916	4.16745	2.58915e-12	4.09971e-10	1.30607e-07
Medtr7g055743	chr7	complement(19128430..19132762)	3.22961	6.10637	68.897	2.59259e-12	4.09971e-10	1.30781e-07
Medtr8g012885	chr8	3900586..3901381	35.3574	8.93542	489.587	3.51164e-12	5.53565e-10	1.77141e-07
Medtr4g117750	chr4	48862818..48864913	2.73983	2.32605	5.01429	3.68883e-12	5.79686e-10	1.86079e-07
Medtr2g025170	chr2	8954695..8955548	12.3848	1.96136	3.89429	4.31455e-12	6.73818e-10	2.17643e-07
Medtr7g087400	chr7	33992300..33996425	4.46942	1.95462	3.87615	5.46097e-12	8.50225e-10	2.75473e-07
Medtr8g012850	chr8	3868606..3869836	29.2867	8.67882	409.812	5.49172e-12	8.52382e-10	2.77024e-07
Medtr7g071760	chr7	26613612..26614361	6.55463	6.94343	123.078	6.28786e-12	9.72959e-10	3.17185e-07
Medtr4g009960	chr4	complement(2144712..2156354)	5.46938	1.2201	2.32964	7.65299e-12	1.18057e-09	3.86047e-07
Medtr6g477760	chr6	28528572..28534464	2.18589	6.83179	113.913	7.6803e-12	1.18117e-09	3.87425e-07
Medtr0045s0060	scaffold0045	22594..28397	39.2413	1.95084	3.86598	7.84472e-12	1.20279e-09	3.95719e-07
Medtr4g058730	chr4	21611170..21613905	3.71944	1.81361	3.5152	8.25762e-12	1.26226e-09	4.16547e-07
Medtr1g116890	chr1	52795806..52798189	9.77218	1.41198	2.66103	8.48088e-12	1.29248e-09	4.2781e-07
Medtr3g058000	chr3	complement(22946208..22947981)	10.3495	1.66314	3.16705	8.63798e-12	1.31245e-09	4.35734e-07
Medtr2g093810	chr2	complement(40012105..40013370)	3.34445	3.55521	11.755	1.00466e-11	1.5219e-09	5.06792e-07
Medtr3g057970	chr3	complement(22931720..22934239)	4.92452	1.52322	2.87432	1.15322e-11	1.73651e-09	5.81731e-07
Medtr2g029300	chr2	10930336..10936870	4.12983	8.51988	367.062	1.35489e-11	2.02808e-09	6.83463e-07
Medtr3g078410	chr3	35327706..35337657	9.60287	1.17618	2.25978	1.68849e-11	2.51995e-09	8.51744e-07
Medtr4g005230	chr4	complement(124806..131589)	5.84209	8.50305	362.804	1.92975e-11	2.87151e-09	9.73441e-07
Medtr3g106430	chr3	complement(49190319..49192902)	65.7729	1.14431	2.21041	2.23184e-11	3.31126e-09	1.12583e-06
Medtr4g100480	chr4	41422220..41425247	4.21479	2.34139	5.06791	2.43304e-11	3.59919e-09	1.22732e-06
Medtr7g088350	chr7	complement(34398447..34403528)	13.9635	1.12313	2.17819	2.54887e-11	3.75951e-09	1.28575e-06
Medtr7g071790	chr7	26628624..26629267	4.66742	5.04274	32.9621	2.58853e-11	3.80131e-09	1.30576e-06
Medtr8g076940	chr8	32650395..32654772	24.0953	1.09881	2.14178	2.59228e-11	3.80131e-09	1.30765e-06
Medtr1g021638	chr1	6521275..6522643	6.78084	1.86027	3.63077	2.69272e-11	3.93715e-09	1.35832e-06
Medtr8g032610	chr8	complement(12507341..12508908)	5.60034	1.81585	3.52068	2.72246e-11	3.96912e-09	1.37332e-06
Medtr1g096240	chr1	43327224..43331625	47.2911	1.03857	2.05419	2.83489e-11	4.12113e-09	1.43003e-06
Medtr2g014920	chr2	4342669..4347110	5.05457	1.77394	3.41986	2.88045e-11	4.17533e-09	1.45301e-06
Medtr7g009410	chr7	2050515..2052629	6.80562	8.41078	340.328	3.18167e-11	4.59874e-09	1.60496e-06
Medtr4g116610	chr4	complement(48308548..48308883)	18.1947	1.95999	3.8906	3.46113e-11	4.98838e-09	1.74593e-06
Medtr8g067980	chr8	28315848..28316630	10.6843	8.48504	358.305	3.50285e-11	5.03413e-09	1.76698e-06
Medtr5g086080	chr5	37215665..37218881	2.06764	3.40753	10.6113	3.97712e-11	5.69948e-09	2.00622e-06
Medtr5g012270	chr5	complement(3644799..3647379)	3.1123	2.1929	4.57225	4.31304e-11	6.16337e-09	2.17567e-06
Medtr7g103450	chr7	41858984..41861868	40.9515	1.05138	2.07251	4.5527e-11	6.48747e-09	2.29657e-06
Medtr3g020800	chr3	6034245..6035685	12.8774	6.56389	94.6079	4.68129e-11	6.65191e-09	2.36143e-06
Medtr4g121880	chr4	complement(50292139..50299737)	39.0386	1.0482	2.06795	4.83591e-11	6.85232e-09	2.43943e-06
Medtr7g115050	chr7	47501145..47503452	4.9972	8.3913	335.764	4.88612e-11	6.90408e-09	2.46476e-06
Medtr3g087980	chr3	39878065..39887996	19.4738	1.15724	2.2303	5.06104e-11	7.13126e-09	2.55299e-06
Medtr6g036780	chr6	12897180..12900412	0.875457	4.61497	24.5044	5.2198e-11	7.33448e-09	2.63308e-06
Medtr3g434790	chr3	complement(11317144..11318156)	5.08453	2.39249	5.25064	5.90409e-11	8.27294e-09	2.97826e-06
Medtr4g133890	chr4	56004969..56009577	9.13275	1.4184	2.6729	6.00859e-11	8.39605e-09	3.03097e-06
Medtr4g131180	chr4	complement(54724088..54728861)	42.7439	1.0507	2.07153	6.50122e-11	9.05933e-09	3.27948e-06
Medtr7g106880	chr7	complement(43529266..43537557)	1.58294	3.04966	8.28016	6.61924e-11	9.19837e-09	3.33901e-06
Medtr7g105560	chr7	42809591..42812532	7.75125	2.67042	6.36614	7.22172e-11	1.0008e-08	3.64293e-06
Medtr3g462710	chr3	complement(25072267..25075832)	11.5813	1.07789	2.11094	7.30285e-11	1.00927e-08	3.68385e-06
Medtr8g012890	chr8	3903544..3903985	17.3207	6.66886	101.749	7.81142e-11	1.07661e-08	3.94039e-06
Medtr4g104060	chr4	43051480..43053398	1.97976	2.70207	6.50734	7.97178e-11	1.09572e-08	4.02128e-06
Medtr3g111780	chr3	complement(52289425..52290522)	6.54751	8.26453	307.518	8.23369e-11	1.12864e-08	4.1534e-06
Medtr7g061780	chr7	complement(22354034..22356603)	6.66546	8.15584	285.203	1.08739e-10	1.47452e-08	5.48522e-06
Medtr7g081050	chr7	30902997..30905931	5.06038	8.14351	282.775	1.12476e-10	1.52111e-08	5.67374e-06
Medtr3g079560	chr3	complement(35909107..35911950)	4.60802	8.1827	290.562	1.17937e-10	1.59069e-08	5.9492e-06
Medtr5g094380	chr5	complement(41238888..41241214)	3.92208	8.16611	287.239	1.20061e-10	1.61503e-08	6.05634e-06
Medtr3g073820	chr3	complement(33321515..33332916)	0.785139	6.43131	86.3011	1.28792e-10	1.72787e-08	6.49678e-06
Medtr0021s0160	scaffold0021	60782..62658	2.21474	3.07881	8.44919	1.43221e-10	1.91635e-08	7.22466e-06
Medtr3g117690	chr3	55101541..55103878	2.56587	6.41116	85.1041	1.46026e-10	1.94872e-08	7.36615e-06
Medtr1g116000	chr1	complement(52419232..52420234)	3.69715	2.88138	7.36856	1.50851e-10	2.0078e-08	7.60954e-06
Medtr2g031420	chr2	complement(11802695..11804357)	1.58265	5.14958	35.4959	1.7114e-10	2.26587e-08	8.63296e-06
Medtr3g007770	chr3	complement(1173614..1180993)	4.83211	1.2061	2.30714	1.74015e-10	2.29791e-08	8.778e-06
Medtr8g068300	chr8	28474611..28479112	4.24157	1.83451	3.56649	1.8067e-10	2.37956e-08	9.11371e-06
Medtr1g099360	chr1	complement(44850186..44854800)	51.9971	1.0297	2.0416	2.28451e-10	3.00103e-08	1.1524e-05
Medtr7g093030	chr7	complement(36940271..36942876)	4.26111	1.79255	3.46427	2.32392e-10	3.04487e-08	1.17228e-05
Medtr3g078250	chr3	complement(35245629..35248236)	1.06921	4.72587	26.4623	2.37009e-10	3.09732e-08	1.19557e-05
Medtr1g026090	chr1	8424552..8425507	11.3234	8.07064	268.847	2.42998e-10	3.16738e-08	1.22578e-05
Medtr1g105965	chr1	47884162..47888251	21.0646	1.05073	2.07157	2.64797e-10	3.44263e-08	1.33574e-05
Medtr6g463310	chr6	21899897..21903998	1.90367	4.08476	16.9682	2.88899e-10	3.73673e-08	1.45732e-05
Medtr7g098230	chr7	complement(39259538..39262276)	2.64062	1.96019	3.89113	3.24267e-10	4.18346e-08	1.63573e-05
Medtr4g091020	chr4	36009467..36010103	12.1408	7.98187	252.802	3.46241e-10	4.45556e-08	1.74658e-05
Medtr6g086560	chr6	complement(32148021..32152457)	8.88112	1.26731	2.40712	3.62197e-10	4.64902e-08	1.82707e-05
Medtr3g063410	chr3	28712651..28714073	7.29932	8.00233	256.413	3.70593e-10	4.74472e-08	1.86942e-05
Medtr7g111740	chr7	45890775..45893800	1.74596	3.00795	8.04422	3.9491e-10	5.04324e-08	1.99208e-05
Medtr3g107393	chr3	49544686..49546089	54.6432	1.07909	2.1127	4.85212e-10	6.14976e-08	2.4476e-05
Medtr3g072710	chr3	complement(32725078..32727063)	2.96481	1.74367	3.34885	5.17059e-10	6.52063e-08	2.60825e-05
Medtr3g088565	chr3	40295219..40297253	22.5595	1.03956	2.0556	6.77411e-10	8.52152e-08	3.41713e-05
Medtr6g043090	chr6	complement(14875572..14880864)	0.974897	6.39516	84.1657	6.97512e-10	8.75256e-08	3.51853e-05
Medtr1g096030	chr1	43289642..43291027	1.74918	2.87583	7.34024	7.1125e-10	8.9028e-08	3.58783e-05
Medtr6g082180	chr6	30681976..30683550	4.95994	1.74652	3.35548	7.92257e-10	9.89223e-08	3.99646e-05
Medtr4g090600	chr4	complement(35921845..35924998)	2.93062	2.0286	4.0801	8.85875e-10	1.10338e-07	4.46871e-05
Medtr4g018760	chr4	complement(5777438..5780265)	5.28761	1.88607	3.69626	9.17382e-10	1.13981e-07	4.62764e-05
Medtr4g064025	chr4	23886573..23887358	4.12098	3.09006	8.51532	9.77482e-10	1.2115e-07	4.93081e-05
Medtr5g069360	chr5	29403540..29411488	0.66751	3.95429	15.5011	1.0036e-09	1.24082e-07	5.06255e-05
Medtr7g101190	chr7	complement(40834269..40836017)	7.89882	1.51978	2.86748	1.02346e-09	1.26228e-07	5.16274e-05
Medtr2g075830	chr2	31726251..31727821	3.90866	7.67774	204.753	1.22125e-09	1.50255e-07	6.16046e-05
Medtr3g117560	chr3	55049134..55049463	5.92429	3.95972	15.5594	1.48642e-09	1.81992e-07	7.49807e-05
Medtr2g034950	chr2	13425610..13428014	1.10427	3.94466	15.3979	1.71159e-09	2.09054e-07	8.63395e-05
Medtr0062s0110	scaffold0062	47428..48694	12.7646	1.77426	3.42062	1.81187e-09	2.20768e-07	9.13981e-05
Medtr8g010530	chr8	complement(2753812..2756960)	5.13656	1.81604	3.52114	1.86526e-09	2.26181e-07	9.40913e-05
Medtr5g023170	chr5	complement(9213175..9215134)	18.7934	1.44767	2.72767	2.15384e-09	2.59303e-07	0.000108648
Medtr2g099110	chr2	complement(42484922..42486505)	5.90425	1.38984	2.6205	2.45724e-09	2.93033e-07	0.000123953
Medtr4g116620	chr4	complement(48306184..48306438)	17.561	7.56847	189.818	2.55149e-09	3.03555e-07	0.000128707
Medtr5g072570	chr5	complement(30903173..30907133)	12.6439	1.14321	2.20872	2.87928e-09	3.40944e-07	0.000145242
Medtr4g050140	chr4	complement(17725072..17726835)	13.1944	1.21552	2.32224	3.32485e-09	3.92784e-07	0.000167719
Medtr4g075570	chr4	28881013..28882292	2.62708	5.99957	63.9808	3.57597e-09	4.21463e-07	0.000180386
Medtr2g034260	chr2	complement(13086374..13088374)	11.7994	1.08651	2.1236	3.70238e-09	4.35345e-07	0.000186763
Medtr7g112615	chr7	46322470..46324662	4.37713	1.45457	2.74076	4.79896e-09	5.60367e-07	0.000242079
Medtr7g028815	chr7	complement(9937370..9938062)	7.45325	6.02933	65.3144	4.91844e-09	5.71672e-07	0.000248106
Medtr8g012875	chr8	3891659..3893329	8.91831	7.56983	189.997	5.37514e-09	6.21889e-07	0.000271144
Medtr2g438260	chr2	15427023..15427886	15.6554	1.07487	2.10654	7.18019e-09	8.25051e-07	0.000362197
Medtr7g102490	chr7	41535868..41537833	3.03701	2.31619	4.98014	7.21969e-09	8.27705e-07	0.00036419
Medtr7g098150	chr7	complement(39215366..39218359)	1.23571	4.31337	19.8817	7.59311e-09	8.68541e-07	0.000383027
Medtr8g093070	chr8	38898984..38900682	2.3491	2.35941	5.13161	8.93959e-09	1.01794e-06	0.000450948
Medtr1g059960	chr1	complement(26103090..26105962)	14.5597	1.05054	2.07131	9.25136e-09	1.04871e-06	0.000466675
Medtr7g094760	chr7	complement(37805727..37806496)	4.0646	3.10243	8.58866	9.36389e-09	1.05909e-06	0.000472352
Medtr8g099365	chr8	41863730..41864362	118.545	1.07443	2.10589	1.03507e-08	1.16808e-06	0.000522132
Medtr5g026730	chr5	11035604..11036209	6.2737	2.01751	4.04884	1.22866e-08	1.38345e-06	0.000619785
Medtr8g018570	chr8	complement(6361499..6365556)	3.85401	1.51699	2.86193	1.25342e-08	1.40819e-06	0.000632276
Medtr6g009260	chr6	complement(2701629..2707070)	1.34287	4.72784	26.4985	1.31798e-08	1.47415e-06	0.000664842
Medtr3g058110	chr3	complement(22985915..22987741)	12.6668	1.21408	2.31992	1.40365e-08	1.5665e-06	0.000708058
Medtr1g021740	chr1	complement(6584225..6589072)	2.12388	1.93683	3.82864	1.43691e-08	1.59304e-06	0.000724833
Medtr4g131800	chr4	54984503..54994825	8.11801	1.23744	2.3578	1.43668e-08	1.59304e-06	0.000724719
Medtr4g023060	chr4	complement(7758397..7763392)	0.973673	2.11074	4.31913	1.59658e-08	1.75847e-06	0.000805379
Medtr4g093050	chr4	36933094..36935061	0.99922	3.34097	10.1329	1.66373e-08	1.82843e-06	0.00083925
Medtr3g467750	chr3	29969521..29970301	35.7407	1.02558	2.03577	1.70166e-08	1.86606e-06	0.000858385
Medtr7g056803	chr7	20459888..20460924	8.40674	1.1961	2.29119	2.15197e-08	2.3345e-06	0.00108554
Medtr2g028980	chr2	complement(10792786..10794705)	15.4412	1.1097	2.15801	2.22846e-08	2.41229e-06	0.00112413
Medtr2g026510	chr2	9587448..9588191	5.94756	1.60472	3.04137	2.35486e-08	2.54365e-06	0.00118788
Medtr8g078300	chr8	complement(33373934..33375706)	1.01863	4.051	16.5757	2.45548e-08	2.64667e-06	0.00123864
Medtr8g074570	chr8	complement(31530312..31533187)	49.0943	13.0256	8338.86	2.46764e-08	2.65411e-06	0.00124478
Medtr1g070250	chr1	complement(30955961..30957093)	14.152	1.09049	2.12946	2.66547e-08	2.85471e-06	0.00134457
Medtr3g073780	chr3	33297030..33301686	3.98875	1.29127	2.44743	2.92813e-08	3.10962e-06	0.00147707
Medtr4g091000	chr4	35999234..36002594	7.37375	7.22168	149.259	2.95683e-08	3.1335e-06	0.00149154
Medtr1g090783	chr1	40802894..40803364	3.55752	3.76832	13.6263	3.92525e-08	4.11654e-06	0.00198005
Medtr8g461690	chr8	complement(21797953..21798774)	59.4761	12.8599	7433.8	3.98693e-08	4.17254e-06	0.00201117
Medtr6g051840	chr6	complement(18049156..18050464)	7.65879	7.04964	132.481	4.06948e-08	4.2326e-06	0.00205281
Medtr2g037790	chr2	complement(16365274..16372671)	4.87828	1.35715	2.56179	4.66699e-08	4.83412e-06	0.00235422
Medtr1g062970	chr1	27656037..27661236	1.43128	5.61441	48.9897	4.98799e-08	5.15603e-06	0.00251614
Medtr4g099310	chr4	complement(41203064..41204814)	3.35034	2.9218	7.57792	5.08371e-08	5.24422e-06	0.00256443
Medtr3g085630	chr3	38717092..38721880	2.30762	1.61358	3.06009	5.10938e-08	5.25995e-06	0.00257737
Medtr4g075450	chr4	complement(28789382..28789840)	6.89473	7.06619	134.01	6.38743e-08	6.50924e-06	0.00322207
Medtr1g105130	chr1	24984621..24985495	57.4457	12.5749	6101.46	7.04624e-08	7.13736e-06	0.00355441
Medtr8g067990	chr8	28320155..28320988	3.55929	6.97625	125.91	7.32389e-08	7.40374e-06	0.00369446
Medtr8g038580	chr8	14304801..14308078	1.07627	3.32723	10.0368	7.88133e-08	7.95132e-06	0.00397566
Medtr7g024950	chr7	complement(8261732..8263256)	10.9937	1.01016	2.01414	7.908e-08	7.9623e-06	0.00398911
Medtr7g063320	chr7	23056227..23060595	2.72106	2.00641	4.01781	9.45861e-08	9.46687e-06	0.0047713
Medtr4g093040	chr4	36929484..36932017	1.49016	1.6169	3.06715	1.0295e-07	1.02836e-05	0.00519322
Medtr8g031940	chr8	complement(11971921..11975439)	8.74772	1.00648	2.00901	1.10078e-07	1.09739e-05	0.00555278
Medtr4g057595	chr4	21143126..21147112	4.96675	1.05047	2.0712	1.18923e-07	1.18323e-05	0.00599897
Medtr7g099570	chr7	39943277..39945382	1.38939	6.75354	107.899	1.25424e-07	1.23814e-05	0.00632689
Medtr6g015695	chr6	5366226..5372458	0.545967	5.43771	43.3424	1.26709e-07	1.24838e-05	0.0063917
Medtr3g467130	chr3	27669661..27672771	2.79511	1.44012	2.71343	1.39748e-07	1.36882e-05	0.00704943
Medtr5g031270	chr5	complement(13395866..13400641)	0.859564	6.84799	115.199	1.45045e-07	1.41796e-05	0.00731666
Medtr1g027250	chr1	complement(8999283..9000272)	1.58592	5.27033	38.5946	1.48494e-07	1.44403e-05	0.00749062
Medtr8g035880	chr8	complement(13117744..13119789)	20.0554	12.1328	4490.97	1.83219e-07	1.76044e-05	0.0092423
Medtr7g077090	chr7	complement(29110794..29111363)	4.2718	6.69973	103.949	2.23439e-07	2.13066e-05	0.0112712
Medtr7g070860	chr7	26223156..26224633	1.67486	6.67151	101.935	2.59061e-07	2.4472e-05	0.0130681
Medtr3g026280	chr3	8088913..8094109	17.4631	11.9437	3939.23	3.31579e-07	3.11474e-05	0.0167262
Medtr2g088370	chr2	complement(37244408..37245154)	13.6141	1.09741	2.13971	3.89243e-07	3.62939e-05	0.019635
Medtr3g014820	chr3	4286399..4287257	27.3334	11.8035	3574.39	3.96561e-07	3.6908e-05	0.0200041
Medtr2g086640	chr2	36427352..36428046	35.1289	11.8585	3713.26	4.0206e-07	3.73509e-05	0.0202815
Medtr8g106670	chr8	45024349..45027049	0.984386	3.51468	11.4294	4.13521e-07	3.82746e-05	0.0208597
Medtr0100s0150	scaffold0100	33656..34541	25.1075	11.7289	3394.3	4.63508e-07	4.25113e-05	0.0233812
Medtr5g022560	chr5	8898326..8899733	17.0977	11.7385	3416.89	4.74001e-07	4.33948e-05	0.0239105
Medtr4g037670	chr4	15021715..15030707	5.99208	1.06647	2.0943	4.99173e-07	4.5534e-05	0.0251803
Medtr6g007687	chr6	complement(1782027..1784332)	1.69944	6.51882	91.6982	5.35408e-07	4.84885e-05	0.0270081
Medtr2g011580	chr2	2826208..2828224	1.72156	3.09227	8.52839	6.18894e-07	5.58488e-05	0.0312195
Medtr6g073040	chr6	27108365..27109793	26.3531	11.6348	3179.89	6.36645e-07	5.73481e-05	0.0321149
Medtr7g116850	chr7	complement(48221861..48223396)	10.919	1.12096	2.17492	6.6673e-07	5.99511e-05	0.0336326
Medtr4g036300	chr4	11851296..11851862	3.73145	6.50205	90.6382	7.7135e-07	6.88672e-05	0.03891
Medtr5g006740	chr5	1051781..1053835	1.09053	3.47987	11.1569	8.13673e-07	7.25175e-05	0.0410449
Medtr2g438630	chr2	complement(15617679..15617983)	16.4565	1.39277	2.62583	8.33769e-07	7.41775e-05	0.0420586
Medtr1g055255	chr1	complement(24417898..24422244)	1.29317	1.82905	3.55303	8.35883e-07	7.42347e-05	0.0421653
Medtr8g086640	chr8	35961338..35962088	8.34369	1.52409	2.87606	8.6083e-07	7.6182e-05	0.0434237
Medtr0084s0030	scaffold0084	16850..17730	20.9741	11.458	2813.22	8.73327e-07	7.71525e-05	0.0440541
Medtr2g062310	chr2	complement(26303022..26306172)	1.30006	3.25434	9.54233	8.88379e-07	7.80757e-05	0.0448134
Medtr3g080220	chr3	36283957..36289285	1.87295	1.09919	2.14234	8.8945e-07	7.80757e-05	0.0448674
Medtr5g094840	chr5	41463196..41466146	12.0945	11.472	2840.73	8.89967e-07	7.80757e-05	0.0448935
Medtr1g014160	chr1	complement(3091946..3095952)	2.75337	6.40497	84.7399	9.26107e-07	8.11051e-05	0.0467166
Medtr4g082345	chr4	32072436..32073389	2.00242	6.33969	80.9911	1.06164e-06	9.23331e-05	0.0535532
Medtr1g061540	chr1	26861749..26863761	3.66352	1.69553	3.23897	1.30504e-06	0.000111578	0.0658312
Medtr1g021820	chr1	complement(6590938..6594604)	7.31299	1.0488	2.06881	1.40297e-06	0.000119642	0.0707716
Medtr3g007690	chr3	complement(1120010..1122156)	2.79602	2.35071	5.10075	1.63354e-06	0.000138259	0.0824022
Medtr6g011860	chr6	3555895..3560091	0.704102	2.98777	7.93246	1.72593e-06	0.000145834	0.0870629
Medtr5g017290	chr5	complement(6298442..6300645)	2.47748	1.37644	2.59627	2.07038e-06	0.000174063	0.104438
Medtr2g023440	chr2	complement(8282422..8282667)	5.36064	5.02868	32.6424	2.09047e-06	0.000175169	0.105452
Medtr3g111350	chr3	52030514..52035160	0.758012	6.13825	70.4367	2.22836e-06	0.000185491	0.112407
Medtr0188s0020	scaffold0188	8174..11837	1.54805	1.94493	3.8502	2.43792e-06	0.000202267	0.122978
Medtr2g014250	chr2	3995651..3996265	3.97844	2.19621	4.58274	2.52969e-06	0.000209193	0.127608
Medtr7g062020	chr7	22501853..22508938	5.74049	10.9936	2038.96	2.54245e-06	0.000209904	0.128251
Medtr7g087610	chr7	complement(34112392..34113882)	2.54921	4.30906	19.8223	2.57675e-06	0.000212388	0.129982
Medtr1g021632	chr1	complement(6510010..6513234)	0.787777	6.06477	66.9389	2.59821e-06	0.000213808	0.131064
Medtr3g014360	chr3	complement(4077089..4081120)	0.27239	4.19197	18.2772	2.67224e-06	0.000218829	0.134799
Medtr4g058570	chr4	complement(21540064..21542051)	5.94262	1.11238	2.16202	2.73576e-06	0.000223306	0.138003
Medtr2g102030	chr2	43906744..43909269	1.90173	1.82762	3.54952	2.76738e-06	0.000225522	0.139598
Medtr8g104970	chr8	complement(44247952..44253430)	1.14314	6.11401	69.2628	2.77412e-06	0.000225706	0.139938
Medtr7g076665	chr7	28887778..28889487	14.069	10.8932	1901.84	3.0896e-06	0.000249712	0.155852
Medtr8g012820	chr8	3829510..3830484	50.5678	10.8868	1893.39	3.09393e-06	0.000249712	0.15607
Medtr4g079800	chr4	30891837..30893129	10.3074	10.8684	1869.5	3.23638e-06	0.000259483	0.163256
Medtr5g009210	chr5	complement(2149778..2151891)	1.14851	4.96448	31.2218	3.35841e-06	0.00026679	0.169412
Medtr4g024960	chr4	complement(8481916..8491949)	1.05272	3.69378	12.9401	3.55969e-06	0.000282335	0.179565
Medtr7g028810	chr7	9932906..9933694	5.6287	3.18813	9.11428	3.98808e-06	0.000312869	0.201175
Medtr5g033070	chr5	complement(14249153..14249676)	2.98651	6.06506	66.9523	4.0413e-06	0.000316552	0.20386
Medtr0147s0050	scaffold0147	complement(13063..13680)	2.34884	5.94903	61.7782	4.27221e-06	0.000332573	0.215507
Medtr3g461000	chr3	24065055..24068423	4.60864	10.7375	1707.25	4.29445e-06	0.00033379	0.216629
Medtr7g091570	chr7	complement(36225788..36226925)	1.67046	2.32103	4.99689	4.50531e-06	0.000349357	0.227266
Medtr3g028650	chr3	9170419..9172230	0.866368	5.98468	63.3242	4.54338e-06	0.000351513	0.229186
Medtr2g090050	chr2	38123748..38126473	0.883521	2.86419	7.28125	4.62594e-06	0.000356261	0.233351
Medtr1g027570	chr1	complement(9155270..9158538)	0.898849	2.11677	4.33721	4.76022e-06	0.000364741	0.240125
Medtr7g080530	chr7	30651313..30655363	0.786168	4.7645	27.1804	5.1563e-06	0.000393501	0.260104
Medtr8g040940	chr8	15354196..15357869	6.96484	10.6566	1614.23	5.31833e-06	0.000405254	0.268278
Medtr3g107650	chr3	complement(49646986..49647936)	10.6011	10.5832	1534.12	5.86468e-06	0.000445171	0.295838
Medtr7g063800	chr7	23306587..23309717	6.95301	1.34602	2.54209	5.95228e-06	0.000449242	0.300257
Medtr8g046240	chr8	18101780..18104684	2.03139	1.33213	2.51775	5.95795e-06	0.000449242	0.300543
Medtr4g103670	chr4	42863423..42865000	2.13206	1.92003	3.7843	6.43438e-06	0.000481567	0.324576
Medtr6g008430	chr6	complement(2261074..2264314)	6.19121	10.536	1484.79	6.49736e-06	0.00048556	0.327753
Medtr5g062370	chr5	complement(25904566..25913155)	0.467688	5.99229	63.659	7.46714e-06	0.000553117	0.376672
Medtr4g117660	chr4	complement(48814098..48819977)	1.86866	1.18001	2.26579	7.59242e-06	0.000561572	0.382992
Medtr2g023860	chr2	8458211..8460050	2.35986	1.51547	2.85893	7.77381e-06	0.000573307	0.392142
Medtr4g091010	chr4	36006163..36006750	19.2465	10.4021	1353.12	8.49216e-06	0.000622643	0.428378
Medtr2g036260	chr2	15711040..15712293	7.63531	1.27551	2.42085	9.28492e-06	0.000676833	0.468368
Medtr0161s0050	scaffold0161	23112..24983	4.02418	1.0123	2.01713	9.28013e-06	0.000676833	0.468127
Medtr3g058660	chr3	complement(23334931..23336016)	0.970471	3.27788	9.69927	9.64569e-06	0.000698621	0.486567
Medtr5g044000	chr5	complement(19340200..19349034)	5.351	10.3168	1275.47	9.79783e-06	0.00070606	0.494242
Medtr4g033015	chr4	complement(11444168..11445891)	1.29972	1.98533	3.95953	1.10206e-05	0.000787427	0.555924
Medtr4g080700	chr4	complement(31185065..31186744)	2.10897	1.74353	3.34853	1.10093e-05	0.000787427	0.555351
Medtr8g005010	chr8	complement(3778..4871)	1.09208	3.71935	13.1715	1.16557e-05	0.00082811	0.587958
Medtr4g127140	chr4	complement(52740241..52741052)	3.3425	1.77938	3.43278	1.2697e-05	0.000894537	0.640488
Medtr7g085200	chr7	32940108..32943998	1.06922	2.08954	4.25613	1.33059e-05	0.000929646	0.671204
Medtr1g103110	chr1	complement(46647824..46648731)	4.0656	1.49309	2.81491	1.6379e-05	0.00113026	0.82622
Medtr3g035830	chr3	complement(13284151..13286718)	0.838383	3.35552	10.2356	1.66962e-05	0.00114745	0.842223
Medtr2g091165	chr2	39295551..39297179	0.709199	5.62298	49.2816	1.69257e-05	0.00116006	0.853801
Medtr1g027260	chr1	complement(9006672..9007604)	1.24207	5.61957	49.1654	1.71459e-05	0.00117196	0.864905
Medtr6g038730	chr6	13890399..13893951	0.334766	5.62727	49.4284	1.7138e-05	0.00117196	0.864512
Medtr1g086970	chr1	complement(38926509..38927951)	0.618369	4.45532	21.9374	1.71973e-05	0.00117388	0.8675
Medtr7g029540	chr7	complement(10620910..10622056)	1.82298	4.9996	31.9911	1.98591e-05	0.00133392	1
Medtr2g038675	chr2	complement(16909067..16915332)	4.99493	9.98107	1010.65	2.02938e-05	0.0013595	1
Medtr1g073700	chr1	complement(32700293..32708616)	1.4604	1.0976	2.13999	2.13591e-05	0.0014233	1
Medtr5g004650	chr5	complement(55460..56229)	1.81009	2.23308	4.70138	2.33332e-05	0.00153859	1
Medtr8g012865	chr8	3882196..3883099	25.2743	9.86742	934.09	2.62855e-05	0.0017109	1
Medtr4g097640	chr4	complement(40308638..40310809)	6.01897	9.8475	921.286	2.68331e-05	0.00173981	1
Medtr8g045555	chr8	complement(17812773..17814331)	9.69163	1.80173	3.48639	2.69659e-05	0.00174617	1
Medtr6g051680	chr6	17995138..17996261	4.769	1.26083	2.39633	2.80171e-05	0.00180498	1
Medtr7g086280	chr7	complement(33452025..33452672)	11.1563	9.81488	900.685	3.14808e-05	0.00200254	1
Medtr3g114900	chr3	complement(53659262..53665181)	3.4892	9.74519	858.212	3.27807e-05	0.00207501	1
Medtr0302s0030	scaffold0302	complement(14777..15385)	8.98368	9.7012	832.44	3.27846e-05	0.00207501	1
Medtr2g040690	chr2	17844560..17847487	2.44987	1.20912	2.31197	3.28684e-05	0.00207771	1
Medtr0328s0040	scaffold0328	complement(12609..15405)	4.28591	9.69609	829.493	3.31114e-05	0.0020872	1
Medtr7g093330	chr7	37082348..37083768	4.43347	9.71231	838.874	3.36049e-05	0.00211104	1
Medtr8g012860	chr8	3876501..3877335	23.4224	9.72178	844.396	3.36799e-05	0.00211312	1
Medtr4g109470	chr4	45477291..45481844	0.531325	3.476	11.1271	3.37795e-05	0.00211674	1
Medtr0027s0260	scaffold0027	148270..149166	5.91229	9.65612	806.827	3.65182e-05	0.00226862	1
Medtr4g052040	chr4	18829097..18830158	3.79273	1.28745	2.44096	3.80132e-05	0.00235281	1
Medtr8g077890	chr8	complement(33161160..33163766)	0.561602	4.4324	21.5916	3.96992e-05	0.0024392	1
Medtr4g068290	chr4	complement(25604877..25606828)	5.01741	1.05263	2.0743	3.99361e-05	0.0024478	1
Medtr4g053635	chr4	19426355..19430829	2.57009	9.63607	795.697	4.08308e-05	0.00249657	1
Medtr2g460730	chr2	25049516..25052612	4.69383	9.60716	779.908	4.21011e-05	0.00255258	1
Medtr5g030310	chr5	complement(12740156..12741696)	15.9665	1.04109	2.05778	4.424e-05	0.00266624	1
Medtr8g463700	chr8	22469121..22469422	3.53675	5.52099	45.9182	4.78475e-05	0.00285298	1
Medtr6g008820	chr6	2445602..2451800	2.24426	1.33247	2.51834	4.92881e-05	0.00292849	1
Medtr0491s0040	scaffold0491	complement(10052..10911)	2.61416	5.37635	41.5378	4.96669e-05	0.00294406	1
Medtr4g067150	chr4	complement(25326110..25327263)	0.669572	3.06805	8.38641	5.00606e-05	0.00296011	1
Medtr5g084950	chr5	complement(36643552..36646799)	4.39019	1.07848	2.11182	5.2707e-05	0.00310239	1
Medtr5g068140	chr5	complement(28816383..28818056)	2.72933	9.44094	695.032	5.33363e-05	0.00313212	1
Medtr5g010350	chr5	complement(2753900..2755471)	0.94097	1.89113	3.70925	5.51444e-05	0.00321956	1
Medtr8g074580	chr8	31536167..31538303	3.49058	9.38301	667.678	6.20282e-05	0.00358004	1
Medtr3g067750	chr3	complement(30382606..30384596)	0.824537	3.9526	15.4829	6.38421e-05	0.0036596	1
Medtr3g008760	chr3	1650491..1651493	3.39173	1.44007	2.71334	6.42168e-05	0.00367274	1
Medtr2g042340	chr2	18471978..18473199	4.16309	2.26563	4.80864	6.45392e-05	0.003687	1
Medtr6g045097	chr6	complement(15984600..15985432)	1.94109	2.09508	4.2725	7.14787e-05	0.0040197	1
Medtr5g009780	chr5	2447611..2451302	2.29424	1.01613	2.02249	7.31718e-05	0.00410576	1
Medtr5g092815	chr5	40536474..40538433	2.02375	1.64184	3.12064	7.70969e-05	0.00429732	1
Medtr7g025000	chr7	8279703..8280423	0.923786	3.18256	9.07919	7.85455e-05	0.0043588	1
Medtr7g057900	chr7	20945872..20947041	3.40754	9.24415	606.412	8.46489e-05	0.0046718	1
Medtr4g097670	chr4	complement(40317945..40320935)	3.21261	9.2153	594.404	8.64567e-05	0.00476116	1
Medtr4g132350	chr4	complement(55307796..55310540)	1.71999	1.68567	3.21689	8.83888e-05	0.00484639	1
Medtr7g089730	chr7	complement(35144993..35146477)	3.9379	9.14457	565.967	9.45106e-05	0.00513738	1
Medtr5g093460	chr5	complement(40804416..40820316)	0.66351	2.45856	5.49669	9.47391e-05	0.00514426	1
Medtr3g054180	chr3	21488743..21489806	2.65607	2.01685	4.04699	9.5256e-05	0.00516677	1
Medtr1g009240	chr1	1245198..1246195	5.31139	9.15981	571.974	9.69759e-05	0.00523753	1
Medtr3g082180	chr3	37092713..37096025	0.573663	3.31913	9.98061	9.84261e-05	0.00531016	1
Medtr3g063240	chr3	complement(28615502..28618298)	3.48395	9.1448	566.056	9.92317e-05	0.00534791	1
Medtr5g077580	chr5	33112485..33117232	0.969441	1.98411	3.95617	0.000103403	0.00553719	1
Medtr0391s0020	scaffold0391	7230..13590	0.73996	1.73195	3.32177	0.000106128	0.00567112	1
Medtr7g076990	chr7	complement(29071310..29071876)	6.11026	9.0414	526.904	0.000114983	0.00611835	1
Medtr7g099710	chr7	40003339..40007996	0.28317	3.22972	9.38083	0.000116452	0.00618999	1
Medtr1g093150	chr1	complement(33787293..33789663)	0.692049	5.17749	36.1892	0.000121831	0.00644196	1
Medtr3g009180	chr3	1829947..1834344	0.55835	3.24037	9.45039	0.000126112	0.00661979	1
Medtr4g123537	chr4	complement(51358738..51361285)	1.85761	9.0285	522.215	0.000126092	0.00661979	1
Medtr6g072010	chr6	26686547..26691368	2.62663	1.08204	2.11703	0.000137096	0.00707849	1
Medtr5g014400	chr5	4830733..4831488	4.37583	8.97474	503.115	0.000137305	0.00708202	1
Medtr3g104660	chr3	complement(48235363..48238927)	1.01526	1.61056	3.0537	0.000145522	0.00746766	1
Medtr4g111975	chr4	46325032..46326931	0.93529	1.86137	3.63353	0.000146454	0.00750022	1
Medtr3g049390	chr3	complement(18389424..18389858)	7.41131	8.93784	490.407	0.000148062	0.00756694	1
Medtr8g078910	chr8	33631826..33632321	3.45665	2.98175	7.89943	0.000148349	0.00756694	1
Medtr6g014040	chr6	4513529..4515256	2.12819	8.88231	471.892	0.000156359	0.00790319	1
Medtr2g084535	chr2	35695914..35701181	0.775507	1.86851	3.65154	0.000156743	0.00790675	1
Medtr0071s0030	scaffold0071	17492..31087	0.551114	5.89724	59.5998	0.000159075	0.00800038	1
Medtr6g018300	chr6	7006187..7007659	2.30253	4.90095	29.8766	0.000165204	0.00825921	1
Medtr2g102010	chr2	complement(43891839..43893701)	2.9556	8.84456	459.702	0.000179639	0.00885798	1
Medtr7g102870	chr7	complement(41321730..41325306)	1.9939	8.82344	453.022	0.000193302	0.00943942	1
Medtr4g035220	chr4	complement(12069732..12073031)	5.08425	8.76869	436.154	0.000202476	0.00985876	1
Medtr3g036335	chr3	13497306..13498493	2.38779	8.75348	431.578	0.000202811	0.00986558	1
Medtr7g088790	chr7	complement(34644617..34648929)	2.24823	1.01577	2.02198	0.000210105	0.0101713	1
Medtr7g026170	chr7	complement(8666356..8668656)	0.438996	5.12492	34.8944	0.000217142	0.0104319	1
Medtr4g104410	chr4	43205970..43207166	1.15413	2.27877	4.85265	0.000222369	0.0106729	1
Medtr4g049550	chr4	17431937..17432610	3.95923	8.66475	405.836	0.000236592	0.0112697	1
Medtr8g042870	chr8	complement(16586144..16591006)	0.9235	1.71176	3.2756	0.000236987	0.0112779	1
Medtr8g068040	chr8	28336940..28337728	3.2705	8.61678	392.562	0.000255075	0.0119693	1
Medtr7g024730	chr7	8154269..8157419	0.715565	3.3031	9.87032	0.000267889	0.0124893	1
Medtr3g462220	chr3	24832582..24834600	2.71547	1.3779	2.5989	0.000268498	0.0125061	1
Medtr2g438540	chr2	complement(15580053..15581227)	6.28439	1.62062	3.07507	0.000283129	0.0131098	1
Medtr3g018920	chr3	5234891..5237916	1.33302	3.27466	9.67766	0.000307599	0.0140714	1
Medtr2g063823	chr2	26977730..26980254	1.04654	1.51292	2.85387	0.000325991	0.0148013	1
Medtr1g021630	chr1	complement(6502386..6507333)	0.788863	1.68879	3.22387	0.000332521	0.0150572	1
Medtr7g025820	chr7	complement(8600983..8602925)	0.347663	3.94119	15.3608	0.000367229	0.0163211	1
Medtr2g045240	chr2	19868298..19870717	1.88941	3.97664	15.743	0.000372844	0.016527	1
Medtr7g112440	chr7	complement(46226580..46227282)	2.43334	2.0285	4.07979	0.000396572	0.0174257	1
Medtr5g005950	chr5	complement(688137..688709)	3.75195	8.35355	327.092	0.00040076	0.0175638	1
Medtr1g014150	chr1	complement(3098026..3099896)	3.89188	8.40602	339.206	0.000402101	0.017592	1
Medtr7g105400	chr7	complement(42745444..42749092)	1.38773	8.31214	317.837	0.000407182	0.0177527	1
Medtr7g076970	chr7	complement(29068848..29069431)	3.31999	8.20413	294.91	0.000480435	0.0203999	1
Medtr1g475240	chr1	33263693..33269751	0.616047	8.16475	286.968	0.000489522	0.020716	1
Medtr7g076770	chr7	28956495..28957064	3.27519	8.14919	283.89	0.00054032	0.0225069	1
Medtr5g026760	chr5	complement(11048236..11050391)	0.97128	8.13201	280.53	0.000568788	0.0234738	1
Medtr2g008650	chr2	complement(1566568..1569207)	0.319146	2.83521	7.13649	0.000569839	0.0234844	1
Medtr5g026450	chr5	complement(10872142..10874226)	2.82084	1.06593	2.09352	0.000626588	0.02549	1
Medtr1g048360	chr1	complement(18319614..18322587)	0.266632	3.69214	12.9254	0.000634485	0.0257697	1
Medtr6g007985	chr6	2166326..2169167	1.62966	8.65464	403.001	0.000652645	0.0263798	1
Medtr8g031120	chr8	11621963..11622749	2.37905	8.15317	284.675	0.000670919	0.0269887	1
Medtr1g009720	chr1	1458446..1464777	0.198271	3.29124	9.78955	0.000683197	0.0273084	1
Medtr6g071400	chr6	complement(26154097..26154741)	1.02313	2.65189	6.28488	0.000690793	0.0275465	1
Medtr8g009170	chr8	2053790..2056198	0.377361	2.82392	7.08083	0.000701351	0.0278794	1
Medtr7g085810	chr7	complement(33273705..33274484)	2.57964	1.47256	2.77513	0.000710592	0.0282023	1
Medtr3g079320	chr3	35671734..35673404	1.3454	1.71182	3.27575	0.000713008	0.0282537	1
Medtr6g036920	chr6	12975993..12977162	0.573544	2.12309	4.35625	0.000723678	0.0285643	1
Medtr8g038650	chr8	14331450..14333078	1.06345	2.47253	5.55015	0.000743214	0.0292439	1
Medtr4g073330	chr4	27744250..27748377	0.27897	4.53181	23.1319	0.000754451	0.0295937	1
Medtr1g109390	chr1	complement(49467596..49471955)	1.43074	1.21099	2.31496	0.000776481	0.0301995	1
Medtr5g090660	chr5	39471989..39474539	1.5736	1.20017	2.29767	0.000786036	0.0304692	1
Medtr1g019640	chr1	5948679..5949279	6.15253	1.23987	2.36177	0.000791234	0.0306316	1
Medtr5g090880	chr5	complement(39586179..39587728)	0.409324	2.43674	5.41418	0.000824382	0.0317444	1
Medtr7g077010	chr7	complement(29078043..29078612)	2.69802	7.86789	233.598	0.000824173	0.0317444	1
Medtr4g037015	chr4	complement(13604453..13607704)	0.795967	8.45189	350.164	0.000861845	0.0329605	1
Medtr5g023370	chr5	complement(9301040..9302030)	1.70474	1.3533	2.55495	0.000863763	0.0330088	1
Medtr8g020590	chr8	7259905..7260934	0.504327	4.46726	22.1197	0.000878989	0.0333884	1
Medtr5g005570	chr5	complement(505257..508123)	1.45814	7.78563	220.652	0.00090859	0.0343061	1
Medtr3g047190	chr3	complement(15689254..15689968)	2.11888	7.84816	230.426	0.000925148	0.034879	1
Medtr2g040500	chr2	17771507..17774251	1.46059	1.01395	2.01943	0.000937024	0.0352215	1
Medtr5g011210	chr5	complement(3183139..3184843)	0.820738	2.1021	4.29334	0.000977276	0.0364628	1
Medtr7g011630	chr7	3160093..3161484	1.04078	7.78418	220.431	0.000988433	0.0367703	1
Medtr2g101370	chr2	43584848..43585844	3.39847	1.52862	2.88509	0.000993741	0.0369405	1
Medtr4g020520	chr4	complement(6521677..6524218)	0.910089	7.75685	216.294	0.00100651	0.0373328	1
Medtr3g095440	chr3	43609253..43611752	3.83988	1.11955	2.1728	0.00100957	0.0374187	1
Medtr7g082810	chr7	complement(31755163..31759381)	0.79297	1.46617	2.76287	0.00103554	0.0382125	1
Medtr0648s0010	scaffold0648	complement(493..833)	2.67931	1.99388	3.98306	0.00112294	0.0408993	1
Medtr1g062630	chr1	complement(27409489..27410551)	0.688498	2.08448	4.24122	0.00124825	0.0443114	1
Medtr1g079440	chr1	35290234..35291555	0.710325	2.01488	4.04148	0.00125053	0.0443612	1
Medtr8g479260	chr8	33777150..33779789	0.292406	3.60169	12.1399	0.00125774	0.0445856	1
Medtr7g070880	chr7	26229235..26230503	0.343142	4.22632	18.7176	0.00126085	0.0446333	1
Medtr3g110082	chr3	50968972..50975711	0.800215	1.13993	2.2037	0.00135614	0.0476388	1
Medtr2g012320	chr2	complement(3035610..3037095)	2.12088	1.01016	2.01413	0.00139101	0.0486601	1
Medtr4g082590	chr4	32119330..32121070	0.945791	1.51593	2.85983	0.00140401	0.0490468	1
Medtr7g013170	chr7	3752774..3754765	0.3275	2.37897	5.20165	0.00143724	0.0499966	1
Medtr4g123583	chr4	51398465..51405748	0.180844	4.31766	19.9409	0.00145554	0.050567	1
Medtr0071s0010	scaffold0071	complement(653..1916)	1.06194	2.85586	7.23933	0.00146593	0.0508579	1
Medtr8g046940	chr8	complement(18706074..18706664)	0.727858	3.46026	11.0063	0.00151705	0.0523792	1
Medtr2g017450	chr2	5476127..5479958	0.160731	4.25224	19.0568	0.00157969	0.0539146	1
Medtr1g054035	chr1	23029056..23031957	0.826393	1.68705	3.21997	0.00159412	0.0542969	1
Medtr4g005260	chr4	complement(149984..150885)	1.62275	7.46269	176.398	0.00160221	0.0544621	1
Medtr2g010320	chr2	2325979..2327493	0.777258	7.48505	179.154	0.00164112	0.0554473	1
Medtr0415s0020	scaffold0415	4168..5217	1.33109	2.60252	6.07348	0.00170971	0.0569646	1
Medtr7g062350	chr7	22650131..22650877	0.587137	4.23667	18.8523	0.00178461	0.0589927	1
Medtr1g111300	chr1	50274195..50274709	0.993811	2.81514	7.03785	0.0019342	0.0632332	1
Medtr3g081690	chr3	36989575..36995192	0.363204	1.31133	2.48171	0.00194508	0.0634243	1
Medtr5g058320	chr5	complement(24102996..24104673)	0.765897	7.36134	164.431	0.00196372	0.0639908	1
Medtr3g090150	chr3	40971575..40975544	1.20971	1.1606	2.23551	0.00205165	0.0661053	1
Medtr1g088040	chr1	39459691..39461145	1.99097	1.0937	2.1342	0.00206482	0.0664101	1
Medtr4g058000	chr4	21488258..21495500	0.140367	2.63219	6.19965	0.0021064	0.0674725	1
Medtr2g093750	chr2	39991185..39994421	0.582978	7.30378	158	0.00211009	0.0675389	1
Medtr3g064490	chr3	complement(29053045..29057091)	0.719037	1.99074	3.9744	0.0021468	0.0685768	1
Medtr4g036290	chr4	complement(11849832..11850398)	1.81044	7.28729	156.204	0.00223361	0.0708451	1
Medtr6g071605	chr6	26557232..26559691	1.05806	7.25352	152.59	0.00227053	0.0717185	1
Medtr2g027870	chr2	complement(10229058..10233537)	0.385028	2.26022	4.79066	0.00229007	0.0721552	1
Medtr1g037580	chr1	13909295..13915912	0.329055	2.30497	4.94157	0.0023572	0.0737175	1
Medtr4g040360	chr4	complement(14468431..14471559)	0.419116	1.44377	2.72031	0.00236046	0.0737317	1
Medtr2g098060	chr2	complement(41899473..41901649)	1.05561	1.59285	3.01644	0.00238948	0.0744502	1
Medtr4g109380	chr4	45425316..45425794	1.24329	2.7081	6.53461	0.00240227	0.0745947	1
Medtr5g094570	chr5	41336436..41338326	0.925262	1.35456	2.55719	0.00240447	0.0745947	1
Medtr8g074750	chr8	31605622..31607883	0.685496	7.23729	150.883	0.00244283	0.0753561	1
Medtr8g086490	chr8	35881582..35884235	0.56764	7.37487	165.98	0.00245538	0.0756623	1
Medtr5g009200	chr5	complement(2145303..2146586)	0.784655	7.14721	141.75	0.00249911	0.0765424	1
Medtr4g102660	chr4	complement(42553246..42554433)	0.350317	2.50517	5.67715	0.00264159	0.0801277	1
Medtr3g436160	chr3	complement(12134909..12141145)	0.1928	2.81703	7.0471	0.00272673	0.082087	1
Medtr7g116130	chr7	complement(47873379..47875349)	0.456123	7.09465	136.679	0.00273812	0.0823622	1
Medtr3g010780	chr3	complement(2577246..2582559)	0.274248	2.60197	6.07115	0.002765	0.0831213	1
Medtr4g091150	chr4	36079503..36081131	0.558716	7.11339	138.467	0.00279579	0.083847	1
Medtr2g097540	chr2	41654460..41658806	0.462721	2.11916	4.34441	0.00280838	0.0841746	1
Medtr4g046757	chr4	16578070..16581142	0.19285	4.09262	17.0608	0.00297269	0.0880014	1
Medtr5g056935	chr5	complement(23427470..23428023)	1.07169	2.04681	4.1319	0.00316433	0.0922541	1
Medtr3g100420	chr3	complement(46175821..46185588)	0.204727	3.8951	14.878	0.00347905	0.10039	1
Medtr1g088765	chr1	39743073..39746516	0.610481	1.27795	2.42494	0.00354688	0.10167	1
Medtr4g093760	chr4	37035327..37036113	0.492086	3.81845	14.1081	0.00354987	0.10167	1
Medtr8g031160	chr8	11645103..11645474	2.10589	6.89059	118.652	0.00359063	0.102462	1
Medtr5g023340	chr5	complement(9292214..9293224)	0.981362	1.33583	2.5242	0.00390995	0.109271	1
Medtr4g012610	chr4	complement(3345003..3345727)	2.09258	2.2696	4.8219	0.00407301	0.112952	1
Medtr3g014650	chr3	4192438..4197059	0.498206	1.3261	2.50725	0.00415445	0.114706	1
Medtr1g041315	chr1	15380120..15381730	0.534261	6.91089	120.334	0.00418235	0.11535	1
Medtr8g467650	chr8	complement(24454850..24455746)	0.804323	6.77909	109.827	0.00420668	0.115831	1
Medtr3g081040	chr3	complement(36704334..36706446)	0.559586	1.6857	3.21697	0.00424382	0.116345	1
Medtr7g076960	chr7	29066428..29067196	0.956765	6.80664	111.945	0.00424673	0.116362	1
Medtr2g084110	chr2	complement(35322014..35323288)	0.499644	2.03367	4.09444	0.00425232	0.116389	1
Medtr8g069350	chr8	complement(29023460..29024208)	2.87101	1.38346	2.60894	0.00431657	0.117891	1
Medtr8g042370	chr8	16329301..16331406	0.605357	6.79213	110.824	0.00437771	0.118985	1
Medtr7g077313	chr7	complement(29197402..29198076)	4.00137	1.14849	2.21682	0.00441288	0.119679	1
Medtr7g105320	chr7	complement(42689176..42690664)	1.4478	1.00616	2.00855	0.00447572	0.120993	1
Medtr4g097700	chr4	complement(40328309..40330658)	0.411532	4.10218	17.1743	0.00448849	0.121208	1
Medtr3g053710	chr3	21375806..21379583	0.237959	3.83014	14.2229	0.00468121	0.124677	1
Medtr8g071815	chr8	complement(30295313..30295855)	1.29174	6.73803	106.746	0.00475368	0.126208	1
Medtr5g080660	chr5	34522376..34523245	1.84774	1.10213	2.14671	0.00505252	0.131376	1
Medtr4g133640	chr4	55907276..55909075	0.228551	2.45679	5.48995	0.00543732	0.138759	1
Medtr1g099500	chr1	complement(44945008..44947117)	0.94405	1.30947	2.4785	0.00551362	0.140469	1
Medtr7g096660	chr7	complement(38792894..38793298)	1.59664	6.62114	98.4381	0.00563003	0.142642	1
Medtr7g092250	chr7	complement(36534180..36538356)	0.127899	2.30687	4.94809	0.00564982	0.142857	1
Medtr8g066280	chr8	27543940..27544755	1.35762	1.44378	2.72032	0.00567362	0.143243	1
Medtr6g033585	chr6	complement(10939006..10942710)	1.5748	1.45598	2.74342	0.00570651	0.143858	1
Medtr2g036500	chr2	complement(15794417..15795779)	0.639414	1.79082	3.46012	0.00572871	0.144273	1
Medtr1g058050	chr1	complement(25548137..25549599)	0.520747	3.31738	9.96853	0.00608194	0.150243	1
Medtr2g038260	chr2	16656511..16658730	0.325312	6.52153	91.8707	0.00624095	0.153196	1
Medtr2g061490	chr2	complement(26060804..26062208)	0.812471	6.88576	118.255	0.00634135	0.155057	1
Medtr8g089530	chr8	complement(37211375..37213549)	1.05578	1.12855	2.18639	0.0064172	0.156381	1
Medtr4g107580	chr4	complement(44562768..44565786)	0.165332	3.65221	12.5726	0.00656504	0.158453	1
Medtr7g077880	chr7	29421803..29423713	0.743479	1.80167	3.48623	0.00699586	0.166619	1
Medtr7g014630	chr7	4195577..4197641	0.745896	1.31916	2.4952	0.00703955	0.167344	1
Medtr1g044105	chr1	16499310..16499891	2.40712	1.16574	2.24349	0.00705578	0.16765	1
Medtr8g058420	chr8	20197505..20199390	1.23027	6.52682	92.2078	0.00754987	0.176399	1
Medtr4g032995	chr4	complement(11430185..11433335)	1.31773	1.52823	2.88432	0.00764907	0.178222	1
Medtr4g064873	chr4	complement(24223252..24223803)	1.00239	6.39815	84.3403	0.00767753	0.178802	1
Medtr5g020960	chr5	8036346..8037078	2.89978	1.22088	2.33089	0.00768317	0.178851	1
Medtr4g066330	chr4	complement(25037019..25042115)	0.844819	1.17641	2.26014	0.00789202	0.182785	1
Medtr5g009190	chr5	complement(2140769..2142420)	0.518762	6.3346	80.7057	0.00802813	0.184759	1
Medtr2g033550	chr2	12770821..12772122	0.420336	2.32644	5.01565	0.00827656	0.18943	1
Medtr1g015000	chr1	3664002..3664639	1.43304	1.4148	2.66622	0.00837747	0.191132	1
Medtr5g023290	chr5	complement(9277750..9278679)	0.394283	3.19906	9.18362	0.00843359	0.191676	1
Medtr8g067960	chr8	28312762..28313490	0.69175	6.25055	76.1383	0.00844344	0.191684	1
Medtr5g005290	chr5	complement(362595..363420)	0.614321	6.26905	77.1207	0.00851193	0.192885	1
Medtr1g088925	chr1	39865722..39866486	0.691198	1.90019	3.73262	0.00869121	0.195723	1
Medtr0578s0010	scaffold0578	complement(1791..2238)	4.84832	1.01932	2.02697	0.00887856	0.198877	1
Medtr5g081360	chr5	34850073..34852831	0.400059	3.69991	12.9952	0.00899438	0.200315	1
Medtr3g116920	chr3	complement(54687788..54688814)	1.44254	1.06854	2.09731	0.00907898	0.201664	1
Medtr7g078060	chr7	complement(29481108..29484296)	0.16763	2.32384	5.00665	0.00935668	0.206199	1
Medtr2g048690	chr2	complement(21477750..21479055)	0.514941	2.85381	7.22906	0.009464	0.207837	1
Medtr7g446340	chr7	complement(15750002..15751823)	1.71093	2.03968	4.11155	0.00953161	0.208867	1
Medtr1g059930	chr1	complement(26085947..26087773)	0.381557	6.25155	76.1912	0.00957471	0.209288	1
Medtr4g071610	chr4	27095155..27100168	0.343672	6.47722	89.0916	0.0098751	0.213702	1
Medtr4g123970	chr4	51119303..51121602	0.604397	1.45244	2.7367	0.0105145	0.22323	1
Medtr4g087120	chr4	complement(34136124..34137689)	0.692226	1.28693	2.44008	0.0105807	0.224258	1
Medtr7g029110	chr7	complement(10196629..10197814)	0.906112	2.09146	4.26178	0.0106915	0.226131	1
Medtr3g465300	chr3	26408512..26411886	0.153762	2.92111	7.57427	0.0108624	0.228062	1
Medtr1g040315	chr1	complement(14872952..14875267)	0.36762	1.97302	3.9259	0.0110494	0.231564	1
Medtr2g030875	chr2	11682754..11684384	2.77749	1.16016	2.23483	0.0111213	0.232795	1
Medtr6g009610	chr6	2926608..2927861	0.487374	1.4526	2.73701	0.0112979	0.234669	1
Medtr7g107210	chr7	complement(43713748..43716111)	0.813311	6.00509	64.2263	0.0112864	0.234669	1
Medtr5g040490	chr5	17801007..17804880	0.149487	1.9648	3.90358	0.011385	0.235652	1
Medtr4g106900	chr4	complement(43925533..43927843)	0.19669	5.94167	61.4641	0.0118301	0.242881	1
Medtr8g461390	chr8	21601067..21603197	0.647252	1.41044	2.65819	0.0119893	0.244248	1
Medtr4g126150	chr4	52442925..52446759	0.361053	1.61765	3.06875	0.0120156	0.244598	1
Medtr3g438050	chr3	13011474..13013852	0.340014	5.94185	61.4718	0.0120425	0.245047	1
Medtr6g037000	chr6	13008428..13009635	0.415683	1.68781	3.22167	0.0121447	0.246629	1
Medtr4g093980	chr4	37156974..37160967	0.240311	2.47553	5.5617	0.0122135	0.247384	1
Medtr7g087170	chr7	complement(33942396..33942919)	0.999567	5.94916	61.7839	0.0123256	0.2489	1
Medtr8g089740	chr8	37374298..37378051	0.419066	1.2466	2.37282	0.0125075	0.252068	1
Medtr8g075780	chr8	32039181..32040099	1.13638	1.30723	2.47466	0.012635	0.254233	1
Medtr6g092630	chr6	complement(34880042..34883399)	0.136032	3.3599	10.2667	0.0127531	0.255691	1
Medtr6g088685	chr6	complement(33822045..33823960)	1.03735	1.31964	2.49603	0.0128251	0.256624	1
Medtr8g012870	chr8	3887987..3888933	1.72548	5.87591	58.7252	0.0130433	0.259224	1
Medtr7g021950	chr7	complement(7013696..7016796)	0.272331	6.04158	65.8715	0.0137045	0.268678	1
Medtr7g109420	chr7	complement(44734916..44735724)	2.32461	1.02951	2.04133	0.0138498	0.270896	1
Medtr5g043830	chr5	complement(19252217..19253164)	0.420149	5.93003	60.9701	0.0138908	0.271487	1
Medtr1g090440	chr1	complement(40514362..40515035)	0.362056	3.36896	10.3314	0.0142792	0.276613	1
Medtr5g092210	chr5	40276477..40278807	0.656705	1.10634	2.15299	0.0147068	0.282184	1
Medtr8g102940	chr8	complement(43356826..43357300)	1.98664	1.26386	2.40138	0.0147957	0.283462	1
Medtr8g433000	chr8	12414302..12417557	0.938227	1.38335	2.60873	0.0150593	0.28677	1
Medtr1g081760	chr1	complement(36376885..36382490)	0.490784	5.87027	58.4963	0.0150772	0.286893	1
Medtr1g007220	chr1	complement(234933..235778)	0.2617	3.24765	9.49817	0.0156338	0.293499	1
Medtr4g120950	chr4	complement(50072677..50073866)	0.718841	1.63576	3.10751	0.0156815	0.293957	1
Medtr1g051025	chr1	complement(19886829..19890537)	0.336613	1.30797	2.47593	0.01575	0.294861	1
Medtr2g043040	chr2	complement(18735139..18736158)	0.300924	2.45424	5.48026	0.0160214	0.297884	1
Medtr4g125015	chr4	51910007..51912248	0.576527	1.69054	3.22777	0.0160239	0.297884	1
Medtr6g464620	chr6	complement(22552607..22554465)	0.353241	1.45936	2.74987	0.016288	0.301185	1
Medtr2g088610	chr2	complement(37361558..37362127)	0.638163	5.79512	55.527	0.0163986	0.302785	1
Medtr6g070900	chr6	complement(25324252..25325244)	0.768315	1.29959	2.46159	0.0165961	0.305537	1
Medtr5g091960	chr5	complement(40140255..40143233)	1.01114	1.18552	2.27445	0.0166582	0.306122	1
Medtr6g009070	chr6	2583076..2592713	0.0923877	5.65748	50.4745	0.0170282	0.309986	1
Medtr8g089585	chr8	complement(37258062..37259289)	0.800797	1.08208	2.11709	0.0170639	0.310279	1
Medtr0341s0020	scaffold0341	complement(4034..9012)	0.179581	5.80112	55.7583	0.0170689	0.310279	1
Medtr2g038710	chr2	complement(16944511..16949783)	0.309795	1.69847	3.24556	0.0173853	0.314364	1
Medtr7g097150	chr7	39053499..39059136	0.206285	5.65871	50.5174	0.0174255	0.314832	1
Medtr6g039630	chr6	complement(14307043..14307879)	0.314445	2.71318	6.55766	0.0174956	0.315759	1
Medtr1g094135	chr1	42318672..42321114	0.158191	2.72418	6.60785	0.0177723	0.31807	1
Medtr2g088860	chr2	complement(37474092..37475502)	0.285455	2.2738	4.83594	0.0178911	0.319255	1
Medtr1g090820	chr1	complement(40845877..40847905)	0.682646	1.22021	2.32981	0.0180297	0.320356	1
Medtr0531s0010	scaffold0531	151..1858	0.808998	5.96496	62.4644	0.0182167	0.32209	1
Medtr2g064400	chr2	complement(29194497..29197000)	0.796651	1.01535	2.02139	0.0186366	0.328213	1
Medtr1g088910	chr1	39846459..39847296	1.57327	1.27974	2.42795	0.0186606	0.328328	1
Medtr1g039240	chr1	complement(14521261..14524897)	0.100187	5.73844	53.3877	0.0187952	0.329432	1
Medtr4g083080	chr4	complement(32329546..32334779)	0.321981	1.83418	3.5657	0.0189578	0.33205	1
Medtr4g134730	chr4	complement(56468646..56472038)	0.653861	1.15621	2.22871	0.019114	0.333726	1
Medtr4g078630	chr4	30370248..30371270	0.374378	5.61505	49.0117	0.0194357	0.337608	1
Medtr2g445130	chr2	complement(19641294..19641968)	0.986196	1.99117	3.97559	0.0196718	0.339837	1
Medtr3g479610	chr3	complement(35848101..35849057)	0.282397	2.77761	6.85717	0.0199648	0.342903	1
Medtr1g103670	chr1	46926221..46928257	0.11959	3.27897	9.70662	0.0199998	0.343154	1
Medtr7g051610	chr7	complement(18088673..18105207)	0.147039	2.72065	6.59168	0.0200897	0.344462	1
Medtr5g062030	chr5	complement(25772535..25772810)	1.05676	5.49104	44.9746	0.0202927	0.346649	1
Medtr6g038400	chr6	13764880..13765233	0.714436	2.17651	4.52058	0.0204439	0.348285	1
Medtr4g022960	chr4	complement(7719854..7722924)	0.0659848	3.12564	8.72792	0.0207182	0.350473	1
Medtr4g123563	chr4	51383236..51386122	0.132762	3.12589	8.72942	0.0209862	0.353464	1
Medtr8g066770	chr8	27763142..27765450	1.84973	1.00579	2.00805	0.0211331	0.354991	1
Medtr8g079980	chr8	34332992..34334302	0.495745	1.24257	2.36619	0.0211465	0.355098	1
Medtr2g438030	chr2	complement(15030791..15032819)	2.17475	1.00902	2.01254	0.0214257	0.358381	1
Medtr1g115340	chr1	52044656..52050661	0.249948	1.08162	2.11641	0.0214761	0.358959	1
Medtr2g014040	chr2	3894264..3895843	0.243685	5.51678	45.7844	0.0217319	0.361797	1
Medtr5g058000	chr5	complement(23939885..23941255)	0.213678	2.28975	4.8897	0.0221972	0.367455	1
Medtr8g033410	chr8	complement(12896960..12899674)	0.799133	1.08064	2.11498	0.0222388	0.367925	1
Medtr1g086490	chr1	complement(38696755..38697783)	1.06099	1.16291	2.23908	0.0223532	0.368732	1
Medtr3g087160	chr3	complement(39525780..39530214)	1.05812	1.05387	2.07609	0.0226805	0.372305	1
Medtr8g088720	chr8	complement(36851051..36851760)	0.474385	2.17303	4.50969	0.0226748	0.372305	1
Medtr1g090930	chr1	41037355..41038396	0.264635	5.40011	42.2276	0.0228307	0.374136	1
Medtr7g056300	chr7	complement(19792266..19792807)	0.379513	3.126	8.73014	0.0230412	0.376181	1
Medtr3g078730	chr3	35522287..35528278	0.747049	1.02306	2.03222	0.0233762	0.379527	1
Medtr8g468470	chr8	complement(24812061..24814400)	0.196859	5.41642	42.7074	0.0237302	0.384037	1
Medtr5g026970	chr5	complement(11173180..11177365)	1.40623	1.05644	2.07979	0.0238242	0.384449	1
Medtr4g094825	chr4	complement(39070790..39072524)	0.239668	5.43164	43.1606	0.0239972	0.385638	1
Medtr2g094450	chr2	40275793..40276865	0.345146	3.14694	8.85773	0.0245605	0.391084	1
Medtr1g076250	chr1	33879901..33882910	1.48921	1.17931	2.26468	0.0247088	0.391943	1
Medtr6g017320	chr6	complement(6964178..6964636)	4.11413	1.00299	2.00414	0.0247485	0.392336	1
Medtr4g007090	chr4	complement(943497..945318)	0.528995	1.30605	2.47263	0.0249011	0.394136	1
Medtr2g011660	chr2	complement(2891380..2892991)	0.663061	1.22812	2.34261	0.0249282	0.394318	1
Medtr4g011370	chr4	complement(2742318..2747766)	0.242219	1.15062	2.22009	0.0251928	0.396638	1
Medtr8g077420	chr8	32867144..32867362	4.12334	1.23337	2.35115	0.0255589	0.400402	1
Medtr1g106460	chr1	complement(48140254..48142311)	0.176701	2.62599	6.17309	0.0259013	0.402763	1
Medtr4g092640	chr4	complement(36744844..36749132)	0.545286	1.14916	2.21784	0.0262654	0.406545	1
Medtr7g071820	chr7	26637118..26637807	0.419401	5.48059	44.65	0.0264243	0.408503	1
Medtr5g006730	chr5	1048994..1050236	0.401514	2.99287	7.96058	0.0265255	0.409386	1
Medtr5g084250	chr5	complement(36354958..36355640)	1.06076	1.44983	2.73176	0.0265807	0.409791	1
Medtr8g051640	chr8	19184767..19188014	0.43109	1.00369	2.00513	0.0267578	0.411766	1
Medtr4g119500	chr4	complement(49536317..49537020)	1.27179	1.22102	2.33112	0.0268881	0.412638	1
Medtr4g083110	chr4	complement(32342776..32343033)	1.0356	5.34899	40.7574	0.0270075	0.413715	1
Medtr8g021237	chr8	7629440..7632401	0.723444	1.11352	2.16372	0.0271067	0.414659	1
Medtr1g011755	chr1	complement(2239566..2245149)	0.103147	5.32448	40.0707	0.0273373	0.415738	1
Medtr5g031530	chr5	complement(13535669..13536526)	1.42783	2.20851	4.62198	0.0273144	0.415738	1
Medtr5g084090	chr5	complement(36299492..36300632)	0.862094	2.99306	7.96159	0.0274434	0.416859	1
Medtr1g105120	chr1	24990496..24991335	0.46763	5.57824	47.7768	0.0277962	0.419865	1
Medtr0229s0020	scaffold0229	complement(5124..9521)	0.400567	5.57824	47.7768	0.027799	0.419865	1
Medtr1g106470	chr1	complement(48145297..48147124)	0.172409	2.47462	5.55822	0.0284143	0.425447	1
Medtr6g018310	chr6	7009014..7010704	1.97346	1.76247	3.39277	0.0289004	0.429168	1
Medtr2g036290	chr2	15723562..15724797	1.84395	1.34579	2.5417	0.0291565	0.43199	1
Medtr6g072100	chr6	complement(26706231..26710199)	1.31256	1.04702	2.06626	0.0294175	0.433899	1
Medtr3g086960	chr3	complement(39427439..39427903)	0.434454	2.34315	5.07408	0.0297935	0.437961	1
Medtr4g088555	chr4	complement(35174504..35179012)	2.73422	1.00259	2.0036	0.0298222	0.438031	1
Medtr8g012810	chr8	3822111..3823110	0.955882	5.19891	36.7305	0.0298278	0.438031	1
Medtr1g016217	chr1	4261883..4262650	2.21018	1.18852	2.27919	0.0299136	0.438906	1
Medtr3g086970	chr3	complement(39428265..39428837)	0.465013	5.199	36.7328	0.0299645	0.43927	1
Medtr6g066380	chr6	24706249..24709800	0.395953	1.24801	2.37514	0.0300685	0.439839	1
Medtr8g064700	chr8	complement(27159491..27162522)	0.177514	1.90045	3.73331	0.0304792	0.444158	1
Medtr8g014840	chr8	4744638..4745877	0.274589	1.90046	3.73333	0.0304982	0.44417	1
Medtr2g019450	chr2	6359654..6362551	0.546585	1.12082	2.1747	0.030523	0.444359	1
Medtr3g033860	chr3	10888618..10892434	0.207454	1.12036	2.17401	0.0307075	0.445886	1
Medtr0008s0390	scaffold0008	complement(236494..237588)	0.858811	1.11159	2.16084	0.0308795	0.447529	1
Medtr1g076910	chr1	complement(34322497..34323349)	0.218054	2.99722	7.98458	0.030976	0.448236	1
Medtr7g030070	chr7	14357996..14362261	0.133375	5.42022	42.8201	0.0316886	0.455544	1
Medtr2g038705	chr2	16941205..16943052	0.209649	5.08647	33.9765	0.0320015	0.458816	1
Medtr5g013670	chr5	4383948..4384379	0.438815	3.01208	8.06728	0.0320303	0.458816	1
Medtr4g080823	chr4	31315296..31321977	0.123562	1.9985	3.99585	0.0320699	0.458932	1
Medtr3g091350	chr3	41555577..41559271	1.4076	1.05705	2.08067	0.0321368	0.459499	1
Medtr7g026030	chr7	complement(8608845..8610855)	0.115565	5.08656	33.9787	0.0321648	0.459508	1
Medtr1g100040	chr1	complement(45074575..45076650)	0.425349	1.16079	2.23579	0.0325414	0.463182	1
Medtr6g023910	chr6	complement(8324295..8325683)	0.223039	5.27575	38.7398	0.0326788	0.464434	1
Medtr8g019710	chr8	complement(7009722..7010138)	0.601544	5.2758	38.7413	0.0326846	0.464434	1
Medtr0078s0010	scaffold0078	2001..3419	0.112617	2.84649	7.19248	0.0329028	0.465698	1
Medtr3g116110	chr3	54288323..54290545	0.61875	1.20209	2.30072	0.0330539	0.466528	1
Medtr5g018340	chr5	complement(6831104..6831841)	1.00095	2.4962	5.64197	0.0330444	0.466528	1
Medtr3g028630	chr3	complement(9159221..9160758)	0.176861	5.08674	33.983	0.0336332	0.471276	1
Medtr5g067410	chr5	complement(28475926..28478850)	0.123637	2.07222	4.20534	0.0338408	0.473314	1
Medtr2g081610	chr2	34250327..34251689	0.551266	1.20876	2.31139	0.0341014	0.475293	1
Medtr8g046730	chr8	18690790..18691762	0.37132	1.76761	3.40489	0.0341554	0.475555	1
Medtr5g026720	chr5	11033739..11034408	0.983879	1.33443	2.52176	0.0357253	0.488513	1
Medtr1g019240	chr1	5755377..5757645	0.23618	2.07232	4.20561	0.0359535	0.490703	1
Medtr7g076570	chr7	28838855..28841098	0.106877	2.84667	7.19339	0.0369273	0.499936	1
Medtr0032s0030	scaffold0032	22499..23553	0.284377	1.7744	3.42095	0.037179	0.502329	1
Medtr3g104240	chr3	complement(48013090..48013626)	0.406434	5.09443	34.1647	0.0373856	0.503438	1
Medtr1g108470	chr1	complement(49028041..49029133)	0.387295	1.40829	2.65422	0.0374584	0.504284	1
Medtr7g016950	chr7	5358846..5361469	0.267491	1.38885	2.6187	0.0376632	0.506176	1
Medtr8g012815	chr8	3826564..3827507	0.81541	4.96501	31.2333	0.0377291	0.506711	1
Medtr5g430430	chr5	complement(12795384..12796797)	0.364027	5.28396	38.9612	0.037807	0.507026	1
Medtr7g007210	chr7	1383567..1386475	0.432686	5.28408	38.9643	0.0377852	0.507026	1
Medtr7g417770	chr7	complement(5694522..5697167)	0.0946807	5.28408	38.9643	0.0378272	0.507026	1
Medtr3g100570	chr3	46254151..46255336	0.611517	1.12435	2.18003	0.0380119	0.508208	1
Medtr5g011350	chr5	complement(3233980..3234803)	0.253575	4.98988	31.7762	0.038621	0.512581	1
Medtr7g066110	chr7	complement(24037709..24038926)	0.375267	4.98322	31.6301	0.03897	0.514327	1
Medtr2g034870	chr2	complement(13387717..13388016)	2.17294	1.11525	2.16632	0.0390976	0.515214	1
Medtr8g007365	chr8	1488848..1489246	1.74774	1.11449	2.16518	0.0393194	0.516652	1
Medtr1g039080	chr1	14483191..14484223	0.188754	2.84661	7.19307	0.0397639	0.520189	1
Medtr2g437610	chr2	14800930..14801313	0.649327	1.80321	3.48995	0.0403223	0.524096	1
Medtr8g020745	chr8	7314128..7316200	0.807636	1.96028	3.89137	0.0409001	0.527798	1
Medtr1g067330	chr1	complement(29010445..29013300)	0.430026	1.32229	2.50063	0.0409894	0.528816	1
Medtr8g079970	chr8	34328895..34330208	0.138998	2.2102	4.62739	0.041112	0.528958	1
Medtr2g055790	chr2	23934904..23935726	0.439513	1.3722	2.58865	0.0411869	0.529249	1
Medtr6g032880	chr6	10218946..10221178	0.122153	2.84671	7.19357	0.0411908	0.529249	1
Medtr1g061570	chr1	complement(26871963..26872497)	0.516215	1.90826	3.75356	0.0416408	0.532589	1
Medtr7g078900	chr7	29880322..29882322	0.336356	1.29851	2.45974	0.0419474	0.535153	1
Medtr7g106770	chr7	complement(43486082..43487788)	0.576763	1.16994	2.25003	0.0420224	0.535724	1
Medtr1g037820	chr1	complement(14071602..14072342)	0.758899	1.16476	2.24196	0.0423942	0.538412	1
Medtr0415s0060	scaffold0415	14576..15530	0.200776	4.93925	30.6804	0.0424782	0.53879	1
Medtr6g065100	chr6	24103958..24105064	0.23472	1.80354	3.49075	0.0433371	0.544347	1
Medtr8g080270	chr8	34505858..34507658	0.223833	1.60428	3.04043	0.0432256	0.544347	1
Medtr3g028640	chr3	complement(9167910..9168710)	0.232342	4.83206	28.4837	0.0436506	0.545973	1
Medtr5g043285	chr5	19029883..19031124	0.557316	1.44108	2.71525	0.043763	0.546431	1
Medtr2g024390	chr2	complement(8791813..8797446)	1.738	1.12429	2.17994	0.0438399	0.54685	1
Medtr8g039110	chr8	14512197..14513962	0.202779	1.80307	3.48961	0.0439501	0.547782	1
Medtr7g446320	chr7	15741827..15743296	0.325225	2.52121	5.74062	0.0445715	0.552424	1
Medtr3g074970	chr3	33871166..33876028	0.107712	2.86732	7.29706	0.04469	0.553485	1
Medtr3g052290	chr3	20701400..20701841	0.421295	2.21023	4.62748	0.0447899	0.55386	1
Medtr3g080990	chr3	36674946..36676295	0.205168	4.84046	28.6499	0.0448034	0.55386	1
Medtr1g112950	chr1	complement(51225967..51227355)	0.119958	2.85695	7.2448	0.0449838	0.555254	1
Medtr0392s0020	scaffold0392	complement(14341..15064)	0.953433	1.13652	2.19849	0.0454154	0.558629	1
Medtr3g085030	chr3	complement(38420546..38421018)	0.910044	1.42056	2.67689	0.0455021	0.559063	1
Medtr4g121923	chr4	complement(50338132..50338904)	0.236554	2.21019	4.62737	0.0455363	0.559297	1
Medtr5g092620	chr5	40455618..40456532	0.246339	2.2102	4.62739	0.0456735	0.560592	1
Medtr8g445960	chr8	17559100..17559731	0.390605	4.89525	29.7589	0.0458449	0.56172	1
Medtr7g078360	chr7	complement(29632890..29634869)	0.277709	1.26054	2.39585	0.046635	0.568226	1
Medtr2g023820	chr2	complement(8433749..8435023)	0.167178	5.04797	33.0819	0.0469503	0.570552	1
Medtr6g072280	chr6	26737479..26737637	1.33323	5.04808	33.0845	0.0469477	0.570552	1
Medtr1g097270	chr1	43870650..43872571	0.819841	1.07619	2.10846	0.0471111	0.571849	1
Medtr3g101510	chr3	complement(46720202..46721404)	0.66178	1.60438	3.04064	0.0477631	0.57588	1
Medtr3g084450	chr3	complement(38117442..38123708)	0.0668626	2.21023	4.6275	0.0478996	0.57687	1
Medtr7g103280	chr7	41770190..41771418	0.20423	1.69914	3.24707	0.0479513	0.577154	1
Medtr4g127660	chr4	53041132..53049570	0.0511841	2.68361	6.4246	0.0482806	0.578771	1
Medtr7g055970	chr7	18934427..18937334	0.0917684	2.68361	6.4246	0.0483156	0.579053	1
Medtr7g079780	chr7	30302725..30304989	0.117113	4.68552	25.7326	0.0485677	0.580975	1
Medtr2g022110	chr2	7567509..7569057	1.1932	1.12052	2.17425	0.0486257	0.581333	1
Medtr5g097060	chr5	42480869..42485742	0.617631	1.04543	2.06398	0.0488639	0.582579	1
Medtr3g113070	chr3	52823631..52824513	0.230623	2.20992	4.62649	0.0491757	0.585052	1
Medtr2g098170	chr2	complement(41957146..41957886)	0.464309	2.03188	4.08939	0.0496184	0.587961	1
Medtr5g020940	chr5	8028597..8031522	0.258859	1.70874	3.26875	0.0500628	0.59142	1
Medtr1g106920	chr1	48060869..48061138	2.27562	1.0755	2.10745	0.0504116	0.594232	1
Medtr4g069950	chr4	26316285..26317822	0.276523	1.34502	2.54034	0.0510341	0.599386	1
Medtr2g011730	chr2	complement(2921774..2927153)	0.288258	1.22121	2.33143	0.0512163	0.600687	1
Medtr2g013480	chr2	3630936..3631660	0.22997	4.68562	25.7342	0.0512641	0.600968	1
Medtr8g013810	chr8	complement(4243041..4244691)	0.244806	1.46974	2.76972	0.051258	0.600968	1
Medtr1g009210	chr1	complement(1224296..1226347)	0.226472	2.68349	6.42407	0.0514664	0.60264	1
Medtr6g006260	chr6	complement(1081747..1084972)	0.0952568	4.69093	25.8291	0.05224	0.607112	1
Medtr3g106230	chr3	49064784..49065723	0.513809	1.12377	2.17915	0.0529546	0.611689	1
Medtr3g079180	chr3	35613644..35616622	0.149847	4.74205	26.7608	0.0530067	0.611867	1
Medtr5g041305	chr5	18155153..18155747	0.28093	4.69949	25.9829	0.0531987	0.612713	1
Medtr4g082980	chr4	complement(32265780..32267388)	0.186098	1.60435	3.04058	0.0533959	0.613151	1
Medtr1g032040	chr1	11336962..11338761	0.159003	4.91378	30.1437	0.0536348	0.614401	1
Medtr4g132260	chr4	complement(55262670..55265824)	0.205389	4.74666	26.8465	0.0536241	0.614401	1
Medtr7g080000	chr7	complement(30393675..30399211)	0.137853	1.44972	2.73154	0.0536558	0.614441	1
Medtr4g043765	chr4	14661915..14663285	0.120515	4.75575	27.0161	0.0537973	0.615363	1
Medtr8g023580	chr8	complement(8543597..8544254)	0.918762	1.8384	3.57613	0.0538673	0.616024	1
Medtr8g093720	chr8	complement(39210195..39210490)	1.28856	1.27888	2.42651	0.0544685	0.619948	1
Medtr8g042830	chr8	complement(16571831..16573581)	0.187284	1.69935	3.24754	0.0546933	0.621245	1
Medtr2g031300	chr2	complement(11729093..11729625)	0.369818	4.75257	26.9567	0.0548986	0.622176	1
Medtr8g464570	chr8	22836589..22852508	0.117863	1.84349	3.58877	0.0550146	0.622932	1
Medtr3g100200	chr3	complement(46046592..46047811)	0.455484	1.1238	2.1792	0.0553489	0.625172	1
Medtr1g088130	chr1	39382581..39383859	2.38821	1.00481	2.00667	0.0558812	0.627994	1
Medtr4g120040	chr4	49759382..49760884	0.705384	1.26195	2.39819	0.0567131	0.633769	1
Medtr7g010210	chr7	2460324..2462646	0.109254	2.19177	4.56866	0.0572323	0.637565	1
Medtr5g018990	chr5	7140287..7141971	0.137879	2.46024	5.5031	0.0575459	0.640098	1
Medtr4g060990	chr4	complement(22439368..22442171)	0.149507	4.52261	22.9849	0.0583247	0.645487	1
Medtr1g019590	chr1	5934153..5934744	0.412565	1.69947	3.24781	0.0585371	0.646986	1
Medtr1g028130	chr1	complement(9437143..9440637)	0.2277	1.37753	2.59823	0.0586258	0.647257	1
Medtr2g089620	chr2	complement(37880385..37882262)	0.28769	1.19885	2.29556	0.0587601	0.64763	1
Medtr4g086165	chr4	33720693..33721543	0.315519	1.6042	3.04027	0.0588634	0.648178	1
Medtr2g449780	chr2	21926214..21935419	0.127945	1.44941	2.73097	0.0589922	0.649008	1
Medtr2g097390	chr2	41588763..41590819	0.0826341	2.88499	7.38699	0.059522	0.652298	1
Medtr4g132460	chr4	complement(55372549..55374380)	0.142898	1.83843	3.5762	0.059703	0.653447	1
Medtr8g078360	chr8	complement(33389609..33390109)	0.301449	4.52271	22.9863	0.0604626	0.658032	1
Medtr8g088830	chr8	36898891..36902120	0.830837	1.24624	2.37223	0.06057	0.658269	1
Medtr8g046440	chr8	complement(18630235..18634576)	0.175097	4.76552	27.1998	0.0614431	0.663833	1
Medtr7g033765	chr7	complement(12338416..12340357)	0.0981554	4.76564	27.2019	0.0615078	0.664248	1
Medtr3g101380	chr3	complement(46666161..46667909)	0.28256	1.69947	3.24783	0.0622982	0.668348	1
Medtr3g099550	chr3	complement(45638431..45639536)	0.23457	1.83864	3.57672	0.062883	0.670982	1
Medtr1g011600	chr1	complement(2095330..2096494)	0.368006	1.40614	2.65028	0.0631431	0.672549	1
Medtr1g031450	chr1	complement(10983716..10988660)	0.111871	4.58342	23.9743	0.0633854	0.673835	1
Medtr7g077215	chr7	complement(29157914..29158544)	0.498928	1.53766	2.90323	0.0636379	0.674968	1
Medtr7g089560	chr7	complement(35068190..35068582)	0.365859	2.69133	6.45909	0.0639132	0.676375	1
Medtr3g085380	chr3	complement(38580046..38585219)	0.217528	1.19888	2.29562	0.0659102	0.689216	1
Medtr4g076570	chr4	29287150..29289422	0.189407	1.83864	3.57672	0.0668433	0.694427	1
Medtr7g102720	chr7	complement(41657865..41659041)	0.123734	2.4998	5.65605	0.0675495	0.698578	1
Medtr1g102800	chr1	46462097..46463026	0.222681	4.47287	22.2059	0.0685221	0.704681	1
Medtr7g084800	chr7	complement(32728615..32732070)	0.480067	1.69486	3.23745	0.0689614	0.706821	1
Medtr5g045180	chr5	19811280..19811809	0.372874	2.06387	4.18106	0.0690265	0.707143	1
Medtr2g014910	chr2	complement(4341708..4342405)	0.62515	1.37303	2.59014	0.0690754	0.707357	1
Medtr7g035095	chr7	complement(13303782..13310837)	0.180316	1.20972	2.31292	0.0694766	0.708732	1
Medtr2g008920	chr2	1684746..1690610	0.058421	4.33883	20.2357	0.0695272	0.708818	1
Medtr4g130340	chr4	54298398..54300586	0.145953	4.33883	20.2357	0.0695191	0.708818	1
Medtr1g026820	chr1	complement(8791012..8792717)	0.240556	2.90046	7.46665	0.0696737	0.709325	1
Medtr8g009200	chr8	complement(2073068..2075189)	0.324452	1.32529	2.50584	0.0703678	0.71292	1
Medtr0047s0160	scaffold0047	84487..85899	0.153023	1.99468	3.98528	0.0704934	0.713191	1
Medtr8g037700	chr8	complement(13972819..13975899)	0.108161	1.61887	3.07134	0.0707354	0.71435	1
Medtr4g075333	chr4	complement(28782249..28784971)	0.0687949	4.60045	24.259	0.0707732	0.714364	1
Medtr3g030860	chr3	complement(9801536..9802279)	0.228894	2.06393	4.18125	0.0713208	0.718509	1
Medtr5g097970	chr5	complement(42902274..42903652)	0.614524	1.29568	2.45493	0.0713731	0.718605	1
Medtr7g082740	chr7	complement(31721631..31722200)	0.530102	1.45922	2.7496	0.0713846	0.718605	1
Medtr3g116240	chr3	54347567..54350033	0.0811325	2.06387	4.18106	0.0714724	0.718764	1
Medtr5g027480	chr5	complement(11440044..11442936)	0.0644277	4.33892	20.237	0.0715664	0.718856	1
Medtr3g079240	chr3	35641016..35644060	0.396286	2.4998	5.65605	0.0719172	0.720666	1
Medtr4g037660	chr4	complement(15017757..15019098)	0.0930181	2.4998	5.65605	0.0719546	0.720747	1
Medtr4g083210	chr4	complement(32387079..32388716)	0.0783875	4.33883	20.2357	0.0721987	0.722044	1
Medtr6g013680	chr6	4298147..4299875	0.11263	4.33883	20.2357	0.0721932	0.722044	1
Medtr8g079700	chr8	complement(34171183..34172148)	0.132588	4.33883	20.2357	0.072219	0.722104	1
Medtr7g058700	chr7	21197374..21201131	0.0450827	4.33883	20.2357	0.0722475	0.722246	1
Medtr8g074510	chr8	31501768..31502778	0.434345	1.1898	2.28121	0.0724868	0.723527	1
Medtr4g010510	chr4	2390910..2391575	0.19767	4.33892	20.237	0.0726534	0.724065	1
Medtr4g019030	chr4	5894206..5897214	0.0437516	4.33892	20.237	0.0726591	0.724065	1
Medtr8g005485	chr8	205162..207254	0.110552	4.54734	23.3822	0.0731172	0.726432	1
Medtr0078s0200	scaffold0078	59944..61026	0.131376	4.54734	23.3822	0.073129	0.726432	1
Medtr8g069800	chr8	29457817..29459054	0.106425	2.49991	5.65652	0.073356	0.727703	1
Medtr0458s0010	scaffold0458	complement(2001..4489)	0.238926	1.22024	2.32985	0.0734057	0.72791	1
Medtr3g437790	chr3	12895099..12895696	0.505103	1.46101	2.75301	0.0736225	0.729255	1
Medtr2g043030	chr2	complement(18732619..18733579)	0.136881	4.35852	20.5138	0.0747798	0.734318	1
Medtr2g049980	chr2	22970793..22972587	0.215997	4.35852	20.5138	0.0747543	0.734318	1
Medtr8g083160	chr8	35113641..35114606	0.263408	4.35848	20.5132	0.0747553	0.734318	1
Medtr1g095970	chr1	complement(43220220..43222639)	0.0812941	4.39012	20.9681	0.0749688	0.734707	1
Medtr8g446030	chr8	complement(17614248..17614703)	0.336889	4.39008	20.9675	0.0749641	0.734707	1
Medtr8g051850	chr8	19263479..19266540	0.192099	4.39008	20.9675	0.0749389	0.734707	1
Medtr8g058607	chr8	complement(20228448..20230557)	0.31791	4.39008	20.9675	0.0749087	0.734707	1
Medtr5g042420	chr5	18647198..18649091	0.559695	1.13792	2.20064	0.0752619	0.736043	1
Medtr4g103840	chr4	42973827..42974746	0.131922	4.33865	20.2331	0.0752866	0.736125	1
Medtr3g096558	chr3	complement(44161571..44162974)	0.415038	4.33722	20.2131	0.0755427	0.736647	1
Medtr2g012480	chr2	complement(3103866..3104045)	0.711555	2.49983	5.65619	0.0761761	0.739678	1
Medtr2g040900	chr2	17918861..17919662	0.424827	1.58691	3.00406	0.0765639	0.741788	1
Medtr4g129290	chr4	53861439..53861746	0.42743	2.49998	5.65677	0.0767267	0.741788	1
Medtr6g077355	chr6	complement(28478852..28479736)	0.152547	4.40213	21.1433	0.0776293	0.746888	1
Medtr5g464590	chr5	26834393..26835072	0.341792	2.11152	4.32146	0.0784436	0.749878	1
Medtr1g054735	chr1	23900602..23904407	0.104667	1.70554	3.26152	0.0785132	0.750241	1
Medtr2g094020	chr2	40058858..40064011	0.0563557	1.90075	3.73407	0.0785317	0.750256	1
Medtr5g092510	chr5	40405214..40406808	0.445181	1.12387	2.1793	0.0792301	0.753665	1
Medtr2g437770	chr2	14910384..14912626	1.71209	1.08497	2.12133	0.0793893	0.75408	1
Medtr6g038300	chr6	complement(13724601..13726521)	0.153155	1.66832	3.17845	0.0794024	0.75408	1
Medtr4g094210	chr4	37405782..37407963	0.257413	1.48392	2.79707	0.0796262	0.755177	1
Medtr8g007325	chr8	1457845..1459524	0.714307	1.44089	2.71489	0.0796601	0.755191	1
Medtr8g079200	chr8	33907486..33908183	0.995203	1.49877	2.82602	0.0798443	0.756031	1
Medtr1g115165	chr1	51836374..51837528	0.377655	1.1934	2.28692	0.0804801	0.757595	1
Medtr3g116940	chr3	complement(54692673..54693449)	0.278283	1.90059	3.73367	0.0806729	0.758097	1
Medtr2055s0010	scaffold2055	complement(81..633)	0.651183	1.70539	3.26117	0.0812371	0.761413	1
Medtr8g042900	chr8	16603964..16606634	0.361014	1.13045	2.18927	0.081886	0.765383	1
Medtr3g450170	chr3	complement(17222573..17224011)	0.202686	1.23982	2.36169	0.081912	0.765463	1
Medtr2g102340	chr2	44066315..44069208	0.102285	2.53028	5.77685	0.0822951	0.767783	1
Medtr1g045100	chr1	complement(16954746..16955861)	0.163791	1.90066	3.73383	0.0826633	0.769632	1
Medtr1g100305	chr1	complement(45202755..45207890)	0.363508	1.12936	2.18762	0.0830314	0.771635	1
Medtr3g060520	chr3	complement(23732931..23733689)	0.178712	4.41366	21.3129	0.0831438	0.771991	1
Medtr3g084170	chr3	complement(38028576..38029058)	0.280832	4.41366	21.3129	0.0831367	0.771991	1
Medtr3g455900	chr3	22026358..22030510	0.059322	4.41376	21.3145	0.0832812	0.772457	1
Medtr5g084530	chr5	complement(36467719..36468748)	3.61094	1.07969	2.11358	0.0832883	0.772457	1
Medtr5g084540	chr5	complement(36475530..36476466)	0.16411	4.41376	21.3145	0.0832461	0.772457	1
Medtr4g056580	chr4	20776362..20777022	0.199648	2.51359	5.71037	0.0833235	0.7725	1
Medtr2g102020	chr2	43900856..43901908	0.103433	4.12818	17.4866	0.0836926	0.773369	1
Medtr3g070250	chr3	31483324..31484974	0.127835	4.12818	17.4866	0.0836926	0.773369	1
Medtr4g106990	chr4	complement(43976500..43978913)	0.151904	4.12818	17.4866	0.0836926	0.773369	1
Medtr2g042430	chr2	18512850..18516182	0.131871	1.90084	3.73431	0.0839467	0.774261	1
Medtr3g062770	chr3	28371717..28374673	0.0563849	4.3895	20.9591	0.0839586	0.774261	1
Medtr4g087850	chr4	complement(34563224..34563764)	0.416032	1.59035	3.01123	0.0838864	0.774261	1
Medtr1g093900	chr1	42142466..42145874	0.0683181	4.12809	17.4855	0.0840358	0.774487	1
Medtr1g105075	chr1	complement(47372738..47373815)	0.539206	1.13194	2.19154	0.0841866	0.77523	1
Medtr6g084570	chr6	complement(31692546..31693241)	0.31328	1.58691	3.00406	0.0845344	0.777439	1
Medtr4g057290	chr4	20965351..20969267	0.0706038	2.49964	5.65544	0.0848523	0.778993	1
Medtr7g058850	chr7	complement(21127288..21127569)	0.385847	4.12818	17.4866	0.0849264	0.779129	1
Medtr4g050863	chr4	complement(18061729..18062995)	0.409767	1.13287	2.19295	0.0850259	0.77926	1
Medtr0019s0110	scaffold0019	60597..60933	0.374644	4.12818	17.4866	0.0850818	0.779346	1
Medtr2g034890	chr2	13396579..13398217	0.315982	1.23997	2.36193	0.085447	0.780561	1
Medtr3g006570	chr3	complement(771260..772405)	0.108649	2.49983	5.65618	0.0860156	0.783797	1
Medtr3g022950	chr3	6918595..6921886	0.0504299	2.49903	5.65305	0.0864264	0.786097	1
Medtr5g049170	chr5	21532826..21539610	0.422974	1.01594	2.02221	0.0866462	0.787859	1
Medtr5g084470	chr5	complement(36445248..36446343)	1.59227	1.17236	2.25381	0.0867446	0.787991	1
Medtr6g011870	chr6	3563596..3564681	0.266274	1.94802	3.85846	0.0874109	0.790026	1
Medtr1g103050	chr1	complement(46617350..46618885)	0.115646	4.128	17.4844	0.087483	0.790077	1
Medtr4g083190	chr4	complement(32380720..32382647)	0.061636	4.128	17.4844	0.0874905	0.790077	1
Medtr5g089130	chr5	38739365..38740058	0.352479	1.90066	3.73383	0.0878124	0.791574	1
Medtr6g034055	chr6	complement(11429678..11430688)	0.255289	1.70557	3.26158	0.0879073	0.791998	1
Medtr4g065123	chr4	complement(24508579..24509045)	0.91065	1.06804	2.09658	0.0884172	0.794001	1
Medtr0008s0470	scaffold0008	complement(261364..262450)	0.299759	1.23983	2.36171	0.0885284	0.794185	1
Medtr4g097940	chr4	complement(40439726..40442807)	0.345575	1.02392	2.03343	0.0886472	0.794413	1
Medtr3g065050	chr3	complement(29344222..29345385)	0.137623	1.90084	3.73431	0.0888644	0.795647	1
Medtr4g036845	chr4	complement(13493526..13496691)	0.0859806	4.12809	17.4855	0.0890875	0.796373	1
Medtr5g034590	chr5	15027658..15029067	0.0958472	4.12809	17.4855	0.089148	0.796631	1
Medtr4g113840	chr4	46857090..46858933	0.829069	1.04323	2.06084	0.0892844	0.797426	1
Medtr2g041550	chr2	18245458..18246370	0.122969	4.12895	17.4959	0.0897091	0.799379	1
Medtr1g027560	chr1	complement(9146410..9146863)	0.326347	4.12891	17.4954	0.089758	0.799395	1
Medtr4g023490	chr4	7937464..7943297	0.0990236	4.12891	17.4954	0.0897613	0.799395	1
Medtr0082s0030	scaffold0082	complement(12724..13839)	0.439364	1.01989	2.02777	0.0897688	0.799395	1
Medtr7g015520	chr7	complement(4795417..4795753)	0.427916	1.90068	3.7339	0.0905417	0.803816	1
Medtr1g062690	chr1	27443237..27444166	0.141851	4.128	17.4844	0.0907542	0.804005	1
Medtr4g030830	chr4	10481298..10482485	0.0975081	4.16315	17.9156	0.0907297	0.804005	1
Medtr4g037615	chr4	13848509..13849134	0.398804	4.16311	17.9152	0.0907585	0.804005	1
Medtr8g101650	chr8	complement(42728526..42730579)	0.330164	1.24464	2.36959	0.0907452	0.804005	1
Medtr8g100130	chr8	40178053..40180864	0.11825	1.40292	2.64437	0.0910905	0.805569	1
Medtr1g106080	chr1	complement(48011115..48012079)	0.284938	1.46539	2.76138	0.0920716	0.811025	1
Medtr3g101820	chr3	46902751..46903162	1.6974	1.01417	2.01975	0.0920771	0.811025	1
Medtr8g089420	chr8	37169852..37171426	0.205619	1.14214	2.20709	0.0923322	0.81143	1
Medtr0094s0010	scaffold0094	6578..7847	1.32184	1.0322	2.04514	0.0923271	0.81143	1
Medtr4g081290	chr4	31501245..31504886	0.116769	1.22328	2.33478	0.0925397	0.812176	1
Medtr8g445860	chr8	17522009..17523129	0.113658	4.18296	18.1634	0.0932281	0.816033	1
Medtr2g072890	chr2	complement(30833936..30836749)	0.100847	2.28924	4.88797	0.0933329	0.816385	1
Medtr7g079730	chr7	30285085..30287321	0.0804049	4.15806	17.8526	0.0946117	0.824245	1
Medtr5g072780	chr5	30979956..30981595	0.141816	2.28918	4.88778	0.0958206	0.830654	1
Medtr8g032000	chr8	complement(11995941..11999887)	0.10275	2.28917	4.88775	0.0958776	0.830764	1
Medtr7g113780	chr7	46891888..46892867	0.290552	1.23957	2.36128	0.0961699	0.830826	1
Medtr1g059660	chr1	25939767..25941449	0.169692	1.90087	3.73438	0.0968724	0.834362	1
Medtr5g069890	chr5	complement(29627002..29628361)	0.122078	1.90087	3.73438	0.0968844	0.834362	1
Medtr5g077590	chr5	33117894..33120316	0.0852318	2.28909	4.88747	0.0972045	0.835418	1
Medtr8g006740	chr8	911366..912146	0.720698	1.06378	2.09041	0.097731	0.837856	1
Medtr4g478260	chr4	complement(30044901..30049273)	0.0774947	4.21248	18.5389	0.098149	0.839439	1
Medtr7g047550	chr7	16654815..16656957	0.11133	4.21248	18.5389	0.0981957	0.839439	1
Medtr6g466030	chr6	complement(23596264..23596676)	0.778412	1.39247	2.62527	0.0983293	0.840177	1
Medtr3g060470	chr3	complement(23714688..23715233)	0.39281	1.58683	3.00389	0.09841	0.840417	1
Medtr7g007680	chr7	complement(1617313..1618738)	0.222436	1.26144	2.39734	0.0984629	0.840417	1
Medtr1g068945	chr1	complement(29498156..29500325)	0.727486	1.28484	2.43655	0.098618	0.841144	1
Medtr2g086040	chr2	complement(36169420..36170996)	0.0733209	4.19911	18.3678	0.0997311	0.845945	1
Medtr6g011880	chr6	3569245..3570411	0.0990806	4.19911	18.3678	0.0997879	0.845995	1
Medtr7g007230	chr7	1393512..1395086	0.140837	4.19911	18.3678	0.0997807	0.845995	1
Medtr0016s0010	scaffold0016	complement(9397..9642)	0.807393	4.199	18.3664	0.0999269	0.846479	1
Medtr8g040600	chr8	complement(15116308..15116610)	0.634094	1.90049	3.73341	0.102187	0.855837	1
Medtr7g098070	chr7	39185730..39191160	0.0488846	2.28927	4.88809	0.10238	0.856578	1
Medtr2g042200	chr2	complement(18419772..18422927)	0.390201	1.13671	2.19879	0.102519	0.856773	1
Medtr3g109270	chr3	complement(50509901..50510236)	0.334456	2.28927	4.88809	0.102517	0.856773	1
Medtr8g463240	chr8	22235541..22237698	0.267818	2.28927	4.88809	0.102514	0.856773	1
Medtr3g058510	chr3	23252617..23253864	0.0980605	2.28933	4.88828	0.102648	0.857425	1
Medtr3g087910	chr3	39843344..39843867	0.388515	1.90086	3.73436	0.103831	0.863301	1
Medtr1g048110	chr1	18212792..18215391	0.1436	1.36146	2.56946	0.10506	0.867512	1
Medtr1g101360	chr1	complement(45783546..45783929)	0.316688	3.88153	14.7386	0.105905	0.867675	1
Medtr1g111320	chr1	complement(50288009..50290748)	0.140432	3.88153	14.7386	0.105905	0.867675	1
Medtr2g032610	chr2	complement(12271454..12274187)	0.419126	1.08509	2.12151	0.105681	0.867675	1
Medtr3g082500	chr3	37242878..37243212	0.35422	3.88135	14.7367	0.105752	0.867675	1
Medtr3g083460	chr3	complement(37653527..37653932)	0.332014	3.88144	14.7377	0.105743	0.867675	1
Medtr3g098450	chr3	complement(44955712..44955915)	0.439431	3.88144	14.7377	0.105743	0.867675	1
Medtr3g116310	chr3	54395052..54395324	0.315294	3.88135	14.7367	0.105752	0.867675	1
Medtr4g124270	chr4	51315466..51316471	0.175012	3.88153	14.7386	0.105905	0.867675	1
Medtr6g461820	chr6	complement(21545479..21545975)	0.226105	3.88144	14.7377	0.105743	0.867675	1
Medtr8g007065	chr8	complement(1219955..1230040)	0.0706414	3.88144	14.7377	0.105743	0.867675	1
Medtr8g015480	chr8	5055245..5059154	0.0921694	1.46544	2.76149	0.105645	0.867675	1
Medtr8g075980	chr8	complement(32138604..32139398)	0.28648	3.88153	14.7386	0.105905	0.867675	1
Medtr8g088450	chr8	36661135..36661449	0.273255	3.88135	14.7367	0.105752	0.867675	1
Medtr1096s0010	scaffold1096	complement(291..2282)	0.04674	3.88153	14.7386	0.105905	0.867675	1
Medtr5g095290	chr5	41652786..41655432	0.095565	1.77609	3.42497	0.106696	0.870904	1
Medtr7g108715	chr7	complement(44398655..44399841)	0.177328	3.88135	14.7367	0.106851	0.871002	1
Medtr3g070340	chr3	complement(31533674..31536436)	0.244351	1.93864	3.83345	0.107057	0.87103	1
Medtr5g018350	chr5	6832908..6834036	0.782622	1.0509	2.07182	0.107341	0.872625	1
Medtr5g080440	chr5	complement(34428909..34430855)	0.120859	2.28905	4.88735	0.108084	0.873705	1
Medtr4g097240	chr4	40076610..40077926	0.0707763	3.88153	14.7386	0.108226	0.874055	1
Medtr0007s0080	scaffold0007	36254..37878	0.34767	1.62316	3.08049	0.108702	0.876339	1
Medtr4g104370	chr4	complement(43180214..43181814)	0.262656	1.25016	2.37869	0.10988	0.880926	1
Medtr5g010940	chr5	3037835..3038624	0.295477	1.40285	2.64424	0.110068	0.881734	1
Medtr3g035733	chr3	13241046..13241402	0.251401	3.88144	14.7377	0.11073	0.883542	1
Medtr6g091980	chr6	34680127..34682652	0.0512207	3.88144	14.7377	0.110732	0.883542	1
Medtr8g077830	chr8	complement(33123362..33127371)	0.05446	3.88144	14.7377	0.110727	0.883542	1
Medtr5g047220	chr5	complement(20688209..20688502)	0.304188	3.88144	14.7377	0.110751	0.883553	1
Medtr1g072610	chr1	complement(32247908..32249909)	0.0635133	2.28909	4.88747	0.110877	0.884003	1
Medtr2g078780	chr2	complement(32982175..32982837)	0.19871	2.28933	4.88828	0.111888	0.888968	1
Medtr8g046580	chr8	18669879..18671345	0.235747	1.29082	2.44667	0.112038	0.889215	1
Medtr3g099060	chr3	complement(45402848..45403414)	0.38418	1.29081	2.44666	0.112542	0.889281	1
Medtr8g040730	chr8	complement(15168737..15172205)	0.0892479	1.89549	3.72048	0.11254	0.889281	1
Medtr5g094600	chr5	complement(41342730..41344062)	0.335704	1.26167	2.39774	0.11275	0.889956	1
Medtr1g069915	chr1	30597285..30599321	0.067342	3.88236	14.7472	0.113076	0.890539	1
Medtr2g032070	chr2	12195542..12196025	0.881067	1.46523	2.76108	0.11293	0.890539	1
Medtr5g058595	chr5	complement(24236593..24236889)	0.460356	3.88232	14.7467	0.113033	0.890539	1
Medtr6g084490	chr6	complement(31645207..31650503)	0.0376899	3.88232	14.7467	0.113002	0.890539	1
Medtr7g071720	chr7	26584299..26585079	0.138947	3.88236	14.7472	0.113092	0.890539	1
Medtr8g012845	chr8	3864245..3865051	0.387825	3.88236	14.7472	0.113062	0.890539	1
Medtr8g042360	chr8	16332078..16332287	0.460356	3.88232	14.7467	0.113087	0.890539	1
Medtr3g012270	chr3	complement(3320429..3322898)	0.0875436	1.46547	2.76154	0.114428	0.897005	1
Medtr1g034330	chr1	12505001..12507909	0.0788747	2.29909	4.92148	0.115404	0.899484	1
Medtr4g127700	chr4	complement(53070790..53071671)	0.189672	3.89904	14.9186	0.115536	0.899661	1
Medtr5g009100	chr5	complement(2091194..2093629)	0.317918	1.06361	2.09015	0.115587	0.899661	1
Medtr8g052490	chr8	complement(19525771..19528405)	0.0748345	3.89904	14.9186	0.115529	0.899661	1
Medtr3g063120	chr3	complement(28566348..28568344)	1.41018	1.00438	2.00609	0.115771	0.900276	1
Medtr3g106680	chr3	49298638..49299261	0.251195	2.32599	5.01408	0.115918	0.900551	1
Medtr7g108910	chr7	complement(44500171..44501861)	0.095617	3.85614	14.4816	0.116063	0.901155	1
Medtr1457s0010	scaffold1457	1..871	0.191666	1.55912	2.94673	0.11608	0.901155	1
Medtr5g032480	chr5	complement(13945016..13945615)	0.223629	2.31464	4.97482	0.116443	0.902004	1
Medtr6g004340	chr6	complement(238268..238699)	0.268147	2.31464	4.97482	0.116433	0.902004	1
Medtr4g038310	chr4	complement(16290420..16293650)	0.0816347	2.31612	4.97991	0.116533	0.902122	1
Medtr6g032895	chr6	10225656..10226609	0.21989	1.55884	2.94617	0.116595	0.902122	1
Medtr8g055900	chr8	24356665..24357024	0.282717	2.28899	4.88713	0.116659	0.902264	1
Medtr3g461430	chr3	24400345..24405292	0.133205	1.4734	2.77676	0.117814	0.906132	1
Medtr0069s0090	scaffold0069	59510..60825	1.13783	1.4155	2.66753	0.11808	0.906548	1
Medtr5g045770	chr5	complement(20073801..20076195)	0.257544	1.19142	2.28378	0.11873	0.908831	1
Medtr4g108153	chr4	44832885..44841828	0.0358045	2.28938	4.88845	0.119631	0.913648	1
Medtr7g114050	chr7	complement(47035278..47035942)	0.902514	1.06333	2.08975	0.119866	0.914285	1
Medtr1g019670	chr1	5960487..5961036	0.642097	1.13882	2.202	0.120913	0.917331	1
Medtr2g078480	chr2	complement(32726569..32728223)	0.142901	3.94642	15.4167	0.121553	0.919974	1
Medtr3g467760	chr3	complement(29976026..29976546)	0.285803	3.94642	15.4167	0.121589	0.919974	1
Medtr3g067540	chr3	complement(30135638..30137452)	0.160326	3.94652	15.4178	0.121498	0.919974	1
Medtr4g133360	chr4	complement(55784221..55784645)	0.287629	3.94652	15.4178	0.121543	0.919974	1
Medtr8g089480	chr8	complement(37194347..37196688)	0.07031	3.94642	15.4167	0.121565	0.919974	1
Medtr0157s0060	scaffold0157	complement(15247..20596)	0.116842	1.71705	3.28763	0.121857	0.921033	1
Medtr4g133790	chr4	complement(55965626..55967085)	0.159436	1.71706	3.28765	0.121994	0.9211	1
Medtr5g024090	chr5	9647473..9652782	0.0749189	1.71705	3.28763	0.121983	0.9211	1
Medtr4g102450	chr4	42465431..42467447	0.405574	1.37086	2.58625	0.12209	0.921408	1
Medtr1g111690	chr1	50505629..50509515	0.100067	1.71699	3.2875	0.122596	0.923172	1
Medtr5g098530	chr5	complement(43142967..43143661)	0.258962	1.71699	3.2875	0.122598	0.923172	1
Medtr1g075430	chr1	33406305..33406881	0.383706	1.29097	2.44692	0.122703	0.923551	1
Medtr4g005380	chr4	complement(232888..233494)	0.258134	1.71699	3.2875	0.122695	0.923551	1
Medtr0038s0070	scaffold0038	40511..40942	0.569657	1.26144	2.39736	0.122917	0.924026	1
Medtr2g450700	chr2	22527544..22527993	0.371216	1.55924	2.94698	0.123765	0.927528	1
Medtr8g087600	chr8	complement(36198973..36201525)	0.167624	1.9477	3.8576	0.125173	0.932127	1
Medtr1g107580	chr1	complement(48912021..48912873)	0.617811	1.15734	2.23047	0.125337	0.932828	1
Medtr4g065097	chr4	complement(24472041..24472490)	0.50744	1.71696	3.28742	0.126059	0.934687	1
Medtr2g055890	chr2	complement(23965859..23967924)	0.0885978	2.30622	4.94587	0.127557	0.941399	1
Medtr2g008930	chr2	1695016..1699739	0.149069	2.30617	4.94567	0.1278	0.941846	1
Medtr8g092700	chr8	38792646..38794334	0.264089	1.06689	2.09492	0.128211	0.94377	1
Medtr3g461500	chr3	complement(24438343..24461019)	0.0409613	1.291	2.44698	0.129576	0.949085	1
Medtr3g014470	chr3	complement(4113349..4115987)	0.105742	1.28603	2.43855	0.129843	0.950209	1
Medtr3g058550	chr3	23269515..23271411	0.27424	1.33238	2.51818	0.131098	0.953792	1
Medtr4g051430	chr4	complement(18346318..18348646)	0.23378	1.14878	2.21727	0.131464	0.954876	1
Medtr3g028150	chr3	complement(8912307..8913228)	0.25352	1.15729	2.23038	0.131488	0.954904	1
Medtr8g471080	chr8	28036790..28037170	1.1119	1.25099	2.38004	0.131957	0.956933	1
Medtr4g035905	chr4	complement(12710398..12711290)	0.324061	1.43126	2.69682	0.132602	0.959634	1
Medtr4g072340	chr4	27435998..27437357	0.178857	1.29051	2.44614	0.134236	0.965109	1
Medtr4g037505	chr4	complement(13800984..13801668)	0.56978	1.04543	2.06399	0.135436	0.968917	1
Medtr8g103430	chr8	43523213..43524826	0.178584	1.71689	3.28728	0.135386	0.968917	1
Medtr4g133840	chr4	55980014..55980714	0.191457	1.71691	3.28731	0.135481	0.96898	1
Medtr5g073900	chr5	31402150..31403345	0.107985	1.71691	3.28731	0.135618	0.969685	1
Medtr6g093180	chr6	complement(35180903..35189212)	0.145274	1.19045	2.28225	0.135833	0.970259	1
Medtr8g052320	chr8	complement(19468164..19470354)	0.124107	1.51993	2.86778	0.135826	0.970259	1
Medtr6g092190	chr6	34749241..34751159	0.0918055	3.77744	13.7127	0.136591	0.972609	1
Medtr3g052760	chr3	20878150..20879311	0.139311	1.71714	3.28784	0.137416	0.976313	1
Medtr1g019410	chr1	5858845..5862486	0.141678	1.29083	2.44668	0.138215	0.97691	1
Medtr1g031520	chr1	complement(11007387..11009795)	0.115494	1.29077	2.44659	0.138171	0.97691	1
Medtr1g083520	chr1	complement(37164769..37167087)	0.166468	1.05674	2.08022	0.13772	0.97691	1
Medtr1g099850	chr1	complement(45067030..45068986)	0.0517052	3.58372	11.9896	0.138303	0.97691	1
Medtr2g041400	chr2	18161470..18162999	0.0551943	3.58362	11.9889	0.138314	0.97691	1
Medtr2g063920	chr2	complement(27086441..27088955)	0.0412353	3.58372	11.9896	0.138303	0.97691	1
Medtr2g096500	chr2	complement(41217267..41219223)	0.106544	3.58372	11.9896	0.138303	0.97691	1
Medtr3g010990	chr3	2664705..2665322	0.119474	3.58372	11.9896	0.138303	0.97691	1
Medtr3g026310	chr3	complement(8102210..8103641)	0.0514865	3.58372	11.9896	0.138303	0.97691	1
Medtr3g045430	chr3	complement(14778106..14780021)	0.0718471	3.58362	11.9889	0.138314	0.97691	1
Medtr3g099980	chr3	45886634..45887385	0.106789	3.58362	11.9889	0.138314	0.97691	1
Medtr4g007150	chr4	complement(973378..975052)	0.105032	3.58362	11.9889	0.138314	0.97691	1
Medtr4g081570	chr4	31662008..31662934	0.1743	3.58372	11.9896	0.138303	0.97691	1
Medtr5g008705	chr5	1892872..1893564	0.101241	3.58362	11.9889	0.138314	0.97691	1
Medtr5g058060	chr5	complement(23974714..23975589)	0.390661	3.58372	11.9896	0.138303	0.97691	1
Medtr6g015850	chr6	5524674..5526056	0.0533875	3.58372	11.9896	0.138303	0.97691	1
Medtr6g033310	chr6	complement(10625142..10627355)	0.0317373	3.58362	11.9889	0.138314	0.97691	1
Medtr6g078430	chr6	complement(29446565..29449816)	0.0320048	3.58372	11.9896	0.138303	0.97691	1
Medtr7g073530	chr7	27490423..27493781	0.115449	1.57814	2.98585	0.13822	0.97691	1
Medtr7g080030	chr7	complement(30415274..30417214)	0.0598933	3.58372	11.9896	0.138303	0.97691	1
Medtr8g011510	chr8	3121217..3122067	0.144283	3.58372	11.9896	0.138303	0.97691	1
Medtr8g099280	chr8	41803250..41805713	0.0428193	3.58362	11.9889	0.138314	0.97691	1
Medtr8g106800	chr8	45087383..45090504	0.0474306	2.04249	4.11957	0.138172	0.97691	1
Medtr0003s0170	scaffold0003	complement(100881..101766)	0.0854823	3.58362	11.9889	0.138314	0.97691	1
Medtr8g464440	chr8	complement(22765991..22766778)	0.218112	2.04244	4.11941	0.138353	0.97705	1
Medtr3g056185	chr3	complement(22353693..22354523)	0.107875	2.04244	4.11941	0.138407	0.977297	1
Medtr4g133627	chr4	55905081..55905715	0.141171	2.04243	4.11939	0.138438	0.977339	1
Medtr7g084910	chr7	32808032..32812961	0.0685351	2.04243	4.11939	0.138486	0.977339	1
Medtr8g103510	chr8	complement(43548263..43549336)	0.0833684	2.04244	4.11941	0.138491	0.977339	1
Medtr3g105240	chr3	complement(48528741..48530417)	0.127546	2.04244	4.11941	0.138519	0.977403	1
Medtr1g068875	chr1	29452541..29454293	0.0783356	2.04244	4.11941	0.138564	0.977583	1
Medtr4g079580	chr4	complement(30767465..30768533)	0.218658	1.15746	2.23065	0.138891	0.978798	1
Medtr4g006110	chr4	507991..509277	0.252198	1.38306	2.6082	0.139203	0.980383	1
Medtr4g006150	chr4	513798..515160	0.0888128	2.23204	4.69796	0.139794	0.98252	1
Medtr7g068250	chr7	complement(24945452..24948405)	0.588959	1.15731	2.23041	0.139809	0.98252	1
Medtr1g012950	chr1	2737894..2738674	0.155265	1.71682	3.2871	0.140017	0.983569	1
Medtr3g067495	chr3	30078302..30079263	0.250177	1.15746	2.23065	0.140405	0.98468	1
Medtr7g101850	chr7	41073959..41074222	0.253046	3.58353	11.9881	0.141249	0.987116	1
Medtr6g033915	chr6	11244083..11245069	0.0675764	3.58353	11.9881	0.141314	0.98732	1
Medtr2g008730	chr2	1591372..1593732	0.073618	3.58353	11.9881	0.141344	0.987336	1
Medtr2g078940	chr2	33052067..33052701	0.22022	3.58381	11.9904	0.141604	0.987702	1
Medtr5g460870	chr5	complement(25258175..25259118)	0.0987193	3.58381	11.9904	0.14158	0.987702	1
Medtr7g056207	chr7	complement(19642281..19643351)	0.0721729	3.58381	11.9904	0.14159	0.987702	1
Medtr8g007040	chr8	complement(1195180..1202938)	0.0489533	3.58381	11.9904	0.14163	0.987752	1
Medtr6g041980	chr6	complement(14489364..14495406)	0.177582	1.14882	2.21732	0.142181	0.988993	1
Medtr2g082730	chr2	complement(34711977..34713913)	0.120713	1.45287	2.73753	0.142986	0.991041	1
Medtr7g100510	chr7	complement(40469671..40473051)	0.119605	1.33253	2.51844	0.142952	0.991041	1
Medtr3g112400	chr3	complement(52663193..52664110)	0.360876	2.04252	4.11965	0.14349	0.99246	1
Medtr1g093160	chr1	complement(33789951..33790576)	0.220523	3.59605	12.0926	0.144586	0.99556	1
Medtr2g091210	chr2	complement(39345425..39345835)	0.18833	3.59605	12.0926	0.144547	0.99556	1
Medtr8g091680	chr8	38257869..38260373	0.0561797	3.59612	12.0932	0.144582	0.99556	1
Medtr4g011650	chr4	2905408..2908796	0.268024	3.59612	12.0932	0.144651	0.995604	1
Medtr3g078190	chr3	35216944..35220034	0.0794146	3.59612	12.0932	0.144714	0.995787	1
Medtr3g436100	chr3	12109408..12110688	0.10064	3.59612	12.0932	0.144777	0.995927	1
Medtr4g069200	chr4	26010191..26010639	0.399541	1.33235	2.51812	0.145774	0.99924	1
Medtr1g007030	chr1	complement(164282..167260)	0.0246449	1.36902	2.58294	0.350549	0.999995	1
Medtr1g007157	chr1	204529..205657	0.0993715	1.90447	3.74371	0.468355	0.999995	1
Medtr1g007195	chr1	228462..229903	0.0615157	1.90447	3.74371	0.468355	0.999995	1
Medtr1g007230	chr1	complement(235826..236154)	0.117473	2.69877	6.49247	0.280376	0.999995	1
Medtr1g007260	chr1	250502..251671	0.0165619	1.90447	3.74371	0.468355	0.999995	1
Medtr1g007410	chr1	344159..345370	0.0159003	1.90447	3.74371	0.468355	0.999995	1
Medtr1g008450	chr1	908671..910315	0.01614	1.90447	3.74371	0.468355	0.999995	1
Medtr1g008500	chr1	934387..937180	0.0354033	3.2476	9.49786	0.19793	0.999995	1
Medtr1g008590	chr1	973945..976004	0.0139808	1.90447	3.74371	0.468355	0.999995	1
Medtr1g009420	chr1	1347598..1351585	0.0345385	2.69877	6.49247	0.280376	0.999995	1
Medtr1g010180	chr1	1792069..1792751	0.0516732	1.90447	3.74371	0.468355	0.999995	1
Medtr1g010190	chr1	1793366..1794171	0.0492489	1.90438	3.74347	0.468379	0.999995	1
Medtr1g011540	chr1	complement(2066824..2068509)	0.0424698	2.69868	6.49206	0.280395	0.999995	1
Medtr1g011670	chr1	complement(2174678..2174997)	0.0978659	1.90447	3.74371	0.468355	0.999995	1
Medtr1g011990	chr1	complement(2303846..2308235)	0.0528038	1.2123	2.31707	0.243708	0.999995	1
Medtr1g012010	chr1	2309421..2310654	0.0268014	1.90447	3.74371	0.468355	0.999995	1
Medtr1g012335	chr1	2419343..2421249	0.0518504	1.74477	3.35142	0.215777	0.999995	1
Medtr1g012470	chr1	complement(2480152..2480838)	0.032622	1.90447	3.74371	0.468355	0.999995	1
Medtr1g012490	chr1	2489576..2490011	0.0579081	1.90438	3.74347	0.468379	0.999995	1
Medtr1g013630	chr1	3339673..3341296	0.0137588	1.90438	3.74347	0.468379	0.999995	1
Medtr1g013620	chr1	3341399..3342924	0.0282569	1.90447	3.74371	0.468355	0.999995	1
Medtr1g013410	chr1	complement(3429068..3429558)	0.0714462	2.69868	6.49206	0.280395	0.999995	1
Medtr1g015290	chr1	3764474..3765010	0.10766	3.2476	9.49786	0.197973	0.999995	1
Medtr1g015710	chr1	4006830..4007033	0.0949874	1.90447	3.74371	0.468355	0.999995	1
Medtr1g015720	chr1	4010083..4011834	0.0431937	1.90438	3.74347	0.468379	0.999995	1
Medtr1g016060	chr1	4186114..4190494	0.0462559	1.25972	2.39449	0.285526	0.999995	1
Medtr1g016200	chr1	complement(4252785..4253229)	0.111703	2.69868	6.49206	0.280395	0.999995	1
Medtr1g016400	chr1	4355120..4356277	0.0167335	1.90447	3.74371	0.468355	0.999995	1
Medtr1g016460	chr1	4391438..4391668	0.0684368	1.90438	3.74347	0.468379	0.999995	1
Medtr1g016830	chr1	4517762..4518777	0.0803341	2.69868	6.49206	0.280395	0.999995	1
Medtr1g016910	chr1	4554263..4556861	0.0153424	1.90447	3.74371	0.468355	0.999995	1
Medtr1g017120	chr1	complement(4674635..4676165)	0.0125873	1.90447	3.74371	0.468355	0.999995	1
Medtr1g017130	chr1	4677451..4679818	0.01076	1.90447	3.74371	0.468355	0.999995	1
Medtr1g017800	chr1	complement(5053981..5055104)	0.0202481	1.90447	3.74371	0.468355	0.999995	1
Medtr1g018030	chr1	5159586..5160386	0.0437954	2.69868	6.49206	0.280395	0.999995	1
Medtr1g018280	chr1	complement(5174351..5180825)	0.0114061	1.90438	3.74347	0.468379	0.999995	1
Medtr1g018580	chr1	complement(5390686..5392038)	0.0175992	1.90447	3.74371	0.468355	0.999995	1
Medtr1g018590	chr1	complement(5394224..5395861)	0.0133409	1.90438	3.74347	0.468379	0.999995	1
Medtr1g019650	chr1	complement(5950928..5951475)	0.0382782	1.90438	3.74347	0.468379	0.999995	1
Medtr1g019850	chr1	6058875..6060267	0.0269904	1.90447	3.74371	0.468355	0.999995	1
Medtr1g021295	chr1	6349743..6351176	0.163287	1.39594	2.6316	0.170895	0.999995	1
Medtr1g021380	chr1	6390073..6392547	0.0967562	1.50628	2.84076	0.206147	0.999995	1
Medtr1g021460	chr1	complement(6430026..6430629)	0.0339977	1.90438	3.74347	0.468379	0.999995	1
Medtr1g021965	chr1	6715727..6716811	0.0299411	1.90438	3.74347	0.468379	0.999995	1
Medtr1g022010	chr1	6755214..6759848	0.0759777	1.74477	3.35142	0.240277	0.999995	1
Medtr1g022290	chr1	7023184..7024154	0.140499	3.20811	9.24137	0.190148	0.999995	1
Medtr1g022465	chr1	complement(7187442..7193328)	0.0160012	1.90447	3.74371	0.468355	0.999995	1
Medtr1g023470	chr1	complement(7505849..7507514)	0.043061	1.90447	3.74371	0.468355	0.999995	1
Medtr1g023965	chr1	7741635..7742815	0.016743	1.90447	3.74371	0.468355	0.999995	1
Medtr1g024850	chr1	7899288..7900166	0.0672828	1.90447	3.74371	0.468355	0.999995	1
Medtr1g026350	chr1	8547538..8548351	0.199849	1.75488	3.37498	0.210626	0.999995	1
Medtr1g027610	chr1	complement(9178905..9179550)	0.0751845	2.69868	6.49206	0.280395	0.999995	1
Medtr1g027650	chr1	complement(9210341..9210656)	0.0694532	1.90447	3.74371	0.468355	0.999995	1
Medtr1g027820	chr1	9298986..9300905	0.0315748	1.39224	2.62486	0.382514	0.999995	1
Medtr1g027930	chr1	complement(9349830..9350828)	0.0387089	2.69868	6.49206	0.280395	0.999995	1
Medtr1g029590	chr1	10184799..10185166	0.0694532	1.90447	3.74371	0.468355	0.999995	1
Medtr1g029940	chr1	complement(10414923..10417921)	0.00684832	1.90447	3.74371	0.468355	0.999995	1
Medtr1g030400	chr1	10561241..10562801	0.0172704	1.90447	3.74371	0.468355	0.999995	1
Medtr1g030440	chr1	complement(10588266..10588769)	0.146709	1.74472	3.35129	0.241411	0.999995	1
Medtr1g031220	chr1	10906841..10907122	0.773201	1.27001	2.41164	0.180965	0.999995	1
Medtr1g031500	chr1	complement(11000837..11001148)	0.0506696	1.90438	3.74347	0.468379	0.999995	1
Medtr1g031740	chr1	11128719..11131379	0.0309329	1.90447	3.74371	0.468355	0.999995	1
Medtr1g032030	chr1	complement(11334292..11334842)	0.0339977	1.90438	3.74347	0.468379	0.999995	1
Medtr1g032550	chr1	11583531..11591979	0.0360919	1.74453	3.35086	0.223853	0.999995	1
Medtr1g032560	chr1	complement(11592956..11593715)	0.0744675	2.69877	6.49247	0.280376	0.999995	1
Medtr1g032750	chr1	11708333..11710148	0.0968637	2.69877	6.49247	0.280376	0.999995	1
Medtr1g033010	chr1	11847982..11851130	0.0542657	1.03054	2.04279	0.305861	0.999995	1
Medtr1g033650	chr1	12149473..12150205	0.172064	1.39566	2.63109	0.38219	0.999995	1
Medtr1g033790	chr1	complement(12211412..12211862)	0.106763	2.70192	6.50668	0.280934	0.999995	1
Medtr1g033840	chr1	12239375..12241751	0.0864465	1.16915	2.24878	0.181384	0.999995	1
Medtr1g034040	chr1	12313855..12314628	0.0479058	1.90438	3.74347	0.468379	0.999995	1
Medtr1g034260	chr1	12453692..12454578	0.260916	1.48221	2.79376	0.164993	0.999995	1
Medtr1g034420	chr1	complement(12535170..12536372)	0.0160193	1.90447	3.74371	0.468355	0.999995	1
Medtr1g036290	chr1	13292672..13293744	0.0520899	1.90447	3.74371	0.468355	0.999995	1
Medtr1g036730	chr1	13493699..13494301	0.0321351	1.90447	3.74371	0.468355	0.999995	1
Medtr1g036770	chr1	13526838..13527314	0.0331424	1.90438	3.74347	0.468379	0.999995	1
Medtr1g037700	chr1	13987360..13989653	0.0365947	1.90438	3.74347	0.468379	0.999995	1
Medtr1g037730	chr1	complement(14004769..14006153)	0.118133	1.35797	2.56325	0.221864	0.999995	1
Medtr1g038430	chr1	complement(14127710..14130893)	0.0229115	2.69859	6.49165	0.280413	0.999995	1
Medtr1g040060	chr1	14663973..14664243	0.112697	1.90447	3.74371	0.468355	0.999995	1
Medtr1g040077	chr1	complement(14675993..14678471)	0.0356057	3.49981	11.3122	0.166733	0.999995	1
Medtr1g040130	chr1	14704872..14705279	0.0387473	1.90438	3.74347	0.468379	0.999995	1
Medtr1g040735	chr1	15099065..15099699	0.0835234	2.70192	6.50668	0.280935	0.999995	1
Medtr1g041290	chr1	15354064..15354506	0.0731894	1.90438	3.74347	0.468379	0.999995	1
Medtr1g041565	chr1	complement(15593990..15596238)	0.0237033	2.70192	6.50668	0.280937	0.999995	1
Medtr1g041605	chr1	15606491..15608168	0.099678	2.69868	6.49206	0.280395	0.999995	1
Medtr1g042480	chr1	complement(15847811..15848320)	0.041169	1.90438	3.74347	0.468379	0.999995	1
Medtr1g043540	chr1	16340754..16341868	0.0471471	1.90447	3.74371	0.468355	0.999995	1
Medtr1g043700	chr1	complement(16396108..16396655)	0.0402022	1.90447	3.74371	0.468355	0.999995	1
Medtr1g046760	chr1	17646998..17647222	0.0861219	1.90447	3.74371	0.468355	0.999995	1
Medtr1g046950	chr1	17711193..17711621	0.0449212	1.90447	3.74371	0.468355	0.999995	1
Medtr1g047400	chr1	17933030..17935692	0.030531	2.69868	6.49206	0.280395	0.999995	1
Medtr1g047710	chr1	complement(18035932..18038155)	0.0468054	1.90447	3.74371	0.468355	0.999995	1
Medtr1g047970	chr1	complement(18142918..18148923)	0.00495276	1.90447	3.74371	0.468355	0.999995	1
Medtr1g048130	chr1	18219459..18222635	0.0121651	2.69877	6.49247	0.280376	0.999995	1
Medtr1g040490	chr1	18624465..18625096	0.0250141	1.90438	3.74347	0.468379	0.999995	1
Medtr1g040420	chr1	complement(18654556..18656003)	0.0922735	1.90447	3.74371	0.468355	0.999995	1
Medtr1g049000	chr1	complement(18928313..18929767)	0.033988	1.90447	3.74371	0.468355	0.999995	1
Medtr1g049210	chr1	19012468..19012983	0.0373472	1.90447	3.74371	0.468355	0.999995	1
Medtr1g050395	chr1	complement(19332190..19336598)	0.00861219	1.90447	3.74371	0.468355	0.999995	1
Medtr1g050438	chr1	19408327..19410099	0.00891648	1.90438	3.74347	0.468379	0.999995	1
Medtr1g050488	chr1	19476727..19477298	0.0708689	2.69868	6.49206	0.280395	0.999995	1
Medtr1g050875	chr1	complement(19772708..19774124)	0.064524	1.41848	2.67303	0.378317	0.999995	1
Medtr1g050915	chr1	complement(19786337..19787313)	0.0257981	1.90447	3.74371	0.468355	0.999995	1
Medtr1g050925	chr1	19788192..19789339	0.0756696	2.69868	6.49206	0.280395	0.999995	1
Medtr1g051685	chr1	complement(20572967..20573266)	0.298459	1.25972	2.39449	0.285071	0.999995	1
Medtr1g052130	chr1	21010395..21010649	0.0755732	1.90447	3.74371	0.468355	0.999995	1
Medtr1g052185	chr1	21073526..21074362	0.0230241	1.90447	3.74371	0.468355	0.999995	1
Medtr1g052610	chr1	complement(21520177..21520724)	0.0648861	1.90447	3.74371	0.468355	0.999995	1
Medtr1g052870	chr1	complement(21925287..21925645)	0.0566628	1.90438	3.74347	0.468379	0.999995	1
Medtr1g053175	chr1	22206725..22207078	0.280062	1.74486	3.35163	0.231411	0.999995	1
Medtr1g053180	chr1	22210159..22212905	0.0406236	1.90447	3.74371	0.468355	0.999995	1
Medtr1g053265	chr1	complement(22335059..22335725)	0.217724	3.2475	9.49721	0.199337	0.999995	1
Medtr1g053430	chr1	22469741..22471617	0.0187461	2.69868	6.49206	0.280395	0.999995	1
Medtr1g053830	chr1	complement(22810137..22811379)	0.193066	3.20811	9.24137	0.189863	0.999995	1
Medtr1g054045	chr1	23037207..23037446	0.0658705	1.90438	3.74347	0.468379	0.999995	1
Medtr1g054265	chr1	complement(23310044..23310553)	0.0377866	1.90447	3.74371	0.468355	0.999995	1
Medtr1g054570	chr1	complement(23676020..23677633)	0.183497	1.50643	2.84107	0.193631	0.999995	1
Medtr1g054730	chr1	complement(23898621..23900521)	0.0330391	2.70192	6.50668	0.280938	0.999995	1
Medtr1g054745	chr1	complement(23921064..23922784)	0.0960087	1.74981	3.36313	0.243294	0.999995	1
Medtr1g054765	chr1	complement(23936722..23937943)	0.0241796	1.90447	3.74371	0.468355	0.999995	1
Medtr1g054865	chr1	24041840..24046332	0.0211889	2.69877	6.49247	0.280376	0.999995	1
Medtr1g055185	chr1	complement(24358763..24360213)	0.0251911	1.90447	3.74371	0.468355	0.999995	1
Medtr1g105230	chr1	25023304..25024114	0.0769308	2.70204	6.5072	0.279717	0.999995	1
Medtr1g058230	chr1	complement(25629097..25633906)	0.0118508	1.90438	3.74347	0.468379	0.999995	1
Medtr1g060280	chr1	26234650..26235657	0.0348017	2.69868	6.49206	0.280395	0.999995	1
Medtr1g061280	chr1	complement(26788888..26799728)	0.0100566	1.90438	3.74347	0.468379	0.999995	1
Medtr1g061760	chr1	complement(26972832..26975642)	0.0766759	1.50643	2.84107	0.193505	0.999995	1
Medtr1g062320	chr1	27186247..27187562	0.0167721	1.90447	3.74371	0.468355	0.999995	1
Medtr1g062480	chr1	27297665..27299968	0.0543262	1.90438	3.74347	0.468379	0.999995	1
Medtr1g062540	chr1	27358017..27362934	0.131509	1.23025	2.34607	0.266747	0.999995	1
Medtr1g063780	chr1	complement(28001111..28001762)	0.0868071	1.90447	3.74371	0.468355	0.999995	1
Medtr1g063920	chr1	28082889..28092018	0.0108072	2.69868	6.49206	0.280395	0.999995	1
Medtr1g064150	chr1	28230801..28231905	0.0190535	1.90447	3.74371	0.468355	0.999995	1
Medtr1g066680	chr1	28653860..28657113	0.0197653	1.90447	3.74371	0.468355	0.999995	1
Medtr1g066830	chr1	complement(28719952..28721216)	0.0136166	1.90438	3.74347	0.468379	0.999995	1
Medtr1g066920	chr1	complement(28766542..28766996)	0.0556823	1.90447	3.74371	0.468355	0.999995	1
Medtr1g067190	chr1	complement(28927350..28928613)	0.0192236	1.90447	3.74371	0.468355	0.999995	1
Medtr1g068835	chr1	complement(29422359..29424202)	0.0926934	1.56399	2.9567	0.21869	0.999995	1
Medtr1g068860	chr1	29442549..29443682	0.016994	1.90447	3.74371	0.468355	0.999995	1
Medtr1g069085	chr1	29654650..29655253	0.0319059	1.90447	3.74371	0.468355	0.999995	1
Medtr1g069090	chr1	29657573..29659225	0.0444548	2.70204	6.5072	0.279717	0.999995	1
Medtr1g069530	chr1	30151952..30156222	0.00934133	1.90447	3.74371	0.468355	0.999995	1
Medtr1g069865	chr1	complement(30548825..30553406)	0.0508407	2.69868	6.49206	0.280395	0.999995	1
Medtr1g072545	chr1	32197253..32197683	0.0814178	1.90447	3.74371	0.468355	0.999995	1
Medtr1g073210	chr1	complement(32483650..32485698)	0.00940516	1.90447	3.74371	0.468355	0.999995	1
Medtr1g073270	chr1	32517067..32517583	0.0765565	2.69859	6.49165	0.280413	0.999995	1
Medtr1g073430	chr1	complement(32601119..32601610)	0.18924	1.25976	2.39455	0.276155	0.999995	1
Medtr1g073440	chr1	32604043..32605095	0.0201848	1.90447	3.74371	0.468355	0.999995	1
Medtr1g073640	chr1	complement(32673521..32675028)	0.0600414	3.20801	9.24078	0.189877	0.999995	1
Medtr1g073720	chr1	32716787..32717732	0.115132	1.00175	2.00243	0.323798	0.999995	1
Medtr1g074250	chr1	32992934..32993329	0.0486646	1.90447	3.74371	0.468355	0.999995	1
Medtr1g074910	chr1	33102600..33102848	0.077821	1.90447	3.74371	0.468355	0.999995	1
Medtr1g075030	chr1	33155126..33159787	0.0158485	2.69859	6.49165	0.280413	0.999995	1
Medtr1g093370	chr1	33837791..33839628	0.029772	1.90438	3.74347	0.468379	0.999995	1
Medtr1g076490	chr1	complement(34080279..34081835)	0.0281799	1.90438	3.74347	0.468379	0.999995	1
Medtr1g076840	chr1	34299918..34301020	0.088158	3.20811	9.24137	0.189863	0.999995	1
Medtr1g077300	chr1	complement(34484403..34484923)	0.11117	1.36916	2.58321	0.361144	0.999995	1
Medtr1g077520	chr1	complement(34592298..34598094)	0.00966938	1.90447	3.74371	0.468355	0.999995	1
Medtr1g077620	chr1	complement(34654524..34656196)	0.155562	1.25957	2.39425	0.296143	0.999995	1
Medtr1g077700	chr1	34710163..34710723	0.0345409	1.90447	3.74371	0.468355	0.999995	1
Medtr1g078330	chr1	35079207..35080838	0.0319588	1.90447	3.74371	0.468355	0.999995	1
Medtr1g078410	chr1	complement(35123450..35125244)	0.0347266	1.90447	3.74371	0.468355	0.999995	1
Medtr1g079560	chr1	complement(35363161..35363439)	0.0690723	1.90447	3.74371	0.468355	0.999995	1
Medtr1g080475	chr1	complement(35859083..35859440)	0.220299	3.20792	9.2402	0.189891	0.999995	1
Medtr1g080830	chr1	35959779..35960436	0.0529438	1.90447	3.74371	0.468355	0.999995	1
Medtr1g081750	chr1	36372091..36376631	0.0160358	3.20801	9.24078	0.189877	0.999995	1
Medtr1g082440	chr1	36646969..36651054	0.057475	1.5064	2.841	0.18368	0.999995	1
Medtr1g082815	chr1	36843555..36843991	0.0684368	1.90438	3.74347	0.468379	0.999995	1
Medtr1g083500	chr1	37158150..37160011	0.0110602	1.90447	3.74371	0.468355	0.999995	1
Medtr1g083510	chr1	complement(37161962..37163968)	0.0109663	1.90447	3.74371	0.468355	0.999995	1
Medtr1g083630	chr1	complement(37214098..37220601)	0.0102364	1.90447	3.74371	0.468355	0.999995	1
Medtr1g083983	chr1	37425147..37425825	0.168505	1.74462	3.35108	0.215158	0.999995	1
Medtr1g083987	chr1	37426635..37428276	0.0230115	1.90438	3.74347	0.468379	0.999995	1
Medtr1g084590	chr1	complement(37644759..37645113)	0.262869	1.26352	2.40082	0.318499	0.999995	1
Medtr1g484990	chr1	37861884..37862141	0.0751064	1.90447	3.74371	0.468355	0.999995	1
Medtr1g084900	chr1	37911462..37911837	0.0932981	2.69868	6.49206	0.280395	0.999995	1
Medtr1g085440	chr1	38160233..38160956	0.0471471	1.90447	3.74371	0.468355	0.999995	1
Medtr1g085510	chr1	complement(38187117..38191492)	0.0135815	1.90438	3.74347	0.468379	0.999995	1
Medtr1g085520	chr1	38194083..38194787	0.0573547	1.90447	3.74371	0.468355	0.999995	1
Medtr1g085990	chr1	38478113..38478490	0.0705904	1.90447	3.74371	0.468355	0.999995	1
Medtr1g087380	chr1	complement(39163611..39166053)	0.0457242	1.00175	2.00243	0.323885	0.999995	1
Medtr1g087810	chr1	complement(39299634..39301659)	0.0163147	1.90438	3.74347	0.468379	0.999995	1
Medtr1g088160	chr1	complement(39390473..39392282)	0.0133178	1.90447	3.74371	0.468355	0.999995	1
Medtr1g088210	chr1	complement(39462973..39463437)	0.0831153	2.69877	6.49247	0.280376	0.999995	1
Medtr1g088930	chr1	complement(39874061..39878466)	0.040095	1.39621	2.63208	0.170913	0.999995	1
Medtr1g089820	chr1	40206622..40207689	0.0181437	1.90447	3.74371	0.468355	0.999995	1
Medtr1g090420	chr1	40507541..40508971	0.0529111	2.69868	6.49206	0.280395	0.999995	1
Medtr1g090530	chr1	complement(40543610..40545002)	0.0572572	2.69877	6.49247	0.280376	0.999995	1
Medtr1g090697	chr1	complement(40676925..40677428)	0.20881	1.00172	2.00238	0.356168	0.999995	1
Medtr1g090937	chr1	41043426..41044253	0.0232744	1.90447	3.74371	0.468355	0.999995	1
Medtr1g092520	chr1	41456597..41456881	0.0676182	1.90447	3.74371	0.468355	0.999995	1
Medtr1g492700	chr1	41545563..41548566	0.0220881	2.69868	6.49206	0.280395	0.999995	1
Medtr1g093390	chr1	complement(41947273..41947988)	0.20962	1.21237	2.31717	0.219866	0.999995	1
Medtr1g093670	chr1	complement(42004062..42006623)	0.0185657	1.90447	3.74371	0.468355	0.999995	1
Medtr1g093720	chr1	42036151..42039583	0.0150561	1.90438	3.74347	0.468379	0.999995	1
Medtr1g093995	chr1	42212142..42212990	0.0642701	2.70192	6.50668	0.280939	0.999995	1
Medtr1g095875	chr1	complement(43167143..43168541)	0.306751	1.0019	2.00263	0.35404	0.999995	1
Medtr1g097170	chr1	43842729..43844215	0.150856	1.14263	2.20783	0.224848	0.999995	1
Medtr1g098980	chr1	44611262..44614499	0.020303	1.36911	2.58311	0.360106	0.999995	1
Medtr1g099085	chr1	complement(44682006..44685227)	0.0112565	1.90447	3.74371	0.468355	0.999995	1
Medtr1g099350	chr1	44848696..44849748	0.106923	1.00991	2.01378	0.37702	0.999995	1
Medtr1g100050	chr1	complement(45077811..45079785)	0.0136269	1.90447	3.74371	0.468355	0.999995	1
Medtr1g100355	chr1	45235049..45236633	0.144937	3.20801	9.24078	0.189877	0.999995	1
Medtr1g100385	chr1	45243164..45245196	0.0399628	1.3691	2.58309	0.358518	0.999995	1
Medtr1g100713	chr1	45652977..45656651	0.0165192	1.90438	3.74347	0.468379	0.999995	1
Medtr1g100773	chr1	45701770..45702195	0.0825971	2.69868	6.49206	0.280395	0.999995	1
Medtr1g101400	chr1	complement(45802199..45804656)	0.031891	2.69868	6.49206	0.280395	0.999995	1
Medtr1g102335	chr1	46208614..46209128	0.0579081	1.90438	3.74347	0.468379	0.999995	1
Medtr1g102730	chr1	complement(46427991..46429254)	0.0936108	1.90447	3.74371	0.468355	0.999995	1
Medtr1g102740	chr1	46432941..46433614	0.284403	1.25968	2.39443	0.301935	0.999995	1
Medtr1g103180	chr1	complement(46677103..46682000)	0.0175999	1.90447	3.74371	0.468355	0.999995	1
Medtr1g103470	chr1	46828698..46829625	0.0319372	1.90438	3.74347	0.468379	0.999995	1
Medtr1g103520	chr1	complement(46849287..46850384)	0.0652439	1.90447	3.74371	0.468355	0.999995	1
Medtr1g104940	chr1	47310962..47311330	0.0428426	1.90438	3.74347	0.468379	0.999995	1
Medtr1g104990	chr1	47322354..47323507	0.0634896	1.90438	3.74347	0.468379	0.999995	1
Medtr1g105460	chr1	47460119..47461939	0.0171092	1.90438	3.74347	0.468379	0.999995	1
Medtr1g105530	chr1	complement(47519494..47520034)	0.0636012	1.90447	3.74371	0.468355	0.999995	1
Medtr1g105585	chr1	47571940..47575425	0.00982221	1.90447	3.74371	0.468355	0.999995	1
Medtr1g105715	chr1	47692360..47692623	0.0729969	1.90447	3.74371	0.468355	0.999995	1
Medtr1g105725	chr1	47696010..47699186	0.121602	1.05141	2.07255	0.166473	0.999995	1
Medtr1g105730	chr1	complement(47700407..47701462)	0.0254572	1.90438	3.74347	0.468379	0.999995	1
Medtr1g105865	chr1	47797015..47797480	0.0621072	1.90447	3.74371	0.468355	0.999995	1
Medtr1g105880	chr1	47805416..47806017	0.230262	1.3691	2.58309	0.358295	0.999995	1
Medtr1g105950	chr1	complement(47875653..47876002)	0.0550605	1.90447	3.74371	0.468355	0.999995	1
Medtr1g105980	chr1	complement(47901343..47904222)	0.0137137	1.90447	3.74371	0.468355	0.999995	1
Medtr1g106075	chr1	48006741..48007669	0.0320819	1.90447	3.74371	0.468355	0.999995	1
Medtr1g106100	chr1	complement(48031113..48032132)	0.117113	1.36902	2.58294	0.347434	0.999995	1
Medtr1g106810	chr1	48096627..48096870	0.0917675	1.90447	3.74371	0.468355	0.999995	1
Medtr1g106490	chr1	complement(48151568..48151951)	0.0504621	1.90447	3.74371	0.468355	0.999995	1
Medtr1g106560	chr1	48176221..48176400	0.107652	1.90447	3.74371	0.468355	0.999995	1
Medtr1g106945	chr1	complement(48407072..48407480)	0.0483453	1.90438	3.74347	0.468379	0.999995	1
Medtr1g107410	chr1	48700935..48701255	0.399334	1.21246	2.31732	0.218925	0.999995	1
Medtr1g109550	chr1	complement(49547628..49548059)	0.0894644	2.69877	6.49247	0.280376	0.999995	1
Medtr1g110060	chr1	49629155..49631421	0.0122835	1.90438	3.74347	0.468379	0.999995	1
Medtr1g110930	chr1	complement(50086559..50088597)	0.0189547	2.69877	6.49247	0.280376	0.999995	1
Medtr1g111310	chr1	complement(50275098..50281639)	0.0710542	1.02317	2.03238	0.276366	0.999995	1
Medtr1g112880	chr1	complement(51181470..51182999)	0.0377728	1.90447	3.74371	0.468355	0.999995	1
Medtr1g113050	chr1	51285379..51287420	0.150388	1.31241	2.48357	0.300746	0.999995	1
Medtr1g115385	chr1	complement(52090920..52091351)	0.0448552	1.90447	3.74371	0.468355	0.999995	1
Medtr1g115560	chr1	52244942..52246669	0.0315763	3.20801	9.24078	0.189877	0.999995	1
Medtr1g115580	chr1	52266613..52267645	0.105539	1.00181	2.00251	0.334862	0.999995	1
Medtr1g115970	chr1	complement(52401016..52402976)	0.0807393	1.90447	3.74371	0.468355	0.999995	1
Medtr1g116020	chr1	52423031..52425297	0.0318185	1.90447	3.74371	0.468355	0.999995	1
Medtr1g116930	chr1	complement(52808805..52811683)	0.0250112	3.20811	9.24137	0.190151	0.999995	1
Medtr2g005250	chr2	104518..105668	0.126523	1.74459	3.35099	0.228978	0.999995	1
Medtr2g005455	chr2	169575..172516	0.0242615	2.69877	6.49247	0.280376	0.999995	1
Medtr2g006240	chr2	complement(509161..510183)	0.033988	1.90447	3.74371	0.468355	0.999995	1
Medtr2g006930	chr2	729409..732877	0.0593944	3.63943	12.4617	0.151569	0.999995	1
Medtr2g007210	chr2	864627..866538	0.198831	1.03638	2.05108	0.229857	0.999995	1
Medtr2g007445	chr2	986965..988337	0.328155	1.74477	3.35142	0.215777	0.999995	1
Medtr2g008320	chr2	1401961..1404001	0.0579296	3.63943	12.4617	0.15156	0.999995	1
Medtr2g009290	chr2	1860925..1861200	0.0698231	1.90447	3.74371	0.468355	0.999995	1
Medtr2g010010	chr2	2189447..2189975	0.189261	1.74471	3.35127	0.241263	0.999995	1
Medtr2g010250	chr2	2292738..2294592	0.0170446	2.69859	6.49165	0.280413	0.999995	1
Medtr2g010290	chr2	2309007..2310762	0.0112829	1.90447	3.74371	0.468355	0.999995	1
Medtr2g010350	chr2	2335984..2341334	0.0385299	3.20811	9.24137	0.190146	0.999995	1
Medtr2g011140	chr2	complement(2659202..2660353)	0.0167284	1.90447	3.74371	0.468355	0.999995	1
Medtr2g011370	chr2	complement(2753455..2756005)	0.0165192	1.90438	3.74347	0.468379	0.999995	1
Medtr2g011590	chr2	complement(2829224..2829718)	0.0638744	2.69859	6.49165	0.280413	0.999995	1
Medtr2g012410	chr2	3073402..3073872	0.115395	1.36901	2.58293	0.35131	0.999995	1
Medtr2g012900	chr2	complement(3367485..3375571)	0.00642639	1.90438	3.74347	0.468379	0.999995	1
Medtr2g012920	chr2	complement(3386747..3387627)	0.257458	1.0363	2.05096	0.23313	0.999995	1
Medtr2g013330	chr2	3569793..3572400	0.00954644	1.90438	3.74347	0.468379	0.999995	1
Medtr2g013920	chr2	3826720..3828487	0.232186	1.17298	2.25476	0.253981	0.999995	1
Medtr2g014050	chr2	3897681..3899109	0.0556095	2.69877	6.49247	0.280376	0.999995	1
Medtr2g014270	chr2	complement(4009253..4009568)	0.210614	2.70204	6.5072	0.279717	0.999995	1
Medtr2g014410	chr2	complement(4109456..4111159)	0.0314605	2.69859	6.49165	0.280413	0.999995	1
Medtr2g015290	chr2	complement(4497086..4501425)	0.00681345	1.90447	3.74371	0.468355	0.999995	1
Medtr2g015340	chr2	4531851..4533121	0.0364924	1.90447	3.74371	0.468355	0.999995	1
Medtr2g015750	chr2	4702733..4702993	0.0742431	1.90447	3.74371	0.468355	0.999995	1
Medtr2g015850	chr2	4742638..4745104	0.0664065	1.7448	3.35148	0.233425	0.999995	1
Medtr2g016210	chr2	4921801..4922880	0.0264719	1.90447	3.74371	0.468355	0.999995	1
Medtr2g018030	chr2	5293973..5295046	0.0506064	1.36901	2.58293	0.35196	0.999995	1
Medtr2g017890	chr2	complement(5300394..5302257)	0.0307601	2.70204	6.5072	0.279717	0.999995	1
Medtr2g017720	chr2	complement(5435484..5437660)	0.0121701	1.90438	3.74347	0.468379	0.999995	1
Medtr2g017730	chr2	5445117..5446928	0.0106353	1.90447	3.74371	0.468355	0.999995	1
Medtr2g017955	chr2	complement(5585552..5587290)	0.0381477	1.36892	2.58278	0.347471	0.999995	1
Medtr2g018135	chr2	5689564..5699272	0.00817268	1.90447	3.74371	0.468355	0.999995	1
Medtr2g018320	chr2	5763292..5769070	0.00513446	1.90447	3.74371	0.468355	0.999995	1
Medtr2g018350	chr2	5820381..5827523	0.0153227	1.36916	2.58321	0.361099	0.999995	1
Medtr2g018640	chr2	complement(5884167..5884511)	0.0664523	1.90447	3.74371	0.468355	0.999995	1
Medtr2g018850	chr2	6002946..6005884	0.00978659	1.90447	3.74371	0.468355	0.999995	1
Medtr2g019750	chr2	complement(6506699..6507974)	0.0453917	1.3691	2.58309	0.358869	0.999995	1
Medtr2g019950	chr2	6587344..6588014	0.0524387	2.69868	6.49206	0.280395	0.999995	1
Medtr2g020310	chr2	6746682..6747950	0.100311	1.74477	3.35142	0.215777	0.999995	1
Medtr2g020630	chr2	complement(6894825..6898956)	0.0121871	1.90447	3.74371	0.468355	0.999995	1
Medtr2g021540	chr2	complement(7332250..7332678)	0.0449212	1.90447	3.74371	0.468355	0.999995	1
Medtr2g021640	chr2	complement(7370528..7371305)	0.0975081	1.36911	2.58311	0.360482	0.999995	1
Medtr2g022810	chr2	7944420..7946533	0.0163039	1.90447	3.74371	0.468355	0.999995	1
Medtr2g022980	chr2	complement(8001040..8007155)	0.0129511	1.90447	3.74371	0.468355	0.999995	1
Medtr2g023310	chr2	8213499..8216198	0.0659097	1.90447	3.74371	0.468355	0.999995	1
Medtr2g023980	chr2	complement(8516544..8518990)	0.0196327	1.90447	3.74371	0.468355	0.999995	1
Medtr2g024110	chr2	8578715..8579845	0.0170391	1.90447	3.74371	0.468355	0.999995	1
Medtr2g024140	chr2	complement(8590982..8594447)	0.0279292	3.2476	9.49786	0.198015	0.999995	1
Medtr2g024430	chr2	8822969..8825549	0.0226616	2.69868	6.49206	0.280395	0.999995	1
Medtr2g025040	chr2	complement(8879139..8881076)	0.0640928	1.74471	3.35127	0.215935	0.999995	1
Medtr2g025130	chr2	complement(8932429..8933808)	0.0139646	1.90447	3.74371	0.468355	0.999995	1
Medtr2g025230	chr2	complement(8987040..8989959)	0.207139	2.04252	4.11965	0.151594	0.999995	1
Medtr2g025810	chr2	complement(9246646..9251025)	0.0222023	3.20801	9.24078	0.189877	0.999995	1
Medtr2g426060	chr2	complement(9314974..9318747)	0.0406276	1.19647	2.29178	0.308621	0.999995	1
Medtr2g026630	chr2	complement(9661648..9661848)	0.0964052	1.90447	3.74371	0.468355	0.999995	1
Medtr2g026920	chr2	9795993..9796890	0.0643803	3.2476	9.49786	0.198	0.999995	1
Medtr2g027220	chr2	9934035..9935894	0.0188603	2.69868	6.49206	0.280395	0.999995	1
Medtr2g027310	chr2	complement(9973190..9973357)	0.438861	1.74471	3.35127	0.216011	0.999995	1
Medtr2g030030	chr2	complement(11258026..11258442)	0.0379111	1.90438	3.74347	0.468379	0.999995	1
Medtr2g030160	chr2	complement(11297043..11299607)	0.0137179	2.69868	6.49206	0.280395	0.999995	1
Medtr2g030210	chr2	11329708..11331520	0.0513898	1.90447	3.74371	0.468355	0.999995	1
Medtr2g030600	chr2	11553735..11559240	0.00760409	1.90438	3.74347	0.468379	0.999995	1
Medtr2g031460	chr2	complement(11810159..11812181)	0.0538384	1.50634	2.84089	0.184575	0.999995	1
Medtr2g031750	chr2	complement(12029162..12031833)	0.01849	2.69859	6.49165	0.280413	0.999995	1
Medtr2g032040	chr2	12168897..12185858	0.0568471	2.70204	6.5072	0.279717	0.999995	1
Medtr2g033860	chr2	12904947..12905141	0.0988265	1.90447	3.74371	0.468355	0.999995	1
Medtr2g033930	chr2	complement(12944530..12946060)	0.135132	1.02295	2.03208	0.278951	0.999995	1
Medtr2g034150	chr2	complement(13045984..13046877)	0.0398713	1.90447	3.74371	0.468355	0.999995	1
Medtr2g034200	chr2	13068628..13070138	0.071517	2.69868	6.49206	0.280395	0.999995	1
Medtr2g034340	chr2	13113982..13114665	0.272085	1.35132	2.55146	0.168421	0.999995	1
Medtr2g034495	chr2	complement(13165531..13168214)	0.117439	1.90447	3.74371	0.468355	0.999995	1
Medtr2g035140	chr2	13510460..13512988	0.0231069	1.90447	3.74371	0.468355	0.999995	1
Medtr2g035290	chr2	13563732..13564265	0.32238	1.33205	2.51759	0.151194	0.999995	1
Medtr2g436410	chr2	complement(14154667..14156271)	0.0385583	1.90438	3.74347	0.468379	0.999995	1
Medtr2g436500	chr2	14185039..14188005	0.0458095	1.90447	3.74371	0.468355	0.999995	1
Medtr2g437230	chr2	14558489..14559955	0.112626	1.25959	2.39428	0.285997	0.999995	1
Medtr2g437620	chr2	14804454..14805154	0.0276426	1.90447	3.74371	0.468355	0.999995	1
Medtr2g437710	chr2	complement(14857129..14858455)	0.0290447	2.70204	6.5072	0.279717	0.999995	1
Medtr2g437840	chr2	14944550..14946740	0.0105043	1.90438	3.74347	0.468379	0.999995	1
Medtr2g437930	chr2	15001809..15002353	0.462771	2.04235	4.11915	0.146415	0.999995	1
Medtr2g036000	chr2	15263703..15264128	0.0371101	1.90438	3.74347	0.468379	0.999995	1
Medtr2g036030	chr2	15275335..15275796	0.0417125	1.90447	3.74371	0.468355	0.999995	1
Medtr2g036063	chr2	15299283..15299947	0.0786513	1.90438	3.74347	0.468379	0.999995	1
Medtr2g438230	chr2	complement(15422017..15423157)	0.0658854	1.36892	2.58276	0.347473	0.999995	1
Medtr2g438440	chr2	complement(15517147..15524111)	0.00911167	1.90447	3.74371	0.468355	0.999995	1
Medtr2g438580	chr2	complement(15601177..15601431)	0.07599	1.90447	3.74371	0.468355	0.999995	1
Medtr2g036450	chr2	15777346..15777656	0.194889	2.69868	6.49206	0.280395	0.999995	1
Medtr2g036780	chr2	15921784..15925006	0.00980094	1.90438	3.74347	0.468379	0.999995	1
Medtr2g037300	chr2	16200003..16200584	0.0399215	1.90438	3.74347	0.468379	0.999995	1
Medtr2g037380	chr2	16222824..16223314	0.130485	3.20792	9.2402	0.189891	0.999995	1
Medtr2g037565	chr2	16288412..16289517	0.0490361	1.90447	3.74371	0.468355	0.999995	1
Medtr2g037900	chr2	complement(16436443..16437258)	0.0237469	1.90447	3.74371	0.468355	0.999995	1
Medtr2g038625	chr2	16848996..16850491	0.321674	1.19608	2.29116	0.334619	0.999995	1
Medtr2g038645	chr2	16871167..16871451	0.11094	2.69859	6.49165	0.280413	0.999995	1
Medtr2g039040	chr2	17093134..17094904	0.0111557	1.90447	3.74371	0.468355	0.999995	1
Medtr2g039235	chr2	17184446..17184754	0.0623663	1.90447	3.74371	0.468355	0.999995	1
Medtr2g039697	chr2	complement(17405503..17407843)	0.0202004	1.90447	3.74371	0.468355	0.999995	1
Medtr2g040590	chr2	complement(17801994..17802436)	0.195185	1.74462	3.35108	0.215158	0.999995	1
Medtr2g041440	chr2	complement(18200382..18201607)	0.0535895	1.90438	3.74347	0.468379	0.999995	1
Medtr2g042225	chr2	complement(18433310..18433788)	0.0414932	1.90438	3.74347	0.468379	0.999995	1
Medtr2g043200	chr2	18792703..18805972	0.0123976	1.90447	3.74371	0.468355	0.999995	1
Medtr2g043410	chr2	complement(18913296..18914552)	0.0125767	1.90438	3.74347	0.468379	0.999995	1
Medtr2g044040	chr2	complement(19143850..19144479)	0.0307578	1.90447	3.74371	0.468355	0.999995	1
Medtr2g044060	chr2	19149528..19149740	0.090475	1.90447	3.74371	0.468355	0.999995	1
Medtr2g044120	chr2	complement(19179525..19186450)	0.991389	1.04299	2.0605	0.229401	0.999995	1
Medtr2g045320	chr2	19911810..19912352	0.0603659	1.90447	3.74371	0.468355	0.999995	1
Medtr2g045660	chr2	20016410..20016574	0.234234	2.69877	6.49247	0.280376	0.999995	1
Medtr2g046030	chr2	complement(20168619..20170083)	0.0135466	1.90438	3.74347	0.468379	0.999995	1
Medtr2g046300	chr2	complement(20292040..20295525)	0.0146379	1.90438	3.74347	0.468379	0.999995	1
Medtr2g046820	chr2	complement(20581965..20583402)	0.0134753	1.90447	3.74371	0.468355	0.999995	1
Medtr2g047852	chr2	20926805..20927504	0.0313551	1.90447	3.74371	0.468355	0.999995	1
Medtr2g048520	chr2	21392684..21393295	0.0314888	1.90447	3.74371	0.468355	0.999995	1
Medtr2g049030	chr2	complement(21550386..21552157)	0.155438	1.73061	3.31868	0.150011	0.999995	1
Medtr2g049575	chr2	complement(21840688..21841215)	0.0450261	1.90447	3.74371	0.468355	0.999995	1
Medtr2g450160	chr2	22117367..22124550	0.0314258	2.04235	4.11915	0.14634	0.999995	1
Medtr2g450170	chr2	complement(22127980..22130774)	0.118875	3.20801	9.24078	0.189877	0.999995	1
Medtr2g049960	chr2	22964363..22966290	0.0563971	3.20811	9.24137	0.189863	0.999995	1
Medtr2g050020	chr2	22984382..22984887	0.0418225	1.90438	3.74347	0.468379	0.999995	1
Medtr2g054750	chr2	complement(23382437..23383920)	0.0541328	2.69868	6.49206	0.280395	0.999995	1
Medtr2g055800	chr2	complement(23937555..23937797)	0.0650572	1.90438	3.74347	0.468379	0.999995	1
Medtr2g055840	chr2	23947265..23948386	0.0171757	1.90447	3.74371	0.468355	0.999995	1
Medtr2g055900	chr2	complement(23970620..23971941)	0.0261127	1.90447	3.74371	0.468355	0.999995	1
Medtr2g058410	chr2	complement(24142113..24143408)	0.179453	1.40011	2.63921	0.184121	0.999995	1
Medtr2g058430	chr2	complement(24148653..24150954)	0.0239228	1.90447	3.74371	0.468355	0.999995	1
Medtr2g058670	chr2	complement(24242502..24244330)	0.0133921	1.90447	3.74371	0.468355	0.999995	1
Medtr2g461820	chr2	25570265..25570732	0.34878	1.02275	2.03179	0.273979	0.999995	1
Medtr2g060710	chr2	complement(25744900..25747612)	0.0142586	1.90447	3.74371	0.468355	0.999995	1
Medtr2g061690	chr2	26166865..26169358	0.0184021	1.90447	3.74371	0.468355	0.999995	1
Medtr2g062200	chr2	complement(26247742..26248587)	0.0566628	2.69859	6.49165	0.280413	0.999995	1
Medtr2g062370	chr2	complement(26332295..26335616)	0.0683935	1.21222	2.31694	0.238276	0.999995	1
Medtr2g063470	chr2	26753305..26753861	0.0393257	1.90438	3.74347	0.468379	0.999995	1
Medtr2g063807	chr2	26955499..26956456	0.0448552	1.90447	3.74371	0.468355	0.999995	1
Medtr2g065450	chr2	complement(27443342..27447459)	0.0108877	1.90447	3.74371	0.468355	0.999995	1
Medtr2g065670	chr2	27532053..27537913	0.00876411	1.90447	3.74371	0.468355	0.999995	1
Medtr2g066200	chr2	complement(27735357..27736526)	0.0165619	1.90447	3.74371	0.468355	0.999995	1
Medtr2g066270	chr2	27769842..27771527	0.0334671	1.90447	3.74371	0.468355	0.999995	1
Medtr2g066780	chr2	27905457..27905721	0.113318	1.90447	3.74371	0.468355	0.999995	1
Medtr2g067150	chr2	28068313..28071825	0.032458	3.2475	9.49721	0.199359	0.999995	1
Medtr2g067360	chr2	28182427..28183416	0.0195732	1.90447	3.74371	0.468355	0.999995	1
Medtr2g067450	chr2	28220441..28222272	0.037359	2.69868	6.49206	0.280395	0.999995	1
Medtr2g068850	chr2	complement(28588051..28589040)	0.0237371	1.90438	3.74347	0.468379	0.999995	1
Medtr2g069520	chr2	complement(28923152..28924685)	0.0151861	1.90447	3.74371	0.468355	0.999995	1
Medtr2g064670	chr2	29305267..29305518	0.0627338	1.90438	3.74347	0.468379	0.999995	1
Medtr2g070060	chr2	29488070..29489572	0.133719	1.23025	2.34607	0.266846	0.999995	1
Medtr2g070290	chr2	complement(29568816..29569736)	0.404303	1.50616	2.84053	0.197583	0.999995	1
Medtr2g070660	chr2	complement(29792618..29793475)	0.0301122	1.90438	3.74347	0.468379	0.999995	1
Medtr2g070670	chr2	29797040..29797401	0.0617536	1.90438	3.74347	0.468379	0.999995	1
Medtr2g071840	chr2	30019385..30019646	0.189975	2.70192	6.50668	0.280941	0.999995	1
Medtr2g072770	chr2	complement(30746694..30747501)	0.0394094	1.90447	3.74371	0.468355	0.999995	1
Medtr2g073020	chr2	complement(30908038..30910832)	0.0455583	2.70204	6.5072	0.279717	0.999995	1
Medtr2g073700	chr2	complement(31269243..31271161)	0.0558585	1.90447	3.74371	0.468355	0.999995	1
Medtr2g074830	chr2	complement(31280473..31283951)	0.0137848	1.90447	3.74371	0.468355	0.999995	1
Medtr2g075235	chr2	complement(31447457..31448105)	0.0667043	1.90438	3.74347	0.468379	0.999995	1
Medtr2g075300	chr2	complement(31476697..31479607)	0.0109784	1.90438	3.74347	0.468379	0.999995	1
Medtr2g075405	chr2	31536953..31537406	0.0793052	1.90447	3.74371	0.468355	0.999995	1
Medtr2g075630	chr2	31634243..31635206	0.0241916	1.90447	3.74371	0.468355	0.999995	1
Medtr2g075730	chr2	31672036..31672386	0.0552064	1.90447	3.74371	0.468355	0.999995	1
Medtr2g076290	chr2	complement(31950543..31952399)	0.0156369	1.90438	3.74347	0.468379	0.999995	1
Medtr2g076470	chr2	complement(32026989..32028781)	0.183716	1.36907	2.58304	0.348062	0.999995	1
Medtr2g076740	chr2	complement(32127708..32128046)	0.0568471	1.90447	3.74371	0.468355	0.999995	1
Medtr2g077640	chr2	complement(32272570..32275446)	0.0694196	3.20801	9.24078	0.189877	0.999995	1
Medtr2g077980	chr2	32305367..32306694	0.0223823	1.90447	3.74371	0.468355	0.999995	1
Medtr2g078130	chr2	complement(32437418..32437841)	0.0911524	2.69877	6.49247	0.280376	0.999995	1
Medtr2g078180	chr2	32478514..32485868	0.0304603	1.90438	3.74347	0.468379	0.999995	1
Medtr2g078220	chr2	32528949..32531501	0.0306848	2.70192	6.50668	0.280942	0.999995	1
Medtr2g078440	chr2	complement(32684289..32685859)	0.016066	1.90438	3.74347	0.468379	0.999995	1
Medtr2g078490	chr2	complement(32728608..32733711)	0.0120282	1.90447	3.74371	0.468355	0.999995	1
Medtr2g078580	chr2	32800898..32802335	0.081269	3.20811	9.24137	0.190141	0.999995	1
Medtr2g078790	chr2	complement(32986653..32988070)	0.10125	1.39224	2.62486	0.382281	0.999995	1
Medtr2g079340	chr2	33397219..33397825	0.184234	1.25966	2.3944	0.27144	0.999995	1
Medtr2g079380	chr2	33409641..33411289	0.0735438	1.36911	2.58311	0.360011	0.999995	1
Medtr2g079900	chr2	33686871..33687883	0.101453	3.2475	9.49721	0.199352	0.999995	1
Medtr2g079980	chr2	33718115..33721018	0.0088121	1.90438	3.74347	0.468379	0.999995	1
Medtr2g081040	chr2	complement(33949610..33955361)	0.014557	1.90438	3.74347	0.468379	0.999995	1
Medtr2g018230	chr2	34156150..34156305	0.123533	1.90447	3.74371	0.468355	0.999995	1
Medtr2g081655	chr2	complement(34264659..34268472)	0.00818267	1.90438	3.74347	0.468379	0.999995	1
Medtr2g081805	chr2	34327499..34329454	0.0194658	1.90447	3.74371	0.468355	0.999995	1
Medtr2g082010	chr2	complement(34459560..34462924)	0.0204691	2.69868	6.49206	0.280395	0.999995	1
Medtr2g082060	chr2	complement(34483691..34488466)	0.0556824	2.04253	4.11967	0.151265	0.999995	1
Medtr2g082450	chr2	complement(34539660..34541087)	0.0356366	1.36892	2.58276	0.347473	0.999995	1
Medtr2g082370	chr2	complement(34571417..34571857)	0.0878795	2.70192	6.50668	0.280944	0.999995	1
Medtr2g082490	chr2	complement(34616414..34616848)	0.11723	3.20792	9.24019	0.189891	0.999995	1
Medtr2g082930	chr2	34780062..34780849	0.0245907	1.90447	3.74371	0.468355	0.999995	1
Medtr2g083260	chr2	complement(34954393..34960893)	0.0133549	1.90447	3.74371	0.468355	0.999995	1
Medtr2g083560	chr2	complement(35073071..35073754)	0.0231124	1.90438	3.74347	0.468379	0.999995	1
Medtr2g083800	chr2	complement(35157587..35157820)	0.0828096	1.90447	3.74371	0.468355	0.999995	1
Medtr2g083955	chr2	35252469..35252702	0.165165	2.69877	6.49247	0.280376	0.999995	1
Medtr2g084105	chr2	complement(35319568..35320092)	0.0655482	1.90447	3.74371	0.468355	0.999995	1
Medtr2g084170	chr2	35343416..35343832	0.0462138	1.90447	3.74371	0.468355	0.999995	1
Medtr2g084190	chr2	35348105..35348431	0.166537	3.20801	9.24078	0.189877	0.999995	1
Medtr2g084200	chr2	complement(35355355..35355991)	0.212438	1.73873	3.33741	0.152319	0.999995	1
Medtr2g084215	chr2	complement(35374016..35374526)	0.281791	1.39609	2.63188	0.158767	0.999995	1
Medtr2g084375	chr2	complement(35541196..35543387)	0.0198854	1.90438	3.74347	0.468379	0.999995	1
Medtr2g086277	chr2	36287028..36288138	0.077821	1.90447	3.74371	0.468355	0.999995	1
Medtr2g086590	chr2	36411320..36412314	0.0158884	1.90438	3.74347	0.468379	0.999995	1
Medtr2g086900	chr2	complement(36519948..36520769)	0.0234442	1.90447	3.74371	0.468355	0.999995	1
Medtr2g087370	chr2	36754012..36756275	0.0543262	1.90438	3.74347	0.468379	0.999995	1
Medtr2g088060	chr2	complement(37073996..37075325)	0.0480549	2.69868	6.49206	0.280395	0.999995	1
Medtr2g088103	chr2	37097562..37100433	0.0329352	1.90438	3.74347	0.468379	0.999995	1
Medtr2g088110	chr2	complement(37105907..37106377)	0.0411411	1.90447	3.74371	0.468355	0.999995	1
Medtr2g088170	chr2	37135155..37138193	0.0140416	1.90447	3.74371	0.468355	0.999995	1
Medtr2g088200	chr2	complement(37152492..37155867)	0.0150132	1.90438	3.74347	0.468379	0.999995	1
Medtr2g088760	chr2	complement(37423998..37424756)	0.0255302	1.90447	3.74371	0.468355	0.999995	1
Medtr2g089130	chr2	37623978..37628212	0.0206596	2.69868	6.49206	0.280395	0.999995	1
Medtr2g089600	chr2	37874844..37875070	0.172775	2.69859	6.49165	0.280413	0.999995	1
Medtr2g089960	chr2	38042662..38043342	3.67878	1.67185	3.18622	0.200491	0.999995	1
Medtr2g090185	chr2	complement(38267982..38268362)	0.133846	1.36892	2.58276	0.347473	0.999995	1
Medtr2g090425	chr2	38561453..38566915	0.0196925	1.90447	3.74371	0.468355	0.999995	1
Medtr2g090640	chr2	38791614..38794576	0.0236817	2.69877	6.49247	0.280376	0.999995	1
Medtr2g090820	chr2	complement(38953941..38954723)	0.0449593	1.90447	3.74371	0.468355	0.999995	1
Medtr2g090980	chr2	39097913..39100964	0.0347228	3.2476	9.49786	0.197985	0.999995	1
Medtr2g091155	chr2	39288531..39290450	0.113453	1.29072	2.44649	0.158813	0.999995	1
Medtr2g091245	chr2	complement(39379180..39382785)	0.0089297	1.90447	3.74371	0.468355	0.999995	1
Medtr2g091325	chr2	39457119..39460043	0.0209251	2.69877	6.49247	0.280376	0.999995	1
Medtr2g093310	chr2	39790195..39792818	0.0913966	3.20801	9.24078	0.189877	0.999995	1
Medtr2g093520	chr2	39881280..39882898	0.0266907	1.90447	3.74371	0.468355	0.999995	1
Medtr2g094880	chr2	40518648..40519284	0.0365947	1.90438	3.74347	0.468379	0.999995	1
Medtr2g095020	chr2	40566887..40567434	0.37995	1.39558	2.63095	0.380869	0.999995	1
Medtr2g095340	chr2	40727951..40728513	0.0598822	1.90438	3.74347	0.468379	0.999995	1
Medtr2g096190	chr2	complement(41064795..41067331)	0.0215207	2.69868	6.49206	0.280395	0.999995	1
Medtr2g096350	chr2	complement(41158181..41158840)	0.0877573	3.20811	9.24137	0.189863	0.999995	1
Medtr2g097460	chr2	41617834..41618687	0.0255925	1.90447	3.74371	0.468355	0.999995	1
Medtr2g098200	chr2	41971870..41973222	0.122452	1.36911	2.58311	0.360452	0.999995	1
Medtr2g098315	chr2	42027870..42028437	0.0973292	1.90447	3.74371	0.468355	0.999995	1
Medtr2g098400	chr2	complement(42061398..42062257)	0.0497963	1.90447	3.74371	0.468355	0.999995	1
Medtr2g098610	chr2	42206507..42208069	0.0325585	3.20792	9.2402	0.189891	0.999995	1
Medtr2g098790	chr2	42287282..42292670	0.0124491	1.90447	3.74371	0.468355	0.999995	1
Medtr2g099075	chr2	complement(42448808..42450745)	0.0377391	1.36907	2.58304	0.347421	0.999995	1
Medtr2g100520	chr2	complement(43210621..43213715)	0.0144177	1.90447	3.74371	0.468355	0.999995	1
Medtr2g101810	chr2	complement(43804635..43805111)	0.121648	3.20811	9.24137	0.190158	0.999995	1
Medtr2g101910	chr2	complement(43850044..43851236)	0.144937	3.20801	9.24078	0.189877	0.999995	1
Medtr2g101970	chr2	complement(43875107..43875370)	0.132879	2.69868	6.49206	0.280395	0.999995	1
Medtr2g103400	chr2	complement(44517076..44519115)	0.0121892	1.90447	3.74371	0.468355	0.999995	1
Medtr2g103610	chr2	complement(44612065..44612256)	0.201295	2.69877	6.49247	0.280376	0.999995	1
Medtr2g103620	chr2	44614214..44615760	0.0927206	1.50655	2.84131	0.205383	0.999995	1
Medtr2g103680	chr2	complement(44636580..44636963)	0.100371	2.70204	6.5072	0.279717	0.999995	1
Medtr2g104210	chr2	complement(44904934..44905149)	0.267655	3.2476	9.49786	0.197971	0.999995	1
Medtr2g104280	chr2	complement(44918290..44919510)	0.0922112	1.00178	2.00247	0.358129	0.999995	1
Medtr2g104650	chr2	45038906..45041048	0.0160593	1.90447	3.74371	0.468355	0.999995	1
Medtr2g104630	chr2	complement(45047734..45048406)	0.118958	1.90447	3.74371	0.468355	0.999995	1
Medtr2g104860	chr2	complement(45195844..45200877)	0.0384954	1.00183	2.00254	0.326002	0.999995	1
Medtr2g105300	chr2	complement(45395805..45397016)	0.016816	1.90447	3.74371	0.468355	0.999995	1
Medtr3g005320	chr3	complement(152155..154612)	0.0273038	2.69859	6.49165	0.280413	0.999995	1
Medtr3g005490	chr3	complement(221449..223656)	0.0198107	1.90438	3.74347	0.468379	0.999995	1
Medtr3g005495	chr3	complement(224414..227585)	0.0221879	2.69859	6.49165	0.280413	0.999995	1
Medtr3g005610	chr3	289791..290720	0.0169988	1.90438	3.74347	0.468379	0.999995	1
Medtr3g005650	chr3	300803..303906	0.0147197	1.90438	3.74347	0.468379	0.999995	1
Medtr3g005890	chr3	429035..430098	0.142933	3.20801	9.24078	0.189877	0.999995	1
Medtr3g006640	chr3	complement(792668..793555)	0.0218214	1.90447	3.74371	0.468355	0.999995	1
Medtr3g007270	chr3	955412..956650	0.0410726	3.20792	9.2402	0.189891	0.999995	1
Medtr3g007390	chr3	1007086..1007706	0.0932686	3.20811	9.24137	0.189863	0.999995	1
Medtr3g007730	chr3	1150300..1154618	0.0132175	1.90447	3.74371	0.468355	0.999995	1
Medtr3g007840	chr3	1210347..1211656	0.0127286	1.90438	3.74347	0.468379	0.999995	1
Medtr3g007900	chr3	complement(1234999..1236356)	0.0833438	2.70192	6.50668	0.280844	0.999995	1
Medtr3g008140	chr3	complement(1335919..1338881)	0.0166235	1.90438	3.74347	0.468379	0.999995	1
Medtr3g008530	chr3	1569741..1574987	0.00832486	1.90438	3.74347	0.468379	0.999995	1
Medtr3g008780	chr3	complement(1654527..1656300)	0.0386971	1.90447	3.74371	0.468355	0.999995	1
Medtr3g009300	chr3	complement(1936768..1937913)	0.0181437	1.90447	3.74371	0.468355	0.999995	1
Medtr3g009370	chr3	2000440..2004326	0.00580858	1.90447	3.74371	0.468355	0.999995	1
Medtr3g009450	chr3	complement(2041643..2043382)	0.0541351	3.20792	9.24019	0.189891	0.999995	1
Medtr3g009760	chr3	2151533..2153673	0.010372	1.90447	3.74371	0.468355	0.999995	1
Medtr3g010650	chr3	2517864..2524038	0.00600871	1.90438	3.74347	0.468379	0.999995	1
Medtr3g011065	chr3	2688309..2688651	0.12665	1.90447	3.74371	0.468355	0.999995	1
Medtr3g011190	chr3	complement(2726008..2727501)	0.0159092	1.90447	3.74371	0.468355	0.999995	1
Medtr3g011250	chr3	2744032..2744202	0.113318	1.90447	3.74371	0.468355	0.999995	1
Medtr3g011670	chr3	complement(2932832..2937096)	0.0706553	2.69868	6.49206	0.280395	0.999995	1
Medtr3g011720	chr3	2967769..2968342	0.0693373	1.90438	3.74347	0.468379	0.999995	1
Medtr3g011930	chr3	3119452..3123555	0.0452354	1.74468	3.35121	0.21515	0.999995	1
Medtr3g012130	chr3	3257228..3259560	0.00939888	1.90438	3.74347	0.468379	0.999995	1
Medtr3g014390	chr3	complement(4088308..4093243)	0.0133705	1.36901	2.58293	0.352101	0.999995	1
Medtr3g014760	chr3	4265775..4267552	0.0559159	1.36892	2.58278	0.347471	0.999995	1
Medtr3g014770	chr3	complement(4269911..4270279)	0.0566628	1.90438	3.74347	0.468379	0.999995	1
Medtr3g014790	chr3	4278224..4283145	0.0322998	1.36902	2.58294	0.347434	0.999995	1
Medtr3g415670	chr3	complement(4571410..4572174)	0.0206652	1.90438	3.74347	0.468379	0.999995	1
Medtr3g016255	chr3	4841216..4841834	0.0930975	1.90447	3.74371	0.468355	0.999995	1
Medtr3g018660	chr3	complement(5128735..5129005)	0.0994271	1.90438	3.74347	0.468379	0.999995	1
Medtr3g018710	chr3	complement(5142151..5143563)	0.177827	1.45016	2.73238	0.165799	0.999995	1
Medtr3g018925	chr3	5243588..5246433	0.0587195	1.90447	3.74371	0.468355	0.999995	1
Medtr3g019240	chr3	5374075..5375374	0.0161807	1.90447	3.74371	0.468355	0.999995	1
Medtr3g020330	chr3	5853016..5856390	0.0083885	1.90447	3.74371	0.468355	0.999995	1
Medtr3g020500	chr3	complement(5920914..5921648)	0.0693813	3.20792	9.24019	0.189891	0.999995	1
Medtr3g020990	chr3	complement(6092754..6097663)	0.0264719	1.90447	3.74371	0.468355	0.999995	1
Medtr3g021215	chr3	complement(6180929..6181249)	0.0603659	1.90447	3.74371	0.468355	0.999995	1
Medtr3g023280	chr3	complement(7035165..7035619)	0.213471	1.21632	2.32354	0.351896	0.999995	1
Medtr3g023330	chr3	complement(7057776..7058971)	0.0359841	2.70192	6.50668	0.280747	0.999995	1
Medtr3g023410	chr3	complement(7094310..7095737)	0.0517796	3.58463	11.9972	0.146481	0.999995	1
Medtr3g024480	chr3	7600323..7600971	0.0454279	1.90438	3.74347	0.468379	0.999995	1
Medtr3g024510	chr3	7612239..7617360	0.0310325	2.70204	6.5072	0.279717	0.999995	1
Medtr3g025330	chr3	complement(7733410..7740950)	0.0108618	1.90447	3.74371	0.468355	0.999995	1
Medtr3g025425	chr3	complement(7771862..7772279)	0.100924	1.90447	3.74371	0.468355	0.999995	1
Medtr3g026220	chr3	8065073..8065943	0.105307	1.90447	3.74371	0.468355	0.999995	1
Medtr3g027045	chr3	complement(8359553..8360681)	0.236641	1.25969	2.39445	0.288892	0.999995	1
Medtr3g027170	chr3	8434719..8435093	0.0513898	1.90447	3.74371	0.468355	0.999995	1
Medtr3g028060	chr3	complement(8869310..8870399)	0.01768	1.90447	3.74371	0.468355	0.999995	1
Medtr3g029550	chr3	complement(9293412..9294056)	0.0600851	2.70192	6.50668	0.280651	0.999995	1
Medtr3g029610	chr3	complement(9324326..9324923)	0.0411411	1.90447	3.74371	0.468355	0.999995	1
Medtr3g032800	chr3	complement(10372801..10376544)	0.0051756	1.90447	3.74371	0.468355	0.999995	1
Medtr3g033390	chr3	10671713..10672695	0.0301583	1.90447	3.74371	0.468355	0.999995	1
Medtr3g034650	chr3	complement(11242382..11246121)	0.00676462	1.90438	3.74347	0.468379	0.999995	1
Medtr3g435760	chr3	11786657..11787348	0.0879962	2.70204	6.5072	0.279717	0.999995	1
Medtr3g436170	chr3	complement(12142952..12143215)	0.0729969	1.90447	3.74371	0.468355	0.999995	1
Medtr3g438040	chr3	complement(13007156..13007502)	1.03337	1.05188	2.07323	0.180029	0.999995	1
Medtr3g035815	chr3	13275409..13275780	0.0518042	1.90447	3.74371	0.468355	0.999995	1
Medtr3g036040	chr3	complement(13394343..13395064)	0.0327307	1.90438	3.74347	0.468379	0.999995	1
Medtr3g036420	chr3	complement(13523339..13523725)	0.0497963	1.90447	3.74371	0.468355	0.999995	1
Medtr3g037500	chr3	complement(13781841..13783344)	0.0221964	1.90447	3.74371	0.468355	0.999995	1
Medtr3g044820	chr3	14461348..14462680	0.0745703	3.15882	8.93101	0.207143	0.999995	1
Medtr3g047220	chr3	15698000..15699444	0.0148012	1.90447	3.74371	0.468355	0.999995	1
Medtr3g448600	chr3	complement(16346231..16346650)	0.0376403	1.90438	3.74347	0.468379	0.999995	1
Medtr3g449450	chr3	16845180..16846494	0.0824572	1.90447	3.74371	0.468355	0.999995	1
Medtr3g450490	chr3	complement(17373681..17375567)	0.032663	1.90447	3.74371	0.468355	0.999995	1
Medtr3g450650	chr3	complement(17460467..17461682)	0.0357847	2.70192	6.50668	0.280547	0.999995	1
Medtr3g450720	chr3	complement(17509203..17512034)	0.0389317	2.70204	6.5072	0.279717	0.999995	1
Medtr3g450990	chr3	17663346..17664740	0.0225057	1.90447	3.74371	0.468355	0.999995	1
Medtr3g451220	chr3	complement(17777698..17779971)	0.0112529	1.90447	3.74371	0.468355	0.999995	1
Medtr3g048870	chr3	complement(18149252..18150002)	0.0623663	1.90447	3.74371	0.468355	0.999995	1
Medtr3g049113	chr3	complement(18294269..18295948)	0.0324784	3.20801	9.24078	0.189877	0.999995	1
Medtr3g452130	chr3	complement(18967286..18970184)	0.0228123	1.90438	3.74347	0.468379	0.999995	1
Medtr3g452940	chr3	complement(19451838..19453575)	0.0861219	1.90447	3.74371	0.468355	0.999995	1
Medtr3g453030	chr3	complement(19482256..19484422)	0.0152338	1.90447	3.74371	0.468355	0.999995	1
Medtr3g049795	chr3	19609635..19610084	0.176478	2.69877	6.49247	0.280376	0.999995	1
Medtr3g453170	chr3	20323348..20323875	0.0401189	1.90447	3.74371	0.468355	0.999995	1
Medtr3g052430	chr3	complement(20730678..20733390)	0.0119179	1.90447	3.74371	0.468355	0.999995	1
Medtr3g052610	chr3	20814127..20817509	0.00735983	1.90438	3.74347	0.468379	0.999995	1
Medtr3g052930	chr3	20976312..20978271	0.019525	1.90447	3.74371	0.468355	0.999995	1
Medtr3g053370	chr3	21222875..21223964	0.284526	1.50624	2.84069	0.226514	0.999995	1
Medtr3g053390	chr3	complement(21227281..21227706)	0.0371101	1.90438	3.74347	0.468379	0.999995	1
Medtr3g053420	chr3	21230819..21231067	0.0634896	1.90438	3.74347	0.468379	0.999995	1
Medtr3g053440	chr3	complement(21233614..21234193)	0.105539	1.36907	2.58304	0.348062	0.999995	1
Medtr3g456010	chr3	22095001..22099038	0.0192327	1.90447	3.74371	0.468355	0.999995	1
Medtr3g456030	chr3	22104178..22107184	0.00671938	1.90447	3.74371	0.468355	0.999995	1
Medtr3g055830	chr3	22178881..22181628	0.00705147	1.90447	3.74371	0.468355	0.999995	1
Medtr3g056180	chr3	complement(22352083..22353551)	0.0602249	1.36902	2.58294	0.350597	0.999995	1
Medtr3g057160	chr3	complement(22835661..22838931)	0.0306121	1.90447	3.74371	0.468355	0.999995	1
Medtr3g058900	chr3	complement(23518033..23518407)	0.0516732	1.90447	3.74371	0.468355	0.999995	1
Medtr3g058930	chr3	23529882..23531712	0.0906661	1.21246	2.31732	0.218897	0.999995	1
Medtr3g060410	chr3	23691060..23693543	0.0145169	1.90438	3.74347	0.468379	0.999995	1
Medtr3g060680	chr3	23797868..23800123	0.0892184	1.90447	3.74371	0.468355	0.999995	1
Medtr3g060950	chr3	24203154..24205009	0.117652	1.74481	3.3515	0.233214	0.999995	1
Medtr3g061310	chr3	24351032..24352721	0.0224606	1.90447	3.74371	0.468355	0.999995	1
Medtr3g061320	chr3	24354366..24356126	0.0229419	1.90447	3.74371	0.468355	0.999995	1
Medtr3g461450	chr3	complement(24415846..24416382)	0.0382365	1.90447	3.74371	0.468355	0.999995	1
Medtr3g061780	chr3	complement(24641663..24642103)	0.0436988	1.90447	3.74371	0.468355	0.999995	1
Medtr3g061800	chr3	complement(24656232..24656633)	0.0592582	1.90447	3.74371	0.468355	0.999995	1
Medtr3g462500	chr3	complement(24976175..24977127)	0.0226372	1.90447	3.74371	0.468355	0.999995	1
Medtr3g462530	chr3	24990527..24991932	0.0166235	1.90438	3.74347	0.468379	0.999995	1
Medtr3g463010	chr3	complement(25228893..25230974)	0.0257337	1.90447	3.74371	0.468355	0.999995	1
Medtr3g463020	chr3	complement(25233620..25234030)	0.0384645	1.90438	3.74347	0.468379	0.999995	1
Medtr3g463140	chr3	25275065..25275576	0.0513898	1.90447	3.74371	0.468355	0.999995	1
Medtr3g463200	chr3	complement(25299775..25302140)	0.0271043	1.90447	3.74371	0.468355	0.999995	1
Medtr3g463590	chr3	complement(25494699..25496004)	0.0780124	1.50622	2.84065	0.194949	0.999995	1
Medtr3g463690	chr3	complement(25529259..25531301)	0.0421571	1.90438	3.74347	0.468379	0.999995	1
Medtr3g463740	chr3	complement(25547763..25548008)	0.900426	1.04528	2.06376	0.19227	0.999995	1
Medtr3g463920	chr3	25649684..25653834	0.0332033	2.69877	6.49247	0.280376	0.999995	1
Medtr3g464920	chr3	complement(26203835..26214624)	0.00737511	2.70204	6.5072	0.279717	0.999995	1
Medtr3g465060	chr3	26302409..26303929	0.0183498	1.90447	3.74371	0.468355	0.999995	1
Medtr3g465580	chr3	26549668..26553498	0.0128319	1.90438	3.74347	0.468379	0.999995	1
Medtr3g031640	chr3	complement(26674996..26677398)	0.0161277	2.70192	6.50668	0.280406	0.999995	1
Medtr3g031590	chr3	26695559..26696179	0.0621072	1.90447	3.74371	0.468355	0.999995	1
Medtr3g031490	chr3	complement(26736617..26738983)	0.0244248	1.39566	2.63109	0.382213	0.999995	1
Medtr3g465870	chr3	complement(27040910..27042870)	0.0150213	1.90447	3.74371	0.468355	0.999995	1
Medtr3g465900	chr3	complement(27057577..27060402)	0.0241726	1.90438	3.74347	0.468379	0.999995	1
Medtr3g467190	chr3	complement(27694963..27695285)	0.048944	1.90438	3.74347	0.468379	0.999995	1
Medtr3g467340	chr3	27771113..27774205	0.00623058	1.90447	3.74371	0.468355	0.999995	1
Medtr3g467370	chr3	27789366..27790372	0.090311	1.36901	2.58293	0.347436	0.999995	1
Medtr3g062030	chr3	complement(27963928..27965525)	0.0446579	2.69859	6.49165	0.280413	0.999995	1
Medtr3g062130	chr3	28035633..28038431	0.0577738	1.74477	3.35142	0.215777	0.999995	1
Medtr3g062680	chr3	complement(28325336..28325569)	0.150369	2.69868	6.49206	0.280395	0.999995	1
Medtr3g062865	chr3	complement(28419496..28420077)	0.033073	1.90438	3.74347	0.468379	0.999995	1
Medtr3g063320	chr3	complement(28680436..28681368)	0.121417	1.36892	2.58276	0.347473	0.999995	1
Medtr3g063340	chr3	complement(28692341..28692864)	0.495083	1.04494	2.06328	0.191241	0.999995	1
Medtr3g064130	chr3	28839329..28839715	0.0995926	2.70204	6.5072	0.279717	0.999995	1
Medtr3g064310	chr3	complement(28941390..28945240)	0.0580309	2.69877	6.49247	0.280376	0.999995	1
Medtr3g064500	chr3	29064791..29066449	0.0480181	3.20792	9.24019	0.189891	0.999995	1
Medtr3g065180	chr3	29404315..29405648	0.0154535	1.90438	3.74347	0.468379	0.999995	1
Medtr3g065200	chr3	29412981..29415191	0.027885	2.69877	6.49247	0.280376	0.999995	1
Medtr3g065410	chr3	29552599..29554506	0.020292	2.69868	6.49206	0.280395	0.999995	1
Medtr3g067555	chr3	complement(30145189..30147034)	0.0539762	2.70192	6.50668	0.28028	0.999995	1
Medtr3g067580	chr3	complement(30172966..30174052)	0.0294216	1.90447	3.74371	0.468355	0.999995	1
Medtr3g067765	chr3	30401010..30402678	0.117988	1.50633	2.84087	0.204422	0.999995	1
Medtr3g067830	chr3	30458799..30459827	0.0587195	1.90447	3.74371	0.468355	0.999995	1
Medtr3g069230	chr3	30995806..30996090	0.102526	1.90447	3.74371	0.468355	0.999995	1
Medtr3g069345	chr3	complement(31033759..31034551)	0.0345409	1.90447	3.74371	0.468355	0.999995	1
Medtr3g069440	chr3	complement(31063183..31069074)	0.030655	3.20801	9.24078	0.189877	0.999995	1
Medtr3g069460	chr3	31071708..31072232	0.036707	1.90447	3.74371	0.468355	0.999995	1
Medtr3g069510	chr3	complement(31088261..31090285)	0.0889705	1.36911	2.58311	0.360252	0.999995	1
Medtr3g070650	chr3	complement(31682447..31685563)	0.0104143	1.90438	3.74347	0.468379	0.999995	1
Medtr3g071670	chr3	complement(32190068..32190412)	0.0655971	1.90438	3.74347	0.468379	0.999995	1
Medtr3g071790	chr3	complement(32224415..32225482)	0.0259588	1.90438	3.74347	0.468379	0.999995	1
Medtr3g071860	chr3	complement(32248878..32254412)	0.00415587	1.90438	3.74347	0.468379	0.999995	1
Medtr3g072910	chr3	complement(32818650..32818896)	0.1629	2.69868	6.49206	0.280395	0.999995	1
Medtr3g072940	chr3	complement(32831930..32833393)	0.0479236	1.74462	3.35108	0.224543	0.999995	1
Medtr3g073340	chr3	33069362..33071153	0.0458837	1.90447	3.74371	0.468355	0.999995	1
Medtr3g073390	chr3	33092483..33094274	0.0520561	2.01991	4.05559	0.173599	0.999995	1
Medtr3g073950	chr3	complement(33373568..33374228)	0.0525134	1.90447	3.74371	0.468355	0.999995	1
Medtr3g074270	chr3	33561643..33563808	0.0109102	1.90438	3.74347	0.468379	0.999995	1
Medtr3g074340	chr3	33595325..33596573	0.0154535	1.90438	3.74347	0.468379	0.999995	1
Medtr3g074370	chr3	33602456..33603704	0.0188379	1.90447	3.74371	0.468355	0.999995	1
Medtr3g074960	chr3	33865490..33870907	0.0141648	1.90447	3.74371	0.468355	0.999995	1
Medtr3g088920	chr3	34007386..34007649	0.132879	2.69868	6.49206	0.280395	0.999995	1
Medtr3g075060	chr3	complement(34084766..34086573)	0.0253348	1.90438	3.74347	0.468379	0.999995	1
Medtr3g075140	chr3	complement(34144189..34145228)	0.0255586	1.90447	3.74371	0.468355	0.999995	1
Medtr3g075230	chr3	complement(34237032..34240288)	0.108005	1.79434	3.46856	0.190285	0.999995	1
Medtr3g075520	chr3	complement(34388503..34390038)	0.0125463	1.90447	3.74371	0.468355	0.999995	1
Medtr3g077220	chr3	34665205..34666014	0.0609353	1.90447	3.74371	0.468355	0.999995	1
Medtr3g077520	chr3	complement(34824529..34825020)	0.0751064	1.90447	3.74371	0.468355	0.999995	1
Medtr3g078460	chr3	35353535..35354381	0.0537718	1.90438	3.74347	0.468379	0.999995	1
Medtr3g079420	chr3	35705582..35709331	0.0610446	1.18614	2.27543	0.20475	0.999995	1
Medtr3g079610	chr3	35932023..35932664	0.175341	1.25976	2.39455	0.27697	0.999995	1
Medtr3g079670	chr3	35955140..35957326	0.0172218	1.90447	3.74371	0.468355	0.999995	1
Medtr3g079790	chr3	complement(36021629..36028458)	0.00551393	1.90447	3.74371	0.468355	0.999995	1
Medtr3g080245	chr3	36298776..36299446	0.0287201	1.90447	3.74371	0.468355	0.999995	1
Medtr3g080360	chr3	complement(36335849..36336952)	0.0618141	3.20811	9.24137	0.189863	0.999995	1
Medtr3g080490	chr3	complement(36413839..36416634)	0.00689241	1.90447	3.74371	0.468355	0.999995	1
Medtr3g080580	chr3	36463292..36465022	0.0111944	1.90447	3.74371	0.468355	0.999995	1
Medtr3g080700	chr3	complement(36528510..36528695)	0.20836	2.70192	6.50668	0.280183	0.999995	1
Medtr3g080840	chr3	complement(36585417..36588592)	0.0147747	1.90438	3.74347	0.468379	0.999995	1
Medtr3g082380	chr3	complement(37179349..37181281)	0.0468885	1.90447	3.74371	0.468355	0.999995	1
Medtr3g082920	chr3	complement(37423361..37427948)	0.012142	1.90438	3.74347	0.468379	0.999995	1
Medtr3g083153	chr3	complement(37516560..37517820)	0.0944665	1.90447	3.74371	0.468355	0.999995	1
Medtr3g083285	chr3	37583932..37584129	0.0973292	1.90447	3.74371	0.468355	0.999995	1
Medtr3g083295	chr3	37585068..37585265	0.0978659	1.90447	3.74371	0.468355	0.999995	1
Medtr3g083390	chr3	complement(37633555..37635379)	0.00866242	1.90438	3.74347	0.468379	0.999995	1
Medtr3g083660	chr3	complement(37757509..37758633)	0.0226987	1.90447	3.74371	0.468355	0.999995	1
Medtr3g083720	chr3	37778445..37780057	0.10536	3.20792	9.2402	0.189891	0.999995	1
Medtr3g084150	chr3	complement(38024255..38025324)	0.0295494	2.69859	6.49165	0.280413	0.999995	1
Medtr3g084690	chr3	38248707..38249864	0.0136519	1.90438	3.74347	0.468379	0.999995	1
Medtr3g085155	chr3	complement(38469821..38470028)	0.119614	1.90447	3.74371	0.468355	0.999995	1
Medtr3g085200	chr3	complement(38508471..38510118)	0.525509	1.0191	2.02666	0.2664	0.999995	1
Medtr3g085885	chr3	38858635..38859260	0.0669138	1.90447	3.74371	0.468355	0.999995	1
Medtr3g086050	chr3	38935304..38936374	0.0179936	1.90447	3.74371	0.468355	0.999995	1
Medtr3g086730	chr3	complement(39296677..39297384)	0.158725	1.50643	2.84105	0.203839	0.999995	1
Medtr3g086880	chr3	complement(39383882..39386768)	0.0379485	3.20792	9.2402	0.189891	0.999995	1
Medtr3g087480	chr3	39659179..39661582	0.145915	1.05177	2.07308	0.153681	0.999995	1
Medtr3g088040	chr3	complement(39910676..39912770)	0.15753	1.62959	3.09426	0.186332	0.999995	1
Medtr3g088475	chr3	40207561..40209493	0.0133549	1.90447	3.74371	0.468355	0.999995	1
Medtr3g088485	chr3	40220146..40220726	0.0316812	1.90438	3.74347	0.468379	0.999995	1
Medtr3g088780	chr3	40595414..40598668	0.00836677	1.90447	3.74371	0.468355	0.999995	1
Medtr3g088785	chr3	40600064..40602677	0.00895917	1.90447	3.74371	0.468355	0.999995	1
Medtr3g090940	chr3	41296423..41298378	0.116117	1.39609	2.63186	0.150661	0.999995	1
Medtr3g090990	chr3	41335229..41339656	0.0152059	2.69868	6.49206	0.280395	0.999995	1
Medtr3g091000	chr3	complement(41339959..41340240)	0.05606	1.90438	3.74347	0.468379	0.999995	1
Medtr3g091230	chr3	41471934..41472912	0.0366997	1.90447	3.74371	0.468355	0.999995	1
Medtr3g091605	chr3	complement(41697356..41697535)	0.107652	1.90447	3.74371	0.468355	0.999995	1
Medtr3g091700	chr3	complement(41744642..41746533)	0.0201131	1.90438	3.74347	0.468379	0.999995	1
Medtr3g091890	chr3	41931954..41933359	0.0483453	1.90438	3.74347	0.468379	0.999995	1
Medtr3g092175	chr3	complement(42102428..42106279)	0.0814499	2.69868	6.49206	0.280395	0.999995	1
Medtr3g093160	chr3	complement(42582245..42583109)	0.0255925	1.90447	3.74371	0.468355	0.999995	1
Medtr3g093180	chr3	42593782..42594530	0.0278817	1.90438	3.74347	0.468379	0.999995	1
Medtr3g093290	chr3	complement(42637085..42639371)	0.0712165	1.29409	2.45222	0.340605	0.999995	1
Medtr3g093460	chr3	42710590..42711042	0.0659097	1.90447	3.74371	0.468355	0.999995	1
Medtr3g093770	chr3	42842770..42844377	0.0360198	1.3691	2.58309	0.358672	0.999995	1
Medtr3g094030	chr3	complement(42955452..42955722)	0.330789	1.25966	2.3944	0.270995	0.999995	1
Medtr3g096270	chr3	43996689..43999378	0.0181712	1.90438	3.74347	0.468379	0.999995	1
Medtr3g096290	chr3	complement(44004783..44005965)	0.0237178	1.90447	3.74371	0.468355	0.999995	1
Medtr3g097000	chr3	complement(44430691..44431902)	0.0159003	1.90447	3.74371	0.468355	0.999995	1
Medtr3g098470	chr3	44965001..44966987	0.0197527	1.90447	3.74371	0.468355	0.999995	1
Medtr3g498715	chr3	complement(45105783..45108633)	0.00808404	1.90447	3.74371	0.468355	0.999995	1
Medtr3g099750	chr3	45728970..45733838	0.145426	1.03627	2.05092	0.246881	0.999995	1
Medtr3g100190	chr3	complement(46039277..46042395)	0.00668442	1.90447	3.74371	0.468355	0.999995	1
Medtr3g100550	chr3	complement(46244690..46246113)	0.0432203	1.36902	2.58294	0.347434	0.999995	1
Medtr3g102030	chr3	complement(47001012..47002157)	0.0565499	3.20801	9.24078	0.189877	0.999995	1
Medtr3g102140	chr3	47057331..47059846	0.0109556	1.90438	3.74347	0.468379	0.999995	1
Medtr3g103030	chr3	47454820..47457040	0.112939	1.30676	2.47386	0.191796	0.999995	1
Medtr3g103160	chr3	47549686..47551256	0.0118419	1.90438	3.74347	0.468379	0.999995	1
Medtr3g104000	chr3	complement(47918211..47921997)	0.0153678	1.90447	3.74371	0.468355	0.999995	1
[truncated: 1,286 more rows]

## Sheet: FRD 0.05 and less
Name	Chromosome	Region	Max group mean	Log₂ fold change	Fold change	P-value	FDR p-value	Bonferroni
MTR_1g009270	chr1	1253486..1256331	5.91361	2.86094	7.2649	0	0	0
MTR_1g017910	chr1	complement(5105397..5107858)	11.8901	3.68453	12.8574	0	0	0
MTR_1g028600	chr1	complement(9698155..9700150)	240.306	9.85185	924.062	0	0	0
MTR_1g030660	chr1	10679998..10681898	21.5013	7.04338	131.907	0	0	0
MTR_1g036410	chr1	complement(13347344..13350444)	70.0629	10.1301	1120.63	0	0	0
MTR_1g040500	chr1	18617585..18620810	66.6615	6.59305	96.5398	0	0	0
MTR_1g050525	chr1	19535521..19546370	5.51256	3.6216	12.3086	0	0	0
MTR_1g050550	chr1	complement(19712167..19714149)	6.74574	2.15576	4.45604	0	0	0
MTR_1g062590	chr1	complement(27388450..27390478)	107.667	-1.37226	-2.58876	0	0	0
MTR_1g069725	chr1	complement(30383115..30384606)	7.6981	3.532	11.5674	0	0	0
MTR_1g471050	chr1	31456119..31465321	46.0304	2.84395	7.17985	0	0	0
MTR_1g075550	chr1	complement(33461452..33462419)	21.3828	4.80583	27.9704	0	0	0
MTR_1g076830	chr1	34296146..34297881	12.6385	8.20235	294.546	0	0	0
MTR_1g079120	chr1	complement(35169860..35172293)	7.13455	6.62136	98.453	0	0	0
MTR_1g080820	chr1	complement(35952385..35953845)	39.4419	2.69563	6.47837	0	0	0
MTR_1g081625	chr1	36286105..36289258	33.1701	8.22856	299.946	0	0	0
MTR_1g081640	chr1	36291162..36294871	10.2398	6.1116	69.1474	0	0	0
MTR_1g086550	chr1	complement(38725663..38728964)	20.2202	1.97936	3.94318	0	0	0
MTR_1g090707	chr1	complement(40695752..40698515)	20.4013	8.19003	292.041	0	0	0
MTR_1g090737	chr1	40755090..40757757	20.0428	8.84311	459.243	0	0	0
MTR_1g098300	chr1	44246833..44250756	5.77939	3.52046	11.4753	0	0	0
MTR_1g101370	chr1	complement(45784401..45787692)	3.13028	5.21104	37.0406	0	0	0
MTR_1g109110	chr1	49299945..49302477	30.1777	7.40534	169.524	0	0	0
MTR_2g008470	chr2	1491577..1496418	19.1141	1.64101	3.11884	0	0	0
MTR_2g008740	chr2	1594358..1596027	11.2821	8.45733	351.488	0	0	0
MTR_2g012790	chr2	complement(3291925..3293201)	28.0068	2.95126	7.73424	0	0	0
MTR_2g016730	chr2	complement(5172338..5173691)	7.57204	5.77009	54.5721	0	0	0
MTR_2g017750	chr2	5457521..5460670	27.9275	7.86493	233.12	0	0	0
MTR_2g023150	chr2	8109366..8111042	11.9779	3.15049	8.8796	0	0	0
MTR_2g030855	chr2	complement(11671573..11672658)	36.9714	7.27859	155.266	0	0	0
MTR_2g031270	chr2	complement(11719359..11720872)	19.2897	4.44183	21.7333	0	0	0
MTR_2g438310	chr2	complement(15449032..15450544)	19.5428	2.25358	4.76865	0	0	0
MTR_2g438320	chr2	complement(15458115..15459893)	16.129	2.1837	4.54316	0	0	0
MTR_2g044100	chr2	complement(19173412..19176099)	38.076	3.82096	14.1326	0	0	0
MTR_2g461970	chr2	complement(25632722..25636216)	52.9374	1.78521	3.44669	0	0	0
MTR_2g062430	chr2	26354832..26357000	5.57035	3.19774	9.17518	0	0	0
MTR_2g062560	chr2	26410129..26414001	5.56619	3.10012	8.57491	0	0	0
MTR_2g070120	chr2	complement(29504938..29505698)	92.541	5.292	39.1788	0	0	0
MTR_2g072260	chr2	30390835..30396174	10.7834	4.87872	29.42	0	0	0
MTR_2g081600	chr2	complement(34243268..34243690)	14.9376	5.66009	50.5659	0	0	0
MTR_2g086620	chr2	36420900..36421618	24.0245	7.86759	233.55	0	0	0
MTR_2g086630	chr2	36424379..36425295	137.199	10.4333	1382.7	0	0	0
MTR_2g089100	chr2	37602592..37604640	6.98008	2.10874	4.31314	0	0	0
MTR_2g089380	chr2	37768309..37769290	13.1133	5.65067	50.2367	0	0	0
MTR_2g091215	chr2	complement(39347443..39348176)	356.266	8.05122	265.251	0	0	0
MTR_2g098490	chr2	complement(42123120..42131459)	17.9568	8.68927	412.791	0	0	0
MTR_2g101920	chr2	43851532..43855716	75.3086	5.23437	37.6447	0	0	0
MTR_2g104800	chr2	45169879..45170681	19.2816	5.40936	42.499	0	0	0
MTR_3g009880	chr3	2195853..2197674	20.1706	8.78106	439.91	0	0	0
MTR_3g011630	chr3	complement(2923472..2926629)	8.45985	3.35856	10.2572	0	0	0
MTR_3g014500	chr3	4123569..4124231	9.72514	3.67534	12.7758	0	0	0
MTR_3g020880	chr3	6055504..6056068	40.7897	3.16821	8.98929	0	0	0
MTR_3g021440	chr3	complement(6281562..6285674)	37.8276	3.23557	9.41896	0	0	0
MTR_3g022830	chr3	complement(6858778..6862026)	14.8934	5.19781	36.7027	0	0	0
MTR_3g045440	chr3	complement(14781798..14783516)	8.32174	6.06192	66.8066	0	0	0
MTR_3g057910	chr3	complement(22918706..22920775)	15.4711	2.47393	5.55554	0	0	0
MTR_3g057980	chr3	22939282..22941877	9.3125	4.76872	27.2602	0	0	0
MTR_3g058060	chr3	complement(22971128..22973864)	13.4283	1.99224	3.97854	0	0	0
MTR_3g058390	chr3	complement(23145718..23147439)	10.6249	5.5423	46.6013	0	0	0
MTR_3g467150	chr3	complement(27678809..27680826)	6.85333	4.0492	16.5551	0	0	0
MTR_3g076630	chr3	34442945..34446106	100.67	1.61101	3.05466	0	0	0
MTR_3g079190	chr3	complement(35616738..35620265)	30.5236	9.29653	628.832	0	0	0
MTR_3g079570	chr3	complement(35913328..35916356)	86.7849	9.8452	919.815	0	0	0
MTR_3g079590	chr3	complement(35919897..35922606)	149.431	5.6233	49.2925	0	0	0
MTR_3g079600	chr3	complement(35926473..35929278)	24.6961	8.95161	495.111	0	0	0
MTR_3g079620	chr3	complement(35933297..35935921)	67.6036	8.5152	365.873	0	0	0
MTR_3g079630	chr3	complement(35938953..35941471)	14.7367	6.33375	80.6582	0	0	0
MTR_3g081140	chr3	complement(36751136..36752470)	84.8925	8.61641	392.461	0	0	0
MTR_3g082200	chr3	complement(37105455..37112701)	11.3604	1.98795	3.96674	0	0	0
MTR_3g083630	chr3	37749162..37751789	70.8061	3.22748	9.36633	0	0	0
MTR_3g086430	chr3	39152403..39158029	7.64102	6.00897	64.399	0	0	0
MTR_3g088965	chr3	complement(40724514..40725497)	46.7902	8.97952	504.783	0	0	0
MTR_3g090540	chr3	41032284..41035035	7.70393	7.37691	166.216	0	0	0
MTR_3g093270	chr3	complement(42630099..42632312)	7.79864	3.44079	10.8588	0	0	0
MTR_3g098650	chr3	complement(45061132..45068920)	5.9512	2.12732	4.36904	0	0	0
MTR_3g104820	chr3	complement(48315579..48317619)	9.10709	4.64596	25.0365	0	0	0
MTR_3g104900	chr3	48354290..48358260	11.1599	5.78063	54.9723	0	0	0
MTR_3g107800	chr3	complement(49733848..49739431)	1.84144	3.57982	11.9573	0	0	0
MTR_3g107810	chr3	complement(49743944..49747415)	598.198	9.83261	911.82	0	0	0
MTR_3g107830	chr3	49753901..49755581	174.605	5.68552	51.465	0	0	0
MTR_3g111900	chr3	52372230..52374345	51.1007	2.69196	6.46192	0	0	0
MTR_3g112460	chr3	52711485..52714657	13.0049	6.30401	79.0124	0	0	0
MTR_3g115940	chr3	54198460..54202630	29.916	1.5359	2.8997	0	0	0
MTR_3g118160	chr3	55299989..55307292	9.72607	5.11671	34.6963	0	0	0
MTR_4g005270	chr4	154297..167405	2.1161	6.2283	74.9731	0	0	0
MTR_4g011120	chr4	2621072..2621719	12.2334	5.01767	32.3944	0	0	0
MTR_4g011800	chr4	complement(2984165..2985715)	22.0799	5.01961	32.438	0	0	0
MTR_4g035250	chr4	complement(12078303..12087672)	7.37192	6.83769	114.38	0	0	0
MTR_4g047610	chr4	complement(16867071..16868445)	14.827	8.88603	473.11	0	0	0
MTR_4g052770	chr4	complement(19144060..19144939)	236.738	9.54293	745.949	0	0	0
MTR_4g052780	chr4	19148105..19148728	86.9515	9.19122	584.566	0	0	0
MTR_4g053630	chr4	19418613..19424375	70.9052	2.72823	6.6264	0	0	0
MTR_4g066130	chr4	complement(24927763..24936093)	10.2659	2.73506	6.65787	0	0	0
MTR_4g075590	chr4	28885867..28887300	8.83674	6.07214	67.2815	0	0	0
MTR_4g076150	chr4	complement(29142393..29143053)	54.492	9.38659	669.337	0	0	0
MTR_4g077180	chr4	29568981..29569791	317.556	10.1915	1169.35	0	0	0
MTR_4g478140	chr4	29990964..29992340	105.36	1.53725	2.90241	0	0	0
MTR_4g079470	chr4	complement(30719276..30720667)	9.84351	6.89257	118.815	0	0	0
MTR_4g079770	chr4	30880789..30882078	13.4087	8.61511	392.109	0	0	0
MTR_4g080730	chr4	complement(31193936..31195577)	3.71569	4.43272	21.5964	0	0	0
MTR_4g081190	chr4	31437802..31442803	46.9546	4.51547	22.8713	0	0	0
MTR_4g084800	chr4	33052678..33054151	32.334	2.65344	6.29165	0	0	0
MTR_4g093845	chr4	37290020..37293626	9.47391	8.8175	451.162	0	0	0
MTR_4g094515	chr4	38124942..38130679	3.08036	3.77856	13.7233	0	0	0
MTR_4g097510	chr4	40182691..40183556	23.4302	8.46586	353.571	0	0	0
MTR_4g097830	chr4	complement(40376868..40379458)	6.24915	5.45498	43.8643	0	0	0
MTR_4g102400	chr4	42444311..42446870	15.3795	3.55499	11.7533	0	0	0
MTR_4g104750	chr4	43395065..43400061	7.117	3.94854	15.4393	0	0	0
MTR_4g105090	chr4	43538822..43541072	7.80132	4.87021	29.247	0	0	0
MTR_4g107930	chr4	complement(44730694..44732137)	11.6271	7.4216	171.444	0	0	0
MTR_4g108170	chr4	44858044..44867506	2.24825	4.76554	27.2001	0	0	0
MTR_4g116640	chr4	complement(48295308..48295565)	40.8122	7.54238	186.415	0	0	0
MTR_4g117950	chr4	complement(48950939..48952363)	12.9029	7.65561	201.636	0	0	0
MTR_4g118000	chr4	complement(48973662..48975250)	13.9521	9.09225	545.808	0	0	0
MTR_4g118840	chr4	49246937..49248284	12.08	7.06347	133.757	0	0	0
MTR_4g129010	chr4	complement(53681519..53683592)	31.762	1.94337	3.84604	0	0	0
MTR_5g010590	chr5	2869609..2871940	42.4149	2.82534	7.08781	0	0	0
MTR_5g011260	chr5	complement(3201249..3203584)	12.9009	8.12344	278.869	0	0	0
MTR_5g011270	chr5	complement(3207276..3209558)	29.7713	10.7065	1671.04	0	0	0
MTR_5g011320	chr5	complement(3225135..3227381)	35.2582	6.04646	66.0945	0	0	0
MTR_5g011340	chr5	complement(3230229..3232644)	34.5492	9.028	522.034	0	0	0
MTR_5g018320	chr5	complement(6821734..6823692)	18.2829	2.77324	6.83644	0	0	0
MTR_5g018610	chr5	6948080..6949174	53.8623	4.65959	25.2741	0	0	0
MTR_5g019460	chr5	complement(7340535..7341789)	33.1459	2.3285	5.02282	0	0	0
MTR_5g020810	chr5	7969752..7973533	8.84801	8.9625	498.863	0	0	0
MTR_5g030910	chr5	13231057..13235148	13.9139	4.07436	16.8463	0	0	0
MTR_5g031030	chr5	13308133..13309153	88.6275	9.70608	835.257	0	0	0
MTR_5g031090	chr5	13333297..13334335	126.272	9.85921	928.794	0	0	0
MTR_5g031100	chr5	13336383..13337441	128.429	9.74155	856.05	0	0	0
MTR_5g031120	chr5	13339729..13340877	47.9642	10.3972	1348.56	0	0	0
MTR_5g031140	chr5	13345509..13346369	48.9342	9.50185	725.004	0	0	0
MTR_5g031160	chr5	13354203..13355702	35.422	9.18794	583.237	0	0	0
MTR_5g033510	chr5	complement(14432472..14434198)	5.40385	5.43215	43.1757	0	0	0
MTR_5g035640	chr5	15508476..15508987	288.266	9.58895	770.124	0	0	0
MTR_5g035650	chr5	15513610..15514041	86.8086	10.6342	1589.37	0	0	0
MTR_5g043550	chr5	complement(19135605..19136489)	15.2981	7.51376	182.754	0	0	0
MTR_5g045470	chr5	complement(19949151..19949959)	124.569	4.33822	20.2271	0	0	0
MTR_5g063620	chr5	complement(26358380..26358923)	103.837	3.19527	9.15949	0	0	0
MTR_5g063930	chr5	complement(26517983..26519938)	24.0942	9.17407	577.658	0	0	0
MTR_5g075400	chr5	complement(32052824..32055351)	14.2744	3.95731	15.5335	0	0	0
MTR_5g075520	chr5	32112561..32114173	135.861	9.45634	702.492	0	0	0
MTR_5g076900	chr5	complement(32800849..32802657)	376.99	9.49807	723.108	0	0	0
MTR_5g092150	chr5	complement(40242651..40245124)	18.8743	1.65917	3.15835	0	0	0
MTR_6g004000	chr6	complement(58842..60515)	15.6232	3.41519	10.6678	0	0	0
MTR_6g005630	chr6	863153..867302	5.02024	3.55352	11.7413	0	0	0
MTR_6g011490	chr6	complement(3269777..3271820)	18.8929	6.64108	99.8078	0	0	0
MTR_6g012970	chr6	4038451..4039828	38.4121	2.90172	7.47316	0	0	0
MTR_6g012980	chr6	complement(4042934..4048518)	3.66916	3.77667	13.7054	0	0	0
MTR_6g013440	chr6	4258723..4260289	6.59639	5.2042	36.8655	0	0	0
MTR_6g013450	chr6	4265607..4267301	9.79827	4.14687	17.7146	0	0	0
MTR_6g015020	chr6	4863345..4867174	60.0662	1.66137	3.16317	0	0	0
MTR_6g015950	chr6	complement(5625967..5630667)	57.9796	1.41994	2.67575	0	0	0
MTR_6g021915	chr6	complement(7571244..7575111)	30.8932	1.94241	3.84348	0	0	0
MTR_6g027840	chr6	9767853..9770137	31.4543	2.2605	4.79159	0	0	0
MTR_6g029180	chr6	10029743..10030984	15.1784	1.70827	3.2677	0	0	0
MTR_6g034940	chr6	complement(12228075..12232530)	48.1123	9.86706	933.858	0	0	0
MTR_6g043700	chr6	complement(13228759..13230010)	11.7163	4.64574	25.0326	0	0	0
MTR_6g037750	chr6	13470318..13474508	1.68018	5.90988	60.1246	0	0	0
MTR_6g051860	chr6	complement(18052428..18058032)	5.40273	5.78422	55.1091	0	0	0
MTR_6g053600	chr6	complement(19290698..19296806)	20.842	6.22696	74.9037	0	0	0
MTR_6g056070	chr6	20114959..20118282	6.6547	4.81907	28.2283	0	0	0
MTR_6g462640	chr6	complement(21779283..21781458)	18.2901	3.11266	8.64975	0	0	0
MTR_6g079630	chr6	29058520..29059610	12.5349	3.46641	11.0533	0	0	0
MTR_6g091960	chr6	complement(34662520..34672093)	1.89352	5.97108	62.73	0	0	0
MTR_7g012350	chr7	complement(3617235..3617986)	10.021	6.12924	69.9978	0	0	0
MTR_7g027190	chr7	complement(9072111..9074523)	16.9354	9.72065	843.739	0	0	0
MTR_7g062570	chr7	complement(22774969..22776837)	22.1852	9.19598	586.498	0	0	0
MTR_7g062580	chr7	complement(22778100..22780881)	214.611	1.3146	2.48733	0	0	0
MTR_7g066070	chr7	complement(24026681..24028382)	28.3253	8.10684	275.677	0	0	0
MTR_7g068600	chr7	25143946..25146531	191.325	9.42393	686.888	0	0	0
MTR_7g070800	chr7	26203521..26205009	8.30483	5.75863	54.1403	0	0	0
MTR_7g070810	chr7	26207053..26208516	8.98642	6.06152	66.7881	0	0	0
MTR_7g071840	chr7	26649175..26649936	54.1794	3.4947	11.2722	0	0	0
MTR_7g071970	chr7	26716633..26717220	108.592	4.33828	20.228	0	0	0
MTR_7g076920	chr7	complement(29057951..29058722)	10.3526	4.46131	22.0286	0	0	0
MTR_7g077050	chr7	29101739..29102299	9.48196	5.05881	33.3313	0	0	0
MTR_7g077110	chr7	29115837..29116668	19.4366	4.07347	16.836	0	0	0
MTR_7g080950	chr7	complement(30853026..30856592)	11.6599	2.18444	4.5455	0	0	0
MTR_7g082660	chr7	31690719..31693405	4.54915	2.78248	6.88036	0	0	0
MTR_7g086100	chr7	complement(33399140..33400207)	15.514	8.3891	335.251	0	0	0
MTR_7g086140	chr7	complement(33410034..33411040)	41.9525	9.31101	635.173	0	0	0
MTR_7g086160	chr7	complement(33415916..33416902)	28.7621	8.04199	263.56	0	0	0
MTR_7g086190	chr7	complement(33423956..33424961)	40.386	8.85261	462.276	0	0	0
MTR_7g086220	chr7	complement(33436074..33436997)	47.9196	9.91419	964.869	0	0	0
MTR_7g092620	chr7	36733390..36735626	15.3973	3.34239	10.1429	0	0	0
MTR_7g098040	chr7	complement(39176359..39179545)	9.06797	4.25784	19.131	0	0	0
MTR_7g098160	chr7	complement(39222635..39225457)	5.22756	6.05928	66.6847	0	0	0
MTR_7g100990	chr7	complement(40732629..40734227)	8.53082	2.8508	7.21402	0	0	0
MTR_7g102840	chr7	complement(41306750..41310540)	10.1141	6.98141	126.361	0	0	0
MTR_7g102460	chr7	41516988..41518754	18.5066	7.55583	188.161	0	0	0
MTR_7g105570	chr7	42818404..42819772	28.9599	2.8097	7.01137	0	0	0
MTR_7g112963	chr7	complement(46481124..46491194)	8.97857	2.25804	4.78343	0	0	0
MTR_7g114870	chr7	complement(47426124..47428870)	3.55355	6.17847	72.4276	0	0	0
MTR_7g115740	chr7	47870184..47872190	3.30928	3.99134	15.9043	0	0	0
MTR_7g116650	chr7	48165459..48168646	13.3602	4.81668	28.1817	0	0	0
MTR_7g117280	chr7	48446488..48452243	12.996	2.05281	4.14912	0	0	0
MTR_8g006790	chr8	complement(970171..976661)	69.5834	9.42469	687.25	0	0	0
MTR_8g010030	chr8	complement(2516139..2519414)	5.42015	4.49104	22.4873	0	0	0
MTR_8g012805	chr8	3818423..3819345	62.2221	9.63614	795.73	0	0	0
MTR_8g012835	chr8	3859859..3860744	182.947	9.61725	785.381	0	0	0
MTR_8g018650	chr8	complement(6408474..6412307)	51.9971	1.99099	3.97509	0	0	0
MTR_8g022270	chr8	complement(7861470..7869135)	23.3814	5.82804	56.8087	0	0	0
MTR_8g022790	chr8	complement(8091969..8094128)	98.2274	-0.924892	-1.89854	0	0	0
MTR_8g031150	chr8	11640537..11641359	90.6	9.97643	1007.41	0	0	0
MTR_8g036050	chr8	complement(13202212..13204086)	20.7707	3.28264	9.73132	0	0	0
MTR_8g038210	chr8	complement(14166012..14171188)	39.389	1.7347	3.32811	0	0	0
MTR_8g038220	chr8	complement(14173121..14175833)	42.7477	2.20334	4.60545	0	0	0
MTR_8g461050	chr8	complement(21370419..21371027)	72.8713	9.21606	594.716	0	0	0
MTR_8g059790	chr8	complement(21934174..21934926)	80.1306	9.1128	553.639	0	0	0
MTR_8g055940	chr8	complement(24367089..24368154)	9.16635	6.49052	89.9167	0	0	0
MTR_8g468920	chr8	complement(24988727..24991304)	16.7248	7.9429	246.066	0	0	0
MTR_8g064840	chr8	27209650..27211771	8.87123	2.43017	5.38958	0	0	0
MTR_8g065720	chr8	complement(27336280..27338265)	5.55118	2.95463	7.75235	0	0	0
MTR_8g067940	chr8	complement(28308642..28309525)	20.668	8.29128	313.273	0	0	0
MTR_8g068030	chr8	28333693..28334711	129.251	10.0307	1046	0	0	0
MTR_8g068050	chr8	complement(28341199..28343412)	5.70493	2.08495	4.24261	0	0	0
MTR_8g068265	chr8	28466086..28471025	25.733	2.3736	5.18233	0	0	0
MTR_8g068530	chr8	complement(28597194..28600951)	11.7059	7.40213	169.147	0	0	0
MTR_8g069775	chr8	29426353..29428952	4.46793	4.16435	17.9306	0	0	0
MTR_8g071050	chr8	complement(30137402..30140758)	18.8041	7.80697	223.94	0	0	0
MTR_8g074560	chr8	31526639..31528424	23.5287	9.46701	707.707	0	0	0
MTR_8g075330	chr8	31848061..31856341	17.5625	2.35121	5.10251	0	0	0
MTR_8g075990	chr8	32142751..32146250	3.866	5.28522	38.995	0	0	0
MTR_8g083170	chr8	35105064..35112698	8.48151	5.84543	57.4975	0	0	0
MTR_8g087420	chr8	36124011..36126346	5.93882	6.95872	124.39	0	0	0
MTR_8g087710	chr8	36261986..36264406	73.623	3.71878	13.1663	0	0	0
MTR_8g087780	chr8	36321984..36325169	14.1661	8.39554	336.75	0	0	0
MTR_8g091690	chr8	38261626..38263335	27.668	7.23758	150.914	0	0	0
MTR_8g091720	chr8	38281269..38282267	7.82281	4.71787	26.316	0	0	0
MTR_8g092290	chr8	38559311..38563785	7.51976	8.39703	337.099	0	0	0
MTR_8g103227	chr8	43449553..43456981	7.64869	4.42919	21.5437	0	0	0
MTR_8g103233	chr8	43461498..43464017	2.87865	3.7639	13.5846	0	0	0
MTR_8g107250	chr8	45318751..45321187	25.3467	2.94266	7.6883	0	0	0
MTR_8g107450	chr8	45426242..45429972	17.4095	4.74396	26.7963	0	0	0
MTR_8g107510	chr8	45457929..45461875	5.39174	2.69131	6.45898	0	0	0
MTR_0011s0280	scaffold0011	229705..232158	89.3553	2.48824	5.61092	0	0	0
MTR_0021s0370	scaffold0021	158580..161378	214.804	2.14237	4.41486	0	0	0
MTR_0055s0080	scaffold0055	30838..31389	13.4725	3.79311	13.8625	0	0	0
MTR_0205s0040	scaffold0205	complement(12718..21736)	17.6698	9.88277	944.081	0	0	0
MTR_0211s0080	scaffold0211	complement(25794..26510)	51.3137	8.95478	496.201	0	0	0
MTR_0262s0060	scaffold0262	complement(15322..17184)	15.1729	2.72928	6.63124	0	0	0
MTR_0536s0010	scaffold0536	470..1930	6.39152	6.6581	100.992	0	0	0
MTR_4g021725	chr4	complement(7153291..7155063)	2548.68	1.04352	2.06125	1.11022e-16	2.27659e-14	5.60041e-12
MTR_4g104020	chr4	43029167..43030858	17.899	10.3303	1287.46	1.11022e-16	2.27659e-14	5.60041e-12
MTR_6g006990	chr6	1322138..1326461	2.82291	5.68528	51.4564	1.11022e-16	2.27659e-14	5.60041e-12
MTR_8g033380	chr8	complement(12871549..12874562)	6.60289	3.13932	8.81111	1.11022e-16	2.27659e-14	5.60041e-12
MTR_2g090240	chr2	38343844..38346083	56.0798	1.39643	2.63249	2.22045e-16	4.49832e-14	1.12008e-11
MTR_3g078623	chr3	35438534..35441319	2.87701	6.33146	80.5304	2.22045e-16	4.49832e-14	1.12008e-11
MTR_3g109610	chr3	51268479..51271917	43.7695	1.48833	2.80565	2.22045e-16	4.49832e-14	1.12008e-11
MTR_3g020970	chr3	complement(6085321..6086366)	54.3105	1.70709	3.26502	4.44089e-16	8.88954e-14	2.24016e-11
MTR_4g133010	chr4	55649383..55649985	17.2969	8.01391	258.481	4.44089e-16	8.88954e-14	2.24016e-11
MTR_7g108815	chr7	44442430..44443124	7.9192	5.66673	50.7992	4.44089e-16	8.88954e-14	2.24016e-11
MTR_4g094535	chr4	complement(38176632..38179308)	4.95882	2.90266	7.47802	5.55112e-16	1.09383e-13	2.8002e-11
MTR_7g033325	chr7	complement(11911787..11914483)	10.0136	1.84258	3.5865	5.55112e-16	1.09383e-13	2.8002e-11
MTR_7g070870	chr7	26226485..26228070	2.83571	4.05367	16.6064	5.55112e-16	1.09383e-13	2.8002e-11
MTR_0083s0100	scaffold0083	45281..49347	8.1545	1.64765	3.13324	5.55112e-16	1.09383e-13	2.8002e-11
MTR_4g074130	chr4	28190446..28193469	3.81465	3.81755	14.0993	7.77156e-16	1.51362e-13	3.92029e-11
MTR_8g060550	chr8	complement(21403659..21404261)	12.3573	7.02035	129.818	7.77156e-16	1.51362e-13	3.92029e-11
MTR_8g087810	chr8	36328886..36332433	6.10712	8.06598	267.98	7.77156e-16	1.51362e-13	3.92029e-11
MTR_7g086230	chr7	complement(33441805..33442422)	18.0311	7.88942	237.111	9.99201e-16	1.9386e-13	5.04037e-11
MTR_3g099740	chr3	45724895..45726696	11.2523	2.16321	4.47911	1.22125e-15	2.34238e-13	6.16045e-11
MTR_4g126930	chr4	52599413..52602267	3.10742	4.09372	17.0739	1.22125e-15	2.34238e-13	6.16045e-11
MTR_7g028805	chr7	9930700..9931125	9.09538	4.76372	27.1658	1.22125e-15	2.34238e-13	6.16045e-11
MTR_3g014870	chr3	4294893..4295552	36.7102	10.0063	1028.51	1.33227e-15	2.54564e-13	6.72049e-11
MTR_5g044220	chr5	19437916..19441546	17.5861	1.6971	3.24248	1.55431e-15	2.95871e-13	7.84057e-11
MTR_4g075150	chr4	28685986..28692813	41.2438	1.33725	2.52669	1.9984e-15	3.78975e-13	1.00807e-10
MTR_4g102310	chr4	complement(42392718..42394804)	11.5133	9.88637	946.439	2.22045e-15	4.17941e-13	1.12008e-10
MTR_6g073090	chr6	27150313..27151482	14.5075	7.07648	134.969	2.22045e-15	4.17941e-13	1.12008e-10
MTR_5g083030	chr5	35819773..35821937	4.07869	2.58502	6.00024	2.88658e-15	5.41303e-13	1.45611e-10
MTR_7g105460	chr7	42767773..42769796	9.05958	2.55779	5.88803	4.10783e-15	7.67463e-13	2.07215e-10
MTR_7g086090	chr7	complement(33395401..33397154)	29.0076	9.88954	948.522	5.21805e-15	9.71289e-13	2.63219e-10
MTR_2g437880	chr2	14956039..14961072	7.42958	2.65275	6.28864	5.66214e-15	1.05008e-12	2.85621e-10
MTR_2g042570	chr2	18566744..18571686	1.68357	4.78263	27.5241	6.99441e-15	1.2924e-12	3.52826e-10
MTR_2g096840	chr2	41387108..41388947	12.702	3.02606	8.14583	8.32667e-15	1.53296e-12	4.20031e-10
MTR_4g102280	chr4	complement(42375953..42379136)	20.273	1.30415	2.46937	9.21485e-15	1.69031e-12	4.64834e-10
MTR_1g070135	chr1	complement(30807644..30809581)	58.7356	1.17129	2.25212	9.88098e-15	1.80593e-12	4.98436e-10
MTR_7g031847	chr7	complement(11093320..11095045)	5.36445	4.4207	21.4172	1.0103e-14	1.83985e-12	5.09637e-10
MTR_1g033360	chr1	complement(12003770..12005171)	32.0164	9.82184	905.041	1.09912e-14	1.99439e-12	5.5444e-10
MTR_4g114320	chr4	complement(46984729..46986569)	2.58612	4.41354	21.3113	1.66533e-14	3.01097e-12	8.40061e-10
MTR_4g130270	chr4	54266443..54269143	7.01	2.27171	4.82896	1.95399e-14	3.52026e-12	9.85672e-10
MTR_6g007690	chr6	1785079..1788545	3.70983	5.00643	32.1429	2.12053e-14	3.80668e-12	1.06968e-09
MTR_0002s1060	scaffold0002	complement(400364..401875)	162.245	1.34583	2.54176	3.30846e-14	5.91816e-12	1.66892e-09
MTR_3g058630	chr3	complement(23324436..23327093)	8.76837	1.69485	3.23743	3.35287e-14	5.97641e-12	1.69132e-09
MTR_2g081630	chr2	complement(34259869..34260235)	11.4212	5.81275	56.21	3.51941e-14	6.25116e-12	1.77533e-09
MTR_8g031170	chr8	11654482..11655060	33.8268	9.69422	828.42	3.75255e-14	6.64189e-12	1.89294e-09
MTR_7g012340	chr7	3618696..3619262	6.67217	5.37955	41.63	4.38538e-14	7.73483e-12	2.21216e-09
MTR_1g115195	chr1	51864615..51865729	25.4599	1.87411	3.66575	5.27356e-14	9.26897e-12	2.66019e-09
MTR_4g128180	chr4	53348816..53350493	4.41905	4.94281	30.7562	5.92859e-14	1.03841e-11	2.99062e-09
MTR_7g053290	chr7	complement(18744136..18751674)	40.4405	1.16704	2.24551	7.01661e-14	1.22473e-11	3.53946e-09
MTR_4g109150	chr4	45283948..45285675	4.70551	7.43168	172.647	7.18314e-14	1.24947e-11	3.62346e-09
MTR_2g438560	chr2	complement(15587523..15589330)	11.4455	2.04171	4.11732	7.88258e-14	1.36642e-11	3.97629e-09
MTR_5g081780	chr5	35051145..35052061	20.7261	9.34406	649.893	1.02585e-13	1.77218e-11	5.17478e-09
MTR_7g011663	chr7	complement(3175131..3186380)	29.7512	1.62275	3.07963	1.05471e-13	1.81583e-11	5.32039e-09
MTR_3g058250	chr3	complement(23038848..23040564)	3.57944	2.23532	4.70869	1.09246e-13	1.87442e-11	5.5108e-09
MTR_6g086575	chr6	complement(32589301..32592601)	3.36502	5.79073	55.3584	1.12355e-13	1.92123e-11	5.66761e-09
MTR_1g080780	chr1	complement(35928444..35929462)	7.12178	5.73989	53.4415	1.22458e-13	2.08691e-11	6.17725e-09
MTR_8g024310	chr8	complement(8913902..8918194)	86.843	1.21079	2.31464	1.82188e-13	3.09437e-11	9.19027e-09
MTR_1g069620	chr1	complement(30273938..30277729)	5.55578	9.23866	604.106	1.96509e-13	3.32642e-11	9.91272e-09
MTR_3g085740	chr3	38793220..38797762	81.043	1.19996	2.29733	2.06946e-13	3.49136e-11	1.04392e-08
MTR_3g008010	chr3	complement(1280979..1283041)	8.46807	9.1783	579.354	2.27596e-13	3.82695e-11	1.14808e-08
MTR_4g057730	chr4	21241898..21245081	1.88558	2.74852	6.72029	2.37255e-13	3.9761e-11	1.19681e-08
MTR_2g063813	chr2	complement(26956988..26965805)	1.6233	7.28909	156.4	2.53464e-13	4.23369e-11	1.27857e-08
MTR_8g089190	chr8	complement(37053824..37055698)	12.8313	2.38902	5.23802	2.78555e-13	4.63743e-11	1.40514e-08
MTR_8g074920	chr8	31673934..31676543	21.3214	1.18018	2.26605	3.68705e-13	6.11808e-11	1.8599e-08
MTR_7g080180	chr7	complement(30482239..30489482)	13.1665	1.86401	3.64018	5.24358e-13	8.67237e-11	2.64507e-08
MTR_4g133720	chr4	55939092..55939798	4.74241	5.20669	36.9291	6.4404e-13	1.0617e-10	3.2488e-08
MTR_4g096690	chr4	38471181..38475507	47.2105	1.17762	2.26203	6.80456e-13	1.11808e-10	3.43249e-08
MTR_4g057865	chr4	21371108..21373227	8.84412	3.09999	8.57413	9.46021e-13	1.54939e-10	4.77211e-08
MTR_5g083520	chr5	36047530..36052948	24.7251	1.29122	2.44734	1.21414e-12	1.98207e-10	6.12461e-08
MTR_3g089125	chr3	complement(40831984..40834426)	4.4661	3.4203	10.7056	1.30551e-12	2.12436e-10	6.58552e-08
MTR_4g057890	chr4	complement(21384217..21386449)	4.64218	2.34475	5.07973	1.31628e-12	2.135e-10	6.63984e-08
MTR_7g086820	chr7	complement(33763582..33764919)	12.1329	8.9308	488.023	1.43252e-12	2.31609e-10	7.22621e-08
MTR_5g064990	chr5	27319869..27321352	4.94513	1.85233	3.61082	1.53033e-12	2.46633e-10	7.7196e-08
MTR_1g102070	chr1	46102116..46104813	5.76793	1.70218	3.25392	1.69564e-12	2.72405e-10	8.5535e-08
MTR_7g079440	chr7	complement(30155362..30162536)	31.0344	1.17579	2.25916	1.78335e-12	2.85585e-10	8.99594e-08
MTR_7g090520	chr7	complement(35626006..35627708)	34.818	1.7932	3.46582	1.87295e-12	2.98984e-10	9.44789e-08
MTR_2g104130	chr2	44868826..44871074	34.5823	1.26843	2.40899	2.40874e-12	3.83301e-10	1.21506e-07
MTR_1g110290	chr1	complement(49735117..49737508)	5.43463	2.05916	4.16745	2.58915e-12	4.09971e-10	1.30607e-07
MTR_7g055743	chr7	complement(19128430..19132762)	3.22961	6.10637	68.897	2.59259e-12	4.09971e-10	1.30781e-07
MTR_8g012885	chr8	3900586..3901381	35.3574	8.93542	489.587	3.51164e-12	5.53565e-10	1.77141e-07
MTR_4g117750	chr4	48862818..48864913	2.73983	2.32605	5.01429	3.68883e-12	5.79686e-10	1.86079e-07
MTR_3g019160	chr3	5351072..5352297	103.816	0.725934	1.65397	4.25149e-12	6.66031e-10	2.14462e-07
MTR_2g025170	chr2	8954695..8955548	12.3848	1.96136	3.89429	4.31455e-12	6.73818e-10	2.17643e-07
MTR_7g087400	chr7	33992300..33996425	4.46942	1.95462	3.87615	5.46097e-12	8.50225e-10	2.75473e-07
MTR_8g012850	chr8	3868606..3869836	29.2867	8.67882	409.812	5.49172e-12	8.52382e-10	2.77024e-07
MTR_7g071760	chr7	26613612..26614361	6.55463	6.94343	123.078	6.28786e-12	9.72959e-10	3.17185e-07
MTR_4g009960	chr4	complement(2144712..2156354)	5.46938	1.2201	2.32964	7.65299e-12	1.18057e-09	3.86047e-07
MTR_6g477760	chr6	28528572..28534464	2.18589	6.83179	113.913	7.6803e-12	1.18117e-09	3.87425e-07
MTR_0045s0060	scaffold0045	22594..28397	39.2413	1.95084	3.86598	7.84472e-12	1.20279e-09	3.95719e-07
MTR_4g058730	chr4	21611170..21613905	3.71944	1.81361	3.5152	8.25762e-12	1.26226e-09	4.16547e-07
MTR_1g116890	chr1	52795806..52798189	9.77218	1.41198	2.66103	8.48088e-12	1.29248e-09	4.2781e-07
MTR_3g058000	chr3	complement(22946208..22947981)	10.3495	1.66314	3.16705	8.63798e-12	1.31245e-09	4.35734e-07
MTR_2g093810	chr2	complement(40012105..40013370)	3.34445	3.55521	11.755	1.00466e-11	1.5219e-09	5.06792e-07
MTR_2g073420	chr2	31129442..31132001	71.231	-0.952123	-1.93472	1.1334e-11	1.71178e-09	5.71735e-07
MTR_3g057970	chr3	complement(22931720..22934239)	4.92452	1.52322	2.87432	1.15322e-11	1.73651e-09	5.81731e-07
MTR_1g099310	chr1	44834080..44835334	422.5	-1.23089	-2.34712	1.25738e-11	1.88772e-09	6.34274e-07
MTR_2g029300	chr2	10930336..10936870	4.12983	8.51988	367.062	1.35489e-11	2.02808e-09	6.83463e-07
MTR_3g078410	chr3	35327706..35337657	9.60287	1.17618	2.25978	1.68849e-11	2.51995e-09	8.51744e-07
MTR_4g005230	chr4	complement(124806..131589)	5.84209	8.50305	362.804	1.92975e-11	2.87151e-09	9.73441e-07
MTR_3g106430	chr3	complement(49190319..49192902)	65.7729	1.14431	2.21041	2.23184e-11	3.31126e-09	1.12583e-06
MTR_4g100480	chr4	41422220..41425247	4.21479	2.34139	5.06791	2.43304e-11	3.59919e-09	1.22732e-06
MTR_7g088350	chr7	complement(34398447..34403528)	13.9635	1.12313	2.17819	2.54887e-11	3.75951e-09	1.28575e-06
MTR_7g071790	chr7	26628624..26629267	4.66742	5.04274	32.9621	2.58853e-11	3.80131e-09	1.30576e-06
MTR_8g076940	chr8	32650395..32654772	24.0953	1.09881	2.14178	2.59228e-11	3.80131e-09	1.30765e-06
MTR_1g021638	chr1	6521275..6522643	6.78084	1.86027	3.63077	2.69272e-11	3.93715e-09	1.35832e-06
MTR_8g032610	chr8	complement(12507341..12508908)	5.60034	1.81585	3.52068	2.72246e-11	3.96912e-09	1.37332e-06
MTR_1g096240	chr1	43327224..43331625	47.2911	1.03857	2.05419	2.83489e-11	4.12113e-09	1.43003e-06
MTR_2g014920	chr2	4342669..4347110	5.05457	1.77394	3.41986	2.88045e-11	4.17533e-09	1.45301e-06
MTR_7g009410	chr7	2050515..2052629	6.80562	8.41078	340.328	3.18167e-11	4.59874e-09	1.60496e-06
MTR_4g116610	chr4	complement(48308548..48308883)	18.1947	1.95999	3.8906	3.46113e-11	4.98838e-09	1.74593e-06
MTR_8g067980	chr8	28315848..28316630	10.6843	8.48504	358.305	3.50285e-11	5.03413e-09	1.76698e-06
MTR_5g086080	chr5	37215665..37218881	2.06764	3.40753	10.6113	3.97712e-11	5.69948e-09	2.00622e-06
MTR_5g012270	chr5	complement(3644799..3647379)	3.1123	2.1929	4.57225	4.31304e-11	6.16337e-09	2.17567e-06
MTR_7g103450	chr7	41858984..41861868	40.9515	1.05138	2.07251	4.5527e-11	6.48747e-09	2.29657e-06
MTR_3g020800	chr3	6034245..6035685	12.8774	6.56389	94.6079	4.68129e-11	6.65191e-09	2.36143e-06
MTR_4g121880	chr4	complement(50292139..50299737)	39.0386	1.0482	2.06795	4.83591e-11	6.85232e-09	2.43943e-06
MTR_7g115050	chr7	47501145..47503452	4.9972	8.3913	335.764	4.88612e-11	6.90408e-09	2.46476e-06
MTR_3g087980	chr3	39878065..39887996	19.4738	1.15724	2.2303	5.06104e-11	7.13126e-09	2.55299e-06
MTR_6g036780	chr6	12897180..12900412	0.875457	4.61497	24.5044	5.2198e-11	7.33448e-09	2.63308e-06
MTR_3g434790	chr3	complement(11317144..11318156)	5.08453	2.39249	5.25064	5.90409e-11	8.27294e-09	2.97826e-06
MTR_4g133890	chr4	56004969..56009577	9.13275	1.4184	2.6729	6.00859e-11	8.39605e-09	3.03097e-06
MTR_4g131180	chr4	complement(54724088..54728861)	42.7439	1.0507	2.07153	6.50122e-11	9.05933e-09	3.27948e-06
MTR_7g106880	chr7	complement(43529266..43537557)	1.58294	3.04966	8.28016	6.61924e-11	9.19837e-09	3.33901e-06
MTR_7g105560	chr7	42809591..42812532	7.75125	2.67042	6.36614	7.22172e-11	1.0008e-08	3.64293e-06
MTR_3g462710	chr3	complement(25072267..25075832)	11.5813	1.07789	2.11094	7.30285e-11	1.00927e-08	3.68385e-06
MTR_8g012890	chr8	3903544..3903985	17.3207	6.66886	101.749	7.81142e-11	1.07661e-08	3.94039e-06
MTR_4g104060	chr4	43051480..43053398	1.97976	2.70207	6.50734	7.97178e-11	1.09572e-08	4.02128e-06
MTR_3g111780	chr3	complement(52289425..52290522)	6.54751	8.26453	307.518	8.23369e-11	1.12864e-08	4.1534e-06
MTR_3g021430	chr3	complement(6277153..6281110)	50.838	-0.690489	-1.61383	8.63998e-11	1.18112e-08	4.35835e-06
MTR_7g044980	chr7	complement(15128895..15130291)	413.895	0.875934	1.8352	8.8909e-11	1.21214e-08	4.48493e-06
MTR_4g019225	chr4	6021969..6027894	114.973	-0.924533	-1.89807	9.19192e-11	1.2498e-08	4.63677e-06
MTR_7g061780	chr7	complement(22354034..22356603)	6.66546	8.15584	285.203	1.08739e-10	1.47452e-08	5.48522e-06
MTR_7g081050	chr7	30902997..30905931	5.06038	8.14351	282.775	1.12476e-10	1.52111e-08	5.67374e-06
MTR_3g079560	chr3	complement(35909107..35911950)	4.60802	8.1827	290.562	1.17937e-10	1.59069e-08	5.9492e-06
MTR_5g094380	chr5	complement(41238888..41241214)	3.92208	8.16611	287.239	1.20061e-10	1.61503e-08	6.05634e-06
MTR_3g073820	chr3	complement(33321515..33332916)	0.785139	6.43131	86.3011	1.28792e-10	1.72787e-08	6.49678e-06
MTR_0021s0160	scaffold0021	60782..62658	2.21474	3.07881	8.44919	1.43221e-10	1.91635e-08	7.22466e-06
MTR_3g117690	chr3	55101541..55103878	2.56587	6.41116	85.1041	1.46026e-10	1.94872e-08	7.36615e-06
MTR_1g116000	chr1	complement(52419232..52420234)	3.69715	2.88138	7.36856	1.50851e-10	2.0078e-08	7.60954e-06
MTR_6g034195	chr6	11591273..11598330	25.4994	0.991585	1.98837	1.64595e-10	2.18495e-08	8.30282e-06
MTR_2g031420	chr2	complement(11802695..11804357)	1.58265	5.14958	35.4959	1.7114e-10	2.26587e-08	8.63296e-06
MTR_3g007770	chr3	complement(1173614..1180993)	4.83211	1.2061	2.30714	1.74015e-10	2.29791e-08	8.778e-06
MTR_8g068300	chr8	28474611..28479112	4.24157	1.83451	3.56649	1.8067e-10	2.37956e-08	9.11371e-06
MTR_1g099360	chr1	complement(44850186..44854800)	51.9971	1.0297	2.0416	2.28451e-10	3.00103e-08	1.1524e-05
MTR_7g093030	chr7	complement(36940271..36942876)	4.26111	1.79255	3.46427	2.32392e-10	3.04487e-08	1.17228e-05
MTR_3g078250	chr3	complement(35245629..35248236)	1.06921	4.72587	26.4623	2.37009e-10	3.09732e-08	1.19557e-05
[truncated: 1,065 more rows]
